# Supplementary material for: Histone deposition pathways determine the chromatin landscapes of H3.1 and H3.3 K27M oncohistones
Source: bioRxiv preprint, doi:10.1101/2020.05.18.101709, version 3 (2020-09-08)
Supplement: Table 1 [file 101709_file05.xlsx]

## Sheet: Read_me
Supplementary Table S1: Genomic coordinate lists in bed file format of differential H3K27me3 domains determined as described in Methods and displayed in Figure 4 (H3K27me3 clusters), or of peak calling results for the indicated target in the indicated cell line (all other tabs).

## Sheet: H3K27me3 clusters
Chromosome	Start position	End position	Cluster	Gene TSS overlaps
chr1	30360	40472	2	.
chr1	54846	72246	2	OR4F5
chr1	87109	90435	4	.
chr1	256614	267700	1	.
chr1	335742	346596	1	.
chr1	346596	369492	1	.
chr1	413375	417715	1	.
chr1	586393	597329	1	.
chr1	597862	601439	1	.
chr1	618626	637568	1	OR4F16
chr1	796503	812546	2	.
chr1	812880	834567	2	.
chr1	859585	869859	2	SAMD11
chr1	869859	879112	2	.
chr1	902332	939543	2	HES4,ISG15,PERM1,PLEKHN1
chr1	1009351	1013295	1	RNF223
chr1	1051454	1056858	1	C1orf159
chr1	1519356	1528788	1	.
chr1	1913283	1917025	1	.
chr1	1919654	1924088	1	.
chr1	1925232	1959753	2	CFAP74,GABRD
chr1	2461282	2464567	1	HES5
chr1	2510758	2514326	1	.
chr1	2579982	2633305	2	.
chr1	2684328	2691982	1	.
chr1	2693761	2702024	1	.
chr1	2714878	2727053	1	.
chr1	2730080	2735551	2	.
chr1	2737063	2785605	2	.
chr1	2790088	2796017	2	.
chr1	2821500	2825316	1	.
chr1	2862929	2869321	1	.
chr1	2912182	2919589	1	.
chr1	2959357	2966028	1	.
chr1	3363819	3368226	1	.
chr1	3574379	3578697	4	.
chr1	3670957	3678307	1	.
chr1	3998524	4025449	2	.
chr1	4037946	4050061	1	.
chr1	4053071	4057980	1	.
chr1	4071392	4097844	1	.
chr1	4103003	4112157	1	.
chr1	4140715	4145851	1	.
chr1	4168071	4182068	1	.
chr1	4190304	4195750	2	.
chr1	4217665	4236887	1	.
chr1	4239915	4244642	1	.
chr1	4246437	4253281	1	.
chr1	4416077	4420527	1	.
chr1	4453107	4458651	1	.
chr1	4499873	4509423	1	.
chr1	4564539	4568632	1	.
chr1	4585119	4589243	1	.
chr1	4628266	4633508	1	.
chr1	4659630	4667294	1	.
chr1	4709483	4714707	2	AJAP1
chr1	4715868	4723013	2	.
chr1	4791012	4796919	1	.
chr1	5034455	5040469	1	.
chr1	5710581	5718204	1	.
chr1	5726424	5733907	2	.
chr1	5742756	5746936	1	.
chr1	5776116	5783602	1	.
chr1	5804429	5809409	1	.
chr1	5871379	5875979	2	.
chr1	5892538	5900754	2	.
chr1	5908118	5913664	1	.
chr1	6220820	6228967	1	.
chr1	6235312	6243200	2	CHD5
chr1	6464858	6470043	1	.
chr1	6474303	6485285	4	ESPN,HES2
chr1	6514861	6518260	1	.
chr1	6763481	6771988	2	.
chr1	6776035	6779284	1	.
chr1	6781608	6793661	1	.
chr1	6805924	6817538	1	.
chr1	6821301	6826921	1	.
chr1	7153277	7160637	1	.
chr1	7223283	7229634	1	.
chr1	7682470	7689631	1	.
chr1	7985498	7996558	4	.
chr1	8005209	8011241	4	.
chr1	9097042	9107146	1	.
chr1	9132471	9136895	1	.
chr1	9148720	9154417	2	SLC2A5
chr1	9189281	9198425	2	GPR157
chr1	9230213	9257489	1	.
chr1	9265524	9274187	2	.
chr1	9353282	9360134	1	SPSB1
chr1	9438114	9443846	1	.
chr1	9448534	9452177	1	.
chr1	9477282	9486445	2	.
chr1	9493808	9507155	1	.
chr1	9508734	9513402	1	.
chr1	9520779	9538427	2	.
chr1	9706213	9731992	2	PIK3CD
chr1	10860453	10864300	1	.
chr1	10865926	10871935	1	.
chr1	10942210	10953047	1	.
chr1	11396980	11411784	1	.
chr1	11434646	11441496	1	.
chr1	11446145	11458942	1	.
chr1	11466970	11479429	1	.
chr1	11493538	11529204	1	.
chr1	11533434	11551465	1	DISP3
chr1	11554076	11561833	1	.
chr1	11596066	11602663	2	.
chr1	11604156	11609665	1	.
chr1	11620103	11633285	2	.
chr1	11635110	11665942	1	.
chr1	11670642	11705054	1	.
chr1	11912578	11937818	2	NPPB
chr1	11940447	11961945	1	.
chr1	12119431	12140605	2	TNFRSF8
chr1	12179596	12185277	1	.
chr1	12599392	12605683	1	.
chr1	12637467	12641011	1	.
chr1	12651309	12659660	1	.
chr1	12673055	12685511	2	DHRS3
chr1	12702434	12708405	1	AADACL4
chr1	12766734	12773345	1	.
chr1	12809443	12821266	1	.
chr1	12836187	12844627	1	.
chr1	12878565	12887936	1	.
chr1	12934162	12942280	1	.
chr1	12977786	12983084	1	.
chr1	13020441	13026367	1	.
chr1	13035425	13041013	1	.
chr1	13143092	13150097	1	.
chr1	13151362	13159035	2	.
chr1	13160164	13168613	1	.
chr1	13176076	13180738	1	.
chr1	13189363	13219906	1	.
chr1	13326306	13332814	1	PRAMEF18
chr1	13338306	13347911	1	.
chr1	13425682	13431238	1	.
chr1	13436146	13441453	1	.
chr1	13459538	13467372	1	.
chr1	13646348	13652422	1	.
chr1	13680723	13690541	1	.
chr1	13832513	13845164	2	LRRC38
chr1	14167725	14173670	1	.
chr1	14211847	14223881	2	KAZN
chr1	14922319	14930967	2	.
chr1	16832352	16847729	2	.
chr1	16853124	16886322	2	FAM231B
chr1	16937310	16944278	1	NBPF1
chr1	16980541	17021563	2	FAM231A
chr1	17028722	17077723	2	FAM231C
chr1	17087462	17118312	2	.
chr1	17181285	17207552	2	.
chr1	17207552	17219518	3	.
chr1	17219518	17234708	2	.
chr1	17382448	17389196	1	.
chr1	17441032	17448431	1	PADI2
chr1	17463309	17470213	1	.
chr1	17471075	17475466	1	.
chr1	17501887	17510359	1	.
chr1	17525864	17532811	1	PADI1
chr1	17650000	17655075	1	.
chr1	17705035	17710299	1	.
chr1	17784742	17788846	1	.
chr1	18257951	18267284	1	.
chr1	18272574	18283091	1	.
chr1	18300507	18304456	1	.
chr1	18329279	18335351	1	.
chr1	18343530	18362980	1	.
chr1	18430730	18439826	2	IGSF21
chr1	18608743	18613938	1	.
chr1	18860175	18866006	1	.
chr1	18872720	18891591	1	.
chr1	18911377	18928347	1	.
chr1	18928905	18949355	2	.
chr1	18952802	18975957	3	PAX7
chr1	18975966	19002411	2	.
chr1	19009600	19062000	2	.
chr1	19065431	19069584	1	.
chr1	19094549	19122008	2	.
chr1	19127674	19147920	1	.
chr1	19178089	19181139	1	.
chr1	19190983	19195922	1	.
chr1	19285864	19295162	1	.
chr1	19300005	19316604	1	.
chr1	19321930	19333255	1	.
chr1	19349625	19357173	1	.
chr1	19360403	19369827	1	.
chr1	19379636	19386482	1	.
chr1	19880947	19887511	1	.
chr1	19915973	19920348	1	.
chr1	19986128	20016840	2	HTR6
chr1	20019655	20023679	1	.
chr1	20026899	20042818	1	.
chr1	20057560	20091265	2	.
chr1	20097984	20103323	1	.
chr1	20105800	20118061	1	.
chr1	20121439	20152576	2	RNF186,TMCO4
chr1	20161414	20186101	1	.
chr1	20193021	20200620	1	.
chr1	20252537	20258342	1	.
chr1	20281805	20304672	1	.
chr1	20306157	20321453	1	PLA2G2A
chr1	20351979	20357176	1	PLA2G5
chr1	20358815	20363632	1	.
chr1	20365416	20371352	1	.
chr1	20378507	20383172	1	.
chr1	20393223	20397973	1	.
chr1	20404573	20408979	1	.
chr1	20416451	20422038	1	.
chr1	20476101	20482658	1	.
chr1	20489511	20494780	1	.
chr1	20509810	20517412	1	UBXN10
chr1	20538190	20543649	2	.
chr1	20549882	20564935	1	.
chr1	20582158	20589183	1	.
chr1	20615268	20618732	1	VWA5B1
chr1	20641366	20655782	2	.
chr1	20661659	20664971	1	.
chr1	20680861	20704043	2	.
chr1	20709290	20718085	2	.
chr1	20767034	20787348	1	.
chr1	20790722	20795687	1	.
chr1	20798807	20822059	2	CAMK2N1
chr1	20837448	20841593	1	.
chr1	20842682	20847365	1	.
chr1	20849422	20863269	1	.
chr1	20865089	20892991	2	FAM43B
chr1	20897655	20902375	1	.
chr1	20906726	20922425	2	CDA
chr1	20932344	20936106	1	.
chr1	20950252	20954911	1	.
chr1	21721699	21728239	1	.
chr1	21809476	21812883	1	.
chr1	22466034	22469270	1	.
chr1	22506770	22513489	1	.
chr1	22551104	22555357	1	.
chr1	22559995	22564712	1	.
chr1	22672595	22681162	1	.
chr1	22692480	22698100	1	.
chr1	22707814	22711696	1	.
chr1	22712769	22718474	1	.
chr1	22721932	22733160	1	.
chr1	22743009	22747421	1	.
chr1	22749599	22756085	1	.
chr1	22757900	22764095	2	.
chr1	22870384	22876394	1	.
chr1	22889823	22893859	1	EPHA8
chr1	22933774	22964985	2	C1QA
chr1	22980639	22986588	1	.
chr1	23272857	23286748	1	.
chr1	23541386	23548454	1	.
chr1	23946087	23949412	1	.
chr1	23971851	23979155	1	.
chr1	23995093	24000968	1	.
chr1	24003138	24010736	2	.
chr1	24161392	24165778	2	HMGCL
chr1	24217790	24222031	1	.
chr1	24225208	24237022	2	.
chr1	24256609	24260635	1	.
chr1	24435670	24443182	1	MYOM3
chr1	24468361	24481054	1	IL22RA1
chr1	24490485	24517869	1	IFNLR1
chr1	24646774	24652672	4	.
chr1	24817245	24821888	1	.
chr1	24823271	24835721	4	RCAN3
chr1	24843516	24877619	4	.
chr1	24932801	24937652	1	.
chr1	24941060	24944770	1	.
chr1	25183695	25189954	1	.
chr1	25192040	25207127	1	.
chr1	25224097	25228269	1	.
chr1	25261489	25273536	2	.
chr1	25287647	25291276	1	RUNX3
chr1	25293891	25300541	1	.
chr1	25311675	25318438	1	.
chr1	25330308	25338236	1	.
chr1	25352558	25357407	1	.
chr1	25364952	25369409	1	.
chr1	25377710	25383314	1	.
chr1	25419417	25429126	1	.
chr1	25454285	25475384	1	.
chr1	25483517	25486861	1	.
chr1	25488246	25498193	1	.
chr1	25531587	25538970	1	.
chr1	26246247	26256395	2	.
chr1	26346273	26355718	1	EXTL1
chr1	26381241	26431611	2	TRIM63
chr1	26469731	26473618	1	.
chr1	26475235	26481428	1	.
chr1	26519621	26526350	1	.
chr1	26528360	26533644	1	.
chr1	26534164	26540256	1	.
chr1	26541394	26545499	1	.
chr1	26637906	26643523	1	.
chr1	26648483	26672267	2	.
chr1	26680827	26695438	2	CRYBG2
chr1	26698351	26702824	1	ZNF683
chr1	26705002	26738847	2	LIN28A
chr1	26743485	26754681	2	.
chr1	26986080	26992264	4	.
chr1	27290207	27299235	1	.
chr1	27309111	27320508	2	TRNP1
chr1	27400576	27405680	4	.
chr1	27637070	27643902	2	.
chr1	28451452	28455251	1	.
chr1	29447165	29452351	1	TMEM200B
chr1	29557185	29577599	2	MECR,PTPRU
chr1	29579126	29602064	2	.
chr1	29609195	29627584	1	.
chr1	29647390	29651956	1	.
chr1	29664060	29680434	1	.
chr1	29684693	29689042	1	.
chr1	29695113	29703991	1	.
chr1	29708038	29714264	1	.
chr1	29735523	29739808	1	.
chr1	29746921	29751784	1	.
chr1	29763369	29773766	1	.
chr1	29795118	29808091	2	.
chr1	29824230	29830626	1	.
chr1	29835643	29856370	2	.
chr1	30044582	30058315	2	.
chr1	30064014	30068916	1	.
chr1	30099001	30107600	1	.
chr1	30111863	30119483	1	.
chr1	30138312	30142517	1	.
chr1	30149396	30156999	1	.
chr1	30162835	30167112	1	.
chr1	30171819	30185304	1	.
chr1	30237826	30244126	1	.
chr1	30252543	30260553	2	.
chr1	30262393	30266510	1	.
chr1	30273734	30277976	1	.
chr1	30302956	30314833	1	.
chr1	30324030	30330447	1	.
chr1	30369039	30376305	1	.
chr1	30524534	30530862	1	.
chr1	30553500	30559510	1	.
chr1	30575911	30588572	1	.
chr1	30590242	30595107	1	.
chr1	30610033	30615041	1	.
chr1	30639463	30644833	1	.
chr1	30648148	30653057	1	.
chr1	30707683	30735646	2	.
chr1	30739364	30744236	1	.
chr1	30762740	30768626	1	.
chr1	30782881	30792938	1	.
chr1	30812188	30824179	1	.
chr1	30848294	30859504	1	.
chr1	30890619	30897996	1	.
chr1	31032236	31040740	1	.
chr1	31064276	31072603	1	.
chr1	31097907	31102975	1	.
chr1	31108821	31124602	1	.
chr1	31137030	31143437	1	.
chr1	31153412	31171115	2	.
chr1	31175147	31181716	1	.
chr1	31273751	31288533	1	.
chr1	31880810	31899050	1	SERINC2
chr1	31907645	31913756	1	.
chr1	31921443	31949845	2	.
chr1	31952332	31962959	1	.
chr1	31994576	32000819	1	.
chr1	32002449	32005532	1	.
chr1	32024822	32038228	1	.
chr1	32043987	32047664	1	.
chr1	32052184	32084688	1	HCRTR1
chr1	32114527	32121243	1	.
chr1	32892486	32896824	1	.
chr1	32908728	32913351	1	.
chr1	33348545	33376166	2	HPCA,TMEM54
chr1	33380940	33385814	1	.
chr1	33652459	33662677	1	.
chr1	33862708	33879387	1	.
chr1	33885159	33917000	1	PHC2
chr1	33927838	33933194	1	.
chr1	33969922	34001784	1	.
chr1	34017431	34022206	1	.
chr1	34028010	34056296	1	.
chr1	34058117	34061767	1	.
chr1	34073214	34087488	1	.
chr1	34091958	34095522	1	.
chr1	34102232	34107671	1	.
chr1	34111682	34126950	1	.
chr1	34129088	34133457	1	.
chr1	34147573	34151450	1	.
chr1	34155813	34164091	1	.
chr1	34193576	34205803	1	.
chr1	34243007	34247821	1	.
chr1	34311947	34318385	1	.
chr1	34371951	34378097	1	.
chr1	34623149	34653705	2	C1orf94,CSMD2
chr1	34696070	34700080	1	.
chr1	34707345	34713102	1	.
chr1	34729163	34734396	1	.
chr1	34815358	34819688	1	.
chr1	34831842	34835144	1	.
chr1	34838132	34847636	1	.
chr1	34902269	34908895	1	.
chr1	34933384	34938216	1	.
chr1	34992511	34999186	1	.
chr1	35096179	35102083	1	.
chr1	35110355	35126342	1	.
chr1	35165830	35173978	1	.
chr1	35178452	35183791	1	.
chr1	35186908	35192086	1	.
chr1	35197832	35212193	1	.
chr1	35231588	35261453	2	GJA4,GJB3
chr1	35327383	35358438	2	.
chr1	35364604	35411157	2	DLGAP3
chr1	35414108	35421493	2	.
chr1	35423738	35433164	2	.
chr1	35435408	35442363	1	.
chr1	35506666	35519619	1	.
chr1	35529050	35533502	1	.
chr1	35536790	35541638	1	.
chr1	36107649	36161032	2	PSMB2
chr1	36168016	36173992	2	.
chr1	36950946	36962326	1	.
chr1	36970580	36973652	1	.
chr1	36974866	36980854	1	.
chr1	36996467	37006628	1	.
chr1	37011108	37023382	2	.
chr1	37026299	37030628	1	.
chr1	37036347	37068150	2	.
chr1	37143216	37147841	1	.
chr1	37151911	37166385	1	.
chr1	37495206	37505420	2	GRIK3
chr1	37507123	37511241	1	.
chr1	37532006	37545183	1	.
chr1	37596345	37601810	1	.
chr1	37698628	37703027	1	.
chr1	37780653	37784436	1	.
chr1	37865065	37868748	1	.
chr1	37905545	37915066	1	.
chr1	38063023	38092557	2	.
chr1	38108104	38145185	2	.
chr1	38186047	38260006	2	EPHA10,MANEAL
chr1	38505500	38511826	2	.
chr1	38512493	38521723	1	POU3F1
chr1	38599720	38603060	2	.
chr1	38767656	38775095	4	.
chr1	38780536	38787679	1	.
chr1	39085521	39091610	1	.
chr1	39151267	39158675	1	.
chr1	39190920	39198489	1	.
chr1	39246188	39253566	1	.
chr1	39259062	39301913	2	.
chr1	40068065	40071483	1	.
chr1	40118751	40123146	1	.
chr1	40134424	40138557	1	NT5C1A
chr1	40145011	40148441	1	.
chr1	40188798	40201045	2	.
chr1	40355604	40370754	1	MYCL
chr1	40570294	40591866	1	.
chr1	40599122	40625127	1	.
chr1	40780240	40786662	2	COL9A2
chr1	41347426	41352059	1	.
chr1	41827375	41831654	1	FOXO6
chr1	41844826	41854087	2	.
chr1	42533475	42543711	1	.
chr1	42887457	42893415	4	.
chr1	43548545	43557176	1	.
chr1	43582725	43592691	1	.
chr1	43595476	43600940	2	.
chr1	43610018	43617458	1	FAM183A
chr1	43640510	43644007	2	.
chr1	43661094	43666913	1	.
chr1	43674479	43691587	1	.
chr1	43810971	43815095	4	.
chr1	43940937	43945579	1	.
chr1	44556496	44562255	1	.
chr1	44573052	44594374	1	KLF17
chr1	44650762	44655741	1	.
chr1	44857518	44896247	2	RNF220
chr1	44910059	44913979	1	.
chr1	44921242	44925866	1	.
chr1	45666656	45671525	1	.
chr1	46906277	46949634	2	.
chr1	46961783	47005483	2	AL136373.1,DMBX1
chr1	47204974	47233980	1	CYP4B1
chr1	47250621	47256536	1	.
chr1	47260670	47266163	1	.
chr1	47268134	47273939	1	.
chr1	47293723	47299484	1	.
chr1	47303925	47309702	1	.
chr1	47311858	47316301	1	.
chr1	47319789	47327761	1	.
chr1	47334968	47343287	1	.
chr1	47393945	47400142	1	.
chr1	47404840	47409586	1	CYP4A11
chr1	47410998	47416162	1	.
chr1	47467671	47472799	1	.
chr1	47485693	47508348	2	CYP4X1
chr1	47511907	47517011	1	.
chr1	47556799	47562477	1	.
chr1	47593539	47603167	1	CYP4A22
chr1	47603912	47607422	1	.
chr1	47610808	47618846	1	.
chr1	47640618	47649711	1	.
chr1	47663642	47686830	1	.
chr1	47687041	47701161	3	TAL1
chr1	47705743	47713273	2	.
chr1	47857379	47861839	1	.
chr1	47864846	47881793	2	FOXE3
chr1	47904181	47915422	3	.
chr1	47922860	47933456	1	.
chr1	47958254	47967206	1	.
chr1	47970550	47978926	2	.
chr1	47985529	47989866	1	.
chr1	47995822	48002893	2	.
chr1	48040151	48062277	2	.
chr1	48149197	48156143	1	.
chr1	48159929	48164613	1	.
chr1	48166618	48179433	2	.
chr1	48185420	48204868	2	.
chr1	48454105	48462314	4	TRABD2B
chr1	48463196	48469146	1	.
chr1	48475523	48487330	1	.
chr1	48549119	48554004	1	.
chr1	48603024	48606595	1	.
chr1	48627541	48632330	1	.
chr1	48641755	48647355	1	.
chr1	50570144	50582577	1	.
chr1	50794157	50798803	1	.
chr1	50829535	50834493	2	.
chr1	50876455	50898075	4	DMRTA2
chr1	51452874	51486929	1	.
chr1	51490650	51495591	1	.
chr1	51502077	51518522	1	.
chr1	51535034	51560026	2	.
chr1	51565266	51590026	1	C1orf185
chr1	51594426	51600014	1	.
chr1	51606038	51616336	1	.
chr1	51622269	51626886	1	.
chr1	51638336	51643505	1	.
chr1	52359020	52366192	1	.
chr1	53031801	53036867	4	.
chr1	53522209	53528254	1	PODN
chr1	53881168	53889580	1	.
chr1	53916379	53920456	1	.
chr1	54203640	54211201	1	GLIS1
chr1	54962853	54968642	1	.
chr1	55004885	55010112	1	ACOT11
chr1	55159145	55164739	1	.
chr1	55166781	55180061	1	.
chr1	55244318	55269932	1	TTC22
chr1	55281368	55286615	1	.
chr1	57105746	57110695	4	PLPP3,PRKAA2
chr1	57883836	57889118	1	.
chr1	58708747	58720321	2	.
chr1	58873836	58878336	1	.
chr1	59031097	59039350	1	.
chr1	59660031	59668855	1	.
chr1	60286236	60303388	4	.
chr1	60307402	60319689	4	.
chr1	60322141	60339787	4	.
chr1	60339787	60344521	1	.
chr1	60382002	60386554	1	.
chr1	61080321	61097334	1	.
chr1	63155408	63164383	4	.
chr1	63243358	63248486	4	.
chr1	63363838	63368075	1	.
chr1	63377774	63385353	1	.
chr1	63387796	63414782	1	.
chr1	63421139	63425986	2	.
chr1	63436813	63447707	1	.
chr1	63454778	63471499	2	.
chr1	63472855	63479386	1	.
chr1	63534452	63545462	2	.
chr1	63547823	63554154	1	.
chr1	63572315	63585732	1	.
chr1	63587897	63594459	1	.
chr1	63614447	63620542	1	.
chr1	63643373	63656797	1	.
chr1	63745291	63750144	1	.
chr1	63758502	63776754	2	.
chr1	63777647	63802128	4	FOXD3
chr1	63807517	63822680	1	.
chr1	65720097	65746952	1	.
chr1	65772055	65784039	1	.
chr1	65880616	65884324	1	.
chr1	66105359	66110556	1	.
chr1	66961706	66969399	1	.
chr1	66996606	67002977	1	SGIP1
chr1	67240044	67245720	1	.
chr1	67554345	67574682	1	.
chr1	67601385	67608424	1	IL23R
chr1	67614507	67619446	1	.
chr1	67700846	67705140	1	.
chr1	67726488	67732639	1	.
chr1	67745840	67750075	1	.
chr1	67766244	67782001	2	IL12RB2
chr1	67782001	67791211	1	.
chr1	68861605	68872170	1	.
chr1	68894866	68902556	1	.
chr1	69021880	69039445	2	.
chr1	69051864	69073923	1	.
chr1	69089392	69098148	1	.
chr1	69102777	69108884	1	.
chr1	69123741	69146424	1	.
chr1	69152918	69160417	1	.
chr1	69166873	69172271	1	.
chr1	69266618	69294310	1	.
chr1	69310038	69316406	1	.
chr1	69351062	69357418	1	.
chr1	69520314	69531840	1	.
chr1	69543928	69550119	2	.
chr1	69721756	69727898	1	.
chr1	69815200	69821230	1	.
chr1	69885858	69895323	1	.
chr1	69975514	69982114	1	.
chr1	69985150	69992052	1	.
chr1	70016383	70026330	1	.
chr1	70039075	70042285	1	.
chr1	70054040	70060717	1	.
chr1	70072299	70082740	1	.
chr1	70084097	70092715	1	.
chr1	70102695	70108363	1	.
chr1	70121343	70127578	1	.
chr1	70186862	70191753	1	.
chr1	70200251	70211911	1	.
chr1	70223300	70235608	1	.
chr1	70237206	70242726	2	.
chr1	70247181	70253350	2	.
chr1	70257425	70261708	1	.
chr1	70264452	70275564	1	.
chr1	70298378	70304106	1	.
chr1	70306949	70313599	1	.
chr1	70315306	70320643	1	.
chr1	70335165	70347141	2	.
chr1	70402343	70408638	1	.
chr1	70412811	70418206	1	.
chr1	70442659	70455963	1	.
chr1	70463498	70468949	1	.
chr1	70476533	70493907	1	.
chr1	70515484	70531738	1	.
chr1	70537684	70548455	2	.
chr1	70553042	70562833	1	.
chr1	70564430	70579807	1	.
chr1	70581196	70589768	2	.
chr1	75591224	75610035	4	LHX8
chr1	75610035	75614587	1	.
chr1	76451905	76457762	1	.
chr1	77330715	77334516	1	ST6GALNAC5
chr1	77743399	77751870	1	AK5
chr1	78508641	78514971	4	.
chr1	78953336	78962482	1	.
chr1	81691767	81709977	4	.
chr1	82268933	82287994	4	.
chr1	82294776	82305404	1	.
chr1	82311713	82317682	1	.
chr1	82387197	82411990	4	.
chr1	82411990	82423124	4	.
chr1	85163749	85174093	4	.
chr1	85268127	85289835	1	.
chr1	85305435	85311654	1	.
chr1	85340682	85363949	2	LPAR3
chr1	85375318	85380731	2	.
chr1	85397916	85411404	1	.
chr1	85414579	85429501	1	.
chr1	85468629	85473971	1	.
chr1	85482118	85492331	1	.
chr1	85493579	85504592	1	.
chr1	85518662	85535319	2	.
chr1	85538539	85565396	2	.
chr1	85566757	85594437	1	.
chr1	85608475	85635525	1	.
chr1	85643790	85652281	2	.
chr1	85659445	85673990	3	SYDE2
chr1	85674203	85684282	2	.
chr1	85694232	85705216	1	.
chr1	85923235	85934162	1	.
chr1	85989383	86005700	3	.
chr1	86037833	86051818	2	CYR61,DDAH1
chr1	86191606	86212089	1	.
chr1	86229481	86234197	1	.
chr1	86299826	86303952	1	.
chr1	86308481	86324752	1	.
chr1	86352035	86364340	1	.
chr1	86608165	86613992	1	.
chr1	86617699	86627297	2	COL24A1
chr1	86638752	86643041	1	.
chr1	86649833	86654449	1	.
chr1	86766052	86779429	1	.
chr1	86886508	86893230	1	CLCA2
chr1	87028631	87038503	1	.
chr1	87042093	87045646	1	.
chr1	87053324	87060140	1	.
chr1	87156755	87164645	2	.
chr1	87636138	87641509	1	.
chr1	87795087	87801060	1	.
chr1	88923535	88932476	2	.
chr1	89464599	89468298	1	.
chr1	90569143	90579707	1	.
chr1	91145457	91168697	2	.
chr1	91169131	91207014	3	BARHL2
chr1	91208327	91231491	2	.
chr1	91245213	91249145	1	.
chr1	91256664	91271908	1	.
chr1	91291860	91312892	2	.
chr1	91316785	91323696	1	.
chr1	92936743	92957174	4	GFI1
chr1	93433734	93439719	4	.
chr1	93903344	93911007	4	.
chr1	94693626	94706083	4	.
chr1	94709942	94716866	4	.
chr1	94872805	94882387	1	.
chr1	95001175	95014434	4	F3
chr1	95281751	95292475	4	SLC44A3
chr1	95541978	95549767	2	.
chr1	95844636	95850525	1	.
chr1	95870788	95878161	2	.
chr1	95905375	95910161	1	.
chr1	95973417	95982052	1	.
chr1	96042419	96046857	1	.
chr1	96069187	96075524	1	.
chr1	99255108	99265128	1	.
chr1	99267202	99272552	1	.
chr1	99277343	99285598	1	.
chr1	99294746	99302526	1	.
chr1	99304435	99324097	1	.
chr1	99334491	99341719	1	.
chr1	99368923	99376595	1	.
chr1	99438128	99443203	1	.
chr1	99450080	99456167	1	.
chr1	99459184	99476995	2	PLPPR5
chr1	99481566	99490526	1	.
chr1	99525705	99543427	1	.
chr1	99631046	99644021	1	.
chr1	99726649	99734311	2	PLPPR4
chr1	100999210	101012518	2	GPR88
chr1	101119821	101124838	1	.
chr1	101566260	101574258	1	.
chr1	101580319	101589210	1	.
chr1	101593126	101597995	1	.
chr1	101601024	101609336	1	.
chr1	101643873	101652368	1	.
chr1	101674323	101685402	1	.
chr1	101689454	101718035	2	S1PR1
chr1	101724889	101732292	1	.
chr1	101739419	101749901	1	.
chr1	101881804	101886918	1	.
chr1	101974649	101987709	1	.
chr1	101997919	102003235	1	.
chr1	102012408	102017508	1	.
chr1	102038001	102043651	1	.
chr1	102145841	102150676	1	.
chr1	102151762	102156884	1	.
chr1	102185880	102193612	1	.
chr1	102258831	102265388	1	.
chr1	102291564	102300299	1	.
chr1	102310265	102315778	1	.
chr1	102318794	102324133	1	.
chr1	102377374	102387266	1	.
chr1	102423039	102444456	1	.
chr1	102449905	102464560	1	OLFM3
chr1	102496783	102501604	1	.
chr1	102567524	102572991	1	.
chr1	102658402	102663007	1	.
chr1	102710172	102719472	1	.
chr1	102741944	102745756	1	.
chr1	103042449	103047301	1	.
chr1	103442875	103451465	1	.
chr1	103535428	103543406	1	.
chr1	103568817	103578883	2	COL11A1
chr1	103611551	103617271	1	.
chr1	103707983	103715274	1	.
chr1	103718512	103725221	1	.
chr1	103759868	103773574	1	.
chr1	104006968	104018665	1	.
chr1	104045839	104051138	1	.
chr1	104102070	104107880	1	.
chr1	104121793	104131151	1	.
chr1	104132252	104143698	1	.
chr1	104146071	104178374	1	AMY2A
chr1	104181200	104217585	2	AMY1A
chr1	104226661	104311483	1	AMY1B,AMY1C
chr1	104331405	104338211	1	.
chr1	104350077	104356783	1	.
chr1	104444745	104454784	1	.
chr1	104474637	104480809	1	.
chr1	104485847	104492382	1	.
chr1	104504706	104510758	1	.
chr1	104540293	104547161	1	.
chr1	104554502	104559510	1	.
chr1	104563413	104575091	1	.
chr1	104585260	104590382	1	.
chr1	104604447	104610601	1	.
chr1	104631526	104651123	1	.
chr1	104708806	104713078	1	.
chr1	104725211	104732377	1	.
chr1	104750887	104757039	1	.
chr1	104777174	104780693	1	.
chr1	104838303	104843061	1	.
chr1	104890133	104910897	1	.
chr1	104951096	104961751	1	.
chr1	104965235	104972118	1	.
chr1	105005228	105014045	1	.
chr1	105021147	105025501	1	.
chr1	105052170	105057765	1	.
chr1	105174238	105180030	1	.
chr1	105253686	105257642	1	.
chr1	105300946	105306761	1	.
chr1	105308743	105312765	1	.
chr1	105433484	105439032	2	.
chr1	105489146	105502725	1	.
chr1	105511061	105514840	1	.
chr1	105553143	105565184	1	.
chr1	105630125	105636083	1	.
chr1	105665725	105672205	1	.
chr1	105674338	105694889	1	.
chr1	105735452	105740007	1	.
chr1	105751254	105756821	1	.
chr1	105927965	105933504	1	.
chr1	105946485	105952046	1	.
chr1	105995183	106001685	1	.
chr1	106005956	106016020	1	.
chr1	106036733	106041998	1	.
chr1	106057003	106061286	1	.
chr1	106070952	106076217	1	.
chr1	106233276	106239463	1	.
chr1	106240750	106247790	1	.
chr1	106248309	106254834	1	.
chr1	106273455	106287777	1	.
chr1	106334031	106338081	1	.
chr1	106370420	106377974	1	.
chr1	106381116	106388834	1	.
chr1	106391799	106397396	1	.
chr1	106407820	106416112	1	.
chr1	106424283	106434038	1	.
chr1	106454665	106481439	1	.
chr1	106497911	106502798	1	.
chr1	106505932	106512866	1	.
chr1	106531669	106554506	1	.
chr1	106682821	106689932	1	.
chr1	106762502	106776020	1	.
chr1	106831641	106841035	1	.
chr1	106867315	106871915	1	.
chr1	106906804	106913725	1	.
chr1	106916706	106926510	1	.
chr1	106930974	106938953	1	.
chr1	106945410	106949044	1	.
chr1	107026436	107032023	1	.
chr1	107678946	107683799	1	NTNG1
chr1	107861569	107876370	1	.
chr1	107912374	107917880	1	.
chr1	108021341	108026813	1	.
chr1	108497070	108512031	1	VAV3
chr1	108660533	108665170	1	.
chr1	108757219	108761943	2	.
chr1	108774806	108795352	2	NBPF4
chr1	108799289	108821669	1	.
chr1	108842532	108858680	1	.
chr1	108872454	108886778	1	.
chr1	108908662	108928028	2	.
chr1	108960150	108979067	1	.
chr1	108991975	109004146	1	NBPF6
chr1	109009240	109018680	1	.
chr1	109039895	109053240	1	.
chr1	109059004	109064265	1	.
chr1	109197164	109207509	1	HENMT1
chr1	109223306	109228581	1	.
chr1	109652201	109661547	1	C1orf194,KIAA1324
chr1	109980707	110000423	2	.
chr1	110003230	110019995	3	SYPL2
chr1	110020200	110026025	1	ATXN7L2
chr1	110053014	110066902	4	.
chr1	110631204	110645168	1	.
chr1	110649654	110662390	2	UBL4B
chr1	110683656	110714424	2	SLC6A17
chr1	110963634	110989719	1	.
chr1	110996668	110999762	1	.
chr1	111005539	111010698	1	.
chr1	111019284	111030836	1	.
chr1	111038176	111042977	1	.
chr1	111061689	111068525	1	KCNA10
chr1	111074705	111084077	1	.
chr1	111090604	111101660	2	.
chr1	111103932	111114118	1	.
chr1	111153415	111156813	1	.
chr1	111174182	111201617	1	KCNA2
chr1	111220692	111228298	1	.
chr1	111252659	111264445	1	.
chr1	111265311	111277103	1	.
chr1	111291054	111298709	1	.
chr1	111300409	111305188	1	.
chr1	111307162	111312454	1	.
chr1	111316497	111320657	1	.
chr1	111327983	111338020	1	.
chr1	111355058	111360628	1	.
chr1	111388781	111401271	2	.
chr1	111410664	111427993	1	CD53
chr1	111429961	111441045	1	.
chr1	111458063	111463578	1	.
chr1	111513741	111519686	1	.
chr1	111525936	111544192	1	.
chr1	111564286	111572549	1	.
chr1	111624077	111634800	1	.
chr1	111736968	111755747	1	CHI3L2,DENND2D
chr1	111810134	111816034	1	.
chr1	111859187	111866148	1	.
chr1	111944599	111953321	2	.
chr1	111971260	111976784	1	.
chr1	112035606	112040031	1	.
chr1	112055350	112060762	1	.
chr1	112085548	112092150	1	.
chr1	112112169	112119469	1	.
chr1	112126631	112132574	2	.
chr1	112137127	112141600	1	.
chr1	112805236	112811026	1	.
chr1	112848041	112871116	1	.
chr1	112876946	112881924	1	.
chr1	112913140	112928037	1	.
chr1	112929407	112933625	1	.
chr1	113039361	113055697	2	.
chr1	113255461	113265445	1	FAM19A3,PPM1J
chr1	113280251	113294037	1	.
chr1	113299373	113307444	1	.
chr1	113308951	113315235	1	.
chr1	113346360	113351033	1	.
chr1	114370558	114384116	1	.
chr1	114413769	114420055	1	PTPN22
chr1	114462893	114468398	1	.
chr1	114539260	114544269	1	.
chr1	114549005	114554060	1	.
chr1	114567244	114578995	1	.
chr1	114581902	114589546	1	.
chr1	114592004	114603650	1	.
chr1	114629958	114638605	1	.
chr1	114640388	114646687	1	.
chr1	114657434	114662449	1	.
chr1	114676467	114681906	1	.
chr1	114702811	114711404	1	.
chr1	114714076	114721558	1	.
chr1	114740059	114747595	1	.
chr1	114754079	114767272	1	.
chr1	114774982	114782422	1	.
chr1	114800715	114809422	1	.
chr1	114810633	114835010	1	.
chr1	114836232	114847775	2	.
chr1	114858891	114884001	1	.
chr1	114886969	114892089	1	.
chr1	115081124	115085990	1	.
chr1	115126271	115246473	2	AMPD1,DENND2C
chr1	115324199	115366670	2	.
chr1	115368706	115381427	2	.
chr1	115401804	115407420	2	.
chr1	115411530	115430477	2	.
chr1	115432676	115450466	1	.
chr1	115450466	115461211	1	.
chr1	115483843	115493620	1	.
chr1	115536113	115543383	1	.
chr1	115577530	115582561	1	.
chr1	115584174	115601391	1	.
chr1	115611447	115637768	2	TSPAN2
chr1	115639053	115646094	1	.
chr1	115822943	115828796	1	.
chr1	115873669	115886164	2	NGF
chr1	116019899	116026563	1	.
chr1	116047132	116053890	1	.
chr1	116085092	116089378	1	.
chr1	116145801	116156316	1	.
chr1	116171009	116175728	1	.
chr1	116249220	116254449	1	.
chr1	116294698	116299061	1	.
chr1	116315359	116319432	1	.
chr1	116332675	116337987	1	.
chr1	116363839	116376672	2	.
chr1	116409085	116415932	1	.
chr1	116507376	116524896	2	SLC22A15
chr1	116550075	116557038	1	.
chr1	116607200	116610818	1	.
chr1	116663190	116671220	1	.
chr1	117113041	117118020	1	CD58
chr1	117145496	117151833	1	.
chr1	117206777	117210054	1	IGSF3
chr1	117373991	117378590	1	.
chr1	117443898	117465587	2	PTGFRN
chr1	117863321	117868819	1	.
chr1	118084312	118090556	1	.
chr1	118142682	118163514	1	FAM46C
chr1	118173496	118176797	1	.
chr1	118232679	118236421	1	.
chr1	118291770	118297966	1	.
chr1	118323921	118329764	1	.
chr1	118335625	118343738	4	.
chr1	118346648	118355173	4	.
chr1	118376135	118380836	1	.
chr1	118523227	118530011	1	.
chr1	119515573	119553818	4	TBX15
chr1	120025982	120031804	1	.
chr1	120170717	120179155	1	.
chr1	120191997	120204742	2	.
chr1	120204742	120210400	1	.
chr1	120211914	120218762	1	.
chr1	120351807	120355843	1	REG4
chr1	120404354	120410638	1	.
chr1	120612478	120618064	4	NOTCH2
chr1	120627124	120630416	1	.
chr1	120661196	120666844	1	.
chr1	120866091	120873606	1	.
chr1	120881270	120892771	1	.
chr1	120900242	120910897	2	.
chr1	120919649	120936690	2	.
chr1	121258072	121263740	1	.
chr1	121372572	121378948	1	.
chr1	142577018	142606278	1	.
chr1	142634471	142657246	2	.
chr1	142709644	142720597	4	.
chr1	142781033	142800489	1	.
chr1	142854362	142861657	2	.
chr1	142909902	142930060	2	.
chr1	143134407	143139402	1	.
chr1	143148126	143153655	1	.
chr1	143251777	143264119	1	.
chr1	143265605	143275132	2	.
chr1	143433400	143456672	1	.
chr1	143481054	143504173	1	.
chr1	143654253	143663522	1	.
chr1	143664651	143675664	1	.
chr1	143680298	143690110	2	.
chr1	143726570	143751991	3	.
chr1	143754681	143768299	2	.
chr1	143871008	143890774	1	.
chr1	144298690	144304123	2	.
chr1	144306843	144322966	1	.
chr1	144322966	144339755	2	.
chr1	144339755	144350524	2	.
chr1	144353277	144381695	2	.
chr1	144383037	144401719	2	.
chr1	144478919	144484074	2	.
chr1	144486772	144503554	1	.
chr1	144503554	144520396	3	.
chr1	144534752	144545777	2	.
chr1	144545777	144565158	1	.
chr1	144572581	144596772	1	.
chr1	144673810	144685555	1	.
chr1	144706322	144710000	1	.
chr1	144831364	144865408	1	PDE4DIP
chr1	144878615	144896419	1	.
chr1	144931854	144960835	1	.
chr1	144962937	144967111	1	.
chr1	144970833	144975718	1	.
chr1	144979176	144990747	1	.
chr1	144993877	145010357	1	.
chr1	145012226	145027078	1	.
chr1	145027078	145037824	2	.
chr1	145054159	145063377	1	.
chr1	145069262	145092953	3	.
chr1	145097097	145126051	4	.
chr1	145126051	145132911	1	.
chr1	145135528	145150688	1	NUDT4P1
chr1	145156620	145162305	1	.
chr1	145186818	145195690	1	.
chr1	145369278	145382870	1	.
chr1	145611314	145625881	2	RNF115
chr1	145948084	145963657	2	.
chr1	145989615	146012093	2	.
chr1	146017829	146028245	2	.
chr1	146082093	146090059	1	.
chr1	146093455	146107872	1	.
chr1	146122326	146127356	1	.
chr1	146138759	146152527	1	.
chr1	146317080	146327889	1	.
chr1	146350168	146354557	1	.
chr1	146361951	146371873	1	.
chr1	146470244	146481921	1	.
chr1	146483781	146532780	2	.
chr1	146542220	146556619	3	.
chr1	146559285	146572592	2	.
chr1	146577695	146581887	1	.
chr1	146590372	146596638	1	.
chr1	146599259	146619172	2	.
chr1	146646903	146658689	1	.
chr1	146690760	146699639	2	.
chr1	146799308	146818041	1	.
chr1	146820788	146829953	2	.
chr1	146835201	146840560	1	.
chr1	146853318	146861638	1	.
chr1	146868029	146874032	2	.
chr1	146883954	146895817	1	.
chr1	146902884	146914138	1	.
chr1	146932636	146939665	1	.
chr1	146952737	146957213	1	.
chr1	147195041	147204634	2	.
chr1	147221390	147226214	1	.
chr1	147232464	147260585	1	GJA5
chr1	147334485	147338902	1	.
chr1	147380669	147395406	1	.
chr1	147499946	147511444	3	.
chr1	147518175	147529621	2	.
chr1	147531555	147553349	2	.
chr1	147559587	147569068	2	.
chr1	147626082	147633339	1	.
chr1	147635431	147648706	1	.
chr1	147678806	147693582	1	.
chr1	147697611	147731995	2	.
chr1	147737078	147744907	1	.
chr1	147747046	147801365	1	.
chr1	147811016	147816369	1	.
chr1	147819373	147834800	1	.
chr1	147842517	147850881	1	.
chr1	147856867	147865895	1	.
chr1	147870955	147877246	2	.
chr1	147913958	147931565	3	.
chr1	147931565	147973100	2	.
chr1	147974208	148002168	2	.
chr1	148176620	148200043	2	.
chr1	148224256	148238684	2	.
chr1	148238684	148249627	2	.
chr1	148511357	148525535	2	.
chr1	148532367	148547548	2	.
chr1	148553269	148560486	1	NBPF15
chr1	148596840	148607307	2	.
chr1	148607307	148617982	2	.
chr1	148659857	148675447	2	.
chr1	148675447	148684138	2	.
chr1	148758815	148771911	2	.
chr1	148771911	148784154	2	.
chr1	148784154	148787938	2	.
chr1	148821293	148835329	2	.
chr1	148835329	148848270	2	.
chr1	148850383	148868546	3	.
chr1	148868546	148907011	3	.
chr1	148907011	148919435	2	.
chr1	148927610	148954463	2	.
chr1	149011812	149022342	2	.
chr1	149022342	149031125	1	.
chr1	149058678	149062596	1	.
chr1	149064739	149069647	1	.
chr1	149107553	149113131	1	.
chr1	149133923	149196943	2	.
chr1	149201119	149243856	2	.
chr1	149250257	149331407	1	.
chr1	149340223	149360544	1	.
chr1	149372184	149386418	2	.
chr1	149387772	149391852	1	.
chr1	149394173	149404283	2	HIST2H3PS2
chr1	149430086	149445241	1	.
chr1	149509657	149534423	2	.
chr1	149535632	149577429	2	.
chr1	149577429	149594561	2	.
chr1	149594561	149609093	1	.
chr1	149613282	149619118	2	.
chr1	149648126	149676186	1	.
chr1	149679401	149716035	1	.
chr1	149731110	149745940	2	.
chr1	149755755	149771712	2	.
chr1	149780045	149788359	2	HIST2H2BF,HIST2H3D
chr1	150681634	150686557	4	.
chr1	150851272	150858198	4	.
chr1	151435581	151439303	1	.
chr1	151679478	151706657	2	CELF3,RIIAD1
chr1	151769470	151773333	1	.
chr1	151774489	151781537	1	LINGO4
chr1	151821366	151826828	1	THEM5
chr1	151886173	151893244	1	.
chr1	151896411	151905592	1	.
chr1	151969253	151985013	2	.
chr1	151987399	152001245	2	.
chr1	152005705	152019110	1	.
chr1	152033844	152045920	2	.
chr1	152051134	152074774	2	TCHHL1
chr1	152074774	152090627	2	TCHH
chr1	152090627	152104174	2	.
chr1	152105474	152110131	1	.
chr1	152112053	152116972	1	.
chr1	152121881	152128145	1	.
chr1	152128691	152147205	1	RPTN
chr1	152150743	152168697	1	.
chr1	152170363	152174360	1	.
chr1	152290638	152299568	1	FLG
chr1	152311781	152318961	1	.
chr1	152343372	152353438	1	.
chr1	152377885	152382709	1	.
chr1	152387257	152392527	1	.
chr1	152409338	152413587	1	.
chr1	152473583	152498968	2	CRCT1,LCE5A
chr1	152504505	152510390	1	.
chr1	152549543	152555991	1	LCE3D
chr1	152570766	152576226	1	LCE3C
chr1	152592983	152597842	1	LCE3A
chr1	152622770	152638572	1	LCE2D
chr1	152639813	152661792	1	LCE2B,LCE2C
chr1	152669910	152682162	1	LCE2A,LCE4A
chr1	152690354	152700482	1	C1orf68
chr1	152707984	152713375	1	.
chr1	152724540	152732185	1	KPRP
chr1	152749709	152761807	1	LCE1E
chr1	152770094	152777705	1	.
chr1	152780485	152805411	1	LCE1A,LCE1B
chr1	152844889	152851002	1	SMCP
chr1	152859821	152873021	1	.
chr1	152875404	152882261	1	IVL
chr1	152883846	152894362	2	.
chr1	152917555	152925311	1	SPRR5
chr1	152937247	152941421	1	.
chr1	152958808	152967356	1	.
chr1	152969415	152974482	1	SPRR3
chr1	153014250	153043304	2	SPRR2A,SPRR2B,SPRR2D
chr1	153057468	153063494	1	.
chr1	153068846	153074538	1	.
chr1	153088778	153094332	1	.
chr1	153098875	153130246	2	SPRR2G
chr1	153134881	153152112	1	.
chr1	153159333	153163646	1	.
chr1	153169987	153184208	1	LELP1
chr1	153190194	153205525	1	PRR9
chr1	153207866	153212866	1	.
chr1	153230686	153241950	2	LOR
chr1	153241950	153291733	2	PGLYRP3
chr1	153295307	153383471	2	PGLYRP4,S100A12,S100A8,S100A9
chr1	153385120	153392890	1	S100A7A
chr1	153394646	153414750	2	S100A7L2
chr1	153415865	153426096	2	.
chr1	153428684	153462126	2	S100A7
chr1	153466795	153475246	2	.
chr1	153650087	153654990	1	NPR1
chr1	153999588	154003926	1	.
chr1	154026805	154038257	1	.
chr1	154162030	154168713	1	TPM3
chr1	154260541	154265058	1	.
chr1	154283876	154296890	2	AQP10
chr1	154374856	154381187	1	IL6R
chr1	154461296	154479000	3	SHE,TDRD10
chr1	154479000	154492151	2	.
chr1	154492151	154499179	2	.
chr1	154504203	154519309	2	.
chr1	154537223	154544234	2	CHRNB2
chr1	154610806	154617908	1	.
chr1	154623567	154634478	2	.
chr1	154731889	154738911	1	.
chr1	155050530	155057249	2	EFNA3
chr1	155094076	155098179	4	.
chr1	155112730	155125573	2	DPM3
chr1	156316049	156348744	2	CCT3,RHBG
chr1	156354423	156364228	2	.
chr1	156366575	156384481	2	.
chr1	156384481	156415249	3	C1orf61
chr1	156415249	156423110	1	.
chr1	156543538	156546561	2	.
chr1	156577370	156598010	2	HAPLN2
chr1	156603916	156615035	1	BCAN
chr1	156647198	156655657	1	NES
chr1	156785804	156810538	2	NTRK1,SH2D2A
chr1	156823908	156887647	2	INSRR,PEAR1
chr1	156895651	156902703	2	.
chr1	157027125	157034668	1	.
chr1	157035851	157044781	1	.
chr1	157048436	157060561	1	.
chr1	157071839	157086148	2	.
chr1	157108067	157211924	2	ETV3
chr1	157233117	157254006	2	.
chr1	157258604	157287296	1	.
chr1	157292497	157310512	1	.
chr1	157320734	157338667	1	.
chr1	157341497	157377915	2	.
chr1	157384264	157389744	1	.
chr1	157395364	157407510	2	.
chr1	157410668	157427248	1	.
chr1	157436206	157443948	1	.
chr1	157452959	157458820	1	.
chr1	157459965	157476594	1	.
chr1	157506828	157517456	1	.
chr1	157520414	157525181	1	FCRL5
chr1	157566016	157575728	1	FCRL4
chr1	157587408	157593736	1	.
chr1	157595660	157604151	1	.
chr1	157625677	157631317	1	.
chr1	157667168	157672795	2	FCRL3
chr1	157808503	157814250	1	.
chr1	157893342	157899265	1	.
chr1	157928968	157935350	1	.
chr1	157957968	157967243	1	KIRREL1
chr1	158071512	158075574	1	.
chr1	158081175	158093929	1	.
chr1	158095582	158101224	1	.
chr1	158121412	158134506	1	.
chr1	158154092	158171671	2	.
chr1	158171671	158177004	2	.
chr1	158198487	158204268	1	.
chr1	158212546	158217934	1	.
chr1	158258517	158263272	1	CD1C
chr1	158270885	158274280	1	.
chr1	158323101	158328349	1	CD1E
chr1	158464705	158469678	1	.
chr1	158487296	158491001	1	.
chr1	158503312	158508624	1	.
chr1	158521526	158528469	1	OR6Y1
chr1	158540150	158544389	1	OR6P1
chr1	158619922	158633602	1	.
chr1	158635693	158640675	1	.
chr1	158645044	158651613	1	.
chr1	158665652	158673098	1	OR6K2
chr1	158679379	158686522	1	.
chr1	158687702	158696593	1	OR6K3
chr1	158712166	158717918	1	.
chr1	158721858	158725112	1	OR6K6
chr1	158764926	158777166	1	.
chr1	158847190	158855141	1	.
chr1	158863841	158867522	1	.
chr1	158895374	158900521	1	PYHIN1
chr1	158968191	158972840	1	IFI16
chr1	158977690	158982390	1	.
chr1	159028290	159035905	1	.
chr1	159042823	159054303	1	.
chr1	159062859	159070893	1	.
chr1	159090568	159115446	2	.
chr1	159140999	159167234	2	CADM3
chr1	159170977	159181559	2	ACKR1
chr1	159182799	159191888	1	.
chr1	159193837	159199225	1	.
chr1	159249012	159253555	2	.
chr1	159263247	159273013	1	.
chr1	159276585	159284313	1	OR10J3
chr1	159286091	159290519	1	.
chr1	159325580	159337073	2	.
chr1	159392354	159416007	1	OR10J1
chr1	159434231	159446493	2	.
chr1	159461201	159467346	1	.
chr1	159470275	159476512	1	.
chr1	159499088	159506522	1	OR10J5
chr1	159547782	159557504	1	APCS
chr1	159562223	159567133	1	.
chr1	159583499	159593438	1	.
chr1	159606124	159613244	1	.
chr1	159613738	159670514	2	.
chr1	159724469	159729494	1	.
chr1	159732566	159740365	1	.
chr1	159742652	159747079	1	.
chr1	159821672	159825858	1	SNHG28
chr1	159918202	159975373	2	SLAMF9
chr1	159976349	159992139	2	.
chr1	160014959	160053519	2	KCNJ10,KCNJ9
chr1	160343267	160355637	1	.
chr1	160357292	160363521	1	.
chr1	160402758	160445213	2	.
chr1	160446552	160459930	2	.
chr1	160460939	160468846	1	.
chr1	160482607	160486771	1	.
chr1	160495565	160501157	1	.
chr1	160516182	160521455	1	.
chr1	160522395	160538844	1	.
chr1	160554577	160561283	1	.
chr1	160576041	160588064	2	.
chr1	160590062	160629530	1	SLAMF1
chr1	160630849	160635691	1	.
chr1	160639961	160662198	2	.
chr1	160668443	160700345	2	CD48
chr1	160706799	160724072	1	SLAMF7
chr1	160738053	160745409	1	.
chr1	160761435	160767337	1	LY9
chr1	160772379	160776468	1	.
chr1	160777451	160785056	1	.
chr1	160785317	160796577	1	.
chr1	160804380	160821613	1	.
chr1	160829875	160845661	1	CD244
chr1	160873337	160888198	1	.
chr1	160898146	160902328	1	.
chr1	160912687	160937949	2	ITLN2
chr1	160939388	160973235	2	.
chr1	160993003	160997449	2	.
chr1	161000455	161003768	1	.
chr1	161022817	161042614	2	ARHGAP30
chr1	161048655	161055173	1	.
chr1	161058515	161064237	1	NECTIN4
chr1	161215349	161252196	2	PCP4L1
chr1	161256292	161260797	2	.
chr1	161271916	161282410	2	MPZ
chr1	161395791	161448927	2	.
chr1	161450272	161455803	1	.
chr1	161456303	161477553	1	FCGR2A
chr1	161481571	161493413	1	.
chr1	161494597	161509292	1	HSPA6
chr1	161524653	161545047	4	.
chr1	161547700	161557332	1	.
chr1	161561790	161569557	1	.
chr1	161581126	161585519	1	.
chr1	161594858	161599096	4	.
chr1	161611517	161626947	4	.
chr1	161626947	161633234	1	FCGR2B
chr1	161635213	161650201	1	.
chr1	161650201	161662911	2	.
chr1	161662911	161697914	1	FCRLA,FCRLB
chr1	161697914	161711014	2	.
chr1	161711014	161716524	1	.
chr1	161970509	161975261	1	.
chr1	161990001	162003355	1	OLFML2B
chr1	162406813	162418972	1	.
chr1	162437186	162442481	1	.
chr1	162450563	162464492	2	.
chr1	163336084	163356059	1	.
chr1	163388474	163392821	1	.
chr1	163407091	163412532	1	.
chr1	163416983	163423693	1	.
chr1	164395310	164398312	1	.
chr1	164398350	164404506	1	.
chr1	164409294	164413348	1	.
chr1	165078274	165097818	1	.
chr1	165100642	165111325	1	.
chr1	165187151	165191855	1	.
chr1	165199979	165211281	2	.
chr1	165251438	165259706	1	.
chr1	165265913	165272965	1	.
chr1	165318281	165329023	3	LMX1A
chr1	165329213	165333881	1	.
chr1	165339765	165351929	1	.
chr1	165362294	165371487	1	.
chr1	165431164	165436653	1	.
chr1	165507918	165515815	1	LRRC52
chr1	165526103	165533815	1	.
chr1	165537279	165549245	1	.
chr1	165574286	165584271	1	.
chr1	165589960	165596199	1	.
chr1	166127867	166141449	2	FAM78B
chr1	166147812	166161080	1	.
chr1	166288655	166305390	1	.
chr1	166339040	166343565	1	.
chr1	166386790	166392162	1	.
chr1	166447719	166459713	1	.
chr1	166485007	166495134	1	.
chr1	166523259	166539954	1	.
chr1	166546649	166559285	1	.
chr1	166568397	166578610	1	.
chr1	166587423	166606400	1	.
chr1	166648247	166653860	1	.
chr1	166655470	166661545	1	.
chr1	166667076	166677326	1	.
chr1	166701658	166708534	1	.
chr1	166726916	166731025	1	.
chr1	166733134	166739620	1	.
chr1	166742087	166747036	1	.
chr1	166748621	166769045	2	.
chr1	166770569	166792221	1	.
chr1	166800085	166806415	1	.
chr1	167562108	167565680	1	.
chr1	167591251	167604165	2	RCSD1
chr1	168106240	168114695	4	GPR161
chr1	168479348	168490354	1	.
chr1	168501186	168506787	1	.
chr1	168542798	168551019	1	XCL1
chr1	169558875	169562860	1	.
chr1	169866052	169873452	4	.
chr1	170589255	170594963	4	.
chr1	170612051	170619628	4	.
chr1	171811311	171817463	1	.
chr1	172454428	172460171	4	.
chr1	172485646	172500326	4	.
chr1	172704858	172711389	1	.
chr1	173655265	173661058	1	.
chr1	175032053	175040981	4	TNN
chr1	175120919	175125490	1	.
chr1	175153563	175164982	1	KIAA0040
chr1	175166869	175172700	1	.
chr1	175276436	175285248	2	.
chr1	175319519	175324018	1	.
chr1	175429318	175434851	1	.
chr1	175701150	175708017	1	.
chr1	175709754	175714827	1	TNR
chr1	175721505	175726768	1	.
chr1	175824513	175831839	1	.
chr1	176323424	176328662	1	.
chr1	176340341	176344978	1	.
chr1	176381658	176386019	1	.
chr1	176423667	176427640	1	.
chr1	176517582	176525850	2	.
chr1	176870160	176876699	1	.
chr1	177131813	177142469	2	ASTN1,BRINP2
chr1	177977922	177982712	1	.
chr1	178505316	178511050	1	.
chr1	178549841	178553202	1	.
chr1	178555700	178561349	1	.
chr1	178617725	178624058	1	.
chr1	178690366	178711147	2	RALGPS2
chr1	178719425	178723306	1	.
chr1	178738935	178746187	1	.
chr1	178749002	178759230	1	.
chr1	178759947	178770053	2	.
chr1	178774355	178785780	1	.
chr1	178792139	178796951	1	.
chr1	178798990	178804024	1	.
chr1	178816274	178865568	2	ANGPTL1
chr1	178868691	178876035	1	.
chr1	178883162	178892708	1	.
chr1	178903525	178927753	1	.
chr1	179336397	179344095	1	.
chr1	179383999	179387384	1	.
chr1	179395868	179401637	1	.
chr1	179404267	179421760	2	.
chr1	179424720	179429200	1	.
chr1	179472310	179480511	1	.
chr1	179508699	179513525	1	.
chr1	179516120	179522648	1	.
chr1	179547857	179569831	2	TDRD5
chr1	179583068	179589261	1	.
chr1	179595165	179611436	1	.
chr1	179631999	179638251	1	.
chr1	179658309	179663928	1	.
chr1	179669896	179674173	1	.
chr1	179674691	179679468	1	.
chr1	179694483	179724296	2	FAM163A
chr1	179728542	179735058	2	.
chr1	179745221	179755505	1	.
chr1	179765812	179773115	1	.
chr1	180191120	180213796	3	LHX4
chr1	181290203	181293568	1	.
chr1	181431251	181463607	1	.
chr1	181509147	181517664	1	.
chr1	181603465	181610885	1	.
chr1	181612755	181617863	1	.
chr1	181643561	181649880	1	.
chr1	181666438	181671207	1	.
chr1	181765905	181770142	1	.
chr1	181870589	181877728	2	.
chr1	181990778	181996427	1	.
chr1	182396186	182400889	1	.
chr1	182417481	182430028	1	.
chr1	182448707	182454728	1	.
chr1	182483771	182493311	1	.
chr1	182497911	182503838	1	.
chr1	182507741	182512714	1	.
chr1	182529706	182537188	1	.
chr1	182541070	182545022	1	.
chr1	182551810	182560666	1	RNASEL
chr1	182570631	182579571	1	RGS16
chr1	182591852	182599177	1	.
chr1	182618693	182658927	1	RGS8
chr1	182697297	182704717	1	.
chr1	182728533	182734939	1	.
chr1	182742249	182772254	2	NPL
chr1	182781805	182805211	1	.
chr1	182895650	182901297	1	.
chr1	182936650	182945568	4	.
chr1	183419673	183433010	4	.
chr1	184937879	184947161	4	FAM129A
chr1	185565246	185571151	1	.
chr1	185640866	185646073	1	.
chr1	186191594	186198100	1	.
chr1	197214841	197262704	4	CRB1
chr1	197871896	197909088	4	C1orf53,LHX9
chr1	197909088	197912616	1	.
chr1	199995816	200016883	3	NR5A2
chr1	200021142	200035898	4	.
chr1	200047026	200053868	1	.
chr1	200208314	200221820	4	.
chr1	200419044	200423871	1	.
chr1	200430419	200443469	1	.
chr1	200458405	200463975	1	.
chr1	200478646	200485387	1	.
chr1	200855057	200864398	2	INAVA
chr1	200890661	200894817	1	.
chr1	200983525	200987417	1	.
chr1	200992842	200997352	1	KIF21B
chr1	201081992	201091928	1	CACNA1S
chr1	201129774	201142410	1	TMEM9
chr1	201150902	201161909	1	IGFN1
chr1	201177567	201181326	1	.
chr1	201192234	201196486	1	.
chr1	201227464	201237643	1	.
chr1	201248385	201260349	1	PKP1
chr1	201265566	201274008	1	.
chr1	201337584	201346323	1	.
chr1	201352294	201359029	1	.
chr1	201364590	201375745	2	LAD1
chr1	201377150	201382141	1	.
chr1	201431714	201454290	2	PHLDA3
chr1	201469752	201480036	1	CSRP1
chr1	201497755	201516006	2	.
chr1	201530661	201537011	1	.
chr1	201553114	201559222	1	.
chr1	201566449	201580128	1	.
chr1	201614830	201622774	1	.
chr1	201899195	201904761	1	.
chr1	202132389	202140766	1	.
chr1	202147059	202160422	1	.
chr1	202161143	202173383	2	LGR6
chr1	202186128	202226435	2	.
chr1	202230487	202294718	2	.
chr1	202587472	202609482	1	.
chr1	202617778	202635526	2	.
chr1	202648409	202668409	2	.
chr1	202683660	202692666	2	.
chr1	202830815	202835781	1	.
chr1	202969010	202975529	1	.
chr1	203074876	203085177	2	.
chr1	203085432	203090177	1	.
chr1	203094346	203101098	1	.
chr1	203218652	203225486	1	.
chr1	203244891	203249615	1	.
chr1	203271659	203280235	1	BTG2
chr1	203307649	203315919	2	.
chr1	203318800	203333452	1	FMOD
chr1	203355360	203358731	1	.
chr1	203363254	203368318	2	.
chr1	203369888	203375729	1	.
chr1	203391301	203401720	1	.
chr1	203405640	203413903	1	.
chr1	203414747	203423607	1	.
chr1	203428438	203438641	1	.
chr1	203440395	203448297	1	PRELP
chr1	204303677	204312472	1	.
chr1	204324926	204331116	1	.
chr1	204463490	204471982	2	PIK3C2B
chr1	204781065	204786721	1	.
chr1	204787723	204804384	1	NFASC
chr1	204845344	204849236	1	.
chr1	204861468	204869652	1	.
chr1	204887357	204892417	1	.
chr1	204927874	204938427	1	.
chr1	204970362	204975614	1	.
chr1	204981040	204985566	1	.
chr1	205007350	205017876	2	CNTN2
chr1	205035899	205041341	1	.
chr1	205286233	205294044	1	NUAK2
chr1	205395871	205399673	1	.
chr1	205401156	205407262	1	.
chr1	205410004	205416685	1	.
chr1	205429980	205443683	2	.
chr1	205542280	205548964	1	.
chr1	205744453	205751046	4	RAB29
chr1	205848572	205856329	1	.
chr1	206164198	206172522	1	.
chr1	206194168	206204210	1	.
chr1	206208249	206213789	1	.
chr1	206217568	206229115	2	AVPR1B
chr1	206248582	206254653	1	.
chr1	206269903	206275011	1	.
chr1	206281102	206287997	1	.
chr1	206291024	206316692	1	.
chr1	206321840	206327830	1	.
chr1	206647412	206652454	1	.
chr1	206667916	206690295	2	RASSF5
chr1	206699871	206712134	1	.
chr1	206718280	206735911	2	.
chr1	206788856	206796262	1	.
chr1	206835628	206847320	1	.
chr1	206850642	206858220	1	MAPKAPK2
chr1	206912492	206966925	2	IL10
chr1	206970731	206980869	1	IL19
chr1	206988998	206995406	1	.
chr1	206996655	207001412	1	.
chr1	207002574	207018309	1	.
chr1	207020297	207026783	2	.
chr1	207030999	207041789	1	IL20
chr1	207056780	207092731	2	IL24
chr1	207110991	207121412	1	PIGR
chr1	207140445	207148161	1	FCAMR
chr1	207177431	207212600	2	C1orf116,PFKFB2
chr1	207254953	207301592	2	C4BPA,C4BPB
chr1	207302871	207308097	2	.
chr1	207340402	207352214	1	.
chr1	207375356	207379905	1	.
chr1	207390374	207398020	1	.
chr1	207409703	207415774	1	.
chr1	207417243	207420613	1	.
chr1	207438544	207444146	1	.
chr1	207458692	207464112	1	.
chr1	207468398	207475349	1	.
chr1	207477062	207495097	1	CD55
chr1	207545663	207571992	1	.
chr1	207575981	207593008	1	.
chr1	207604171	207616214	1	.
chr1	207633497	207645192	2	.
chr1	207651107	207666466	2	.
chr1	207678501	207697214	1	.
chr1	207751196	207762359	1	.
chr1	207764320	207784568	1	.
chr1	207798763	207809772	2	.
chr1	207815535	207836848	2	CR1L
chr1	207848826	207883367	2	.
chr1	208051905	208063973	1	.
chr1	208066140	208072021	1	.
chr1	208080081	208104251	2	CD34
chr1	208106903	208116656	1	.
chr1	208119690	208136106	2	.
chr1	208142690	208152099	1	.
chr1	208252368	208256503	1	.
chr1	208285330	208290460	1	.
chr1	208411425	208423576	1	PLXNA2
chr1	208440310	208448028	4	.
chr1	208448448	208455996	1	.
chr1	209379308	209387157	2	.
chr1	209567384	209572624	1	.
chr1	209608347	209613995	1	.
chr1	209719583	209728701	1	.
chr1	209729847	209749549	1	.
chr1	209751589	209762281	2	CAMK1G
chr1	209865842	209871272	1	.
chr1	209873408	209892870	1	.
chr1	209918304	209927959	1	.
chr1	209931856	209938217	1	.
chr1	209959260	209978370	2	.
chr1	209985707	209997317	2	.
chr1	210033103	210046642	1	.
chr1	210048078	210071606	2	.
chr1	210072638	210078590	1	.
chr1	210103940	210118018	2	SYT14
chr1	210121625	210133540	1	.
chr1	210164920	210200016	2	.
chr1	210200016	210213535	1	.
chr1	210232507	210236435	1	.
chr1	210290247	210295670	1	.
chr1	210333018	210346351	1	.
chr1	210399001	210415319	2	SERTAD4
chr1	210415319	210421101	2	.
chr1	210432850	210438208	1	.
chr1	210461354	210470534	2	.
chr1	210484211	210488958	1	.
chr1	211071591	211083105	1	.
chr1	211086896	211092915	1	.
chr1	211260727	211266860	1	.
chr1	211268473	211272617	1	.
chr1	211274802	211314372	2	AL590132.1,KCNH1
chr1	211384451	211393977	1	.
chr1	212600621	212605362	4	.
chr1	212712344	212773222	4	ATF3
chr1	212781739	212787799	4	.
chr1	212877188	212880942	4	.
chr1	213200661	213213892	4	.
chr1	213551392	213556446	1	.
chr1	213595271	213601456	1	.
chr1	214153999	214167025	2	PROX1
chr1	214189868	214196429	1	.
chr1	214442355	214445503	1	.
chr1	214719618	214724684	1	.
chr1	214726085	214731992	1	PTPN14
chr1	215252162	215262736	2	.
chr1	217249507	217254055	4	.
chr1	217259159	217266636	4	.
chr1	217304779	217313430	4	ESRRG
chr1	217955484	217963406	1	.
chr1	218330287	218346656	4	.
chr1	218346656	218349997	1	.
chr1	220700093	220706283	1	MARK1
chr1	221067725	221071643	4	.
chr1	222517453	222522051	1	.
chr1	222585556	222591803	1	.
chr1	222783769	222791197	4	MIA3
chr1	223305046	223311235	2	.
chr1	223329982	223335709	1	.
chr1	223462668	223468879	1	.
chr1	223524516	223541064	2	SUSD4
chr1	223563041	223569142	2	CCDC185
chr1	223707090	223710784	1	.
chr1	224120448	224130474	1	.
chr1	224281966	224286907	1	.
chr1	224802741	224809422	2	.
chr1	226670338	226676569	1	.
chr1	226688751	226696091	1	.
chr1	226734969	226746437	2	STUM
chr1	226920262	226929731	1	ITPKB
chr1	227669931	227673658	1	.
chr1	227910026	227914392	1	.
chr1	227984768	227993880	1	.
chr1	228013301	228018237	1	.
chr1	228022600	228029265	1	.
chr1	228036689	228044056	1	.
chr1	228066738	228071194	1	.
chr1	228097262	228101859	1	.
chr1	228142360	228153868	1	.
chr1	228167798	228180028	1	.
chr1	228186680	228203544	2	WNT3A
chr1	228209792	228216853	1	.
chr1	228221406	228251174	2	.
chr1	228253043	228260510	2	.
chr1	228318814	228326501	2	.
chr1	228491311	228497215	1	.
chr1	228737359	228741457	1	.
chr1	228866047	228871077	1	RHOU
chr1	229962712	229982811	1	.
chr1	229986779	229993251	1	.
chr1	230010765	230028057	1	.
chr1	230033213	230053189	1	.
chr1	231176526	231185772	2	.
chr1	231294473	231303514	2	TRIM67
chr1	231307296	231313068	1	.
chr1	231558344	231563876	4	EGLN1
chr1	232760977	232769483	2	.
chr1	233429792	233434527	1	PCNX2
chr1	233745780	233749684	4	KCNK1
chr1	234276094	234281979	1	.
chr1	234313102	234320099	1	.
chr1	234336641	234340844	1	.
chr1	234346243	234355367	2	.
chr1	234362592	234366634	1	.
chr1	234390979	234399638	1	.
chr1	234425810	234466126	1	.
chr1	234480891	234507078	2	.
chr1	234614918	234620381	4	TARBP1
chr1	234818348	234824566	4	.
chr1	234921654	234938552	2	.
chr1	234941203	234956404	2	.
chr1	236300159	236305596	2	GPR137B
chr1	236551325	236566529	2	.
chr1	236572880	236578351	1	.
chr1	236622072	236637251	1	.
chr1	236773850	236788540	1	.
chr1	236800103	236805170	1	.
chr1	236836022	236848998	4	.
chr1	237082922	237093267	1	.
chr1	237100411	237104659	1	.
chr1	237127235	237131102	1	.
chr1	237212671	237228609	2	.
chr1	237299049	237303818	1	.
chr1	237306669	237310913	1	.
chr1	237356553	237363122	1	.
chr1	237548450	237554208	1	.
chr1	237609062	237613883	1	.
chr1	239545181	239554509	2	CHRM3
chr1	240155977	240166813	4	.
chr1	240251690	240265586	2	.
chr1	240346727	240349740	2	.
chr1	240933126	240937408	1	.
chr1	241123526	241134154	1	.
chr1	241202883	241207705	1	.
chr1	241238754	241245019	1	.
chr1	241266750	241269884	1	.
chr1	241291625	241296267	1	.
chr1	241371899	241377419	1	.
chr1	241493680	241500320	1	.
chr1	241502770	241508137	1	.
chr1	241513010	241527360	2	RGS7
chr1	241560970	241566633	1	.
chr1	241568267	241605876	2	.
chr1	241606301	241611964	1	.
chr1	241631032	241639629	1	.
chr1	241701022	241715417	2	.
chr1	241719790	241725833	1	.
chr1	241728419	241735012	1	.
chr1	241811038	241821612	1	WDR64
chr1	241825873	241838429	1	.
chr1	241839794	241862506	2	OPN3
chr1	241871310	241932424	2	.
chr1	241937638	241950683	1	.
chr1	241955762	241962447	1	.
chr1	241962519	241998600	2	.
chr1	244077972	244086255	2	.
chr1	244128919	244134755	1	.
chr1	244172485	244178195	2	.
chr1	244200201	244210636	4	.
chr1	244271567	244279608	4	.
chr1	244281819	244288178	4	.
chr1	244424300	244428337	1	.
chr1	247398523	247402968	1	.
chr1	247575603	247581646	1	NLRP3
chr1	247587921	247592378	1	.
chr1	247594588	247602182	1	.
chr1	247991956	248010440	1	OR11L1
chr1	248012735	248018694	1	.
chr1	248022439	248031721	1	.
chr1	248061502	248071633	1	.
chr1	248075468	248090873	1	OR2AJ1,OR2T8
chr1	248100135	248104332	1	.
chr1	248300431	248306923	1	.
chr1	248340040	248344426	1	.
chr1	248409282	248414254	1	.
chr1	248439737	248444984	1	OR2T33
chr1	248491920	248496075	1	.
chr1	248518865	248523896	1	.
chr1	248527709	248534914	1	.
chr1	248590871	248601053	1	.
chr1	248606363	248617774	1	OR2T2
chr1	248632121	248652436	1	OR2T3,OR2T5
chr1	248663995	248670025	1	.
chr1	248704087	248709697	1	.
chr1	248722470	248732916	1	OR2T29
chr1	248770036	248775051	1	.
chr1	248802442	248809002	1	OR2T35
chr1	248815088	248829016	1	OR2T27
chr1	248856659	248874029	1	.
chr1	248891943	248908210	2	.
chr1	249062095	249072090	2	.
chr1	249074835	249100924	1	.
chr1	249124514	249130043	1	.
chr10	113640	118655	1	.
chr10	997394	1000886	4	.
chr10	1954243	1971350	4	.
chr10	2812636	2817320	2	.
chr10	4718494	4745470	2	.
chr10	4754458	4808631	1	.
chr10	4810038	4836268	1	AKR1E2
chr10	4840444	4849092	1	.
chr10	4861136	4877517	1	.
chr10	4891957	4899865	1	.
chr10	4905741	4915206	1	.
chr10	4928683	4933304	1	.
chr10	4956696	4961475	1	.
chr10	4979892	4985029	1	.
chr10	4992519	5007892	1	AKR1C1
chr10	5025259	5032113	1	.
chr10	5037749	5048454	1	.
chr10	5052252	5058228	1	.
chr10	5080503	5085462	1	.
chr10	5132967	5142819	1	.
chr10	5317205	5329910	1	.
chr10	5355212	5367837	1	.
chr10	5369885	5374664	1	.
chr10	5387723	5411211	2	UCN3
chr10	5541255	5549895	1	CALML5
chr10	6035408	6048128	1	.
chr10	6076048	6089991	2	.
chr10	6089991	6096445	1	.
chr10	6097932	6105266	1	IL2RA
chr10	6107203	6129312	1	.
chr10	6174041	6185514	2	.
chr10	6350848	6358816	1	.
chr10	6440176	6464165	1	.
chr10	6469156	6479753	1	.
chr10	6511990	6519579	2	.
chr10	6529801	6551553	2	.
chr10	6551553	6563838	2	.
chr10	6563838	6567838	1	.
chr10	6572502	6584991	1	.
chr10	6606255	6621793	2	PRKCQ
chr10	6621793	6642477	1	PRKCQ
chr10	6643418	6647784	1	.
chr10	6659729	6670051	1	.
chr10	6695999	6699006	1	.
chr10	6705040	6717921	1	.
chr10	6748470	6762259	1	.
chr10	6769980	6785616	1	.
chr10	6793244	6800526	1	.
chr10	6801894	6814635	1	.
chr10	6821319	6838434	1	.
chr10	6868927	6873870	1	.
chr10	6891416	6895933	1	.
chr10	6918011	6921721	1	.
chr10	6929070	6932986	1	.
chr10	7458839	7463373	1	.
chr10	7464375	7469829	4	.
chr10	7510742	7515840	4	.
chr10	7525314	7532415	1	.
chr10	7570357	7575117	1	.
chr10	7701477	7713861	2	ITIH5
chr10	7713927	7718474	2	.
chr10	7744729	7749559	1	ITIH2
chr10	7759370	7771128	1	.
chr10	8077010	8093654	3	.
chr10	8093654	8120606	4	GATA3
chr10	8120606	8125528	1	.
chr10	8143500	8148645	1	.
chr10	8339329	8344386	1	.
chr10	8362151	8379361	1	.
chr10	8549956	8554646	1	.
chr10	9363169	9368889	1	.
chr10	9705959	9709644	1	.
chr10	9773215	9778903	1	.
chr10	10502539	10508469	1	.
chr10	10833067	10843772	1	CELF2
chr10	10886343	10890987	1	.
chr10	10911426	10917466	1	.
chr10	11909547	11915929	1	.
chr10	13415705	13437001	2	.
chr10	13471569	13488317	2	.
chr10	13504234	13514326	1	.
chr10	13517855	13528068	1	.
chr10	13530113	13542835	2	.
chr10	13545163	13550348	1	.
chr10	13557589	13572656	2	BEND7
chr10	13572656	13587741	2	.
chr10	13587741	13591006	1	.
chr10	13610142	13620175	1	.
chr10	13623001	13629609	1	PRPF18
chr10	13928925	13933829	1	.
chr10	14203143	14213562	1	.
chr10	14218751	14225906	1	.
chr10	14370790	14381386	1	.
chr10	15036809	15040935	1	.
chr10	15471529	15476526	1	.
chr10	15478056	15487431	1	.
chr10	15571876	15577973	1	.
chr10	15628591	15632304	1	.
chr10	15642302	15653115	1	.
chr10	15723335	15736410	1	.
chr10	15736410	15740033	1	.
chr10	15761711	15769948	1	ITGA8
chr10	15998896	16006088	1	.
chr10	16009672	16015825	1	.
chr10	16080349	16085739	1	.
chr10	16096859	16101878	1	.
chr10	16220790	16227202	1	.
chr10	16270317	16276783	1	.
chr10	16332260	16337032	1	.
chr10	16395396	16399355	1	.
chr10	16403883	16411957	1	.
chr10	16413308	16420130	1	.
chr10	16423994	16430438	1	.
chr10	16460928	16476624	1	.
chr10	16571071	16591919	1	.
chr10	16605121	16614879	1	.
chr10	16616566	16621808	1	.
chr10	17308341	17317250	1	.
chr10	17325880	17338034	2	.
chr10	17358978	17363310	1	.
chr10	17395102	17400505	1	.
chr10	17471312	17483849	1	.
chr10	17496295	17505905	1	ST8SIA6
chr10	17534665	17539467	1	.
chr10	21459752	21463387	1	NEBL
chr10	22625309	22640789	4	SPAG6
[truncated: 16,483 more rows]

## Sheet: VUMC H3K27me3
Chromosome	Start position	End position
chr1	31570	38131
chr1	42818	47159
chr1	49543	56439
chr1	57905	69436
chr1	92060	98535
chr1	112664	116090
chr1	118808	123358
chr1	232303	236767
chr1	260951	264719
chr1	340296	351631
chr1	357279	362474
chr1	365152	368789
chr1	621931	630358
chr1	802308	810103
chr1	812604	837005
chr1	849164	854728
chr1	857161	859365
chr1	860812	877617
chr1	902925	907052
chr1	913843	933978
chr1	936144	939436
chr1	1009393	1013115
chr1	1513369	1524537
chr1	1926665	1939018
chr1	1943015	1957944
chr1	2556306	2561981
chr1	2582433	2632751
chr1	2694389	2698438
chr1	2715656	2725253
chr1	2730086	2735257
chr1	2739316	2748174
chr1	2749285	2749302
chr1	2753205	2757346
chr1	2758660	2774555
chr1	2776149	2783005
chr1	2790093	2795566
chr1	2821520	2825254
chr1	2864209	2867849
chr1	3566677	3571393
chr1	3998988	4006463
chr1	4011787	4019319
chr1	4054402	4057478
chr1	4074261	4080771
chr1	4190608	4195417
chr1	4217827	4222892
chr1	4230118	4236189
chr1	4711818	4714589
chr1	4715918	4721475
chr1	5729422	5733624
chr1	5776720	5782311
chr1	5871379	5875934
chr1	5894167	5900198
chr1	5909661	5913254
chr1	6237402	6242189
chr1	6475216	6485351
chr1	6507356	6515979
chr1	6764586	6770833
chr1	6788292	6793568
chr1	7999429	8004103
chr1	9098803	9103892
chr1	9149309	9153671
chr1	9191741	9198377
chr1	9240930	9247834
chr1	9254943	9273532
chr1	9353717	9358411
chr1	9480683	9484648
chr1	9525188	9536134
chr1	9707652	9718536
chr1	9721966	9731144
chr1	10850020	10855902
chr1	10867079	10871733
chr1	10944037	10948894
chr1	11398282	11402214
chr1	11446784	11453125
chr1	11470818	11476435
chr1	11495401	11500966
chr1	11510619	11525233
chr1	11538333	11547203
chr1	11557289	11561090
chr1	11597419	11602640
chr1	11604927	11608312
chr1	11614192	11631385
chr1	11640069	11649932
chr1	11672922	11682483
chr1	11685974	11689920
chr1	11695662	11703298
chr1	11915753	11929028
chr1	11929861	11934149
chr1	11955045	11960545
chr1	12120795	12129200
chr1	12134496	12138755
chr1	12651568	12656776
chr1	12674131	12683979
chr1	12703575	12708164
chr1	12814367	12817589
chr1	12840838	12843258
chr1	13151474	13159033
chr1	13203148	13209087
chr1	13213290	13219880
chr1	13681949	13685553
chr1	13838316	13844149
chr1	14214308	14221697
chr1	14922630	14930202
chr1	16832614	16868281
chr1	16872433	16876085
chr1	16975987	16982514
chr1	16985091	16999541
chr1	17000399	17039820
chr1	17046523	17057025
chr1	17058468	17075595
chr1	17077380	17084901
chr1	17088990	17125638
chr1	17186425	17223905
chr1	17227230	17232357
chr1	17382864	17387676
chr1	17442989	17446308
chr1	17502037	17509028
chr1	18346307	18350831
chr1	18357153	18360660
chr1	18431345	18439601
chr1	18884041	18889508
chr1	18928905	18986218
chr1	18993682	18999698
chr1	19015953	19034055
chr1	19038901	19054407
chr1	19057106	19061655
chr1	19094549	19097467
chr1	19106067	19119567
chr1	19127795	19132987
chr1	19138719	19142273
chr1	19142990	19147531
chr1	19307831	19315594
chr1	19361622	19366665
chr1	19986187	20001029
chr1	20011392	20016805
chr1	20028449	20038542
chr1	20057622	20083956
chr1	20085582	20089243
chr1	20122031	20134934
chr1	20138982	20145298
chr1	20147956	20151654
chr1	20170852	20177513
chr1	20282998	20285668
chr1	20306689	20310253
chr1	20315485	20321067
chr1	20323349	20328489
chr1	20510666	20514297
chr1	20538951	20543418
chr1	20559682	20562838
chr1	20644401	20655190
chr1	20686144	20702171
chr1	20710129	20716926
chr1	20772221	20779855
chr1	20791512	20794247
chr1	20800010	20819851
chr1	20854945	20858037
chr1	20859206	20862883
chr1	20869536	20886117
chr1	20888502	20892513
chr1	20897886	20901861
chr1	20913067	20921365
chr1	22466456	22469163
chr1	22508202	22512890
chr1	22530175	22542411
chr1	22560013	22563774
chr1	22676832	22677498
chr1	22708008	22711696
chr1	22713751	22718467
chr1	22722731	22726108
chr1	22758374	22762966
chr1	22886230	22889761
chr1	22922651	22964810
chr1	23277281	23282726
chr1	23974202	23978296
chr1	23995947	23999097
chr1	24004183	24008359
chr1	24162563	24165370
chr1	24226266	24233940
chr1	24438403	24441455
chr1	24468801	24473011
chr1	24498013	24502276
chr1	24511656	24516808
chr1	24823281	24834185
chr1	25184828	25189767
chr1	25199183	25210785
chr1	25244627	25262210
chr1	25266014	25272158
chr1	25295692	25298611
chr1	25331220	25335317
chr1	25461067	25467917
chr1	25475601	25481546
chr1	25482413	25486579
chr1	26247199	26255560
chr1	26363421	26403616
chr1	26404512	26413598
chr1	26416572	26424908
chr1	26425975	26431223
chr1	26639153	26642296
chr1	26651761	26658794
chr1	26660489	26671501
chr1	26682947	26692995
chr1	26706101	26713889
chr1	26716815	26720751
chr1	26724588	26750266
chr1	27281487	27291725
chr1	27309152	27314342
chr1	27316717	27320409
chr1	27637557	27643057
chr1	28016538	28020479
chr1	29136075	29138953
chr1	29448374	29452289
chr1	29557892	29572903
chr1	29582723	29595733
chr1	29623884	29627528
chr1	29668758	29673885
chr1	29674917	29678208
chr1	29696342	29699660
chr1	29763513	29770228
chr1	29796517	29807440
chr1	29838262	29848662
chr1	29851374	29855013
chr1	30046079	30054064
chr1	30102550	30107320
chr1	30114683	30119424
chr1	30253892	30257875
chr1	30303089	30314630
chr1	30324853	30328500
chr1	30372005	30375500
chr1	30555151	30558929
chr1	30580468	30587310
chr1	30718608	30733855
chr1	30850847	30854779
chr1	31064744	31070801
chr1	31112884	31124492
chr1	31153855	31162073
chr1	31281658	31287013
chr1	31881226	31885975
chr1	31895502	31899029
chr1	31927854	31946299
chr1	32016767	32023428
chr1	32032145	32035453
chr1	32052509	32060030
chr1	32061349	32067901
chr1	32071702	32077304
chr1	32081155	32084236
chr1	32267104	32271973
chr1	33348827	33374147
chr1	33663513	33668028
chr1	33886698	33896402
chr1	33900421	33911592
chr1	33991466	33999768
chr1	34017720	34021555
chr1	34039045	34045693
chr1	34047017	34054296
chr1	34117726	34123553
chr1	34195388	34201649
chr1	34624158	34636364
chr1	34638387	34647127
chr1	34904846	34908186
chr1	35112567	35121462
chr1	35168485	35172483
chr1	35201433	35208681
chr1	35243727	35252453
chr1	35254622	35260007
chr1	35334475	35357885
chr1	35365568	35371610
chr1	35385212	35404803
chr1	35407939	35410949
chr1	35418488	35421127
chr1	35424816	35428670
chr1	35506820	35512484
chr1	36109170	36119437
chr1	36121026	36125635
chr1	36126486	36173745
chr1	36961065	36971375
chr1	37011783	37022947
chr1	37046579	37064327
chr1	37162331	37165583
chr1	37496349	37505231
chr1	37908012	37911169
chr1	38064814	38117686
chr1	38118990	38144359
chr1	38188840	38211721
chr1	38212757	38259695
chr1	38507405	38511052
chr1	38512493	38519132
chr1	38599761	38602823
chr1	39267255	39275185
chr1	39277219	39288780
chr1	39292700	39299430
chr1	40134538	40138018
chr1	40151990	40165759
chr1	40179142	40184899
chr1	40186637	40199432
chr1	40360749	40365019
chr1	40570585	40575378
chr1	40580621	40586645
chr1	40609176	40614711
chr1	40615806	40623210
chr1	40780858	40785514
chr1	41849098	41853363
chr1	43640525	43644002
chr1	43661293	43666674
chr1	44585350	44589942
chr1	44861753	44889830
chr1	44892278	44896341
chr1	45667775	45671466
chr1	46909453	46970062
chr1	46978955	46984545
chr1	46986310	47001409
chr1	47205600	47212633
chr1	47221378	47225976
chr1	47252710	47256029
chr1	47486843	47493609
chr1	47594296	47596922
chr1	47644069	47647261
chr1	47665685	47669098
chr1	47671758	47678655
chr1	47686808	47711836
chr1	47869104	47919606
chr1	47971058	47977068
chr1	47995880	48001520
chr1	48041614	48049418
chr1	48056902	48060664
chr1	48168949	48194554
chr1	48196586	48201636
chr1	48479036	48483870
chr1	50574775	50578207
chr1	50830593	50834289
chr1	50884729	50886962
chr1	50888271	50898146
chr1	51443887	51453858
chr1	51458974	51462895
chr1	51465031	51472596
chr1	51480785	51486777
chr1	51508462	51511433
chr1	51535172	51546566
chr1	51548245	51551726
chr1	51553619	51559444
chr1	51573917	51578809
chr1	51581529	51586736
chr1	51594695	51597800
chr1	51606041	51613831
chr1	52347364	52353395
chr1	52355406	52358772
chr1	53884188	53887285
chr1	54196732	54209278
chr1	55171200	55178207
chr1	55245856	55251658
chr1	55264245	55269405
chr1	55500378	55507498
chr1	58712032	58720138
chr1	60312284	60317719
chr1	60392879	60398782
chr1	61092390	61092571
chr1	63388892	63393032
chr1	63393832	63401601
chr1	63413418	63422098
chr1	63442525	63445738
chr1	63460497	63469546
chr1	63473185	63478381
chr1	63536311	63543054
chr1	63627129	63634463
chr1	63649840	63655185
chr1	63661592	63671262
chr1	63739148	63744894
chr1	63758649	63773215
chr1	63777286	63801029
chr1	63807663	63812719
chr1	63816825	63821591
chr1	65720144	65736708
chr1	65772109	65777047
chr1	65988079	65994314
chr1	66254877	66261565
chr1	67240634	67244977
chr1	67556546	67562725
chr1	67765160	67786868
chr1	68626358	68628981
chr1	69022787	69028504
chr1	69029554	69039174
chr1	69130409	69134419
chr1	69136290	69140112
chr1	69141152	69146077
chr1	69167695	69171978
chr1	69272628	69287864
chr1	69312288	69316183
chr1	69545434	69549735
chr1	69985718	69990267
chr1	70028900	70041628
chr1	70078615	70082579
chr1	70085192	70090309
chr1	70202734	70206068
chr1	70247402	70252249
chr1	70338158	70341185
chr1	70341928	70347032
chr1	70414036	70417504
chr1	70443327	70448828
chr1	70451401	70455253
chr1	70524547	70530009
chr1	70539121	70547044
chr1	70565024	70570586
chr1	70581932	70588617
chr1	76453111	76457427
chr1	78954906	78960066
chr1	85275164	85277984
chr1	85354704	85362531
chr1	85376138	85380426
chr1	85403273	85409879
chr1	85415378	85419070
chr1	85459750	85470044
chr1	85501973	85530466
chr1	85545710	85564296
chr1	85567229	85570660
chr1	85620229	85645868
chr1	85646959	85651763
chr1	85654378	85701966
chr1	85925471	85932058
chr1	85980164	86005700
chr1	86042318	86051761
chr1	86193222	86197865
chr1	86200166	86203319
chr1	86312644	86316687
chr1	86618112	86626545
chr1	87053872	87058570
chr1	87156776	87163335
chr1	88924520	88931349
chr1	91153495	91163614
chr1	91165933	91221622
chr1	91223795	91231289
chr1	91261175	91266124
chr1	91292431	91316814
chr1	92946556	92957102
chr1	95543047	95549753
chr1	95871435	95876509
chr1	99278618	99281855
chr1	99295928	99299647
chr1	99306561	99311450
chr1	99317824	99322078
chr1	99450245	99454315
chr1	99461316	99476811
chr1	99533167	99539067
chr1	99631661	99635193
chr1	99726683	99733405
chr1	100999946	101008658
chr1	101693894	101703699
chr1	101705436	101717616
chr1	101739690	101743861
chr1	102428715	102433012
chr1	102439179	102443106
chr1	102460642	102462982
chr1	103571784	103576298
chr1	103709980	103713880
chr1	103768240	103773413
chr1	104164883	104174402
chr1	104181642	104198636
chr1	104204694	104208567
chr1	104232294	104246914
chr1	104250687	104255716
chr1	104265319	104271315
chr1	104274904	104281635
chr1	104285092	104292425
chr1	104299567	104304394
chr1	104305608	104310135
chr1	104448830	104452573
chr1	104636991	104643192
chr1	105006899	105011939
chr1	105434501	105438889
chr1	105668454	105672184
chr1	105680610	105685264
chr1	105686409	105690400
chr1	106009225	106009767
chr1	106427042	106430802
chr1	106456506	106459539
chr1	106463432	106474166
chr1	106476928	106481040
chr1	106541357	106549778
chr1	107869553	107871850
chr1	108503425	108507350
chr1	108750209	108760827
chr1	108776882	108782593
chr1	108784304	108793466
chr1	108803068	108806822
chr1	108816262	108820566
chr1	108909028	108918929
chr1	108919679	108927586
chr1	108964365	108970369
chr1	108987779	109001454
chr1	109013937	109018591
chr1	109203225	109206890
chr1	109655935	109661371
chr1	109981645	109995514
chr1	109996330	110020903
chr1	110022013	110025637
chr1	110613450	110616098
chr1	110622828	110636787
chr1	110650210	110662284
chr1	110675475	110696182
chr1	110701876	110712777
chr1	110989784	110997704
chr1	111095344	111101497
chr1	111146541	111154370
chr1	111161906	111166063
chr1	111180923	111185797
chr1	111205215	111222079
chr1	111232508	111240916
chr1	111254314	111258042
chr1	111267668	111271732
chr1	111389359	111399903
chr1	111417681	111422831
chr1	111629108	111633434
chr1	111743813	111755321
chr1	111812500	111815659
chr1	111944668	111953282
chr1	112864089	112866828
chr1	112877648	112881862
chr1	112915354	112919767
chr1	113046080	113053425
chr1	114371980	114376532
chr1	114540375	114544250
chr1	114568754	114576401
chr1	114583651	114589326
chr1	114631317	114634364
chr1	114688613	114704142
chr1	114754206	114758597
chr1	114802317	114806300
chr1	114811173	114817185
chr1	114825905	114834606
chr1	114836426	114845392
chr1	114872559	114877498
chr1	115126499	115158614
chr1	115160423	115243659
chr1	115324231	115327004
chr1	115328306	115332650
chr1	115334196	115346516
chr1	115352625	115361763
chr1	115369237	115403558
chr1	115412936	115426453
chr1	115439468	115446108
chr1	115484958	115490403
chr1	115591279	115597398
chr1	115614660	115618050
chr1	115627680	115636531
chr1	115876930	115884847
chr1	116020799	116025433
chr1	116366048	116392675
chr1	116514504	116523262
chr1	116666022	116670252
chr1	117448594	117461731
chr1	118144099	118153181
chr1	118158426	118163394
chr1	120187853	120205334
chr1	120901354	120907997
chr1	120920293	120927191
chr1	120930553	120936656
chr1	121133211	121141534
chr1	142586839	142591113
chr1	142593570	142599790
chr1	142635526	142640218
chr1	142781046	142785064
chr1	142854362	142855660
chr1	142857067	142861271
chr1	142909958	142928746
chr1	143267372	143274910
chr1	143434318	143441187
chr1	143484409	143494306
chr1	143683924	143689532
chr1	143726460	143769592
chr1	143871013	143876710
chr1	143878797	143883477
chr1	144298773	144303360
chr1	144309953	144315308
chr1	144322985	144342635
chr1	144344250	144346451
chr1	144353331	144361733
chr1	144366070	144375761
chr1	144383170	144392591
chr1	144479073	144482536
chr1	144489451	144496761
chr1	144502673	144545780
chr1	144547447	144558247
chr1	144567360	144573183
chr1	144583281	144588198
chr1	144674946	144678527
chr1	144680298	144680450
chr1	144707385	144709093
chr1	144835589	144838885
chr1	144851795	144863545
chr1	144982469	144985328
chr1	145000044	145004915
chr1	145070444	145080693
chr1	145088115	145092899
chr1	145097100	145125907
chr1	145289063	145293191
chr1	145379998	145382707
chr1	145413270	145419429
chr1	145611315	145625235
chr1	145942338	145947683
chr1	145958164	146024411
chr1	146086059	146089954
chr1	146143745	146149849
chr1	146331763	146337282
chr1	146362612	146366951
chr1	146470914	146480692
chr1	146490292	146532718
chr1	146541544	146568779
chr1	146592725	146596552
chr1	146600512	146611308
chr1	146695280	146699616
chr1	146801061	146805349
chr1	146806857	146813220
chr1	146821620	146824883
chr1	146826223	146829827
chr1	147195332	147204107
chr1	147240781	147245532
chr1	147384287	147389255
chr1	147484807	147493342
chr1	147499959	147515490
chr1	147516825	147537278
chr1	147539432	147568740
chr1	147686680	147691699
chr1	147705871	147718132
chr1	147720850	147743558
chr1	147768210	147772017
chr1	147775562	147788512
chr1	147800299	147813342
chr1	147822964	147827172
chr1	147871252	147877011
chr1	147913616	147941549
chr1	147944973	147953280
chr1	147955485	147967673
chr1	147975164	147982580
chr1	147985900	147995998
chr1	147998194	148002148
chr1	148176143	148232567
chr1	148235807	148249406
chr1	148514521	148553704
chr1	148555308	148559236
chr1	148597078	148614830
chr1	148617469	148625525
chr1	148629941	148641927
chr1	148644409	148656458
chr1	148659827	148671988
chr1	148672965	148684138
chr1	148758940	148787935
chr1	148789443	148817850
chr1	148819021	148832709
chr1	148835579	148848270
chr1	148851075	148929834
chr1	148931921	148935945
chr1	148939362	148946437
chr1	148950052	148954394
chr1	149004507	149009896
chr1	149011900	149023214
chr1	149134073	149141446
chr1	149143375	149177365
chr1	149181538	149196779
chr1	149202921	149206548
chr1	149211321	149237611
chr1	149272103	149293629
chr1	149297038	149314366
chr1	149318459	149322484
chr1	149330479	149337367
chr1	149357122	149385679
chr1	149394520	149403598
chr1	149432716	149437367
chr1	149511994	149515513
chr1	149526361	149534016
chr1	149543061	149551157
chr1	149556257	149561015
chr1	149570177	149594508
chr1	149601946	149608073
chr1	149613834	149618097
chr1	149671602	149676136
chr1	149683432	149694932
chr1	149743095	149762773
chr1	149764674	149768081
chr1	149783709	149786927
chr1	151680667	151703928
chr1	151712044	151721008
chr1	151974024	151984861
chr1	151987754	151990337
chr1	151991316	152000671
chr1	152006849	152018512
chr1	152021779	152033677
chr1	152036118	152101682
chr1	152129243	152132212
chr1	152133973	152139855
chr1	152151260	152154657
chr1	152160710	152164603
chr1	152348306	152353052
chr1	152482015	152494147
chr1	152505602	152508136
chr1	152629148	152635288
chr1	152641249	152645001
chr1	152647738	152652410
chr1	152655168	152660942
chr1	152696731	152700178
chr1	152727224	152731293
chr1	152755097	152760857
chr1	152795998	152803103
chr1	152867211	152872902
chr1	152884071	152891153
chr1	152961764	152965542
chr1	153016291	153020700
chr1	153022600	153028646
chr1	153058131	153063263
chr1	153100287	153105208
chr1	153107572	153127723
chr1	153141494	153150218
chr1	153170090	153175194
chr1	153230064	153250580
chr1	153252076	153257172
chr1	153263236	153285036
chr1	153308741	153341414
chr1	153346002	153376182
chr1	153377598	153383457
chr1	153396533	153414714
chr1	153418157	153423031
chr1	153428829	153458006
chr1	153467157	153474732
chr1	153650608	153654339
chr1	154020112	154023850
chr1	154027476	154035070
chr1	154162600	154166325
chr1	154288850	154296609
chr1	154461434	154497406
chr1	154506298	154518622
chr1	154537328	154543888
chr1	154625662	154635516
chr1	155051317	155056321
chr1	155089881	155093236
chr1	155113509	155120639
chr1	156317459	156325877
chr1	156336386	156345784
chr1	156354584	156362704
chr1	156367750	156422654
chr1	156577600	156584415
chr1	156585503	156596580
chr1	156650885	156655340
chr1	156790645	156795515
chr1	156800009	156810428
chr1	156825230	156837441
chr1	156838409	156902201
chr1	157072142	157082469
chr1	157108071	157122578
chr1	157125833	157140381
chr1	157141269	157181492
chr1	157186055	157192369
chr1	157197691	157210735
chr1	157233783	157252000
chr1	157264564	157267665
chr1	157271694	157278822
chr1	157292782	157300603
chr1	157305339	157310145
chr1	157321294	157329682
chr1	157341750	157356658
chr1	157358333	157365174
chr1	157397682	157406483
chr1	157439341	157443833
chr1	157468618	157473210
chr1	157512329	157516666
chr1	157521365	157524703
chr1	157588603	157592989
chr1	157597727	157600720
chr1	157667812	157672020
chr1	157929388	157933573
chr1	157961183	157965139
chr1	158081507	158085738
chr1	158137966	158157004
chr1	158159174	158176099
chr1	158680413	158683661
chr1	158707914	158713891
chr1	158968425	158972570
chr1	159043556	159051923
chr1	159064558	159068926
chr1	159092321	159100061
chr1	159101402	159113519
chr1	159135784	159145247
chr1	159154430	159161518
chr1	159162674	159166534
chr1	159172857	159181104
chr1	159249114	159253471
chr1	159326980	159336668
chr1	159394504	159401867
chr1	159404080	159409129
chr1	159436885	159444188
chr1	159585964	159589992
chr1	159614910	159633876
chr1	159635787	159649692
chr1	159658679	159666928
chr1	159734481	159739703
chr1	159920151	159974774
chr1	159976935	159989719
chr1	160020769	160031920
chr1	160033747	160053181
chr1	160347098	160354402
chr1	160358550	160362169
chr1	160407869	160412561
chr1	160413320	160442378
chr1	160450053	160458902
chr1	160461119	160467201
chr1	160496134	160501033
chr1	160522419	160528006
chr1	160533290	160538725
chr1	160576368	160588006
chr1	160610465	160617919
chr1	160621477	160625051
chr1	160640019	160644965
chr1	160646815	160657191
chr1	160659236	160665414
chr1	160668076	160698137
chr1	160707132	160710031
chr1	160721016	160723530
chr1	160738224	160744781
chr1	160780618	160783512
chr1	160814227	160821123
chr1	160833102	160837354
chr1	160838739	160843877
chr1	160873494	160878550
chr1	160913560	160920279
chr1	160924882	160926289
chr1	160939636	160954750
chr1	160964287	160969291
chr1	160985217	160997432
chr1	161028177	161039744
chr1	161049874	161053772
chr1	161225563	161234056
chr1	161236104	161239957
chr1	161241668	161250891
chr1	161252078	161260418
chr1	161275314	161281609
chr1	161450894	161455197
chr1	161458511	161463890
chr1	161466185	161472684
chr1	161496115	161507059
chr1	161508603	161512219
chr1	161530641	161533867
chr1	161535776	161541038
chr1	161552996	161557233
chr1	161589946	161594142
chr1	161613782	161617089
chr1	161619258	161627636
chr1	161649864	161655540
chr1	161686344	161711961
chr1	162454435	162462974
chr1	165082906	165089384
chr1	165201151	165208253
chr1	165311593	165331177
chr1	165340514	165347048
chr1	165410458	165417113
chr1	165432919	165436640
chr1	165527864	165533136
chr1	165537687	165548456
chr1	165556176	165560407
chr1	165561986	165566854
chr1	166130684	166141037
chr1	166152533	166155808
chr1	166294699	166299050
chr1	166301270	166303972
chr1	166448636	166455193
chr1	166530725	166536803
chr1	166546721	166555506
chr1	166600262	166605156
chr1	166734656	166738430
chr1	166748857	166755305
chr1	166759060	166768956
chr1	166770620	166778465
chr1	167597166	167601238
chr1	169551916	169555843
chr1	173655411	173660349
chr1	175276631	175282296
chr1	176518630	176524910
chr1	176871107	176875436
chr1	177130889	177142999
chr1	178694531	178700281
chr1	178752289	178757078
chr1	178759947	178769931
chr1	178778260	178782384
chr1	178792520	178796025
chr1	178819191	178830956
chr1	178831927	178865068
chr1	178905226	178910839
chr1	179405359	179414955
chr1	179415867	179419649
chr1	179475598	179479987
chr1	179542126	179557355
chr1	179558521	179568171
chr1	179694508	179701892
chr1	179704502	179718396
chr1	179728986	179734249
chr1	180190866	180213820
chr1	181283535	181290120
chr1	181448060	181459148
chr1	181606059	181609954
chr1	181873306	181876888
chr1	182424409	182429838
chr1	182532161	182536203
chr1	182555510	182559213
chr1	182628767	182636647
chr1	182638039	182642244
chr1	182645317	182648646
chr1	182743766	182749316
chr1	182755437	182765874
chr1	182782180	182787469
chr1	182793631	182799584
chr1	183383053	183388163
chr1	185565782	185569998
chr1	186192518	186197423
chr1	199995842	200016442
chr1	200037650	200053155
chr1	200210816	200220437
chr1	200269387	200274487
chr1	200480613	200484694
chr1	200856554	200862924
chr1	201084144	201089330
chr1	201178209	201181039
chr1	201208948	201216657
chr1	201250341	201254894
chr1	201339991	201343954
chr1	201364680	201373900
chr1	201434836	201452666
chr1	201471413	201479276
chr1	201501981	201513588
chr1	201617814	201622136
chr1	202147611	202151050
chr1	202154428	202160026
chr1	202161143	202172834
chr1	202177660	202191974
chr1	202193051	202200913
chr1	202201873	202214355
chr1	202215378	202229874
chr1	202231307	202240797
chr1	202246744	202286508
chr1	202287974	202291944
chr1	202598774	202635100
chr1	202651112	202660609
chr1	202663097	202692612
chr1	202941713	202950352
chr1	202953943	202968989
chr1	202970769	202974746
chr1	203073231	203087535
chr1	203094650	203098393
chr1	203308410	203314970
chr1	203364078	203367471
chr1	203415179	203420349
chr1	203431092	203434151
chr1	204340102	204347908
chr1	204464278	204469612
chr1	204798297	204804001
chr1	204981547	204985425
chr1	205009004	205017062
chr1	205393240	205396364
chr1	205421172	205437954
chr1	205440449	205443525
chr1	205524649	205528419
chr1	205531933	205544475
chr1	205545301	205548855
chr1	206167676	206171951
chr1	206219761	206228838
chr1	206292174	206297236
chr1	206299791	206307717
chr1	206674102	206690123
chr1	206725313	206735037
chr1	206837988	206842004
chr1	206917127	206952674
chr1	207006948	207013198
chr1	207021229	207025843
chr1	207031378	207034966
chr1	207056954	207070967
chr1	207080521	207089513
chr1	207114585	207119996
chr1	207154297	207164713
chr1	207165777	207175642
chr1	207181517	207196051
chr1	207198143	207211703
chr1	207256658	207269927
chr1	207273505	207282339
chr1	207295540	207300860
chr1	207303643	207307644
chr1	207343654	207347375
chr1	207469587	207474935
chr1	207477102	207486186
chr1	207548727	207565039
chr1	207615077	207644503
chr1	207657210	207660020
chr1	207663900	207682829
chr1	207690942	207694882
chr1	207756041	207758854
chr1	207799890	207833982
chr1	207839304	207850335
chr1	207854041	207861603
chr1	207862339	207871249
chr1	208066796	208071855
chr1	208080828	208095042
chr1	208111813	208116654
chr1	208120426	208135859
chr1	208412258	208417869
chr1	209379479	209386229
chr1	209744929	209749426
chr1	209755246	209762217
chr1	209880428	209886808
chr1	209922435	209927916
chr1	209959365	209972681
chr1	209986343	209994971
chr1	210034450	210037954
chr1	210048644	210061926
chr1	210066572	210071062
chr1	210106295	210116936
chr1	210129333	210133436
chr1	210168733	210179987
chr1	210186446	210192078
chr1	210226150	210229993
chr1	210402022	210418589
chr1	210463263	210468865
chr1	211074871	211077728
chr1	211281689	211287767
chr1	211290377	211294553
chr1	211296178	211314202
chr1	211387706	211393720
chr1	212776401	212780751
chr1	213201522	213206682
chr1	214154264	214161143
chr1	214357050	214364349
chr1	215252611	215261350
chr1	216893612	216897806
chr1	222586666	222591047
chr1	223305232	223310205
chr1	223529953	223540192
chr1	223563041	223567577
chr1	224803018	224807338
chr1	226735275	226741725
chr1	226921951	226926951
chr1	227985107	227992506
chr1	228142502	228153536
chr1	228186822	228203371
chr1	228222896	228232609
chr1	228238700	228249923
chr1	228253652	228260398
chr1	228321815	228325203
chr1	228492907	228496494
chr1	228703517	228707732
chr1	229562749	229572313
chr1	229973237	229976499
chr1	230037292	230047337
chr1	231178669	231183466
chr1	231294637	231303047
chr1	232761815	232765554
chr1	233460652	233463485
chr1	233464681	233469773
chr1	234314693	234318241
chr1	234347079	234353790
chr1	234395730	234399075
chr1	234428505	234432044
chr1	234455721	234466102
chr1	234481648	234492260
chr1	234498706	234506343
chr1	234912254	234930311
chr1	234931377	234934681
chr1	234942051	234956289
chr1	236303242	236305080
chr1	236554763	236562597
chr1	236634181	236636937
chr1	237085444	237088785
chr1	237199413	237227680
chr1	239546794	239554087
chr1	240252073	240261784
chr1	240347190	240348799
chr1	240771628	240779678
chr1	241128781	241134072
chr1	241239917	241244836
chr1	241515401	241523255
chr1	241579390	241593196
chr1	241600210	241605214
chr1	241685685	241701090
chr1	241703673	241713193
chr1	241720041	241725743
chr1	241812589	241816713
chr1	241832914	241838427
chr1	241839835	241845984
chr1	241846725	241855901
chr1	241873766	241882387
chr1	241885639	241889378
chr1	241891176	241908360
chr1	241911952	241916688
chr1	241942828	241948577
chr1	241966933	241967646
chr1	241971393	241985268
chr1	241995231	242008480
chr1	244080381	244085278
chr1	244173880	244177909
chr1	244201997	244210220
chr1	247596009	247600913
chr1	247993607	248004263
chr1	248005671	248009942
chr1	248026718	248030558
chr1	248440470	248444984
chr1	248609977	248616128
chr1	248643656	248645550
chr1	248861082	248864929
chr1	248867851	248873096
chr1	248893323	248899490
chr1	248902800	248908152
chr1	249064691	249071193
chr1	249075402	249082656
chr1	249090495	249100142
chr1	249125109	249129165
chr10	1281425	1283468
chr10	2813148	2817221
chr10	3216821	3222155
chr10	3224120	3227689
chr10	4727645	4745078
chr10	4755887	4767374
chr10	4778169	4781533
chr10	4791293	4802223
chr10	4818194	4821287
chr10	4831691	4833780
chr10	4861805	4873662
chr10	5038255	5043806
chr10	5053217	5056494
chr10	5319627	5324709
chr10	5387589	5409947
chr10	5541268	5545443
chr10	6083262	6091499
chr10	6099702	6100989
chr10	6110928	6119029
chr10	6123259	6126815
chr10	6174059	6184949
chr10	6351428	6357397
chr10	6443960	6447683
chr10	6450608	6450883
chr10	6452627	6461775
chr10	6472509	6477786
chr10	6512421	6519487
chr10	6531461	6537074
chr10	6538268	6540957
chr10	6553607	6562276
chr10	6572601	6583754
chr10	6603055	6611672
chr10	6617692	6627460
chr10	6665382	6668927
chr10	6749376	6756460
chr10	6777837	6781941
chr10	6803623	6810549
chr10	6961337	6965217
chr10	7450412	7458587
chr10	7704077	7713647
chr10	7761643	7764898
chr10	8066924	8069877
chr10	8072901	8097052
chr10	8100655	8119333
chr10	8339458	8343803
chr10	8550094	8554193
chr10	10837981	10841788
chr10	11864701	11869904
chr10	13416400	13420433
chr10	13422524	13428025
chr10	13475698	13487238
chr10	13523208	13527814
chr10	13532914	13540259
chr10	13565138	13570242
chr10	13571199	13576868
chr10	13578109	13588525
chr10	13612639	13616539
chr10	13623265	13626599
chr10	15482059	15484886
chr10	15726824	15729749
chr10	15757675	15766957
chr10	15906580	15913898
chr10	16424996	16427581
chr10	16462186	16466267
chr10	16471696	16475269
chr10	16558943	16574641
chr10	16610689	16614518
chr10	17327671	17335078
chr10	17351899	17356989
chr10	17483824	17486733
chr10	17491698	17499842
chr10	22629323	22640238
chr10	22761046	22767681
chr10	23443484	23466976
chr10	23470453	23492794
chr10	23569546	23574946
chr10	23577472	23582509
chr10	23620509	23623143
chr10	23980722	23987021
chr10	26219911	26228708
chr10	26496939	26514449
chr10	26556574	26560809
chr10	26725307	26732101
chr10	26844305	26861670
chr10	26878777	26882110
chr10	26903679	26917269
chr10	26965823	26972587
chr10	26978672	26982009
chr10	27170686	27175086
chr10	27727113	27730780
chr10	28028297	28039704
chr10	28284340	28288948
chr10	28523925	28530293
chr10	28540458	28545741
chr10	28594054	28597879
chr10	37204537	37230589
chr10	37233499	37246910
chr10	37263362	37268218
chr10	37290600	37298044
chr10	37402544	37406645
chr10	37429612	37446684
chr10	37452607	37457165
chr10	37461391	37469235
chr10	37472540	37483579
chr10	37746932	37749422
chr10	38891175	38893673
chr10	42646801	42650844
chr10	43152717	43156028
chr10	43180257	43183726
chr10	43243510	43263745
chr10	43347620	43351814
chr10	43354407	43363314
chr10	43427092	43431408
chr10	43570150	43576209
chr10	43591958	43596288
chr10	43759954	43768428
chr10	43770497	43774513
chr10	43782954	43786798
chr10	43797025	43801413
chr10	45865756	45870258
chr10	47651476	47654459
chr10	48439243	48444185
chr10	49728631	49735677
chr10	50595140	50611875
chr10	50815184	50826061
chr10	50840385	50850083
chr10	50855537	50858577
chr10	50873339	50878838
chr10	50884090	50888096
chr10	50897103	50900964
chr10	50980249	50984571
chr10	51487305	51492808
chr10	52493078	52496279
chr10	52593084	52598397
chr10	52652988	52657451
chr10	57608668	57612771
chr10	64554344	64561501
chr10	71314769	71321454
chr10	71325685	71343956
chr10	71349768	71353233
chr10	71354661	71359396
chr10	71437158	71441723
chr10	71459646	71464460
chr10	71557297	71563066
chr10	71745296	71748665
chr10	71810819	71818540
chr10	77054468	77057767
chr10	77187431	77191382
chr10	77208552	77214209
chr10	81659749	81673617
chr10	81738438	81747658
chr10	81890299	81894900
chr10	83631485	83637779
chr10	92614288	92623125
chr10	92918516	92921688
chr10	92922840	92927386
chr10	93043909	93048451
chr10	94831504	94838446
chr10	95751166	95756796
chr10	97474171	97478384
chr10	97851789	97885553
chr10	98823142	98825865
chr10	98831037	98834830
chr10	98868186	98872016
chr10	98929219	98961385
chr10	99529506	99538403
chr10	99730491	99737238
chr10	99787025	99795109
chr10	99871056	99882834
chr10	100227115	100232138
chr10	100989208	100998791
chr10	101086977	101094100
chr10	101206400	101218256
chr10	101227451	101230969
chr10	101234430	101237322
chr10	101278418	101281684
chr10	101284838	101305325
chr10	102049808	102053742
chr10	102055197	102068265
chr10	102069799	102075700
chr10	102222513	102230503
chr10	102323619	102340725
chr10	102354075	102361428
chr10	102368693	102387796
chr10	102390133	102399229
chr10	102406183	102454531
chr10	102463576	102537187
chr10	102547222	102553563
chr10	102556024	102564739
chr10	102573201	102596571
chr10	102597508	102609992
chr10	102618549	102622877
chr10	102625674	102630118
chr10	102632887	102637399
chr10	102833041	102836864
chr10	102843612	102852942
chr10	102865656	102871245
chr10	102881398	102893618
chr10	102894967	102899174
chr10	102901584	102911785
chr10	103531001	103535633
chr10	103994991	104001015
chr10	104170470	104176473
chr10	105823872	105834311
chr10	105840470	105846381
chr10	105858437	105863103
chr10	105926516	105929687
chr10	106396330	106406968
chr10	109672249	109677060
chr10	110669547	110675230
chr10	111213009	111219612
chr10	112400586	112404282
chr10	112832371	112837990
chr10	114074123	114081546
chr10	115798390	115803063
chr10	115804861	115810325
chr10	116160231	116166686
chr10	118027588	118036433
chr10	118992317	119010809
chr10	119284394	119316580
chr10	119488565	119497101
chr10	119512869	119516785
chr10	119518111	119523513
chr10	119562631	119566354
chr10	119585143	119591491
chr10	119643296	119652299
chr10	119663930	119671489
chr10	119991693	119995684
chr10	119997779	120032117
chr10	120129269	120133176
chr10	120170614	120175598
chr10	120215933	120220634
chr10	120224355	120228763
chr10	120233078	120237986
chr10	120352455	120356916
chr10	121769918	121775356
chr10	122188454	122192648
chr10	122213027	122220750
chr10	124468214	124482874
chr10	124583200	124589764
chr10	124636498	124640484
chr10	124868451	124879618
chr10	125183944	125191210
chr10	125297124	125301442
chr10	125326060	125332191
chr10	125338297	125343896
chr10	125359056	125362827
chr10	125377264	125386995
chr10	125398488	125408083
chr10	125422712	125431002
chr10	125431831	125440390
chr10	125446741	125452039
chr10	125452830	125456431
chr10	125464003	125467931
chr10	125502041	125506168
chr10	125518115	125527782
chr10	125540036	125545179
chr10	125564733	125568365
chr10	125593088	125598505
chr10	125725367	125731694
chr10	127608050	127611844
chr10	129531078	129540248
chr10	130062118	130065509
chr10	130072251	130075552
chr10	130823820	130834504
chr10	131205821	131209845
chr10	131754026	131760782
chr10	131762889	131776025
chr10	132157536	132159037
chr10	132238312	132247475
chr10	132270000	132275399
chr10	132311509	132327561
chr10	132548042	132552547
chr10	132568111	132574948
chr10	132577952	132581626
chr10	132583086	132586951
chr10	132593403	132612939
chr10	132677849	132685638
chr10	132702526	132708867
chr10	133114164	133120994
chr10	133122917	133126254
chr10	133154441	133159836
chr10	133167263	133171124
chr10	133227938	133240091
chr10	133249902	133256034
chr10	133311988	133321648
chr10	133324787	133340325
chr10	133342993	133361724
chr10	133441293	133445885
chr10	133481566	133485921
chr10	133633857	133638686
chr10	133645631	133652183
chr10	133836630	133853306
chr10	133855234	133861459
chr10	133994536	134000358
chr10	134600231	134612262
chr10	134617723	134633601
chr10	134641344	134648694
chr10	134651340	134654959
chr10	134660972	134670891
chr10	134683474	134695176
chr10	134695947	134701701
chr10	134702581	134712596
chr10	134713396	134721727
chr10	134768858	134770084
chr10	134771677	134773209
chr10	134774800	134784553
chr10	134794395	134802805
chr10	134808390	134813249
chr10	134841942	134852837
chr10	134859407	134863327
chr10	134901484	134906231
chr10	134969743	134982798
chr10	135005082	135011010
chr10	135016942	135021034
chr10	135026180	135031416
chr10	135036833	135043757
chr10	135045059	135057581
chr10	135142621	135151325
chr10	135152270	135159613
chr10	135324391	135346193
chr10	135401201	135407232
chr10	135412413	135416762
chr10	135418185	135423955
chr10	135425121	135429415
chr10	135436999	135464270
chr10	135469647	135478861
chr11	88107	97340
chr11	105012	113661
chr11	176908	179766
chr11	181530	187358
chr11	192729	196473
chr11	267571	289133
chr11	412598	420035
chr11	423009	428073
chr11	433647	438139
chr11	1217640	1222580
chr11	1234064	1245645
chr11	1250353	1255785
chr11	1274417	1278851
chr11	1342308	1346643
chr11	1359507	1366495
chr11	1374643	1379884
chr11	1393097	1403722
chr11	1564233	1570230
chr11	1589554	1592955
chr11	1594076	1598592
chr11	1609044	1625226
chr11	1627536	1631137
chr11	1633109	1635780
chr11	1643362	1650019
chr11	1651465	1655130
chr11	1678846	1684505
chr11	1692668	1698828
chr11	1706117	1712557
chr11	1829900	1833810
chr11	2023716	2028645
chr11	2152110	2159381
chr11	2160765	2172230
chr11	2285778	2295390
chr11	2297023	2303917
chr11	2305041	2310086
chr11	2458327	2474599
chr11	2525275	2528132
chr11	2884327	2885993
chr11	2888278	2893625
chr11	3412470	3417216
chr11	3566629	3569939
chr11	3590416	3595996
chr11	3599001	3609934
chr11	3668154	3673073
chr11	3674510	3676683
chr11	4227230	4236007
chr11	4242056	4245739
chr11	4249195	4256169
chr11	4261044	4268882
chr11	4306553	4310191
chr11	4338270	4342800
chr11	4344305	4350798
chr11	4356766	4359996
chr11	4396190	4402210
chr11	4514349	4520514
chr11	5319689	5328216
chr11	5824220	5833985
chr11	6091484	6096991
chr11	6160870	6165161
chr11	6274596	6290671
chr11	6296996	6312609
chr11	6323418	6340522
chr11	6350386	6356296
chr11	6357112	6362496
chr11	6384913	6400638
chr11	6708997	6723181
chr11	6761875	6769844
chr11	6789706	6794018
chr11	6809962	6815833
chr11	6946265	6951197
chr11	7011535	7016480
chr11	7049070	7055171
chr11	7120433	7126448
chr11	7270075	7276848
chr11	7693827	7706301
chr11	7710088	7716007
chr11	7718140	7721976
chr11	7857903	7863317
chr11	7866906	7882680
chr11	7897323	7905085
chr11	7906572	7914721
chr11	7923043	7934046
chr11	7960076	7964040
chr11	7977560	7983258
chr11	7987628	7990697
chr11	7995657	7999613
chr11	8035165	8043042
chr11	8045793	8051686
chr11	8188954	8192390
chr11	8287827	8295901
chr11	13980358	13989344
chr11	14986924	15001848
chr11	15761873	15765215
chr11	15766536	15770519
chr11	15772068	15777121
chr11	17638103	17641267
chr11	17711512	17720259
chr11	17731582	17750524
chr11	18058850	18065030
chr11	18066044	18069428
chr11	18169918	18174333
chr11	18189640	18193839
chr11	18195313	18200159
chr11	18211712	18215809
chr11	18256577	18260943
chr11	18266560	18274381
chr11	18277604	18282029
chr11	18660794	18669930
chr11	18686757	18691812
chr11	18725189	18731872
chr11	18741064	18745233
chr11	18808610	18818550
chr11	18927762	18938326
chr11	18942878	18947430
chr11	18949879	18961296
chr11	18989364	18992034
chr11	19363490	19372276
chr11	20169856	20190716
chr11	20195543	20202451
chr11	20221114	20229944
chr11	20299396	20303252
chr11	20356040	20364043
chr11	20613773	20633598
chr11	22214570	22216858
chr11	22358978	22370241
chr11	22452614	22456017
chr11	22683503	22694718
chr11	22970478	22973852
chr11	23251153	23259069
chr11	25537589	25542380
chr11	26352685	26356992
chr11	26531568	26534781
chr11	26589470	26597324
chr11	26615743	26621708
chr11	26646884	26651478
chr11	27715975	27729095
chr11	27732211	27747634
chr11	27782262	27787118
chr11	27899616	27903434
chr11	27930974	27934841
chr11	28825566	28828973
chr11	30033393	30042209
chr11	32379777	32382845
chr11	32429953	32450271
chr11	32453285	32468622
chr11	32531309	32535830
chr11	32548724	32552595
chr11	32810509	32816991
chr11	33398437	33403645
chr11	33499678	33503758
chr11	33805556	33809455
chr11	33819457	33827848
chr11	33836833	33855197
chr11	36394433	36401217
chr11	36590283	36594770
chr11	36609750	36614743
chr11	36804017	36808808
chr11	36812093	36817042
chr11	41479551	41483178
chr11	43056266	43060449
chr11	43289228	43291559
chr11	43299534	43309446
chr11	43544192	43546559
chr11	43552631	43556136
chr11	43573926	43582247
chr11	43593062	43623639
chr11	43644497	43665792
chr11	43684832	43693078
chr11	44321299	44362222
chr11	44381471	44385546
chr11	44417311	44421422
chr11	44745333	44748412
chr11	44897433	44901849
chr11	45303359	45310247
chr11	45681793	45691154
chr11	45774863	45779085
chr11	49000447	49011606
chr11	49048830	49053959
chr11	49102723	49107339
chr11	49227217	49232090
chr11	49580648	49583801
chr11	49672529	49675427
chr11	49854305	49862657
chr11	55645984	55650609
chr11	56672377	56676415
chr11	56995609	57000941
chr11	57155786	57159482
chr11	57413295	57417406
chr11	58264027	58267576
chr11	58278608	58282958
chr11	58828444	58832724
chr11	58940011	58943307
chr11	59253247	59256187
chr11	59267053	59271356
chr11	59286838	59294007
chr11	59441173	59446493
chr11	59481336	59490901
chr11	59596243	59605344
chr11	60405107	60410445
chr11	60943878	60946593
chr11	60968901	60974525
chr11	60976356	60990479
chr11	60994778	61005335
chr11	61007145	61011892
chr11	61321398	61325949
chr11	61345449	61348315
chr11	61356255	61360153
chr11	61938398	61943747
chr11	61980557	61984150
chr11	62066108	62072502
chr11	62080341	62085530
chr11	62101989	62106687
chr11	63255119	63260921
chr11	63376777	63382492
chr11	64258042	64261663
chr11	64292645	64293989
chr11	64406870	64415169
chr11	64442494	64447071
chr11	64481175	64492446
chr11	64507235	64512210
chr11	64709180	64712911
chr11	66156273	66163564
chr11	66167173	66176028
chr11	66207176	66211475
chr11	66219594	66225415
chr11	67327999	67334282
chr11	67383595	67386711
chr11	67417325	67424076
chr11	67426158	67430107
chr11	67437279	67467102
chr11	67471683	67476039
chr11	67478247	67480310
chr11	67482312	67500458
chr11	67502161	67509661
chr11	67526575	67535257
chr11	67609187	67615547
chr11	67616481	67621075
chr11	67648682	67657567
chr11	67718260	67731577
chr11	67734925	67754384
chr11	69829101	69833387
chr11	69920697	69924394
chr11	70506627	70510437
chr11	70515517	70518746
chr11	70558281	70563656
chr11	70669504	70674275
chr11	70957467	70962571
chr11	70963949	70967426
chr11	71301614	71306815
chr11	71308091	71328550
chr11	71339225	71353769
chr11	71453625	71457478
chr11	71953435	71957556
chr11	72170448	72175396
chr11	72177266	72184564
chr11	72198038	72201772
chr11	72228207	72233298
chr11	72250550	72253227
chr11	72276014	72279289
chr11	72290907	72310757
chr11	72316337	72319609
chr11	72346191	72353491
chr11	72383406	72391722
chr11	72975257	72978536
chr11	74438723	74442349
chr11	74782687	74786550
chr11	74798483	74799968
chr11	74802450	74813036
chr11	74948867	74951932
chr11	74952918	74957691
chr11	75374365	75384236
chr11	75385726	75390411
chr11	79144355	79156462
chr11	82439756	82443654
chr11	82444671	82447250
chr11	89380101	89387358
chr11	89510453	89513157
chr11	89531190	89539403
chr11	89581510	89589125
chr11	89596205	89601455
chr11	89643370	89649316
chr11	89661311	89666237
chr11	89707924	89713474
chr11	89724486	89729977
chr11	89804308	89807194
chr11	89817721	89821641
chr11	89866038	89870361
chr11	89881987	89886392
chr11	93968211	93972500
chr11	94131635	94135936
chr11	100991698	101002444
chr11	101321726	101326448
chr11	101451004	101458917
chr11	102698901	102703648
chr11	102711633	102717527
chr11	106889177	106894289
chr11	107459009	107467018
chr11	109290731	109296481
chr11	111376714	111392680
chr11	111398982	111408695
chr11	111409531	111415440
chr11	113340733	113349534
chr11	113775205	113781881
chr11	113847720	113857371
chr11	113924618	113934348
chr11	113980073	113983395
chr11	114008147	114014797
chr11	114098223	114103781
chr11	114113293	114117293
chr11	114130299	114135524
chr11	115527629	115532540
chr11	116370571	116374804
chr11	116447997	116452791
chr11	117849510	117852788
chr11	117854837	117860356
chr11	117915556	117918891
chr11	117996327	118002179
chr11	118006808	118016746
chr11	118019813	118030722
chr11	118075318	118095984
chr11	118096745	118100999
chr11	118104766	118119191
chr11	118129908	118141898
chr11	118143774	118148965
chr11	118155464	118159566
chr11	118160790	118167753
chr11	118171140	118177086
chr11	118182534	118195393
chr11	118217673	118221471
chr11	119612150	119614634
chr11	120017191	120022647
chr11	120434687	120437236
chr11	120855562	120858841
chr11	122730775	122796603
chr11	122799695	122810739
chr11	122820814	122840631
chr11	122842163	122859012
chr11	122861411	122871765
chr11	122874919	122879193
chr11	122883441	122887903
chr11	123062322	123065370
chr11	123082147	123085986
chr11	123221949	123233567
chr11	123427289	123433726
chr11	123515953	123527514
chr11	123552178	123566363
chr11	123627571	123629758
chr11	123645703	123650922
chr11	123673991	123680373
chr11	123728679	123732491
chr11	123912443	123920250
chr11	123921281	123925857
chr11	123937353	123941230
chr11	123943382	123948956
chr11	123955263	123958929
chr11	123961684	123968091
chr11	124060108	124064389
chr11	124069741	124076437
chr11	124281377	124292515
chr11	124310535	124315150
chr11	124335436	124345700
chr11	124381899	124384272
chr11	124385239	124394546
chr11	124413635	124422234
chr11	124426504	124444491
chr11	124450427	124456770
chr11	124458269	124468437
chr11	124585935	124593977
chr11	124609666	124621398
chr11	124703279	124712986
chr11	124717971	124724402
chr11	124728036	124743473
chr11	124931956	124936922
chr11	125634726	125639100
chr11	128552578	128568248
chr11	128756523	128760816
chr11	129171410	129174010
chr11	129232670	129260067
chr11	129611689	129615453
chr11	129680866	129689573
chr11	130293744	130302302
chr11	131615103	131617719
chr11	131652643	131657185
chr11	132814224	132816861
chr11	132862786	132866150
chr11	132948400	132951708
chr11	133521518	133525059
chr11	134141241	134151260
chr11	134277281	134289122
chr11	134334035	134343953
chr11	134706272	134712733
chr11	134751934	134754913
chr12	64525	72324
chr12	146171	150477
chr12	160143	170466
chr12	171834	175673
chr12	182532	186986
chr12	310820	313607
chr12	336686	342260
chr12	563660	572743
chr12	1927802	1934660
chr12	1940020	1943456
chr12	2163256	2167380
chr12	2800405	2804393
chr12	3473697	3479504
chr12	3597094	3605366
chr12	3645734	3649261
chr12	3757393	3762562
chr12	3988311	3998670
chr12	4021826	4025825
chr12	4028626	4033819
chr12	4040508	4044812
chr12	4079159	4083855
chr12	4138633	4142886
chr12	4272556	4276488
chr12	4301195	4308972
chr12	4316515	4321031
chr12	4332923	4338509
chr12	4340669	4345064
chr12	4359227	4363907
chr12	4365876	4390208
chr12	4390977	4404261
chr12	4407365	4417150
chr12	4471043	4473621
chr12	4501600	4512523
chr12	4684806	4688001
chr12	4689881	4694034
chr12	4699282	4702573
chr12	4708473	4712461
chr12	4915178	4921346
chr12	4924428	4929384
chr12	4935677	4940120
chr12	4971937	4976547
chr12	5016890	5024128
chr12	5149578	5153438
chr12	5154499	5159799
chr12	5535969	5546279
chr12	5555019	5560487
chr12	5586954	5589810
chr12	5740246	5743922
chr12	5935226	5941244
chr12	6050936	6058049
chr12	6183181	6186289
chr12	7386113	7390471
chr12	7445767	7459805
chr12	7519509	7526966
chr12	7528369	7531631
chr12	7581730	7585882
chr12	7589886	7598605
chr12	7788371	7796118
chr12	7826731	7830750
chr12	8538782	8543625
chr12	8546927	8549656
chr12	8550375	8558472
chr12	8598463	8604656
chr12	8652882	8657226
chr12	8665607	8675701
chr12	8686221	8688901
chr12	9379465	9383037
chr12	9384941	9399397
chr12	9402615	9407072
chr12	9411985	9414916
chr12	9419782	9423899
chr12	9426225	9433679
chr12	9875242	9879358
chr12	9882056	9895311
chr12	9896127	9901433
chr12	9904804	9908210
chr12	9910262	9923980
chr12	9936028	9943763
chr12	9944681	9948372
chr12	9949696	9953440
chr12	9961053	9966085
chr12	9987958	9990425
chr12	10015228	10024303
chr12	10031642	10035376
chr12	10045416	10049127
chr12	10052124	10056715
chr12	10081868	10085987
chr12	10092892	10099169
chr12	10148746	10152688
chr12	10161872	10166671
chr12	10193746	10197253
chr12	10240709	10252901
chr12	10278386	10282779
chr12	10309371	10312937
chr12	10317747	10323030
chr12	10646741	10652653
chr12	10768411	10776717
chr12	10783041	10794144
chr12	10802055	10808063
chr12	10809812	10835733
chr12	10883963	10889855
chr12	10916201	10929518
chr12	10949616	10954788
chr12	11377588	11382379
chr12	11581387	11585611
chr12	11595177	11599647
chr12	11617527	11622321
chr12	11632647	11645704
chr12	11660393	11663972
chr12	11669202	11675013
chr12	11676429	11680528
chr12	14131903	14137294
chr12	16756552	16764179
chr12	25311235	25318805
chr12	40615368	40618709
chr12	45266154	45268750
chr12	45436535	45448028
chr12	47467105	47473491
chr12	48568074	48574847
chr12	48576648	48589864
chr12	48605528	48616997
chr12	48625976	48632370
chr12	48637009	48642235
chr12	48644986	48661128
chr12	48681597	48688106
chr12	48689378	48693718
chr12	48700578	48704315
chr12	48754402	48761722
chr12	48878325	48883503
chr12	48887462	48891274
chr12	48914946	48918966
chr12	48991242	48995078
chr12	49012463	49015658
chr12	49131234	49134359
chr12	49284705	49287810
chr12	49362085	49378937
chr12	49484141	49488789
chr12	52484180	52486801
chr12	52490463	52502004
chr12	52992932	52998926
chr12	53083280	53086787
chr12	53105777	53111297
chr12	53182607	53186078
chr12	54939635	54952120
chr12	54955729	54960158
chr12	54977752	54988623
chr12	55000159	55013909
chr12	55038645	55041997
chr12	55092292	55096516
chr12	55412100	55415462
chr12	55430781	55435619
chr12	55540251	55545075
chr12	55569921	55572382
chr12	55785903	55788920
chr12	55807631	55810586
chr12	56013157	56018068
chr12	56032590	56037902
chr12	56240651	56245216
chr12	57865625	57876363
chr12	58031087	58035373
chr12	58131986	58134661
chr12	59987067	59994549
chr12	61301785	61305380
chr12	61906904	61910006
chr12	62505676	62510836
chr12	62520043	62525803
chr12	62571816	62576540
chr12	62580797	62589027
chr12	62603954	62609985
chr12	63498527	63504545
chr12	63520735	63524231
chr12	63535029	63547490
chr12	63548827	63554831
chr12	63557102	63561575
[truncated: 8,057 more rows]

## Sheet: DIPG13 H3K27me3
Chromosome	Start position	End position
chr1	51888	66250
chr1	80944	89832
chr1	119426	126170
chr1	586375	597080
chr1	812840	822802
chr1	829140	834442
chr1	849757	856424
chr1	859610	869657
chr1	3566632	3578571
chr1	6474447	6485095
chr1	7994459	8010408
chr1	9258258	9265492
chr1	17210468	17218733
chr1	18953132	18974865
chr1	24823269	24846831
chr1	24848287	24856433
chr1	24861002	24873483
chr1	25244111	25261268
chr1	26369066	26379049
chr1	32017144	32023124
chr1	38093657	38104490
chr1	40189009	40202372
chr1	44859010	44860482
chr1	44864053	44890409
chr1	46951739	46960480
chr1	47687669	47705631
chr1	47904636	47915303
chr1	50877042	50897979
chr1	51443936	51452249
chr1	60280948	60299030
chr1	60306061	60320778
chr1	60321817	60339542
chr1	60390504	60404079
chr1	60406197	60412534
chr1	63346226	63353216
chr1	63737685	63744531
chr1	63777636	63801649
chr1	65989295	65995024
chr1	67767824	67775913
chr1	75591554	75607435
chr1	81694268	81709614
chr1	82270869	82277509
chr1	82388612	82397065
chr1	82398661	82405659
chr1	85163809	85171490
chr1	85510085	85517759
chr1	85660909	85673010
chr1	91169129	91200025
chr1	91292804	91309637
chr1	92941816	92957892
chr1	94699605	94705004
chr1	95002011	95013700
chr1	95283255	95291866
chr1	110004181	110017384
chr1	110608229	110618890
chr1	110622788	110631126
chr1	116377207	116386425
chr1	119515963	119553684
chr1	120192328	120203278
chr1	121134007	121141500
chr1	143727097	143743905
chr1	144324437	144339684
chr1	144503687	144512499
chr1	144515042	144520093
chr1	145070105	145083427
chr1	145097097	145125887
chr1	145963733	145974334
chr1	146543429	146558946
chr1	147504001	147516382
chr1	147804745	147810915
chr1	147915508	147931124
chr1	148607790	148615323
chr1	148675569	148684072
chr1	148838355	148847169
chr1	148851082	148868538
chr1	149004513	149009956
chr1	149577529	149591875
chr1	149717330	149722900
chr1	150674268	150685835
chr1	154460968	154478377
chr1	155087795	155096986
chr1	156887832	156895460
chr1	161530236	161545027
chr1	161611471	161625784
chr1	161650244	161659757
chr1	161698151	161708731
chr1	165319021	165327960
chr1	168106349	168111883
chr1	169550223	169556224
chr1	178682387	178689460
chr1	180190783	180213784
chr1	184939142	184945744
chr1	197215232	197228419
chr1	197234014	197261655
chr1	197866001	197912067
chr1	199995047	200027734
chr1	200030531	200046625
chr1	200208230	200222049
chr1	200268558	200275886
chr1	202963527	202967819
chr1	203074528	203084214
chr1	205182757	205195676
chr1	205534334	205542016
chr1	210403264	210413825
chr1	212714804	212736090
chr1	212737222	212765571
chr1	212769609	212782339
chr1	212866446	212880753
chr1	213198746	213207820
chr1	214357487	214365925
chr1	216892786	216899711
chr1	218329469	218344898
chr1	221060403	221069946
chr1	231558472	231563568
chr1	233445862	233454347
chr1	236836161	236848134
chr1	237205668	237211525
chr1	240158197	240166141
chr1	241684469	241693728
chr1	244197044	244211082
chr10	1961986	1966361
chr10	3216808	3222026
chr10	7450412	7458646
chr10	7478482	7485795
chr10	7704567	7709348
chr10	8071590	8120552
chr10	11865788	11876568
chr10	13579467	13585295
chr10	16554569	16562351
chr10	16563387	16567973
chr10	17492578	17496012
chr10	22625577	22646488
chr10	22651075	22686427
chr10	22702346	22709660
chr10	22714463	22736938
chr10	23070124	23085882
chr10	23265407	23273642
chr10	23277693	23288769
chr10	23478256	23495038
chr10	26223798	26230546
chr10	26499699	26514304
chr10	28030921	28038809
chr10	37056854	37063914
chr10	42669089	42673234
chr10	46605693	46614232
chr10	48789976	48801211
chr10	50596016	50610932
chr10	62488137	62492978
chr10	81654037	81677085
chr10	90961025	90971706
chr10	93161179	93168684
chr10	94447128	94467225
chr10	97858323	97888016
chr10	100988951	100999075
chr10	101276722	101303863
chr10	102412830	102420454
chr10	102479899	102514724
chr10	102584687	102591934
chr10	102659681	102666546
chr10	102878481	102910559
chr10	102974847	103006380
chr10	103007799	103012408
chr10	103466038	103474614
chr10	105702439	105709599
chr10	105715878	105722237
chr10	105873051	105880921
chr10	106124175	106140773
chr10	112398495	112412226
chr10	115968625	115974579
chr10	115976196	115985014
chr10	115997021	116004666
chr10	118886694	118904486
chr10	118914335	118933286
chr10	119285580	119314943
chr10	119996526	120004497
chr10	120007907	120018631
chr10	124891938	124913329
chr10	126108750	126115162
chr10	126132420	126145903
chr10	130823787	130835330
chr10	131748339	131771048
chr10	135044713	135048106
chr10	135049372	135053366
chr11	1692864	1698427
chr11	2161156	2166834
chr11	14991829	14999513
chr11	20178512	20187445
chr11	20613845	20630757
chr11	22358207	22375664
chr11	22684720	22693890
chr11	32442303	32472406
chr11	33810848	33828804
chr11	33842784	33851690
chr11	33882207	33890772
chr11	43601734	43608555
chr11	43641572	43647646
chr11	43657031	43664759
chr11	44322386	44345436
chr11	44353771	44362030
chr11	65550370	65579118
chr11	67457013	67465125
chr11	69514522	69524970
chr11	69584141	69588977
chr11	74114119	74124967
chr11	75338414	75348930
chr11	75352486	75357682
chr11	82856813	82866953
chr11	94958501	94964138
chr11	95435587	95448611
chr11	98887996	98898127
chr11	100992786	101003571
chr11	107462126	107469271
chr11	111171348	111179617
chr11	111372644	111395622
chr11	111400293	111411119
chr11	112046143	112051343
chr11	113774005	113781732
chr11	115377232	115387454
chr11	118108839	118115633
chr11	118132672	118139579
chr11	118590508	118599263
chr11	121152693	121163399
chr11	122174029	122188596
chr11	122842846	122857899
chr11	124583518	124594707
chr11	124709530	124724135
chr11	124731493	124742250
chr11	125921776	125932396
chr11	128139826	128158187
chr11	128544669	128573629
chr11	129235243	129265617
chr11	129919266	129935456
chr12	4368960	4378585
chr12	4738763	4748663
chr12	5018912	5028131
chr12	9428473	9435122
chr12	10646148	10654460
chr12	10876384	10887766
chr12	11668996	11674253
chr12	16753333	16765197
chr12	27677403	27685848
chr12	28096839	28134106
chr12	31478746	31487881
chr12	45436583	45448789
chr12	47220723	47227899
chr12	48398646	48414718
chr12	49363879	49380446
chr12	54315549	54449154
chr12	54844969	54860512
chr12	55411447	55419195
chr12	59308760	59314492
chr12	62580195	62586070
chr12	65168866	65183289
chr12	65509396	65517852
chr12	65532920	65558083
chr12	65667768	65675852
chr12	66111672	66127893
chr12	69720464	69729438
chr12	70753519	70764187
chr12	80075010	80088069
chr12	85629567	85704108
chr12	85723996	85729902
chr12	93442382	93451701
chr12	93964157	93993068
chr12	95264376	95270835
chr12	95603243	95610361
chr12	95938366	95942829
chr12	96178823	96190210
chr12	100374105	100378413
chr12	103723378	103734085
chr12	108235463	108242708
chr12	109742606	109754688
chr12	109788177	109802123
chr12	113900108	113918811
chr12	114831135	114853284
chr12	115101704	115133172
chr12	120808341	120816420
chr12	131449818	131456610
chr12	132654292	132662862
chr12	132957059	132965598
chr12	133178180	133184612
chr13	20729128	20738171
chr13	20761247	20771633
chr13	28489535	28506212
chr13	28525670	28557031
chr13	46422221	46429199
chr13	46781151	46788603
chr13	72434777	72439201
chr13	73627864	73641997
chr13	79151747	79186577
chr13	91961503	91970601
chr13	91991840	91999618
chr13	100308349	100322144
chr13	100336951	100345744
chr13	100509284	100529963
chr13	100605087	100653476
chr13	102569481	102575575
chr13	112060538	112071724
chr13	113247828	113259839
chr13	113287774	113295058
chr14	19642519	19649380
chr14	19925962	19932812
chr14	21093622	21101428
chr14	22948540	22953391
chr14	23645917	23657475
chr14	29223308	29255138
chr14	35996526	36002835
chr14	36478981	36501951
chr14	36737393	36747985
chr14	36829515	36842065
chr14	36888589	36893736
chr14	36901747	36910517
chr14	36959678	36967435
chr14	36968918	36996275
chr14	37047387	37058206
chr14	37116169	37137958
chr14	37142105	37148297
chr14	38043444	38073817
chr14	57259738	57288663
chr14	60548869	60557771
chr14	60810423	60824996
chr14	60948192	60955765
chr14	60967197	60982186
chr14	61095242	61135831
chr14	61720819	61728937
chr14	61743274	61747930
chr14	65336711	65343020
chr14	65346680	65357062
chr14	74703695	74715492
chr14	76838957	76847511
chr14	89254411	89258757
chr14	92410510	92417341
chr14	94641322	94646650
chr14	95228135	95245251
chr14	104406114	104410986
chr14	105498398	105511255
chr15	20114674	20118853
chr15	20861929	20867599
chr15	20887762	20894625
chr15	21891877	21904580
chr15	21928077	21937883
chr15	22372645	22383065
chr15	22455855	22461015
chr15	22567866	22579490
chr15	23131885	23147104
chr15	23204619	23212283
chr15	28976334	28987542
chr15	29042806	29061019
chr15	30385268	30389869
chr15	33003191	33015787
chr15	34783969	34788492
chr15	34897933	34910855
chr15	39453690	39462772
chr15	40214311	40223992
chr15	41516520	41521554
chr15	45403675	45409133
chr15	51382200	51386865
chr15	51526992	51531932
chr15	52033133	52043543
chr15	53072823	53102111
chr15	58350066	58363138
chr15	59990073	59998610
chr15	60288981	60306473
chr15	60878542	60883789
chr15	62352573	62361658
chr15	62451278	62460881
chr15	62570310	62582601
chr15	68112185	68126913
chr15	68545941	68550750
chr15	68554133	68561306
chr15	69132164	69143002
chr15	76077994	76084095
chr15	76087921	76094622
chr15	76611257	76623075
chr15	76625681	76638282
chr15	77209025	77224095
chr15	78630866	78638817
chr15	78850999	78857995
chr15	78859535	78866277
chr15	78910900	78918159
chr15	83945730	83958851
chr15	84030537	84037649
chr15	90720979	90727797
chr15	96945210	96971491
chr15	97487672	97496153
chr15	99080786	99092245
chr15	99122186	99137532
chr15	99157894	99190661
chr15	100302357	100309972
chr15	100459773	100466476
chr15	101416512	101428429
chr15	101459824	101463985
chr15	101494029	101508740
chr15	101511255	101517189
chr16	197379	203618
chr16	215039	228863
chr16	1308884	1312895
chr16	1332804	1349557
chr16	1922762	1929320
chr16	1964281	1971873
chr16	2391708	2397310
chr16	2838641	2847142
chr16	3079432	3101960
chr16	3125981	3131928
chr16	3216053	3235186
chr16	21287643	21297664
chr16	21301732	21308426
chr16	21844946	21849838
chr16	24599366	24613639
chr16	24615040	24621488
chr16	32093152	32099962
chr16	32122884	32130535
chr16	32133599	32140418
chr16	32807283	32810706
chr16	32820162	32827191
chr16	33036509	33043959
chr16	33066697	33070540
chr16	33079826	33086085
chr16	51801995	51806673
chr16	53402104	53409804
chr16	55215949	55225932
chr16	55349908	55359666
chr16	55393897	55407919
chr16	55557170	55577049
chr16	56218274	56225180
chr16	57523138	57530727
chr16	57616498	57621286
chr16	57742523	57749137
chr16	62063884	62070432
chr16	66785883	66793614
chr16	66795739	66800722
chr16	66821857	66827012
chr16	70119890	70132993
chr16	70846601	70853038
chr16	73075192	73106060
chr16	73193975	73206030
chr16	73572288	73589192
chr16	73600727	73613177
chr16	73641649	73656171
chr16	73691639	73699145
chr16	73702305	73716375
chr16	73723300	73741421
chr16	73907241	73935044
chr16	74568783	74573917
chr16	76585244	76590528
chr16	76606820	76623650
chr16	79315847	79320941
chr16	81469949	81477685
chr16	82207296	82215011
chr16	84190884	84200012
chr16	85208623	85215733
chr16	85225031	85235758
chr16	85929010	85936566
chr16	86222132	86236974
chr16	86318029	86328489
chr16	86524225	86560676
chr16	86597493	86617967
chr16	86623158	86634565
chr16	87096812	87104551
chr16	88748763	88757926
chr16	89067222	89073005
chr16	90182825	90187990
chr16	90248088	90257150
chr17	1126397	1136688
chr17	3864715	3872888
chr17	4539132	4549692
chr17	6730615	6744337
chr17	7962007	7967280
chr17	15230721	15235384
chr17	15242039	15255161
chr17	16567368	16588076
chr17	18316743	18323543
chr17	18358827	18366706
chr17	18505109	18512784
chr17	18739801	18746249
chr17	20428515	20434755
chr17	20749972	20760043
chr17	26629385	26641484
chr17	28432890	28437867
chr17	28557100	28564128
chr17	30414335	30428873
chr17	31027964	31041321
chr17	31082903	31108363
chr17	31150138	31159704
chr17	33767512	33779445
chr17	33812255	33828721
chr17	34109969	34126889
chr17	35281451	35305672
chr17	36098016	36110110
chr17	36298173	36306211
chr17	37750976	37768528
chr17	37890884	37900670
chr17	37929207	37937160
chr17	38015824	38030377
chr17	38032186	38038240
chr17	38813959	38821854
chr17	38826898	38831709
chr17	38851370	38859180
chr17	38925824	38940324
chr17	41856790	41864144
chr17	42003126	42008713
chr17	42076992	42084703
chr17	42903498	42911626
chr17	44345999	44355150
chr17	44893416	44900074
chr17	45922637	45938601
chr17	46108713	46120056
chr17	46215798	46232082
chr17	46236229	46248518
chr17	46323511	46327780
chr17	46368210	46373892
chr17	46616213	46625827
chr17	46628600	46726250
chr17	46794120	46836619
chr17	47061179	47095868
chr17	48038197	48057543
chr17	48065265	48073871
chr17	55042675	55055409
chr17	56095161	56102115
chr17	56114902	56122785
chr17	56224279	56231221
chr17	56233750	56240211
chr17	56330366	56342862
chr17	56364207	56375314
chr17	56465038	56502454
chr17	58177216	58182476
chr17	59232458	59240411
chr17	59471439	59487039
chr17	59524963	59541136
chr17	59607882	59613173
chr17	59632011	59636183
chr17	62201283	62206986
chr17	66187523	66200729
chr17	68165597	68171171
chr17	72856205	72860104
chr17	72886528	72894478
chr17	74069556	74076760
chr17	74575949	74592041
chr17	77015553	77021278
chr17	78978109	78984253
chr17	80326996	80339920
chr18	901476	913475
chr18	2641448	2645768
chr18	2649107	2655464
chr18	2844158	2854650
chr18	6408236	6414841
chr18	6431053	6436537
chr18	12069902	12076498
chr18	19740337	19782992
chr18	19925963	19931153
chr18	21586161	21594035
chr18	22932414	22941950
chr18	28613812	28626470
chr18	32551723	32565260
chr18	32595687	32606640
chr18	32813066	32819864
chr18	41646059	41657897
chr18	44765749	44784131
chr18	44786316	44792276
chr18	47085477	47092640
chr18	55088130	55102599
chr18	55465197	55473834
chr18	55711859	55717699
chr18	56027780	56032729
chr18	56061739	56070439
chr18	56767242	56778601
chr18	56886766	56892167
chr18	56929850	56967271
chr18	56970406	56987897
chr18	57026839	57031688
chr18	57563447	57579852
chr18	59984513	60002352
chr18	71966323	71978214
chr18	72020287	72027213
chr18	74208596	74218646
chr18	74229197	74235319
chr18	75445359	75455550
chr18	75889632	75897573
chr18	75900207	75909505
chr19	1746146	1766938
chr19	6105502	6110183
chr19	6596377	6602561
chr19	7840133	7850222
chr19	8863986	8889598
chr19	9825109	9835464
chr19	10621190	10635519
chr19	11527391	11534657
chr19	18717800	18722458
chr19	18896664	18906063
chr19	42025388	42033429
chr19	42052894	42057182
chr19	42413991	42422327
chr19	42432872	42443973
chr19	45717796	45726926
chr19	46101363	46108264
chr19	48410676	48420947
chr19	48448343	48465531
chr19	49921658	49944636
chr19	50597077	50626991
chr19	50637452	50642870
chr19	51234301	51246242
chr19	52223371	52229593
chr19	55631853	55644338
chr19	56259329	56287290
chr2	942239	951595
chr2	2324091	2331747
chr2	10220546	10226743
chr2	10854584	10866768
chr2	20862066	20875088
chr2	27176501	27182962
chr2	27506844	27516536
chr2	37552037	37574081
chr2	37625909	37635367
chr2	42387919	42395934
chr2	45025874	45037541
chr2	45150256	45183545
chr2	45225693	45241054
chr2	45389801	45402561
chr2	45856552	45864010
chr2	54578340	54586373
chr2	54600457	54607164
chr2	54951243	54957055
chr2	60782594	60800523
chr2	63277856	63297609
chr2	64873672	64885992
chr2	64988320	64998916
chr2	66642481	66657244
chr2	66803347	66813997
chr2	70770475	70781060
chr2	71110213	71140659
chr2	71175501	71184318
chr2	73138177	73155901
chr2	74723576	74730869
chr2	85103285	85112291
chr2	88746053	88751777
chr2	90410195	90416235
chr2	90441478	90450422
chr2	91631264	91638423
chr2	91663377	91671230
chr2	91990913	92001963
chr2	92227060	92236876
chr2	95520638	95528302
chr2	96103356	96121272
chr2	96280072	96285844
chr2	96287013	96303290
chr2	97670803	97713747
chr2	98250381	98257510
chr2	100712833	100720899
chr2	100938649	100943931
chr2	110518009	110526647
chr2	111358925	111368588
chr2	114257515	114268098
chr2	114284717	114310622
chr2	119587766	119619680
chr2	132118286	132123974
chr2	132764250	132770455
chr2	132793133	132800189
chr2	151081389	151091571
chr2	161341992	161356938
chr2	161512506	161518853
chr2	162269854	162290836
chr2	167231563	167240023
chr2	167385053	167393643
chr2	168141625	168149071
chr2	171564076	171580401
chr2	171627683	171631197
chr2	172514898	172520825
chr2	172910827	172916677
chr2	172943288	172975607
chr2	175870248	175874398
chr2	176065556	176071130
chr2	176107570	176115627
chr2	176121979	176145514
chr2	176147526	176157212
chr2	176172898	176181013
chr2	176212015	176246672
chr2	176886706	176908570
chr2	176915375	176920595
chr2	176924745	177005773
chr2	177495228	177518109
chr2	178004228	178018230
chr2	182541898	182545729
chr2	199175037	199187630
chr2	199196436	199206674
chr2	200308357	200314218
chr2	200315294	200320690
chr2	200324244	200342745
chr2	200443274	200457976
chr2	200651834	200659342
chr2	200673248	200685988
chr2	200691350	200697439
chr2	200706001	200723195
chr2	200726830	200731089
chr2	202670231	202675722
chr2	202746585	202754621
chr2	202893738	202911876
chr2	207115650	207147495
chr2	216293719	216305862
chr2	232687499	232714469
chr2	233247076	233261201
chr2	238717152	238743048
chr2	239751838	239765629
chr2	241606817	241614576
chr20	222172	227391
chr20	232917	246219
chr20	1206632	1230709
chr20	1377804	1383426
chr20	2525858	2534687
chr20	2548376	2557679
chr20	2782151	2790812
chr20	8063342	8071902
chr20	9489746	9498023
chr20	9821239	9830947
chr20	10472331	10480869
chr20	13191544	13201865
chr20	17177954	17187810
chr20	17197526	17207421
chr20	18029502	18047891
chr20	20349439	20357879
chr20	20389682	20398503
chr20	20418487	20445385
chr20	20709995	20723219
chr20	20731230	20747083
chr20	21372327	21389871
chr20	21412599	21424922
chr20	21434871	21441603
chr20	21673950	21699991
chr20	22556112	22565058
chr20	25049459	25067869
chr20	25874596	25882623
chr20	29425950	29428720
chr20	32780681	32790211
chr20	37348644	37360555
chr20	44411911	44417927
chr20	45047103	45053202
chr20	48165291	48176534
chr20	50412571	50423507
chr20	50617591	50623981
chr20	52545432	52552133
chr20	52785479	52794356
chr20	55197841	55216426
chr20	55491156	55506260
chr20	55522898	55539367
chr20	55591587	55598999
chr20	55625812	55637835
chr20	55905233	55921715
chr20	56795775	56807210
chr20	57411199	57420423
chr20	57428412	57436837
chr20	57500689	57529736
chr20	57620537	57633313
chr20	57634906	57654963
chr20	57657743	57663592
chr20	58084425	58090369
chr20	58095114	58106693
chr20	61043573	61055800
chr20	61619486	61640808
chr20	61670396	61678184
chr20	61767162	61772256
chr20	62928604	62937188
chr21	9429456	9437613
chr21	9443176	9464595
chr21	25490625	25500776
chr21	25586967	25598829
chr21	26710531	26719526
chr21	29165506	29175640
chr21	31308609	31316595
chr21	36035674	36051072
chr21	38054739	38094435
chr21	38373462	38383322
chr21	40022423	40038235
chr21	40801835	40812486
chr21	42875418	42883118
chr21	43186939	43196422
chr21	45651901	45667644
chr21	46122866	46134180
chr21	46340086	46353979
chr21	46810758	46820745
chr22	16193695	16200478
chr22	19738981	19748032
chr22	22486051	22507287
chr22	23689724	23698015
chr22	25059410	25091086
chr22	25674591	25682431
chr22	25810260	25823412
chr22	26729139	26734672
chr22	26773107	26782825
chr22	26803704	26823680
chr22	30467166	30474062
chr22	38788238	38793968
chr22	38913458	38923622
chr22	38926205	38937746
chr22	39504363	39514854
chr22	39549347	39555975
chr22	40225785	40234264
chr22	40457415	40469726
chr22	43500999	43512432
chr22	46410943	46415648
chr22	49706186	49716969
chr22	50235233	50246130
chr22	50968781	50979801
chr22	51081654	51083415
chr3	459523	473906
chr3	496199	506429
chr3	11756756	11765703
chr3	12329408	12336579
chr3	23842953	23847187
chr3	25466587	25474637
chr3	27752929	27774202
chr3	41230227	41240322
chr3	42302217	42309195
chr3	43317431	43327615
chr3	45833976	45841470
chr3	62350634	62368926
chr3	70114922	70127196
chr3	71826704	71837406
chr3	86873855	86886414
chr3	86923459	86935346
chr3	86936934	86955823
chr3	86986663	87005798
chr3	87025187	87049018
chr3	89152864	89169357
chr3	89204029	89218112
chr3	89448441	89462186
chr3	89464454	89477816
chr3	89487430	89494583
chr3	89621380	89633137
chr3	111688749	111695848
chr3	114085171	114098754
chr3	114163660	114176647
chr3	114803228	114810195
chr3	118742166	118756449
chr3	123743177	123751587
chr3	128196965	128216705
chr3	134125973	134138233
chr3	137479657	137493363
chr3	138655208	138671620
chr3	147044496	147149014
chr3	149990084	149997700
chr3	150016600	150026888
chr3	150049787	150073858
chr3	150110574	150124943
chr3	156278627	156290644
chr3	156292267	156307005
chr3	156319507	156329034
chr3	157806153	157827395
chr3	159934778	159943481
chr3	168855389	168873217
chr3	168956158	168964346
chr3	169069956	169078075
chr3	169381058	169388941
chr3	180358117	180381420
chr3	180424612	180431070
chr3	180434823	180444786
chr3	180449285	180467239
chr3	180514426	180519699
chr3	180523392	180536823
chr3	180547681	180555474
chr3	180584261	180598540
chr3	180767603	180779328
chr3	182402180	182418475
chr3	182451205	182456097
chr3	182499743	182517374
chr3	182531627	182538983
chr3	184188961	184195524
chr3	184206321	184213200
chr3	184228130	184257688
chr3	185078682	185083625
chr3	197784294	197794632
chr3	197798268	197826297
chr3	197836273	197846348
chr3	197850774	197860353
chr3	197894847	197899543
chr4	1046063	1051933
chr4	1394637	1401819
chr4	1418056	1423148
chr4	4225521	4232313
chr4	4851977	4878170
chr4	8889863	8897244
chr4	13493549	13507849
chr4	13513614	13551148
chr4	18027395	18034304
chr4	20254276	20261563
chr4	33348689	33358345
chr4	41218718	41228827
chr4	41534841	41547808
chr4	41593567	41610231
chr4	41741646	41759176
chr4	41857584	41888108
chr4	46392238	46398869
chr4	66529450	66534509
chr4	77166055	77173114
chr4	77602840	77614700
chr4	77817787	77821797
chr4	81112721	81120178
chr4	84013644	84019946
chr4	85407514	85408285
chr4	85410221	85425471
chr4	90621571	90628127
chr4	94741195	94759895
chr4	97093508	97111643
chr4	106551555	106559538
chr4	106812630	106823845
chr4	108999181	109005832
chr4	109056435	109099559
chr4	111529220	111565103
chr4	113066953	113075478
chr4	113257501	113270804
chr4	113297121	113320583
chr4	113324436	113329776
chr4	113339993	113350454
chr4	113421973	113448650
chr4	113627283	113632068
chr4	121987221	121998091
chr4	128541149	128552470
chr4	141482800	141493181
chr4	147839559	147846816
chr4	149359520	149373771
chr4	152397522	152406416
chr4	154064925	154073646
chr4	154132459	154142657
chr4	164261249	164269390
chr4	174430688	174475553
chr4	174930359	174960375
chr4	175018362	175096239
chr4	175111459	175145883
chr4	175435081	175448767
chr4	182196749	182202536
chr4	182204323	182218062
chr4	184718579	184724100
chr4	185933186	185945419
chr4	186368518	186392228
chr4	186427242	186440666
chr4	186447424	186465293
chr4	189961283	189978697
chr4	190082761	190089867
chr4	190930273	190943223
chr5	16936397	16942250
chr5	22209711	22214710
chr5	22849549	22858952
chr5	29145121	29160883
chr5	29193234	29202867
chr5	32710644	32716778
chr5	36250082	36263527
chr5	38523247	38530000
chr5	38531893	38539377
chr5	38551665	38556316
chr5	42938403	42966174
chr5	42982350	43007101
chr5	50258675	50267947
chr5	50676736	50685469
chr5	52076498	52090826
chr5	52370574	52381854
chr5	54468815	54476303
chr5	54512500	54529067
chr5	55054735	55061765
chr5	55070805	55086110
chr5	55106551	55121770
chr5	56249130	56260706
chr5	63458641	63465050
chr5	68783957	68793715
chr5	69008221	69029435
chr5	69033064	69047047
chr5	69048843	69064492
chr5	69065594	69074903
chr5	69085120	69098204
chr5	69118194	69139396
chr5	69292448	69319604
chr5	69587681	69607280
chr5	69616495	69644435
chr5	69646176	69654938
chr5	69664807	69675913
chr5	69677925	69694897
chr5	69883584	69902661
chr5	69923133	69936861
chr5	69947329	69956314
chr5	69957574	69972384
chr5	69994696	70014153
chr5	70167542	70193194
chr5	70587291	70607048
chr5	70626749	70643453
chr5	70644870	70653862
chr5	70656382	70678077
chr5	70687022	70715943
chr5	70723375	70733353
chr5	70736159	70748393
chr5	72512098	72536620
chr5	72582525	72614404
chr5	72672460	72677922
chr5	72708207	72742153
chr5	72744372	72750756
chr5	76815653	76827979
chr5	76918439	76946684
chr5	79852206	79856042
chr5	80250489	80262949
chr5	89838604	89862344
chr5	92940020	92954627
chr5	94612717	94619436
chr5	104226343	104235920
chr5	106998066	107006267
chr5	107426290	107436266
chr5	110404847	110411023
chr5	111028291	111035118
chr5	111107442	111117115
chr5	114505906	114520474
chr5	114633837	114645672
chr5	122372571	122381140
chr5	122415379	122446129
chr5	122834993	122842394
chr5	133855686	133861039
chr5	134361014	134379247
chr5	135266386	135277523
chr5	137574468	137580847
chr5	139433591	139441069
chr5	139482889	139492818
chr5	139495700	139509421
chr5	145716340	145729333
chr5	145788117	145794644
chr5	153848242	153871218
chr5	158510534	158526196
chr5	169674401	169682867
chr5	170731401	170768918
chr5	172651224	172686931
chr5	172750911	172756678
chr5	174145246	174164553
chr5	180072631	180080971
chr5	180111768	180120112
chr5	180482580	180490134
chr5	180528382	180533459
chr5	180538630	180546910
chr6	129585	138853
chr6	387507	397260
chr6	791810	797975
chr6	861661	865123
chr6	1313645	1317077
chr6	1373776	1397629
chr6	1597466	1629893
chr6	1794154	1807187
chr6	1810696	1826297
chr6	1829788	1843229
chr6	1847831	1853558
chr6	1855820	1866330
chr6	1867503	1888257
chr6	2022799	2040348
chr6	2921549	2928549
chr6	4105512	4113534
chr6	5995103	6011124
chr6	7535940	7580451
chr6	10380316	10429243
chr6	11020244	11028805
chr6	11037106	11044686
chr6	13919124	13929914
chr6	16120850	16127813
chr6	16186968	16196571
chr6	17275232	17291441
chr6	18273935	18282755
chr6	19385848	19392087
chr6	19807930	19811359
chr6	23172698	23180453
chr6	23181593	23201888
chr6	26318694	26337972
chr6	26686197	26739013
chr6	26745004	26760964
chr6	26763058	26791363
chr6	26926696	26941882
chr6	27055787	27066951
chr6	27191996	27212404
chr6	27238784	27273177
chr6	27501509	27535462
chr6	27556121	27567980
chr6	27632529	27643793
chr6	27744450	27751436
chr6	28171535	28184745
chr6	28443751	28451020
chr6	28723676	28796198
chr6	30066831	30069665
chr6	30415918	30421841
chr6	30431997	30439233
chr6	31197930	31204368
chr6	31364635	31373171
chr6	31459319	31471495
chr6	32842850	32852831
chr6	32853865	32859991
chr6	32880754	32891974
chr6	41202408	41208445
chr6	41288326	41299833
chr6	44285655	44291647
chr6	45375648	45418415
chr6	45420341	45428163
chr6	50784430	50821388
chr6	52493561	52503255
chr6	53215036	53221347
chr6	58139523	58149343
chr6	58168046	58174124
chr6	58177568	58182913
chr6	71096315	71115559
chr6	72131121	72146889
chr6	83068774	83074323
chr6	85467565	85487810
chr6	91007190	91016689
chr6	97364656	97371406
chr6	99953277	99966695
chr6	100030793	100069847
chr6	100888116	100920815
chr6	106440282	106446625
chr6	106532830	106552022
chr6	106947308	106965564
chr6	106971948	106990774
chr6	108431576	108466330
chr6	108470572	108503258
chr6	109330837	109338504
chr6	117196593	117204066
chr6	119663602	119683116
chr6	123314413	123323691
chr6	123326020	123334873
chr6	123339156	123347415
chr6	125418187	125426210
chr6	125680791	125692112
chr6	125693435	125706655
chr6	126054128	126086131
chr6	132122192	132129132
chr6	132718342	132727975
chr6	133556324	133583264
chr6	134172647	134179507
chr6	134203919	134221010
chr6	135496930	135501481
chr6	136866777	136871244
chr6	137307311	137314869
chr6	137360739	137371078
chr6	137805895	137824616
chr6	143994626	144002802
chr6	144064738	144077076
chr6	150256492	150262661
chr6	150268781	150283146
chr6	150301758	150316523
chr6	150329510	150338488
chr6	152124018	152137181
chr6	166576798	166586787
chr6	166650724	166672487
chr6	168838470	168846234
chr6	170919844	170925326
chr7	23498	24824
chr7	323323	334887
chr7	350666	356432
chr7	1236009	1304364
chr7	8302109	8305393
chr7	12243205	12250371
chr7	12596232	12625035
chr7	15711661	15740495
chr7	19129042	19166511
chr7	19177703	19187339
chr7	20810695	20841687
chr7	21286904	21296034
chr7	21578595	21588103
chr7	21985802	21995509
chr7	24324703	24328974
chr7	24595395	24612739
chr7	25693870	25703635
chr7	25883328	25914933
chr7	25917460	25926509
chr7	25927578	25932259
chr7	26707000	26741095
chr7	26746841	26781253
chr7	26884240	26906974
chr7	27124530	27161244
chr7	27170507	27270875
chr7	27275518	27295603
chr7	28300284	28306974
chr7	29600589	29611092
chr7	29772288	29779482
chr7	29846793	29864013
chr7	33944760	33951178
chr7	35264721	35304775
chr7	36423285	36429222
chr7	39003442	39038365
chr7	39853354	39861956
chr7	39863087	39872795
chr7	41736833	41744221
chr7	42271012	42276571
chr7	57745381	57748081
chr7	64579362	64586184
chr7	64972082	64978117
chr7	65035347	65043782
chr7	69400350	69410707
chr7	87224798	87235182
chr7	88382981	88396468
chr7	89946241	89955700
chr7	92465794	92488412
chr7	93200090	93207549
chr7	93515403	93522887
chr7	93853681	93860241
chr7	93882396	93893200
chr7	95321659	95332970
chr7	95384545	95392399
chr7	96615871	96657403
chr7	97356697	97367097
chr7	103622902	103634628
chr7	105650347	105670508
chr7	107293892	107306702
chr7	113721340	113733740
chr7	116957608	116964428
chr7	119711489	119721873
chr7	119723499	119733869
chr7	120626648	120635634
chr7	120963481	120979997
chr7	121934983	121961747
chr7	129416896	129427890
chr7	130419308	130438241
chr7	150854206	150863553
chr7	155163150	155178864
chr7	155239614	155264356
chr7	155289174	155308049
chr7	155599997	155607058
chr7	156792748	156823153
chr8	682336	694278
chr8	9756624	9777966
chr8	10584231	10595516
chr8	11060738	11070901
chr8	11115679	11121772
chr8	11205306	11216097
chr8	11530669	11583986
chr8	13263500	13269912
chr8	13418988	13426726
chr8	16857171	16865680
chr8	17562727	17587856
chr8	17645691	17664282
chr8	17682904	17691922
chr8	17721966	17727451
chr8	17761461	17771310
chr8	20046863	20053691
chr8	23556174	23574071
chr8	24808237	24822865
chr8	25893745	25910524
chr8	30241957	30246379
chr8	38599204	38613072
chr8	38614816	38621728
chr8	55359489	55385230
chr8	64867370	64877081
chr8	64879853	64901844
chr8	65168469	65177728
chr8	65180186	65197685
chr8	65260554	65266435
chr8	65274363	65281860
chr8	65487505	65501999
chr8	67867260	67885442
chr8	67898424	67905751
chr8	70977434	70988028
chr8	72459882	72477189
chr8	72749240	72761286
chr8	75228855	75233937
chr8	76314807	76324047
chr8	77571112	77643224
chr8	78034756	78059112
chr8	85095343	85099732
chr8	95651797	95660168
chr8	96146520	96151768
chr8	99075785	99082612
chr8	99947630	99977155
chr8	109087928	109098876
chr8	117888533	117897575
chr8	121881374	121887505
chr8	124287705	124292817
chr8	144501173	144512248
chr8	144841384	144848677
chr9	62252	83357
chr9	105433	118365
chr9	211179	219254
chr9	838541	853751
chr9	904173	920730
chr9	948761	993893
chr9	1025708	1051889
chr9	3973144	3979754
chr9	13438286	13451186
chr9	13551670	13563596
chr9	16411909	16419242
chr9	16863949	16873780
chr9	21552410	21563464
chr9	21669180	21687123
chr9	21963272	22008782
chr9	23826868	23838334
chr9	23846780	23855231
chr9	29209145	29218985
chr9	33632783	33641928
chr9	33749310	33758638
chr9	35892671	35896965
chr9	36982140	36989898
chr9	37013551	37044120
chr9	38612704	38624756
chr9	42718980	42726547
chr9	42734055	42745747
chr9	45350216	45356859
chr9	66483579	66494292
chr9	66520382	66525981
chr9	68806258	68815800
chr9	69142590	69158730
chr9	69190792	69201884
chr9	69784513	69794082
chr9	70149677	70162579
chr9	70167444	70177952
chr9	70403071	70413489
chr9	70422901	70428042
chr9	70916597	70930240
chr9	70966280	70975359
chr9	71935889	71946392
chr9	73023945	73033159
chr9	79625842	79641790
chr9	84305067	84311780
chr9	94707231	94712456
chr9	95563137	95583967
chr9	96706430	96724988
chr9	99984367	99990203
chr9	100607273	100625986
chr9	100686595	100696546
chr9	104259148	104265865
chr9	112260600	112266607
chr9	112504116	112523787
chr9	116572606	116587037
chr9	116865417	116870448
chr9	120498313	120508414
chr9	124100358	124117413
chr9	124123805	124129241
chr9	124972374	124997672
chr9	126754466	126772855
chr9	126924571	126943074
chr9	129017852	129031829
chr9	129276700	129286856
chr9	129368523	129396956
chr9	129475487	129480226
chr9	129485861	129490506
chr9	133530274	133544598
chr9	135038138	135042249
chr9	135287299	135295486
chr9	135452843	135466022
chr9	139082015	139097105
chr9	139672221	139678140
chr9	141121481	141126975
chrX	591448	601949
chrX	13830309	13839698
chrX	13949671	13961252
chrX	16894839	16900224
chrX	25023842	25046548
chrX	46764580	46771589
chrX	91034312	91040156
chrX	105061791	105066977
chrX	119121299	119140679
chrX	119144364	119154388
chrX	135327819	135334900
chrX	136649776	136656684

## Sheet: DIPG04 H3K27me3
Chromosome	Start position	End position
chr1	42588	49119
chr1	54912	63523
chr1	65903	72108
chr1	112842	117438
chr1	392629	403172
chr1	586410	599399
chr1	638836	644279
chr1	805565	809058
chr1	813201	834214
chr1	3569535	3572761
chr1	6508794	6513314
chr1	10850107	10854867
chr1	11614432	11619539
chr1	17119637	17123381
chr1	18949661	18973425
chr1	21743537	21754422
chr1	21806517	21812511
chr1	22535777	22542070
chr1	22631597	22636633
chr1	22887424	22889760
chr1	22929809	22932941
chr1	25207127	25211489
chr1	25251688	25255763
chr1	25477009	25482733
chr1	26372841	26375483
chr1	26740502	26742984
chr1	29135934	29138656
chr1	33665882	33671010
chr1	36163649	36167953
chr1	38095040	38105801
chr1	40159842	40162975
chr1	42534054	42543558
chr1	42846267	42848683
chr1	44847587	44855521
chr1	44859246	44871936
chr1	44873382	44890333
chr1	44892236	44896245
chr1	44910059	44913667
chr1	44921566	44925849
chr1	46955005	46958721
chr1	47687496	47700760
chr1	47882279	47887463
chr1	47897536	47902368
chr1	47904195	47916351
chr1	47925200	47928390
chr1	48181489	48185420
chr1	50879022	50898739
chr1	53522439	53527648
chr1	60305651	60317773
chr1	60393889	60397066
chr1	63346031	63353525
chr1	63777838	63802684
chr1	63805996	63822437
chr1	75591505	75613597
chr1	77331109	77334930
chr1	82260881	82266364
chr1	82267721	82286534
chr1	82298012	82305025
chr1	82312916	82317446
chr1	82385565	82409219
chr1	85459663	85468308
chr1	85508208	85517804
chr1	85660721	85666564
chr1	85667615	85673686
chr1	85684913	85690452
chr1	85989448	86005689
chr1	90569627	90578137
chr1	91169164	91204623
chr1	91291874	91316220
chr1	92933515	92958771
chr1	108750059	108757072
chr1	108989538	108991975
chr1	110000566	110019520
chr1	110609231	110617863
chr1	110627205	110630635
chr1	110989930	110996017
chr1	111149984	111153360
chr1	111211947	111220646
chr1	114696642	114701440
chr1	115396437	115401665
chr1	115454082	115463846
chr1	116377782	116381279
chr1	116382287	116392741
chr1	119516396	119543909
chr1	119546589	119552819
chr1	121134068	121141230
chr1	145289063	145292938
chr1	145969710	145973861
chr1	145983567	145987782
chr1	146012951	146017827
chr1	146507887	146513030
chr1	146541923	146555293
chr1	147511529	147515357
chr1	147525416	147531465
chr1	147554705	147558859
chr1	148547866	148552940
chr1	148618123	148621964
chr1	148633051	148634978
chr1	148647275	148651991
chr1	148660036	148684138
chr1	148795126	148800479
chr1	148808458	148810892
chr1	148821895	148835819
chr1	148838385	148848243
chr1	148848980	148907011
chr1	148920360	148927520
chr1	149004539	149009893
chr1	149012433	149021667
chr1	149363761	149370408
chr1	149747043	149754703
chr1	151713630	151721760
chr1	151775875	151779997
chr1	152025035	152033692
chr1	152046141	152051134
chr1	152077433	152088016
chr1	153230913	153239510
chr1	154020547	154025703
chr1	154460792	154483544
chr1	154484304	154492141
chr1	154603471	154610299
chr1	154623985	154633846
chr1	156385264	156415099
chr1	156608347	156614922
chr1	156890680	156893629
chr1	158147315	158168981
chr1	158692536	158694231
chr1	158707159	158710886
chr1	159135100	159140943
chr1	160003437	160007070
chr1	162040695	162043184
chr1	165314274	165326192
chr1	165355286	165361439
chr1	165562410	165565333
chr1	171811776	171817463
chr1	177132163	177142462
chr1	179542604	179547857
chr1	180191336	180198534
chr1	180199299	180213018
chr1	197872044	197909016
chr1	199994818	200016368
chr1	200040012	200043415
chr1	201208774	201216704
chr1	202180818	202186053
chr1	202226544	202230324
chr1	202609482	202616813
chr1	202668487	202678831
chr1	202679641	202682861
chr1	202942300	202945479
chr1	202947415	202951072
chr1	202959230	202968888
chr1	203075143	203084279
chr1	205389454	205395539
chr1	205421465	205429673
chr1	205534409	205542052
chr1	207158115	207172789
chr1	207618608	207632606
chr1	207668699	207678480
chr1	207810021	207815392
chr1	207840389	207845228
chr1	210103814	210139239
chr1	210159993	210213510
chr1	210226114	210229683
chr1	210230814	210236410
chr1	210333019	210346003
chr1	212773616	212781399
chr1	214357729	214365825
chr1	216886137	216900681
chr1	218330839	218349840
chr1	220696047	220705388
chr1	226689698	226694344
chr1	228703069	228706521
chr1	229492809	229496715
chr1	230556870	230561426
chr1	231181524	231183446
chr1	234037541	234041280
chr1	237206152	237210027
chr1	241685052	241690560
chr10	5387971	5410906
chr10	6077629	6089109
chr10	6552202	6562259
chr10	6606497	6621757
chr10	6677300	6682640
chr10	6693247	6697388
chr10	7455205	7463373
chr10	7571670	7575117
chr10	7693929	7703224
chr10	7706305	7708759
chr10	7709686	7713756
chr10	8078469	8093454
chr10	11865998	11869599
chr10	14203228	14224938
chr10	14372165	14380986
chr10	15646302	15650636
chr10	15725372	15735474
chr10	15758649	15761676
chr10	15906497	15913968
chr10	16567002	16570399
chr10	17354529	17358978
chr10	22625039	22629355
chr10	22630097	22646387
chr10	22654998	22687873
chr10	26504095	26512798
chr10	28035296	28040341
chr10	28592411	28597798
chr10	35932818	35934926
chr10	35938645	35954606
chr10	35960899	35967012
chr10	35972729	35994946
chr10	35998378	36003774
chr10	36006600	36022488
chr10	36039839	36045959
chr10	36209820	36219050
chr10	36233822	36243012
chr10	42646245	42649701
chr10	42669076	42677405
chr10	45864536	45869513
chr10	46606997	46612536
chr10	47113706	47120016
chr10	47147345	47150324
chr10	47998212	48001575
chr10	48046777	48052501
chr10	50606594	50611829
chr10	51991651	51996210
chr10	52476591	52497829
chr10	60933928	60936203
chr10	60948372	60953789
chr10	69987148	69994323
chr10	71328765	71334938
chr10	71745256	71751970
chr10	71809155	71818132
chr10	72040676	72043488
chr10	72856318	72862130
chr10	75032171	75035623
chr10	75055236	75060263
chr10	75089192	75094520
chr10	75110070	75117846
chr10	78554860	78558905
chr10	81306339	81311664
chr10	81322628	81326207
chr10	81336225	81340789
chr10	81641400	81677796
chr10	93494983	93499541
chr10	94441985	94464175
chr10	94831708	94838127
chr10	95360924	95365057
chr10	97855800	97860105
chr10	97862941	97863633
chr10	97866159	97883202
chr10	98158686	98165463
chr10	98183688	98187650
chr10	99729566	99738899
chr10	100988674	100998595
chr10	101208057	101213809
chr10	101278420	101305146
chr10	102220304	102230352
chr10	102238049	102245951
chr10	102413836	102415757
chr10	102486916	102515051
chr10	102589145	102593275
chr10	102885628	102900214
chr10	102903595	102914611
chr10	102968555	102972463
chr10	102974728	103000898
chr10	103006048	103010426
chr10	103466229	103470529
chr10	105037557	105041521
chr10	105045993	105050288
chr10	105254146	105258762
chr10	115799807	115803194
chr10	115804852	115813186
chr10	115971810	115986617
chr10	115992451	115996010
chr10	115997203	116004684
chr10	116854036	116857376
chr10	118890636	118899051
chr10	118916977	118933368
chr10	119289213	119312898
chr10	124470977	124482690
chr10	124890004	124912662
chr10	126136539	126140453
chr10	127151384	127162925
chr10	127176299	127182098
chr10	135144540	135148758
chr10	135289841	135295593
chr10	135436285	135442491
chr10	135454375	135457327
chr10	135475826	135478106
chr11	61532	64538
chr11	1692707	1698427
chr11	2161145	2165669
chr11	3448820	3451514
chr11	3468737	3476370
chr11	3493325	3497436
chr11	3669389	3676124
chr11	4229302	4235944
chr11	4515743	4520104
chr11	6672837	6676184
chr11	8188232	8192456
chr11	8290135	8294234
chr11	11118094	11127191
chr11	11145497	11153472
chr11	11798475	11801829
chr11	13026806	13039352
chr11	13040396	13048105
chr11	16629161	16636223
chr11	17690439	17693309
chr11	17741097	17745757
chr11	18063713	18070101
chr11	19360514	19374963
chr11	20175370	20187838
chr11	20358024	20362717
chr11	20618046	20623044
chr11	31821580	31863710
chr11	32428337	32472306
chr11	33886280	33890735
chr11	35434825	35445692
chr11	35458254	35464124
chr11	36335636	36339692
chr11	43593344	43596750
chr11	43603245	43606103
chr11	43609542	43617713
chr11	43643748	43665705
chr11	44323513	44363440
chr11	45331190	45337819
chr11	45726941	45731522
chr11	59198779	59205370
chr11	59481889	59486906
chr11	60976383	60986548
chr11	60996316	61000728
chr11	61002510	61005570
chr11	61939771	61942654
chr11	61943949	61946595
chr11	63254445	63261077
chr11	64258233	64262414
chr11	65515276	65522009
chr11	66170364	66174142
chr11	66496221	66500361
chr11	67442708	67446480
chr11	69584123	69589367
chr11	69631205	69634182
chr11	70669583	70675063
chr11	82440532	82443640
chr11	82444494	82444733
chr11	85351717	85355463
chr11	100987377	101004564
chr11	107462080	107469425
chr11	113195359	113199972
chr11	113977446	113989434
chr11	117663794	117665835
chr11	117667990	117671695
chr11	118026043	118030182
chr11	118080752	118085997
chr11	118130396	118141663
chr11	118218518	118221282
chr11	118595310	118599849
chr11	119825378	119834439
chr11	120013776	120022453
chr11	121126880	121129794
chr11	121136836	121143089
chr11	121152666	121156432
chr11	121849280	121858517
chr11	122804874	122805041
chr11	122806938	122818071
chr11	122820978	122840002
chr11	122841387	122860147
chr11	122861611	122867327
chr11	123226773	123235944
chr11	123242279	123254689
chr11	123290856	123297184
chr11	123556285	123561774
chr11	124709414	124726294
chr11	124727828	124731320
chr11	125777421	125784776
chr11	125879187	125885160
chr11	125907255	125910346
chr11	125919037	125932351
chr11	128541308	128562183
chr11	128564547	128569656
chr11	129219669	129223895
chr11	129229475	129268158
chr11	129674047	129677828
chr11	130298531	130301093
chr11	134142542	134146654
chr12	164760	168985
chr12	187539	192596
chr12	375860	380120
chr12	2838781	2847284
chr12	2893166	2896852
chr12	3479143	3482585
chr12	3601140	3605372
chr12	3653810	3658907
chr12	3681042	3684848
chr12	4371796	4386523
chr12	5535221	5540691
chr12	5541724	5545032
chr12	5555962	5559184
chr12	6109879	6118209
chr12	7445720	7452623
chr12	8665424	8669834
chr12	8671943	8677391
chr12	8683679	8688982
chr12	9709862	9714550
chr12	10910836	10930881
chr12	17669370	17681451
chr12	17705881	17708783
chr12	17718841	17735230
chr12	21680750	21684378
chr12	31281418	31291352
chr12	31305279	31309797
chr12	31479255	31484844
chr12	33588003	33595861
chr12	45437706	45444241
chr12	47222243	47225457
chr12	47873608	47876947
chr12	48314073	48318950
chr12	48388961	48403864
chr12	48405486	48416626
chr12	48569355	48578274
chr12	49372409	49379109
chr12	52484180	52487024
chr12	54099577	54104043
chr12	54141186	54150705
chr12	54304531	54312422
chr12	54317694	54452685
chr12	54565826	54569911
chr12	54845058	54861545
chr12	56882070	56885875
chr12	57865835	57869759
chr12	58156417	58161335
chr12	62517625	62522649
chr12	62566308	62590867
chr12	62605433	62613876
chr12	62633872	62644427
chr12	63535247	63544633
chr12	65170657	65186435
chr12	65216298	65225595
chr12	65254281	65265881
chr12	65472779	65480710
chr12	65506936	65547804
chr12	67194238	67200862
chr12	67459011	67462345
chr12	69676850	69681818
chr12	69719553	69728601
chr12	69729963	69735579
chr12	70134565	70137715
chr12	70754852	70759502
chr12	70760443	70764053
chr12	71831385	71853301
chr12	72199083	72204031
chr12	72382344	72385627
chr12	72654113	72678561
chr12	85640284	85648037
chr12	85656843	85704331
chr12	85726368	85729444
chr12	93937428	93943185
chr12	93959042	93963662
chr12	93966784	93991216
chr12	94517773	94522978
chr12	94538804	94542451
chr12	94543246	94549448
chr12	94630161	94636416
chr12	95264176	95270794
chr12	96342954	96346948
chr12	99284292	99288358
chr12	106975659	106989915
chr12	107706437	107711888
chr12	108166384	108171664
chr12	108246116	108258783
chr12	109743779	109756675
chr12	109766515	109768741
chr12	109793706	109796775
chr12	109801408	109801900
chr12	109803252	109809205
chr12	111467221	111470516
chr12	111472682	111476643
chr12	112256728	112262666
chr12	113901326	113916373
chr12	114833241	114843967
chr12	114844877	114852559
chr12	115103066	115137385
chr12	117314794	117319218
chr12	120419283	120424348
chr12	120428079	120433492
chr12	120434935	120439149
chr12	132956366	132966192
chr13	22245529	22248390
chr13	22249765	22253710
chr13	22288892	22292042
chr13	22657965	22661365
chr13	22704477	22716071
chr13	23479147	23484162
chr13	23485950	23495775
chr13	24898399	24906823
chr13	25103913	25110216
chr13	25114637	25119990
chr13	25360500	25375524
chr13	25615068	25623084
chr13	25739816	25746630
chr13	25942106	25944926
chr13	28362625	28371123
chr13	28481915	28487141
chr13	28489253	28504742
chr13	28525307	28557465
chr13	29063155	29072640
chr13	29082669	29091074
chr13	29843005	29847821
chr13	37244985	37253449
chr13	46191119	46196724
chr13	46271656	46275137
chr13	46421816	46434113
chr13	49794819	49798568
chr13	51754281	51762315
chr13	51781014	51789645
chr13	52567521	52571608
chr13	52581730	52585682
chr13	72429958	72439552
chr13	72440701	72447784
chr13	78268008	78271649
chr13	96738468	96742519
chr13	96743880	96747254
chr13	100308236	100325119
chr13	100329041	100333776
chr13	100335518	100347899
chr13	100353510	100360597
chr13	100384588	100399376
chr13	100479993	100485277
chr13	100494254	100501015
chr13	100503602	100536844
chr13	100541030	100551627
chr13	100553091	100558415
chr13	100563835	100567005
chr13	100600184	100621717
chr13	100623523	100633042
chr13	100634184	100649410
chr13	102564422	102575179
chr13	103389995	103402846
chr13	111747863	111750237
chr13	111763493	111767112
chr13	112722927	112726495
chr13	112727553	112731156
chr13	113603378	113607168
chr13	113623541	113626463
chr13	113785208	113789338
chr14	19560635	19566512
chr14	19721168	19740244
chr14	19836172	19854594
chr14	20007401	20012747
chr14	21406866	21413283
chr14	21415490	21423025
chr14	22000805	22008321
chr14	23062149	23064657
chr14	23707579	23708007
chr14	23711272	23716031
chr14	23721056	23740558
chr14	29223640	29236539
chr14	29237507	29254805
chr14	31331234	31337059
chr14	31338444	31347578
chr14	33399070	33407263
chr14	35972095	35977340
chr14	35988372	35991651
chr14	35995169	36003432
chr14	36739804	36747741
chr14	36959780	37002251
chr14	37054995	37059035
chr14	37061155	37066116
chr14	37113744	37152514
chr14	37263880	37270284
chr14	38031611	38045181
chr14	38046453	38075244
chr14	38170708	38176382
chr14	39931241	39934582
chr14	51024591	51031242
chr14	54154736	54159615
chr14	54408494	54433296
chr14	57259195	57288896
chr14	58612598	58618213
chr14	60333403	60336189
chr14	60920988	60939187
chr14	60942018	60944730
chr14	60947686	60957220
chr14	60964662	60985301
chr14	61094925	61121471
chr14	62582186	62588347
chr14	65309621	65314494
chr14	65329270	65336457
chr14	65340957	65356542
chr14	65363552	65366020
chr14	70031868	70035871
chr14	71103735	71111662
chr14	74703366	74713637
chr14	74907785	74911107
chr14	74912353	74918569
chr14	76603534	76607606
chr14	76841409	76852781
chr14	89255390	89258707
chr14	90528261	90531870
chr14	94641372	94646983
chr14	94649767	94653483
chr14	95226795	95243089
chr14	97201656	97207536
chr14	97759075	97762828
chr14	102030101	102033063
chr14	102074491	102082271
chr14	102115331	102128683
chr14	104310885	104313373
chr14	104404793	104409592
chr14	105569667	105572374
chr15	20100694	20104080
chr15	20145216	20148613
chr15	20777988	20786869
chr15	20788226	20790694
chr15	21893025	21903949
chr15	22702149	22705317
chr15	23265179	23268940
chr15	23445362	23449120
chr15	23455620	23458036
chr15	29858930	29862236
chr15	29863364	29869002
chr15	30258543	30265679
chr15	30304990	30308194
chr15	30385334	30389028
chr15	30437410	30441275
chr15	30481546	30487733
chr15	30906444	30909618
chr15	31830215	31839769
chr15	32055522	32060101
chr15	32315581	32322136
chr15	32323556	32327858
chr15	32635332	32638212
chr15	32681252	32684907
chr15	34734347	34737983
chr15	34748789	34754487
chr15	34770864	34775041
chr15	34784185	34786776
chr15	34789473	34794712
chr15	34801721	34809053
chr15	34890269	34911170
chr15	35040188	35044173
chr15	35045254	35055202
chr15	35081921	35086390
chr15	38738812	38743931
chr15	43600742	43604722
chr15	45403983	45407644
chr15	45662872	45674868
chr15	45676929	45688900
chr15	49361200	49365761
chr15	50468858	50477785
chr15	51973904	51978908
chr15	51981864	51986770
chr15	52035459	52049546
chr15	53041164	53051201
chr15	53060329	53066622
chr15	53067536	53104460
chr15	56025920	56037584
chr15	58337753	58358331
chr15	58379577	58386292
chr15	58388694	58402016
chr15	59990291	59998464
chr15	60020406	60024139
chr15	60056675	60060601
chr15	60086361	60088447
chr15	60226706	60230017
chr15	60272270	60276804
chr15	60278095	60306893
chr15	60426976	60444213
chr15	60450737	60455651
chr15	60483295	60500172
chr15	60513499	60517471
chr15	60538116	60542256
chr15	60558288	60562888
chr15	62352590	62360119
chr15	62452814	62455953
chr15	62570593	62574062
chr15	68113534	68117689
chr15	69131153	69149074
chr15	70832284	70837761
chr15	72690278	72702056
chr15	72951463	72962624
chr15	72969492	72973588
chr15	73658205	73660749
chr15	74359183	74364108
chr15	75538810	75546630
chr15	75554808	75566524
chr15	75580028	75590896
chr15	75595021	75602874
chr15	76287607	76292353
chr15	76326289	76330031
chr15	76333107	76336516
chr15	76348627	76359163
chr15	76386587	76391161
chr15	76615154	76623141
chr15	76629016	76638279
chr15	78204231	78207527
chr15	78632186	78640415
chr15	78911731	78916267
chr15	78998519	79001877
chr15	79588509	79601952
chr15	80539929	80552598
chr15	81428150	81433247
chr15	89145081	89152562
chr15	89897811	89920507
chr15	89922938	89927426
chr15	91639324	91647048
chr15	96951496	96969410
chr15	99080355	99089444
chr15	99109702	99119807
chr15	99123180	99138143
chr15	99161876	99174447
chr15	99183264	99190393
chr15	99578433	99586336
chr15	100319451	100328754
chr15	100458529	100466786
chr15	100801866	100806699
chr15	101884766	101887894
chr15	102084498	102089202
chr15	102325068	102333817
chr15	102441243	102448493
chr15	102465313	102478845
chr15	102479587	102490544
chr16	1033000	1037687
chr16	1938862	1943304
chr16	3082328	3089970
chr16	3126265	3130613
chr16	15947869	15950912
chr16	21236232	21241895
chr16	21289639	21295045
chr16	23194501	23197197
chr16	32097118	32099734
chr16	32120475	32127099
chr16	32490132	32492914
chr16	32823606	32827062
chr16	32842943	32846064
chr16	33040594	33044543
chr16	33066328	33070523
chr16	55395595	55402860
chr16	66787290	66792522
chr16	73576046	73589228
chr16	73600871	73612939
chr16	73641722	73651184
chr16	73907822	73928917
chr16	82207907	82213916
chr16	82458646	82470082
chr16	82580395	82585028
chr16	84949810	84953892
chr16	85932366	85936319
chr16	86227445	86235542
chr16	86272860	86276040
chr16	86321002	86328283
chr16	86532305	86539270
chr16	86544023	86549340
chr16	90183190	90184759
chr16	90255628	90260951
chr17	12566134	12569017
chr17	13044870	13046634
chr17	13048480	13051642
chr17	13093504	13103115
chr17	13106866	13111491
chr17	13124423	13142952
chr17	13144220	13151051
chr17	13169292	13174056
chr17	14877356	14887331
chr17	14929334	14934666
chr17	14949707	14955751
chr17	14966324	14974718
chr17	14980781	15005922
chr17	16570504	16573214
chr17	16608206	16615801
chr17	18359300	18368025
chr17	18499723	18500545
chr17	18501845	18514436
chr17	18730220	18735140
chr17	18738219	18750684
chr17	20239968	20244963
chr17	20384499	20391655
chr17	20648037	20651878
chr17	20736252	20744151
chr17	20749954	20763451
chr17	20773568	20784301
chr17	21226912	21230893
chr17	25286038	25289634
chr17	27359753	27364586
chr17	28343039	28346553
chr17	28371626	28376406
chr17	28379534	28388679
chr17	28404598	28409252
chr17	28559516	28562457
chr17	30590528	30597311
chr17	33655240	33667735
chr17	33769675	33778778
chr17	33782119	33791876
chr17	33801813	33807650
chr17	33809819	33855929
chr17	33871686	33885704
chr17	34998448	35001730
chr17	35081906	35085681
chr17	35284551	35305544
chr17	36004000	36012486
chr17	36099463	36110288
chr17	36298105	36306994
chr17	37752770	37762859
chr17	37929534	37939604
chr17	37955965	37967368
chr17	37997300	38004858
chr17	38010483	38024541
chr17	38026686	38039309
chr17	38043799	38044144
chr17	38048276	38056880
chr17	38809615	38840798
chr17	38847398	38863330
chr17	38927281	38938444
chr17	38954736	38958562
chr17	38962174	38969640
chr17	39044106	39049058
chr17	39388861	39393840
chr17	39406974	39411647
chr17	39890165	39893168
chr17	43765702	43769384
chr17	44345223	44352602
chr17	45808395	45811836
chr17	45866940	45873387
chr17	45924881	45934382
chr17	46216670	46231833
chr17	46239510	46253391
chr17	46259054	46263969
chr17	46267281	46273736
chr17	46275779	46282465
chr17	46287818	46292160
chr17	46294738	46301322
chr17	46304476	46310898
chr17	46319671	46347106
chr17	46351142	46450339
chr17	46454883	46499378
chr17	46502650	46513588
chr17	46642075	46653950
chr17	46655412	46724351
chr17	46779712	46785062
chr17	46790779	46835902
chr17	47061508	47091291
chr17	48040491	48045918
chr17	48046713	48053567
chr17	53343604	53346839
chr17	56202148	56204373
chr17	56223062	56229495
chr17	56230925	56242766
chr17	56337354	56342235
chr17	56368578	56373389
chr17	56465632	56493633
chr17	56496793	56500916
chr17	56539454	56548149
chr17	59529741	59537359
chr17	59621226	59629004
chr17	59672265	59678655
chr17	60360811	60365038
chr17	60384522	60387465
chr17	61579893	61582074
chr17	64961837	64964543
chr17	66187660	66197081
chr17	72644363	72650554
chr17	74070521	74076143
chr17	77403019	77405708
chr17	77771980	77783008
chr18	901849	906916
chr18	909369	913442
chr18	2183614	2189093
chr18	12097521	12107240
chr18	12114917	12128399
chr18	19739782	19744813
chr18	19752332	19790221
chr18	19924377	19928455
chr18	19932850	19944943
chr18	31799821	31802890
chr18	44737077	44738929
chr18	44769544	44773307
chr18	55090344	55093337
chr18	55095627	55101654
chr18	55103589	55107825
chr18	56773315	56778613
chr18	56887718	56896516
chr18	56910963	56915498
chr18	56931721	56946892
chr18	56949038	56963840
chr18	56979027	56987160
chr18	57027998	57032961
chr18	76773145	76777282
chr18	77419509	77423921
chr19	82306	106122
chr19	108539	113134
chr19	122554	134206
chr19	176190	179170
chr19	1749253	1752465
chr19	1754616	1758745
chr19	5335871	5338485
chr19	30719580	30722304
chr19	35899340	35910069
chr19	40003533	40005996
chr19	40286316	40289759
chr19	42071535	42075319
chr19	42289884	42293675
chr19	42354861	42360595
chr19	42415533	42419251
chr19	42432801	42435270
chr19	42681495	42683534
chr19	46576569	46581330
chr19	46623239	46634247
chr19	46741288	46744306
chr19	46748981	46754092
chr19	47524540	47527240
chr19	49920786	49930725
chr19	49939784	49944378
chr19	51237768	51242103
chr2	10222743	10225992
chr2	10861862	10865536
chr2	20854870	20857351
chr2	20858460	20873637
chr2	27071212	27077140
chr2	27133508	27137429
chr2	27482349	27490390
chr2	30995893	31000260
chr2	31802225	31805920
chr2	39890370	39892684
chr2	39893475	39899950
chr2	45029262	45037667
chr2	45082859	45098792
chr2	45102129	45114485
chr2	45149228	45173158
chr2	47795214	47797970
chr2	60757920	60779855
chr2	60781154	60787900
chr2	60791373	60797484
chr2	63282185	63300111
chr2	66805451	66810889
chr2	70777628	70781053
chr2	71013923	71021232
chr2	71108867	71140666
chr2	71176008	71185146
chr2	71195907	71202717
chr2	71431611	71437443
chr2	71440588	71443909
chr2	71446266	71453686
chr2	73094954	73098497
chr2	73101515	73106479
chr2	73123358	73157340
chr2	73428049	73431105
chr2	73516021	73524571
chr2	73549831	73555248
chr2	86564925	86568183
chr2	86650089	86654270
chr2	87016806	87019703
chr2	87341242	87345317
chr2	87593487	87596872
chr2	88557911	88562709
chr2	88745989	88758455
chr2	90295845	90301757
chr2	90410636	90416759
chr2	90437894	90447801
chr2	90450285	90461743
chr2	91629382	91637944
chr2	91661289	91669643
chr2	91671034	91678816
chr2	91732737	91739178
chr2	91765794	91770776
chr2	91774579	91780769
chr2	91848876	91856537
chr2	91869740	91871711
chr2	91874375	91916721
chr2	91973736	91981011
chr2	91990354	91997209
chr2	91998437	92003400
chr2	92224905	92230334
chr2	92231265	92241598
chr2	92257539	92260953
chr2	95515645	95526036
chr2	95528896	95534333
chr2	95598147	95608163
chr2	95609172	95609346
chr2	96103201	96158310
chr2	96163975	96189281
chr2	96216658	96247449
chr2	96250094	96303981
chr2	96708154	96713816
chr2	97141463	97145441
chr2	97671283	97679422
chr2	97680259	97714251
chr2	98033061	98038061
chr2	99340624	99346895
chr2	100712257	100720929
chr2	100935664	100937767
chr2	100938770	100943977
chr2	101083796	101089931
chr2	103232207	103235605
chr2	106127012	106132384
chr2	110495745	110501386
chr2	110505774	110526965
chr2	110973312	110987387
chr2	111358384	111380505
chr2	111458238	111469769
chr2	111489969	111494064
chr2	111550960	111556111
chr2	111753118	111760464
chr2	113721457	113728917
chr2	113778843	113789830
chr2	113801767	113806505
chr2	114258037	114266869
chr2	114285919	114292385
chr2	114295606	114303555
chr2	119600978	119604158
chr2	119605635	119612276
chr2	119613055	119618280
chr2	121785352	121790073
chr2	132118568	132123073
chr2	132765291	132770566
chr2	132795772	132799549
chr2	137953277	137958180
chr2	152947438	152959008
chr2	154331165	154334570
chr2	162271436	162306079
chr2	162316885	162319137
chr2	163691376	163695227
chr2	170214426	170222268
chr2	171218034	171227612
chr2	171230883	171235440
chr2	171240375	171245427
chr2	171419442	171426074
chr2	171564028	171581624
chr2	171605198	171608387
chr2	171627525	171644933
chr2	171668685	171684830
chr2	173595736	173604225
chr2	175145616	175153136
chr2	175162249	175164524
chr2	175171721	175176500
chr2	175178517	175208626
chr2	175590986	175603931
chr2	175865563	175878756
chr2	176888016	176891459
chr2	176925840	176987651
chr2	177054178	177059649
chr2	180717371	180737307
chr2	182537183	182548505
chr2	191258505	191262595
chr2	200328666	200337960
chr2	200653354	200666136
chr2	200692176	200695831
chr2	200702229	200736420
chr2	202670306	202673566
chr2	202676845	202680613
chr2	207112623	207148193
chr2	207169417	207175868
chr2	207303846	207308104
chr2	207308812	207312838
chr2	209269960	209274113
chr2	211084737	211090475
chr2	218920099	218924482
chr2	219724557	219726985
chr2	219845761	219852450
chr2	219903440	219909206
chr2	219922273	219929850
chr2	223136627	223142253
chr2	223145183	223183760
chr2	223185198	223187907
chr2	230575926	230578778
chr2	231781263	231785712
chr2	231899185	231905878
chr2	232687714	232713801
chr2	233246189	233262005
chr2	233275786	233279275
chr2	233282821	233285649
chr2	237072409	237075966
chr2	237078699	237085612
chr2	237276921	237279511
chr2	238717139	238738189
chr2	240972022	240979412
chr2	240985669	240993292
chr2	241031394	241041525
chr2	241051576	241055269
chr2	241114100	241118532
chr2	241603934	241611427
chr2	241738437	241742542
chr2	241760145	241770238
chr2	242988107	242996118
chr2	243031679	243036341
chr20	124093	128203
chr20	591165	594592
chr20	774395	777295
chr20	1193351	1198215
chr20	1207312	1242459
chr20	1713899	1722341
chr20	1733284	1737171
chr20	1774902	1777955
chr20	1972767	1979132
chr20	2055461	2058227
chr20	2071801	2075024
chr20	2396340	2402329
chr20	2526850	2539023
chr20	2674424	2677683
chr20	2760148	2763421
chr20	2781228	2784039
chr20	2806431	2810593
chr20	4360023	4366104
chr20	9491137	9497671
chr20	13196011	13201448
chr20	18030328	18037444
chr20	18038187	18044875
chr20	20341331	20348150
chr20	21077553	21089732
chr20	21374219	21376488
chr20	21378398	21385550
chr20	21499636	21502456
chr20	21679334	21683257
chr20	21687216	21698716
chr20	22539926	22547338
chr20	25050172	25057018
chr20	25058662	25062205
chr20	25062950	25067099
chr20	25927001	25936066
chr20	26205683	26213448
chr20	30550744	30555508
chr20	30602118	30605898
chr20	30607018	30611861
chr20	30619459	30624602
chr20	30636761	30640378
chr20	31535178	31540143
chr20	32783311	32788893
chr20	33416599	33422426
chr20	33424618	33429944
chr20	33811316	33814217
chr20	34891104	34893975
chr20	37344797	37359929
chr20	39319240	39321636
chr20	43435108	43438889
chr20	43875212	43881029
chr20	44637019	44640609
chr20	44659267	44662973
chr20	44736421	44739996
chr20	44937318	44944375
chr20	45057028	45059985
chr20	46438340	46443583
chr20	47131022	47133238
chr20	55498452	55502456
chr20	55831987	55839536
chr20	55905483	55913638
chr20	57414731	57420557
chr20	61609962	61612622
chr20	61630734	61640195
chr20	61768465	61771947
chr20	61806903	61810281
chr20	61882806	61885563
chr20	62790904	62800075
chr20	62804662	62808326
chr20	62938542	62942647
chr21	9480150	9483420
chr21	9485075	9488552
chr21	10885135	10888517
chr21	11014728	11022206
chr21	15633893	15640004
chr21	26780789	26815571
chr21	27011959	27015471
chr21	30176958	30180622
chr21	30197732	30202481
chr21	34219922	34224239
chr21	34322104	34332258
chr21	34348646	34355031
chr21	34393893	34404648
chr21	34436216	34449958
chr21	34482314	34494097
chr21	34517837	34523011
chr21	34560855	34563583
chr21	38059750	38089902
chr21	43745511	43749261
chr21	44036141	44039882
chr21	46127259	46135953
chr21	46340880	46345549
chr22	16106290	16122409
chr22	16274681	16280729
chr22	16863887	16867437
chr22	17388931	17392949
chr22	17850427	17855935
chr22	18989004	18992986
chr22	21012111	21018400
chr22	21025729	21031482
chr22	22489523	22494634
chr22	22500224	22507215
chr22	25075803	25087230
chr22	25141618	25153148
chr22	25674714	25682088
chr22	25695067	25700926
chr22	25703215	25708201
chr22	25810510	25822155
chr22	27757542	27764425
chr22	34312984	34316193
chr22	37093623	37102304
chr22	37113287	37119453
chr22	37211424	37215088
chr22	39286141	39299533
chr22	39549515	39553246
chr22	43808427	43813991
chr22	45780589	45783803
chr22	45784810	45788775
chr22	50238889	50242404
chr22	51081527	51085010
chr3	1357270	1357909
chr3	1359453	1364983
chr3	4321756	4333913
chr3	11034664	11042294
chr3	11078716	11084594
chr3	12041778	12058100
chr3	15184995	15201222
chr3	15208303	15228409
chr3	25469844	25473634
chr3	27753754	27776178
chr3	28614429	28622062
chr3	32855514	32866667
chr3	37493987	37500293
chr3	42301915	42306669
chr3	42308566	42311351
chr3	45834160	45841239
chr3	45885603	45892484
chr3	48371690	48376312
chr3	48423795	48427886
chr3	50708646	50720026
chr3	53525101	53527914
chr3	53543102	53547043
chr3	57441319	57447127
chr3	62335020	62345661
chr3	62349262	62382211
chr3	62390866	62396664
chr3	62404338	62409920
chr3	62412731	62426218
chr3	62501167	62507532
chr3	62519042	62536219
chr3	67008030	67011862
chr3	67014402	67020776
chr3	68959402	68963690
chr3	70118086	70128818
chr3	71782409	71788725
chr3	71800285	71802723
chr3	71803623	71813747
chr3	71818313	71838358
chr3	71841664	71851899
chr3	71860236	71860990
chr3	71862450	71865350
chr3	71868802	71873000
chr3	78160391	78164331
chr3	95729859	95737576
chr3	96528218	96531793
chr3	96534374	96543962
chr3	111997228	112002139
chr3	112052133	112055119
chr3	113248137	113255113
chr3	118750141	118753650
chr3	122738288	122746216
chr3	123699072	123704073
chr3	123706652	123712367
chr3	123719463	123722584
chr3	123736436	123739255
chr3	123743089	123751557
chr3	123753120	123762958
chr3	123767591	123770565
chr3	123868108	123871576
chr3	124442138	124445551
chr3	125686893	125691413
chr3	125857078	125862575
chr3	125880328	125889741
chr3	126250372	126255182
chr3	126279752	126286632
chr3	126298709	126302641
chr3	127028665	127031913
chr3	127134426	127138841
chr3	127144532	127151305
chr3	127227534	127231371
chr3	127855499	127858600
chr3	133391682	133395161
chr3	137480723	137494143
chr3	137899170	137902812
chr3	138028881	138033943
chr3	138654866	138679941
chr3	147047914	147063243
chr3	147065267	147148794
chr3	155453572	155466586
chr3	156006422	156012754
chr3	157795238	157827810
chr3	164908544	164918553
chr3	172154749	172175078
chr3	180454273	180463278
chr3	183948332	183950624
chr3	184188987	184200622
chr3	184206412	184209460
chr3	184221286	184224232
chr3	184226033	184248070
chr3	184253303	184258508
chr3	184864259	184870664
chr3	184871571	184875492
chr3	186357177	186361079
chr3	186391152	186394937
chr3	186546428	186551724
chr3	194770841	194773964
chr3	195208165	195233411
chr3	195721698	195727760
chr3	197780995	197807642
chr3	197809890	197826334
chr3	197832411	197863508
chr3	197894998	197896305
chr4	1525297	1531392
chr4	4864783	4873502
chr4	13498055	13503571
chr4	13513939	13525198
chr4	13527106	13549366
chr4	16082430	16106286
chr4	41748785	41753237
chr4	77169399	77175388
chr4	94742975	94755627
chr4	106812021	106824830
chr4	107949417	107963812
chr4	109054452	109088495
chr4	109089915	109093624
chr4	111523076	111527712
chr4	111528644	111569492
chr4	111877572	111890563
chr4	112555268	112561040
chr4	113044193	113065881
chr4	113066875	113081442
chr4	113314609	113318705
chr4	113368709	113374119
chr4	113421408	113450002
chr4	113627295	113631461
chr4	123433968	123439895
chr4	141485035	141494326
chr4	141497187	141501776
chr4	147547369	147576387
chr4	147839574	147846320
chr4	149352521	149363481
chr4	149366855	149372087
chr4	153688640	153694430
chr4	155666023	155670417
chr4	174433203	174474753
chr4	175086961	175153336
chr4	184719656	184722596
chr4	184827843	184831618
chr4	185932659	185952055
chr4	187469998	187476620
chr4	189969233	189978430
chr4	190930672	190936534
chr4	190944956	190955993
chr4	190982459	190986691
chr5	28186	34849
chr5	42644	44723
chr5	86601	90050
chr5	99320	102695
chr5	558764	562591
chr5	595510	600045
chr5	967253	972552
chr5	6449485	6452962
chr5	14582390	14586123
chr5	22139215	22142880
chr5	22197435	22201923
chr5	23036858	23045552
chr5	33939523	33941923
chr5	35952247	35956367
chr5	36801634	36809523
chr5	36814610	36819557
chr5	36820869	36824943
chr5	36836281	36847259
chr5	38011558	38015940
chr5	39571389	39575434
chr5	39576713	39592332
chr5	39624417	39644110
chr5	39654089	39664719
chr5	39670666	39681822
chr5	39691138	39710762
chr5	41984719	41989884
chr5	42042177	42046578
chr5	42905322	42908919
chr5	42939605	42945752
chr5	42950230	42967575
chr5	42968426	42978751
chr5	42984239	43005607
chr5	44337714	44343541
chr5	44381623	44396960
chr5	50258662	50272900
chr5	50668454	50699494
chr5	54272371	54282711
chr5	54417179	54422161
chr5	54438031	54442370
chr5	54469163	54498170
chr5	54499978	54507827
chr5	54511977	54539235
chr5	56248605	56260640
chr5	63802802	63806492
chr5	65888182	65891895
chr5	65892827	65902429
chr5	68784789	68788214
chr5	70656748	70676707
chr5	70683520	70690593
chr5	70695827	70719138
chr5	70723406	70749959
chr5	70981866	70987099
chr5	71011560	71021059
chr5	72513897	72529440
chr5	72530639	72547168
chr5	72584635	72602069
chr5	72629061	72637856
chr5	72708415	72742976
chr5	72744374	72752043
chr5	75376636	75379058
chr5	75380385	75380441
chr5	76819201	76832046
chr5	76854243	76862587
chr5	76914336	76946791
chr5	77085846	77090209
chr5	77091689	77097369
chr5	77119373	77147534
chr5	77148675	77151101
chr5	79331352	79334406
chr5	79852084	79863137
chr5	92944551	92948198
chr5	94606602	94610511
chr5	94612534	94637672
chr5	110398742	110410286
chr5	111748902	111754463
chr5	113698468	113702623
chr5	114506067	114519642
chr5	121644351	121651303
chr5	122414634	122440910
chr5	132746829	132752085
chr5	132943098	132951500
chr5	134741264	134744249
chr5	134745295	134758208
chr5	134866335	134872162
chr5	135229211	135278867
chr5	137575623	137580452
chr5	145713502	145718115
chr5	145719535	145729800
chr5	145800575	145804620
chr5	145807382	145816472
chr5	153848810	153879192
chr5	161259755	161264951
chr5	161270211	161273462
chr5	161275582	161289426
chr5	161292781	161299575
chr5	161384958	161389475
chr5	161392134	161400671
chr5	161446288	161455644
chr5	161495636	161504662
chr5	161505907	161512259
chr5	167000965	167005150
chr5	168320466	168324741
chr5	168341775	168348704
chr5	170732210	170738472
chr5	170739383	170760910
chr5	172653120	172684748
chr5	174143662	174163264
chr5	174287006	174291466
chr5	180113393	180117693
chr5	180477749	180479878
chr5	180538312	180546597
chr5	180819861	180829941
chr6	70083	82735
chr6	124110	128980
chr6	269038	273938
chr6	371103	374884
chr6	387242	401524
chr6	411087	414196
chr6	726233	735483
chr6	790957	804415
chr6	817617	822197
chr6	964421	969801
chr6	996968	1003477
chr6	1041219	1046481
chr6	1227359	1233727
chr6	1247439	1252511
chr6	1295888	1299032
chr6	1306034	1316847
chr6	1363925	1367765
chr6	1369526	1389326
chr6	1390266	1399527
chr6	2882483	2887192
chr6	3228819	3234904
chr6	4106399	4112338
chr6	7511171	7515911
chr6	7528866	7585182
chr6	7723248	7726445
chr6	7727390	7737297
chr6	7741939	7745537
chr6	10383771	10404213
chr6	10405462	10412809
chr6	10413963	10426323
chr6	10833682	10838303
chr6	10840438	10844214
chr6	10884653	10888446
chr6	10930132	10935747
chr6	10936831	10940246
chr6	10946037	10950026
chr6	10979599	10984212
chr6	11011635	11044158
chr6	11045021	11051730
chr6	26677356	26685271
chr6	26686416	26705029
chr6	26711807	26733262
chr6	26745408	26755261
chr6	26769028	26790274
chr6	27525450	27535422
chr6	28698032	28707339
chr6	28710556	28716573
chr6	28729213	28756897
chr6	28777412	28787798
chr6	28789724	28797345
chr6	30322478	30332393
chr6	30392053	30395836
chr6	30404270	30415271
chr6	30424324	30440200
chr6	30444951	30450785
chr6	31197961	31204841
chr6	31217142	31221687
chr6	31241916	31247123
chr6	31278772	31284725
chr6	31326908	31342011
chr6	32305522	32308746
chr6	32315147	32322924
chr6	32343660	32350064
chr6	32370035	32377971
chr6	32386908	32390380
chr6	32717530	32722823
chr6	32733845	32737445
chr6	32758944	32761059
chr6	32766305	32774158
chr6	32873358	32885741
chr6	32887324	32891080
chr6	32997971	33008312
chr6	33013638	33017290
chr6	33075396	33078811
chr6	36249945	36254571
chr6	38679922	38683646
chr6	41280750	41286722
chr6	41290259	41299300
chr6	41341362	41343275
chr6	43206963	43211263
chr6	44258755	44264819
chr6	44285790	44289709
chr6	44294058	44299528
chr6	44308775	44313732
chr6	46454516	46458578
chr6	46459586	46465628
chr6	46700044	46705090
chr6	50676534	50685631
chr6	50783779	50796060
chr6	50809936	50816517
chr6	55036292	55041931
chr6	58137698	58159194
chr6	58176548	58183921
chr6	63988538	63993742
chr6	70993098	70998388
chr6	71022449	71025827
chr6	71660813	71665196
chr6	72881577	72896520
chr6	78279196	78287217
chr6	78288027	78292762
chr6	80656985	80660578
chr6	84412730	84418442
chr6	85445275	85488152
chr6	85591011	85617716
chr6	88871837	88875517
chr6	97373102	97378822
chr6	100022428	100034503
chr6	100035322	100069300
chr6	100890760	100920921
chr6	101847544	101849851
chr6	106435523	106440088
chr6	106442243	106457917
chr6	106460778	106466991
chr6	106471901	106476773
chr6	106497550	106503711
chr6	106532831	106552259
chr6	106832271	106839121
chr6	106885021	106892587
chr6	108114281	108121162
chr6	108409373	108414994
chr6	108420088	108439698
chr6	108440737	108469584
chr6	108470901	108503995
chr6	108505718	108511295
chr6	111409292	111413416
chr6	117198470	117201920
chr6	117581044	117598961
chr6	119671696	119682722
chr6	123314744	123317556
chr6	124125430	124128680
chr6	126059497	126068831
chr6	126070780	126077526
chr6	126084078	126085539
chr6	133563224	133570156
chr6	134161833	134179552
chr6	134192149	134231939
chr6	135416326	135421409
chr6	137307613	137313538
chr6	137367304	137371513
chr6	137651301	137663214
chr6	137664948	137665721
chr6	137793101	137843713
chr6	138475958	138486015
chr6	143989101	144003724
chr6	144014515	144014576
chr6	144015355	144020155
chr6	144026570	144036032
chr6	144063765	144076720
chr6	144381331	144395116
chr6	150249364	150254608
chr6	150255985	150263405
chr6	150268367	150281736
chr6	150285595	150321588
chr6	150322958	150326101
chr6	150329758	150340687
chr6	150357740	150361856
chr6	150460324	150468456
chr6	152125216	152140338
chr6	166650736	166654255
chr6	166665995	166670785
chr6	170600653	170604789
chr6	170605986	170609119
chr6	170906570	170922679
chr6	170925836	170931166
chr6	170980030	170985631
chr7	324830	329478
chr7	332403	334570
chr7	350877	356449
chr7	442171	444877
chr7	944998	946295
chr7	1224511	1227524
chr7	1249657	1253010
chr7	1264335	1275746
chr7	1277320	1286680
chr7	15720816	15725709
chr7	15727484	15730361
chr7	19131075	19187328
chr7	19190897	19203158
chr7	19700623	19705229
chr7	20810459	20841412
chr7	21286398	21293888
chr7	24323702	24327345
chr7	25892257	25915146
chr7	25917771	25923477
chr7	26409306	26419694
chr7	26698628	26705862
chr7	26709239	26715455
chr7	26721459	26738316
chr7	26766506	26771510
chr7	26878052	26904819
chr7	26955851	26961017
chr7	27164317	27248222
chr7	27260545	27268458
chr7	27279323	27290909
chr7	29585433	29593113
chr7	29603547	29611092
chr7	30978761	30990370
chr7	32338466	32342808
chr7	33944693	33951638
chr7	35279595	35304087
chr7	43150378	43156954
chr7	48066330	48069715
chr7	54609846	54612960
chr7	64577122	64590893
chr7	64597718	64601514
chr7	64974650	64980863
chr7	65018674	65022950
chr7	65028490	65044380
chr7	65094903	65101836
chr7	65109034	65112492
chr7	67082551	67087943
chr7	79498647	79504605
chr7	79507309	79513842
chr7	89945063	89955087
chr7	93198622	93208286
chr7	96612128	96661754
chr7	97356609	97370209
chr7	98209270	98211717
chr7	98219086	98223441
chr7	99430255	99433599
chr7	100698081	100702054
chr7	101446120	101449023
chr7	102331305	102336347
chr7	102828313	102831752
chr7	103083081	103086014
chr7	103622793	103629853
chr7	106270942	106274819
chr7	116958769	116963092
chr7	120968789	120977554
chr7	121934380	121960452
chr7	126889412	126891963
chr7	127821769	127827612
chr7	128001864	128007380
chr7	129421918	129423933
chr7	130406639	130410648
chr7	130411540	130418367
chr7	130419145	130440414
chr7	130460150	130464552
chr7	139880424	139885608
chr7	140774136	140778924
chr7	142345832	142354951
chr7	142516177	142518923
chr7	143056236	143058424
chr7	143060007	143064073
chr7	150847262	150850858
chr7	150856665	150867855
chr7	154898120	154901964
chr7	155163555	155176982
chr7	155241881	155268067
chr7	155284764	155286687
chr7	155290301	155320346
chr7	155322969	155326516
chr7	155602186	155606459
chr7	156789888	156792423
chr7	156793304	156802615
chr7	156803569	156823567
chr8	78877	90248
chr8	133066	137406
chr8	7667452	7671375
chr8	9758137	9777955
chr8	10588323	10590813
chr8	10591765	10596109
chr8	10598914	10605010
chr8	11122276	11131413
chr8	11206143	11210192
chr8	11225228	11229534
chr8	11240714	11245947
chr8	11250415	11255856
chr8	11497679	11504310
chr8	11525263	11527883
chr8	11529409	11585186
chr8	11587631	11593106
chr8	11802848	11807520
chr8	11858733	11866655
chr8	19794809	19801050
chr8	23478856	23484884
chr8	23521856	23531697
chr8	23540479	23547449
chr8	23550135	23574268
chr8	24765577	24775777
chr8	24803606	24834711
chr8	24969004	24979773
chr8	24986583	24994514
chr8	25792669	25798236
chr8	25816353	25826202
chr8	25827942	25836640
chr8	25855271	25860328
chr8	25864207	25872564
chr8	25893060	25910889
chr8	25949286	25955564
chr8	27335522	27341109
chr8	30242909	30250026
chr8	30878602	30890310
chr8	38603394	38609398
chr8	41162438	41166634
chr8	41749651	41753201
chr8	53478244	53480736
chr8	53776608	53783597
chr8	53814111	53824934
chr8	53849362	53857656
chr8	54765261	54770940
chr8	54785720	54791675
chr8	55348192	55385155
chr8	61191870	61196970
chr8	65483778	65487958
chr8	65488665	65503133
chr8	67857454	67861452
chr8	67869328	67887501
chr8	67894733	67897952
chr8	67899802	67908914
chr8	70977819	70985931
chr8	72460788	72472544
chr8	73449641	73452814
chr8	77573764	77618702
chr8	85092306	85099180
chr8	91085605	91091731
chr8	95641052	95644064
chr8	95650604	95662983
chr8	99953647	99977396
chr8	101100376	101111268
chr8	104512992	104530652
chr8	114443126	114449365
chr8	117888845	117897310
chr8	132053200	132057184
chr8	142916333	142920632
chr8	144508096	144510737
chr8	144843226	144848678
chr9	69774	72647
chr9	108903	117014
chr9	841522	844849
chr9	962935	969828
chr9	971987	986460
chr9	5299828	5304093
chr9	5332850	5343904
chr9	16413571	16416388
chr9	16419531	16427575
chr9	16568496	16581688
chr9	16584088	16589536
chr9	16590767	16606694
chr9	16608368	16613723
chr9	16616685	16639066
chr9	16639939	16662323
chr9	16667080	16671858
chr9	16672790	16688460
chr9	16710618	16735380
chr9	16801168	16804761
chr9	16824634	16835728
chr9	16849497	16870408
chr9	21313530	21318218
chr9	21379844	21385320
chr9	21388547	21411595
chr9	21552364	21557431
chr9	21560342	21573993
chr9	21575188	21579014
chr9	21657059	21660795
chr9	21699522	21704423
chr9	21717160	21721956
chr9	21791317	21799598
chr9	31805442	31812951
chr9	31822018	31826021
chr9	31826848	31845269
chr9	33520604	33535444
chr9	33540073	33550281
chr9	33634886	33639973
chr9	33674412	33682804
chr9	33750773	33754376
chr9	37005942	37007929
chr9	37011341	37025406
chr9	37030041	37034753
chr9	37036749	37056995
chr9	37645048	37647187
chr9	37651389	37653690
chr9	37731561	37735345
chr9	38610718	38615592
chr9	42736792	42748159
chr9	45353818	45356507
chr9	66489155	66494229
chr9	66508514	66512682
chr9	66859892	66863331
chr9	69192301	69200074
chr9	69783022	69785494
chr9	69787197	69794208
chr9	70147925	70159307
chr9	70398505	70400820
chr9	70403162	70410098
chr9	70918646	70927009
chr9	71933443	71947510
chr9	79624668	79642225
chr9	79732368	79737503
chr9	91846696	91852358
chr9	92835795	92840772
chr9	92943065	92948294
chr9	93401435	93405499
chr9	93564333	93568792
chr9	95557180	95587801
chr9	96706145	96723131
chr9	99984589	99988752
chr9	100584957	100589377
chr9	100606092	100614161
chr9	100616197	100625884
chr9	100687973	100707794
chr9	101105604	101111690
chr9	101476271	101481631
chr9	104494018	104504655
chr9	116574703	116578926
chr9	116579754	116585762
chr9	117268259	117274626
chr9	124101223	124156128
chr9	124203692	124209129
chr9	124932361	124936437
chr9	124972472	124994861
chr9	126751948	126788142
chr9	126792650	126797693
chr9	126927982	126935795
chr9	129019564	129028093
chr9	129370158	129373389
chr9	129376661	129392180
chr9	129475941	129479253
chr9	129486151	129490463
chr9	133535304	133539836
chr9	134996640	135001904
chr9	135014787	135017873
chr9	135038985	135042324
chr9	135287180	135295291
chr9	135298141	135303508
chr9	135361620	135365554
chr9	135451203	135464973
chr9	135692095	135699383
chr9	136145116	136150242
chr9	136475536	136481825
chr9	136483201	136488254
chr9	137863350	137866981
chr9	139085624	139093864
chr9	141080710	141083686
chr9	141121484	141124010
chrX	2938508	2941923
chrX	3021185	3026411
chrX	3722930	3727241
chrX	11684586	11688104
chrX	13371117	13374241
chrX	13831973	13835216
chrX	15865076	15872314
chrX	16889731	16901714
chrX	19135791	19139968
chrX	19231232	19236976
chrX	21886508	21892228
chrX	22323512	22328188
chrX	23352989	23359343
chrX	25025388	25030876
chrX	25032537	25045449
chrX	37190062	37201718
chrX	40884124	40887758
chrX	45166277	45169852
chrX	45688095	45694696
chrX	45711327	45714658
chrX	45786267	45792031
chrX	46764941	46770535
chrX	53347945	53361324
chrX	70943204	70950387
chrX	70973208	70977348
chrX	70992976	70996806
chrX	71518803	71532640
chrX	102512805	102518560
chrX	102521141	102532879
chrX	102589151	102591822
chrX	107967243	107978927
chrX	110032557	110038442
chrX	113664097	113667488
chrX	113682455	113686729
chrX	113810966	113818313
chrX	113819470	113834997
chrX	113914788	113921177
chrX	113925242	113928878
chrX	114814292	114819897
chrX	114825342	114827980
chrX	114879007	114881640
chrX	118722947	118726267
chrX	119085826	119088881
chrX	119116621	119121006
chrX	119125048	119138630
chrX	130983231	130988476
chrX	133310388	133314834
chrX	134233611	134237350
chrX	135569585	135575363
chrX	152418905	152424617
chrX	153105294	153111202
chrY	13637377	13640609

## Sheet: DIPG13 H3K27M
Chromosome	Start position	End position
chr1	1350347	1352138
chr1	2052841	2056269
chr1	2065183	2067428
chr1	2355834	2358230
chr1	2461317	2465538
chr1	3266318	3271429
chr1	3281934	3284044
chr1	3357316	3360184
chr1	3778454	3780797
chr1	4739910	4741796
chr1	5551675	5555264
chr1	6660054	6664989
chr1	6926914	6931893
chr1	8077097	8080484
chr1	8196842	8198719
chr1	8359979	8363804
chr1	8430162	8434806
chr1	8467787	8470907
chr1	8480860	8483671
chr1	8486970	8491119
chr1	8498015	8502196
chr1	8519320	8527742
chr1	8585493	8589384
chr1	8631130	8633993
chr1	8739962	8743086
chr1	8746624	8748455
chr1	8760198	8768178
chr1	8771318	8774784
chr1	8812391	8816354
chr1	8876904	8879648
chr1	8881155	8883639
chr1	8949004	8951248
chr1	9006279	9008621
chr1	9370148	9372374
chr1	9881366	9883132
chr1	9884972	9888476
chr1	10093095	10095848
chr1	10237740	10241857
chr1	10353741	10357157
chr1	10447389	10449076
chr1	10581304	10584028
chr1	11039032	11040696
chr1	11168831	11171394
chr1	11257594	11259809
chr1	11558780	11561044
chr1	11967472	11970468
chr1	12092792	12096137
chr1	14027122	14030867
chr1	14072970	14078888
chr1	14837061	14838930
chr1	14926030	14929954
chr1	14953206	14956153
chr1	14976388	14978507
chr1	14996964	14999613
chr1	15504959	15508440
chr1	15596589	15600984
chr1	15709949	15714171
chr1	16160446	16163305
chr1	16169684	16174506
chr1	16174972	16178354
chr1	16209434	16213646
chr1	16291488	16293328
chr1	16574230	16577781
chr1	16836556	16842062
chr1	16937421	16942388
chr1	16989968	16995091
chr1	17065552	17070123
chr1	17221005	17226284
chr1	17228251	17234362
chr1	17435924	17437902
chr1	17864123	17865820
chr1	18556359	18558558
chr1	19731109	19733681
chr1	21443220	21447448
chr1	21465493	21469579
chr1	21475270	21477750
chr1	21978605	21984384
chr1	21998085	22000829
chr1	22029934	22034463
chr1	22265070	22267325
chr1	22349912	22352259
chr1	22414081	22418668
chr1	23494680	23497154
chr1	23693698	23697852
chr1	23792111	23794009
chr1	23881383	23885583
chr1	23885597	23890434
chr1	23902498	23905479
chr1	23923290	23925528
chr1	24289426	24296703
chr1	24334276	24336406
chr1	24343089	24345866
chr1	24717627	24721808
chr1	24743162	24746209
chr1	25662426	25666918
chr1	25758183	25762430
chr1	26221758	26227769
chr1	26251852	26255549
chr1	26349831	26353764
chr1	27016666	27022385
chr1	27047451	27051853
chr1	27108661	27114697
chr1	27383423	27385441
chr1	27755926	27759265
chr1	27762218	27765886
chr1	27777383	27779015
chr1	27995853	28000288
chr1	28306084	28310134
chr1	28411139	28415701
chr1	28572421	28577080
chr1	28840867	28844997
chr1	28968037	28971846
chr1	28974310	28977532
chr1	29251750	29255620
chr1	29280670	29283571
chr1	29582236	29584534
chr1	31197779	31199869
chr1	31769112	31771349
chr1	32389293	32391196
chr1	32526172	32529658
chr1	32614972	32618155
chr1	33470345	33473425
chr1	33807119	33810262
chr1	33827205	33831250
chr1	33846838	33850952
chr1	34630615	34634167
chr1	35637450	35641281
chr1	35666581	35669399
chr1	35833838	35836841
chr1	36102882	36106627
chr1	36189916	36192221
chr1	36398168	36402922
chr1	36830730	36832753
chr1	37118809	37120641
chr1	37296546	37299041
chr1	37453024	37456510
chr1	37500688	37503733
chr1	37547382	37550189
chr1	37699577	37702233
chr1	37858502	37861919
chr1	38940308	38942852
chr1	38962058	38966744
chr1	39191445	39195093
chr1	39254053	39256370
chr1	39278178	39280820
chr1	39568119	39570839
chr1	39571277	39574977
chr1	39638846	39640855
chr1	39656605	39658625
chr1	39668614	39672433
chr1	39677597	39680835
chr1	39701728	39705017
chr1	39730704	39734975
chr1	39736436	39739587
chr1	39862927	39865322
chr1	39903317	39904639
chr1	40102079	40104552
chr1	40310278	40314848
chr1	40839810	40841677
chr1	40855911	40859164
chr1	40885093	40888882
chr1	40914603	40917429
chr1	41173376	41177641
chr1	41467419	41470066
chr1	41702284	41707375
chr1	41863204	41867209
chr1	42641696	42646070
chr1	42724691	42726375
chr1	42780099	42781961
chr1	42786489	42791673
chr1	42797128	42800447
chr1	42845100	42848304
chr1	43145094	43148169
chr1	43229692	43232045
chr1	44301453	44305784
chr1	44513258	44516230
chr1	44828049	44830347
chr1	45313503	45315272
chr1	45668286	45671616
chr1	45983055	45988902
chr1	46151668	46154387
chr1	46325987	46332035
chr1	46594762	46603796
chr1	47108230	47111187
chr1	47157794	47159733
chr1	47778183	47780374
chr1	48932495	48937849
chr1	48957632	48961636
chr1	48988982	48992876
chr1	49075255	49078547
chr1	49092770	49094945
chr1	49412066	49415812
chr1	50555933	50558455
chr1	50568070	50572807
chr1	50573438	50578953
chr1	50716197	50719535
chr1	51116266	51118884
chr1	51126439	51128747
chr1	51132920	51135987
chr1	51163521	51168692
chr1	51294362	51296020
chr1	51317440	51321309
chr1	51432555	51435220
chr1	51440291	51443386
chr1	51885345	51889214
chr1	51981098	51984004
chr1	52198755	52202961
chr1	52249561	52253045
chr1	52418587	52424044
chr1	52604913	52612185
chr1	52617989	52620550
chr1	53419711	53421741
chr1	53881332	53885913
chr1	54336573	54339248
chr1	54516923	54519764
chr1	54789201	54792203
chr1	54861498	54864212
chr1	55635888	55640505
chr1	55674737	55684434
chr1	55739358	55743620
chr1	56127795	56133752
chr1	56752741	56754756
chr1	56827193	56830673
chr1	56900649	56903888
chr1	57015038	57019589
chr1	57023001	57025963
chr1	57027695	57031175
chr1	57040389	57046554
chr1	57602485	57606190
chr1	57627385	57630286
chr1	57679047	57683336
chr1	57724636	57726485
chr1	57850315	57852888
chr1	58712915	58716500
chr1	59339304	59342328
chr1	59760097	59763991
chr1	60171669	60174719
chr1	60215207	60219161
chr1	60617958	60621669
chr1	60867384	60869652
chr1	60900771	60902599
chr1	61179299	61182223
chr1	61297617	61300750
chr1	61323197	61326145
chr1	61330709	61335273
chr1	61376215	61378744
chr1	61434734	61437806
chr1	61470065	61472912
chr1	61520523	61523460
chr1	61541654	61547938
chr1	61574490	61579048
chr1	61583679	61588266
chr1	61595936	61599562
chr1	61616846	61619664
chr1	61646203	61652235
chr1	61658546	61665499
chr1	61671814	61675223
chr1	61685701	61695327
chr1	61703407	61711511
chr1	61732596	61735842
chr1	61801609	61805289
chr1	61916109	61921561
chr1	62317782	62320060
chr1	62761289	62766732
chr1	63154112	63157425
chr1	63340064	63342921
chr1	63475732	63478275
chr1	63553069	63556244
chr1	63589193	63592748
chr1	63598556	63602640
chr1	63987244	63990860
chr1	64978537	64982986
chr1	65003005	65006089
chr1	65211120	65213360
chr1	65429509	65432180
chr1	65533281	65536576
chr1	65614090	65618054
chr1	65728295	65731657
chr1	65772211	65777631
chr1	65882974	65888987
chr1	66428774	66432554
chr1	66443766	66446399
chr1	66455657	66462403
chr1	66661823	66664230
chr1	66703965	66711429
chr1	66716072	66719631
chr1	66743121	66745398
chr1	66804171	66808249
chr1	66813183	66821296
chr1	66996606	67003276
chr1	67007778	67011342
chr1	67019446	67023813
chr1	67390812	67393733
chr1	67503094	67505499
chr1	67516952	67520625
chr1	67869674	67874457
chr1	68110698	68113283
chr1	68151985	68155662
chr1	68177229	68180901
chr1	68200683	68203838
chr1	68256612	68261158
chr1	68295874	68298838
chr1	68315724	68317364
chr1	68694691	68696730
chr1	68778048	68781163
chr1	68848874	68851347
chr1	68961133	68963825
chr1	70669574	70672616
chr1	70817911	70820979
chr1	70875277	70878474
chr1	70923132	70925269
chr1	71483880	71485800
chr1	72748412	72752921
chr1	73099857	73104656
chr1	73115564	73117989
chr1	74662574	74665801
chr1	74807569	74812748
chr1	74821057	74825794
chr1	74846594	74850361
chr1	74968934	74973065
chr1	76190152	76192545
chr1	77331055	77333598
chr1	78108186	78110737
chr1	78353259	78356815
chr1	78404316	78410552
chr1	78466775	78473048
chr1	79082574	79087386
chr1	79114060	79118435
chr1	82340588	82345159
chr1	82538065	82540647
chr1	82661482	82665573
chr1	82690570	82694072
chr1	82928462	82931835
chr1	83030751	83033021
chr1	83415242	83418508
chr1	84461217	84464810
chr1	84541643	84545368
chr1	84628566	84631178
chr1	84719261	84721607
chr1	84764554	84771092
chr1	84969430	84971672
chr1	85038544	85041402
chr1	85153686	85155978
chr1	85185068	85187352
chr1	85740785	85744010
chr1	85871536	85875926
chr1	85927969	85932555
chr1	85991028	85994276
chr1	87169095	87173083
chr1	87380146	87383638
chr1	87598673	87603018
chr1	87619148	87622801
chr1	87632416	87635556
chr1	87794455	87800758
chr1	87874642	87877653
chr1	87891693	87895547
chr1	88107253	88110063
chr1	88149190	88152568
chr1	88327562	88329942
chr1	88797206	88800399
chr1	89148538	89152640
chr1	89195874	89198057
chr1	89294808	89298277
chr1	89450195	89452104
chr1	89528805	89531517
chr1	89991831	89994454
chr1	90294571	90300269
chr1	90306534	90309734
chr1	90401732	90405797
chr1	90450655	90453102
chr1	91867398	91871548
chr1	91965724	91969150
chr1	92348913	92352151
chr1	92763409	92767421
chr1	93248515	93251519
chr1	93341139	93345544
chr1	93642932	93646319
chr1	93809797	93814028
chr1	94017111	94020677
chr1	94309755	94312336
chr1	94881942	94884049
chr1	95328956	95334022
chr1	95338149	95341067
chr1	95389937	95392164
chr1	95786370	95789806
chr1	95904523	95907879
chr1	96105679	96110106
chr1	97471034	97474513
chr1	98382305	98388885
chr1	98498016	98502463
chr1	98511661	98520783
chr1	98562968	98565356
chr1	98566503	98570073
chr1	98852601	98855875
chr1	98867548	98872759
chr1	99021353	99025161
chr1	99394394	99398915
chr1	99439473	99444113
chr1	99470376	99473305
chr1	99996535	99998832
chr1	100653219	100655787
chr1	100815705	100821955
chr1	101358822	101361834
chr1	102057862	102059780
chr1	102174100	102176102
chr1	102370136	102372457
chr1	102429348	102431917
chr1	103091910	103096708
chr1	103570696	103578521
chr1	103714778	103720097
chr1	103860224	103863855
chr1	103999538	104003422
chr1	104144200	104147638
chr1	104216416	104220437
chr1	105960930	105962585
chr1	107935465	107938913
chr1	108232294	108235890
chr1	108476498	108481387
chr1	108504404	108507602
chr1	108742766	108746069
chr1	109098942	109102770
chr1	109356095	109360942
chr1	109370581	109374309
chr1	109418507	109422346
chr1	109437204	109441329
chr1	109624918	109627901
chr1	109840914	109844197
chr1	109925255	109929420
chr1	109933823	109939996
chr1	109940501	109944008
chr1	109967765	109970899
chr1	110071660	110075410
chr1	110878761	110882701
chr1	111098402	111100503
chr1	111107225	111109359
chr1	111212727	111217431
chr1	111255643	111258587
chr1	111505038	111508511
chr1	111681285	111685127
chr1	111770320	111772189
chr1	111792163	111794903
chr1	112077499	112079805
chr1	112162502	112165669
chr1	112275782	112281680
chr1	112420580	112424814
chr1	112446087	112449139
chr1	112449963	112452894
chr1	112930093	112932679
chr1	113214420	113217688
chr1	113495883	113501208
chr1	113584231	113586242
chr1	113956116	113959062
chr1	114299862	114305679
chr1	116550113	116553077
chr1	116976995	116979740
chr1	117349363	117352604
chr1	117395345	117399531
chr1	117599960	117603186
chr1	117909692	117914690
chr1	117978661	117980253
chr1	118344108	118346430
chr1	119680182	119683594
chr1	119734447	119737510
chr1	120254107	120256445
chr1	120555110	120560871
chr1	120578627	120582688
chr1	120583771	120589864
chr1	120600958	120605564
chr1	120607820	120614871
chr1	120631266	120634862
chr1	120778360	120781925
chr1	120787629	120792353
chr1	120797675	120800356
chr1	120815956	120820089
chr1	120836252	120842585
chr1	121096186	121100560
chr1	121101617	121105644
chr1	121108720	121112338
chr1	121134274	121137974
chr1	142796945	142801153
chr1	143235481	143239585
chr1	143347028	143352613
chr1	143909379	143917953
chr1	143933461	143936276
chr1	143951492	143954887
chr1	143959821	143964648
chr1	143970461	143973303
chr1	144008082	144010854
chr1	144020183	144024162
chr1	144088280	144092718
chr1	144698351	144700845
chr1	144705830	144709952
chr1	144926077	144933659
chr1	144940133	144943486
chr1	144973569	144976597
chr1	144981000	144985250
chr1	145016503	145019185
chr1	145026698	145031979
chr1	145038129	145043684
chr1	145058963	145061914
chr1	145073088	145077055
chr1	145090277	145100386
chr1	145137871	145142555
chr1	145158486	145161821
chr1	145185028	145190291
chr1	145206324	145214436
chr1	145216201	145221432
chr1	145231374	145234983
chr1	145239261	145242848
chr1	145260190	145265950
chr1	145266952	145270672
chr1	145281796	145286117
chr1	145393506	145400430
chr1	145435374	145449649
chr1	145454176	145457693
chr1	145469230	145472422
chr1	145475290	145480697
chr1	145506678	145508403
chr1	145541762	145544694
chr1	145608559	145611771
chr1	145681265	145684283
chr1	146641599	146646502
chr1	147011411	147015859
chr1	147050925	147052564
chr1	147068538	147071733
chr1	147140225	147143356
chr1	147400139	147403922
chr1	148555257	148558732
chr1	148855659	148859497
chr1	149222494	149225589
chr1	149780190	149785804
chr1	149801133	149807040
chr1	149808932	149811928
chr1	149814042	149824841
chr1	149830193	149836050
chr1	149854896	149861518
chr1	149979315	149985582
chr1	150037264	150041490
chr1	150118351	150122074
chr1	150132270	150137660
chr1	150153380	150157453
chr1	150207832	150209848
chr1	150227515	150232791
chr1	150252700	150255305
chr1	150334318	150340721
chr1	150487213	150490142
chr1	150504018	150506243
chr1	150533435	150534918
chr1	150539145	150544499
chr1	150550001	150552996
chr1	150847123	150850134
chr1	150977829	150981214
chr1	151030066	151035162
chr1	151036553	151038641
chr1	151167539	151169309
chr1	151299857	151301673
chr1	151312908	151315405
chr1	151318832	151320843
chr1	151466380	151468537
chr1	151510889	151515038
chr1	151699051	151702314
chr1	151760321	151766109
chr1	151812038	151815046
chr1	151962596	151965058
chr1	152766727	152769900
chr1	153564476	153566264
chr1	153632828	153638689
chr1	153643259	153645840
chr1	153649676	153652763
chr1	153852591	153856672
chr1	153899127	153903443
chr1	153938366	153940751
chr1	153949388	153951894
chr1	153958141	153960595
chr1	154908829	154911968
chr1	154926514	154928918
chr1	154943219	154949325
chr1	154954502	154956251
chr1	155021627	155025520
chr1	155056429	155058775
chr1	155065360	155069016
chr1	155195109	155198259
chr1	155211783	155217569
chr1	155277867	155279476
chr1	155362435	155366431
chr1	155468373	155474400
chr1	155529706	155535216
chr1	155614818	155617656
chr1	155623260	155626930
chr1	155825754	155829622
chr1	155829987	155832077
chr1	155839206	155843692
chr1	155879259	155885094
chr1	155937760	155942512
chr1	155951554	155954822
chr1	156091790	156095234
chr1	156097502	156100381
chr1	156306575	156308673
chr1	156357534	156361281
chr1	156371451	156376698
chr1	156381815	156388171
chr1	156391480	156404232
chr1	156406200	156409267
chr1	156412745	156415092
chr1	156570824	156572376
chr1	156577075	156579412
chr1	156584450	156587663
chr1	156605152	156614417
chr1	156629103	156635074
chr1	156697102	156701166
chr1	156710301	156712888
chr1	156735658	156737747
chr1	156975446	156979337
chr1	157002407	157006838
chr1	157012491	157015827
chr1	157107986	157110690
chr1	158966056	158972602
chr1	159154419	159158978
chr1	159885116	159887576
chr1	159992727	159996506
chr1	160000109	160005389
chr1	160031629	160034831
chr1	160040071	160042007
chr1	160049099	160051984
chr1	160070711	160073044
chr1	160690911	160693959
chr1	160805438	160809724
chr1	160811725	160814343
chr1	161014394	161016707
chr1	161100426	161103881
chr1	161135305	161136780
chr1	161367765	161371526
chr1	161411142	161414698
chr1	161421637	161424539
chr1	161428899	161432283
chr1	161434861	161438786
chr1	161481631	161485454
chr1	161497869	161504505
chr1	161563417	161566818
chr1	161579914	161584711
chr1	161732343	161736954
chr1	162039941	162043285
chr1	162060449	162062734
chr1	162086144	162088927
chr1	162112892	162116950
chr1	162134493	162138965
chr1	162156715	162159465
chr1	162173830	162177798
chr1	162181142	162185727
chr1	162213936	162221121
chr1	162292559	162295668
chr1	162601794	162604578
chr1	162645280	162648002
chr1	162664437	162668091
chr1	162701013	162704011
chr1	162790523	162794538
chr1	164263131	164267274
chr1	164487398	164489558
chr1	164525695	164533468
chr1	164555226	164558883
chr1	164570143	164573316
chr1	164605500	164607763
chr1	164674512	164678136
chr1	165599615	165604005
chr1	165664849	165669523
chr1	165706408	165708998
chr1	165795523	165799468
chr1	165852418	165855329
chr1	166810249	166814068
chr1	166844121	166846966
chr1	166913572	166920356
chr1	166940809	166944624
chr1	167104994	167108519
chr1	167186939	167189961
chr1	167191239	167194688
chr1	167207355	167210074
chr1	167295119	167301605
chr1	167337531	167341383
chr1	167522668	167525762
chr1	167683202	167686978
chr1	167689446	167693867
chr1	167720981	167727819
chr1	167873599	167876235
chr1	167902705	167908911
chr1	168146543	168150650
chr1	168194532	168199067
chr1	168433990	168443559
chr1	168444766	168447305
chr1	168466463	168469323
chr1	168581266	168584473
chr1	168585277	168589104
chr1	168972102	168976386
chr1	169070526	169072892
chr1	169075293	169080401
chr1	169335863	169338539
chr1	169393984	169398661
chr1	169451172	169457435
chr1	169536574	169540223
chr1	169966891	169970876
chr1	170041099	170045923
chr1	170114515	170121224
chr1	170131325	170133129
chr1	170252559	170255949
chr1	170461887	170465592
chr1	170487509	170490369
chr1	170500420	170502987
chr1	170586509	170591269
chr1	170630919	170635350
chr1	170660739	170670353
chr1	171048701	171052386
chr1	171109807	171113640
chr1	171453518	171457119
chr1	171668520	171672244
chr1	171710925	171714239
chr1	171748928	171751292
chr1	171811116	171818044
chr1	171830985	171834606
chr1	171845049	171847860
chr1	171865395	171869408
chr1	171877032	171880440
chr1	172109317	172115547
chr1	172147783	172151808
chr1	172289417	172293928
chr1	172318037	172322449
chr1	172348089	172351312
chr1	172366646	172369496
chr1	172427936	172431813
chr1	172500091	172507638
chr1	173090844	173093419
chr1	173158139	173160728
chr1	173173558	173178189
chr1	173397239	173400772
chr1	173475654	173478273
chr1	173683207	173686447
chr1	173792598	173795171
chr1	173836323	173840026
chr1	174009142	174010473
chr1	174126183	174130501
chr1	174230904	174234799
chr1	174766953	174773638
chr1	174859007	174860732
chr1	174899091	174902822
chr1	174966767	174970793
chr1	175038849	175042958
chr1	175521916	175525834
chr1	175558996	175562174
chr1	175565407	175568137
chr1	175635715	175637979
chr1	175640672	175645267
chr1	175647764	175651082
chr1	175709819	175714375
chr1	175722389	175726437
chr1	175832402	175835497
chr1	176173001	176176116
chr1	177130054	177136393
chr1	177136979	177144482
chr1	177175208	177180553
chr1	178060936	178066736
chr1	178229520	178233973
chr1	178303809	178306930
chr1	178311163	178314168
chr1	178339188	178344858
chr1	178349663	178353414
chr1	178561479	178565701
chr1	178619629	178622576
chr1	178694923	178698507
chr1	178837451	178843051
chr1	178973623	178977527
chr1	178985164	178988361
chr1	178990084	178995067
chr1	178998002	179002863
chr1	179142614	179147210
chr1	179262091	179264731
chr1	179848547	179854911
chr1	179888914	179893443
chr1	179921726	179928135
chr1	180256580	180260593
chr1	180312174	180315913
chr1	180469788	180473807
chr1	180600592	180605364
chr1	180894045	180898493
chr1	180989229	180992765
chr1	181058696	181070955
chr1	181398256	181401046
chr1	182038184	182039961
chr1	182082635	182085105
chr1	182088997	182092102
chr1	182131474	182136556
chr1	182139675	182143909
chr1	182203807	182206889
chr1	182270513	182272037
chr1	182582697	182589173
chr1	182624813	182627372
chr1	182719031	182723226
chr1	182855671	182860906
chr1	182931738	182935511
chr1	182989986	182997225
chr1	183006186	183015304
chr1	183036984	183041963
chr1	183057198	183063120
chr1	183064406	183068156
chr1	183370946	183375621
chr1	183438466	183441496
chr1	183466664	183470374
chr1	183600841	183610342
chr1	183699436	183705446
chr1	183746028	183748405
chr1	183772041	183777720
chr1	183783793	183788698
chr1	183809990	183812996
chr1	183849940	183851769
chr1	183935932	183941469
chr1	183969943	183973314
chr1	183986647	184009767
chr1	184019211	184023889
chr1	184045876	184049646
chr1	184120215	184123686
chr1	184168680	184172296
chr1	184186501	184189224
chr1	184263422	184272199
chr1	184356526	184360107
chr1	184373464	184376887
chr1	184474851	184478930
chr1	184501115	184504064
chr1	184528973	184532152
chr1	184542721	184545316
chr1	184575592	184581571
chr1	184582759	184585702
chr1	184603469	184606622
chr1	184624017	184628660
chr1	184720838	184726165
chr1	185011420	185021656
chr1	185283050	185288413
chr1	186342514	186344751
chr1	186797378	186800103
chr1	186840108	186844185
chr1	187228768	187233913
chr1	187350527	187353871
chr1	187357971	187360839
chr1	187449168	187452734
chr1	187657239	187659360
chr1	189343036	189345905
chr1	190061314	190066846
chr1	190108461	190111897
chr1	190211547	190214841
chr1	190349312	190354878
chr1	190440582	190451112
chr1	191224012	191226376
chr1	191618287	191621204
chr1	192405129	192409308
chr1	192457474	192461964
chr1	192506687	192510346
chr1	192676888	192680965
chr1	192705580	192709284
chr1	192755194	192758922
chr1	192774866	192781578
chr1	192894656	192897839
chr1	193026922	193030856
chr1	193071756	193075823
chr1	193090448	193093477
chr1	193150852	193159130
chr1	193303350	193306485
chr1	193316329	193319684
chr1	193516723	193519246
chr1	193992158	193995210
chr1	194410964	194413946
chr1	196574436	196579629
chr1	196930938	196932218
chr1	197114142	197116722
chr1	197166679	197172333
chr1	197202910	197205202
chr1	197237067	197239622
chr1	197404015	197409336
chr1	197431813	197435384
chr1	198125026	198131588
chr1	198144191	198151651
chr1	198159091	198162439
chr1	198170015	198177437
chr1	198459026	198462512
chr1	198650124	198652522
chr1	198871560	198878975
chr1	198897516	198908196
chr1	199130096	199134386
chr1	200043543	200052795
chr1	200096964	200100776
chr1	200369077	200374137
chr1	200593183	200597432
chr1	200636369	200641534
chr1	200691184	200695317
chr1	200708912	200711741
chr1	200768644	200773219
chr1	200783601	200787027
chr1	200794775	200797794
chr1	200981772	200986801
chr1	201063319	201066459
chr1	201134747	201137734
chr1	201211967	201217929
chr1	201416829	201421444
chr1	201462946	201466598
chr1	201479560	201482548
chr1	201499482	201503716
chr1	201506271	201510961
chr1	201533448	201536500
chr1	201615533	201619887
chr1	201660119	201663976
chr1	201698939	201701429
chr1	201718019	201723060
chr1	201727195	201730509
chr1	201736560	201741296
chr1	201758797	201762583
chr1	201842857	201847573
chr1	202172236	202174852
chr1	202298211	202301488
chr1	202310648	202313317
chr1	202316864	202319450
chr1	202773091	202776511
chr1	202811254	202813941
chr1	202829652	202833151
chr1	202856177	202860242
chr1	202936499	202938950
chr1	203098328	203100886
chr1	203112482	203119258
chr1	203121513	203123750
chr1	203155715	203160357
chr1	203237380	203240300
chr1	203246615	203249587
chr1	203291055	203298413
chr1	203335011	203337305
chr1	203428426	203431208
chr1	203443034	203451079
chr1	203475141	203477489
chr1	203491048	203494850
chr1	203557809	203559535
chr1	203594516	203597817
chr1	203641039	203643700
chr1	203645870	203648768
chr1	204045179	204048830
chr1	204051547	204054960
chr1	204061707	204065660
chr1	204223555	204226239
chr1	204231376	204234016
chr1	204461239	204465426
chr1	204471852	204478572
chr1	204602059	204604632
chr1	204605349	204608496
chr1	204690551	204694443
chr1	204836418	204840326
chr1	205154495	205156858
chr1	205178482	205181700
chr1	205205073	205207591
chr1	205216150	205219630
chr1	205285800	205291559
chr1	205323138	205332475
chr1	205344704	205347711
chr1	205388794	205392775
chr1	205681217	205684792
chr1	205780584	205781974
chr1	206075075	206081679
chr1	206087641	206091865
chr1	206097013	206099235
chr1	206115478	206118129
chr1	206134134	206142085
chr1	206482408	206487184
chr1	206547057	206550962
chr1	206551823	206554681
chr1	206559878	206563529
chr1	206806970	206811611
chr1	206851445	206855279
chr1	207921644	207927707
chr1	208273254	208277419
chr1	208277991	208281661
chr1	208375507	208377993
chr1	208404902	208409019
chr1	208417964	208423277
chr1	208440105	208442569
chr1	209757802	209761087
chr1	209814045	209818079
chr1	210041908	210044831
chr1	210243299	210248993
chr1	210761485	210765221
chr1	211429704	211432619
chr1	211433168	211435139
chr1	211852529	211855782
chr1	211914776	211918060
chr1	212001684	212003663
chr1	212207257	212210300
chr1	212232540	212236454
chr1	212375913	212378944
chr1	212457908	212466026
chr1	212587845	212590440
chr1	212680322	212682551
chr1	212807775	212811144
chr1	213029348	213035047
chr1	213136287	213139122
chr1	213186496	213189685
chr1	213403961	213406941
chr1	213413976	213421211
chr1	213424447	213427988
chr1	213498628	213501933
chr1	213886589	213889689
chr1	213897020	213899470
chr1	214159399	214170866
chr1	214172821	214177427
chr1	214598933	214602952
chr1	214611055	214615211
chr1	214618411	214621556
chr1	214720326	214724125
chr1	215226335	215229315
chr1	215384938	215386842
chr1	215388150	215391267
chr1	215493838	215496523
chr1	215531793	215535946
chr1	215656372	215660126
chr1	215738475	215744844
chr1	215769398	215773659
chr1	216354900	216360927
chr1	217081757	217085112
chr1	218475975	218479883
chr1	218514859	218517251
chr1	218517720	218525382
chr1	218544674	218549832
chr1	218552895	218555206
chr1	218574225	218577330
chr1	218593104	218595595
chr1	218597040	218600792
chr1	218611259	218616317
chr1	218951214	218953655
chr1	219831748	219836765
chr1	219858808	219861465
chr1	220218011	220220928
chr1	220320196	220324244
chr1	220445513	220449576
chr1	220473328	220475701
chr1	220698724	220705152
chr1	220873129	220875670
chr1	221913041	221918002
chr1	221955664	221959286
chr1	221994756	221997327
chr1	222882885	222887696
chr1	222957119	222960079
chr1	222987239	222991821
chr1	222999320	223004493
chr1	223099127	223104190
chr1	223124826	223128243
chr1	223142697	223145125
chr1	223179887	223187671
chr1	223241590	223244440
chr1	223246196	223250420
chr1	223260179	223262236
chr1	223312830	223315982
chr1	223427542	223429448
chr1	223838198	223842347
chr1	223892374	223895389
chr1	223918810	223922202
chr1	224019218	224021861
chr1	224029514	224033215
chr1	224391645	224394071
chr1	224474864	224478035
chr1	224516718	224519352
chr1	224684716	224687507
chr1	224689647	224692274
chr1	224726567	224731105
chr1	225066242	225068920
chr1	225613445	225617384
chr1	225634431	225636834
chr1	225731841	225734690
chr1	225790022	225793775
chr1	225817129	225821859
chr1	225835116	225840553
chr1	225841218	225844874
chr1	225948527	225951986
chr1	225956990	225960655
chr1	225964297	225966767
chr1	226064531	226066033
chr1	226250154	226253194
chr1	226496540	226499301
chr1	226589345	226592223
chr1	226653480	226655689
chr1	226875524	226878752
chr1	226925376	226928842
chr1	227486075	227488553
chr1	227501685	227509747
chr1	227558505	227561585
chr1	228390877	228394427
chr1	228642597	228653907
chr1	228877609	228880847
chr1	229001514	229003830
chr1	229037739	229040440
chr1	229193454	229196257
chr1	229407114	229410197
chr1	229472672	229478312
chr1	229669590	229672537
chr1	229692218	229695988
chr1	229714133	229719740
chr1	229828220	229831653
chr1	230203805	230206224
chr1	230237580	230241720
chr1	230244984	230250213
chr1	230271052	230274106
chr1	230288254	230290495
chr1	230311579	230314219
chr1	230510224	230512577
chr1	230562254	230564930
chr1	230816542	230819598
chr1	230941796	230944657
chr1	230991812	230996753
chr1	231127369	231130139
chr1	231164024	231168505
chr1	231187810	231192081
chr1	231228326	231230866
chr1	231250701	231254928
chr1	231274237	231276686
chr1	231299813	231303142
chr1	231473052	231476050
chr1	231552203	231560096
chr1	231760964	231766379
chr1	231777995	231781295
chr1	231869950	231873499
chr1	231912623	231915651
chr1	232058522	232067151
chr1	232069734	232073470
chr1	232147168	232150234
chr1	232277083	232280930
chr1	232358349	232363677
chr1	232654324	232657626
chr1	232658205	232661981
chr1	232761998	232765670
chr1	232792103	232796309
chr1	233140993	233143333
chr1	233388433	233392264
chr1	233428137	233431266
chr1	233911999	233915354
chr1	234363723	234366674
chr1	234506748	234510739
chr1	234650735	234652672
chr1	234657772	234660808
chr1	234678038	234687356
chr1	234707599	234710970
chr1	234717080	234722506
chr1	234733271	234743038
chr1	234745922	234751419
chr1	234856914	234861761
chr1	234877616	234882120
chr1	234882814	234885237
chr1	234904848	234908156
chr1	234926447	234929669
chr1	235118815	235121236
chr1	235267442	235271311
chr1	235323457	235326180
chr1	235432156	235435060
chr1	235491178	235495565
chr1	235664918	235670254
chr1	235810132	235812607
chr1	236079530	236082645
chr1	236189964	236192674
chr1	236229015	236232042
chr1	236291004	236296382
chr1	236303249	236305469
chr1	236850186	236854616
chr1	236864881	236870997
chr1	236876583	236878678
chr1	236957623	236960888
chr1	237911157	237912828
chr1	237944986	237947345
chr1	238162294	238166097
chr1	238630774	238634251
chr1	239154238	239156482
chr1	239286290	239291758
chr1	239346504	239350888
chr1	239375180	239378973
chr1	239451530	239453929
chr1	239546976	239554454
chr1	239844070	239846751
chr1	239879057	239885326
chr1	239892551	239896502
chr1	239934531	239938878
chr1	239968967	239975373
chr1	239994213	239998845
chr1	240016762	240022515
chr1	240059581	240061934
chr1	240252274	240260745
chr1	240392982	240395312
chr1	241680579	241682773
chr1	241800621	241802990
chr1	242010581	242013766
chr1	242406528	242409722
chr1	242611756	242614752
chr1	242683139	242687693
chr1	242785625	242787733
chr1	242907198	242909289
chr1	243348882	243352734
chr1	243415172	243420581
chr1	243478200	243481402
chr1	243632050	243635211
chr1	243868736	243881890
chr1	243894087	243896542
chr1	243899804	243904821
chr1	243911932	243918825
chr1	243953879	243957256
chr1	244008783	244013052
chr1	244014250	244017201
chr1	244064332	244068779
chr1	244173415	244177094
chr1	244212790	244218396
chr1	244374677	244377052
chr1	244607854	244613653
chr1	244815365	244819880
chr1	244995404	245015390
chr1	245027484	245031032
chr1	245130276	245133687
chr1	245134061	245137085
chr1	245221856	245224857
chr1	245256349	245260921
chr1	245270639	245273505
chr1	245362843	245365802
chr1	245397772	245399619
chr1	245461320	245463088
chr1	245580218	245582942
chr1	245672884	245677584
chr1	245678451	245680347
chr1	245746868	245749843
chr1	246729090	246731684
chr1	246843048	246845125
chr1	246887652	246890667
chr1	247240402	247243673
chr1	249165429	249169212
chr1	249179631	249182326
chr1	249235566	249238706
chr1	249239482	249240617
chr10	135208	136983
chr10	177009	181369
chr10	374598	379328
chr10	438955	442684
chr10	501175	503634
chr10	528077	530668
chr10	559567	562223
chr10	699834	702964
chr10	704118	707282
chr10	708474	712315
chr10	1075599	1077219
chr10	1411721	1414693
chr10	1778914	1781868
chr10	1795583	1797744
chr10	3311667	3314456
chr10	3824366	3826938
chr10	4324492	4327332
chr10	4357231	4359446
chr10	4862686	4864909
chr10	5411077	5413525
chr10	5455028	5457333
chr10	5727373	5729435
chr10	5733907	5736798
chr10	5750744	5755160
chr10	5851571	5854976
chr10	7124737	7128909
chr10	10378544	10381828
chr10	10800087	10801821
chr10	11046447	11050915
chr10	11052652	11059649
chr10	11060606	11065314
chr10	11184294	11188144
chr10	11204070	11207723
chr10	11250147	11253359
chr10	11573877	11576096
chr10	11614966	11617039
chr10	11725906	11728582
chr10	11974384	11977815
chr10	12548085	12557426
chr10	13261258	13262473
chr10	13272933	13275429
chr10	13279288	13281397
chr10	13288106	13290459
chr10	13305013	13306721
chr10	13313414	13315224
chr10	13725950	13729592
chr10	13926331	13928821
chr10	13929805	13933926
chr10	14034934	14036434
chr10	14042017	14046401
chr10	14047708	14053128
chr10	14064786	14068977
chr10	14097971	14099695
chr10	14212622	14217126
chr10	14666465	14669728
chr10	14689186	14692312
chr10	14693826	14697633
chr10	14775369	14780698
chr10	14878754	14880732
chr10	14918014	14921071
chr10	15125612	15128150
chr10	15182214	15184439
chr10	15207474	15210284
chr10	15612420	15614283
chr10	15759287	15762493
chr10	16698061	16699735
chr10	16704130	16707814
chr10	16935038	16938207
chr10	17005339	17009649
chr10	17027799	17030799
chr10	17047462	17050810
chr10	17241067	17245123
chr10	17272084	17274723
chr10	17685089	17688177
chr10	18293894	18296023
chr10	18423467	18427694
chr10	18430141	18434629
chr10	18467437	18469750
chr10	18489929	18494603
chr10	18690568	18692721
chr10	20561733	20565947
chr10	20587477	20589212
chr10	21806503	21810131
chr10	21811665	21815127
chr10	21820655	21823349
chr10	22012005	22015027
chr10	22210624	22214779
chr10	22264108	22271399
chr10	22282989	22287544
chr10	22288709	22293500
chr10	22298877	22300698
chr10	22340341	22345687
chr10	22374339	22377283
chr10	22516548	22521307
chr10	22543177	22548991
chr10	22601423	22609439
chr10	22611372	22614376
chr10	22789323	22791129
chr10	22842919	22847691
chr10	22912721	22915782
chr10	22962623	22966658
chr10	22987069	22991813
chr10	22999379	23002360
chr10	23137267	23138992
chr10	23200141	23202964
chr10	24367557	24370280
chr10	24496097	24500748
chr10	24527610	24531691
chr10	24911411	24913595
chr10	25235451	25237969
chr10	25246167	25249240
chr10	25369641	25374380
chr10	25401424	25403316
chr10	25843908	25847506
chr10	26736467	26739553
chr10	26742798	26746325
chr10	26828577	26830807
chr10	27080490	27083372
chr10	27146156	27149451
chr10	27529892	27533361
chr10	28973124	28978151
chr10	29056175	29059018
chr10	29075944	29079431
chr10	29126972	29130551
chr10	29193850	29196194
chr10	29227274	29229938
chr10	29295170	29298719
chr10	29370485	29372901
chr10	29389114	29392514
chr10	29445584	29448011
chr10	29533287	29535732
chr10	29592315	29595029
chr10	29604980	29608642
chr10	29843018	29845970
chr10	30520583	30522859
chr10	30671203	30674301
chr10	30725549	30728614
chr10	31072328	31075017
chr10	31255580	31260295
chr10	31261274	31264013
chr10	31306755	31310889
chr10	31445324	31448113
chr10	31635271	31641215
chr10	31801827	31806784
chr10	31957259	31959657
chr10	31995271	31998330
chr10	32037121	32040609
chr10	32045971	32050639
chr10	32090992	32094358
chr10	32214334	32221025
chr10	32265480	32267441
chr10	32620648	32624156
chr10	32664939	32670477
chr10	33226688	33230398
chr10	34488539	34490977
chr10	34853520	34857950
chr10	34864667	34867053
chr10	35068660	35072240
chr10	35089073	35092045
chr10	35483768	35486509
chr10	35504444	35507960
chr10	35696866	35698872
chr10	36378123	36381327
chr10	37012976	37015778
chr10	38146198	38148471
chr10	43038524	43042034
chr10	45965439	45968212
chr10	46008759	46011798
chr10	47053066	47055405
chr10	49571137	49573984
chr10	49717340	49719389
chr10	49732566	49735906
chr10	49804622	49808620
chr10	49883010	49884951
chr10	50290022	50292669
chr10	52255149	52257381
chr10	52265563	52268352
chr10	52275079	52277664
chr10	52335411	52339048
chr10	52379632	52382781
chr10	52384895	52387110
chr10	53059464	53061718
chr10	53355729	53357951
chr10	53378777	53381138
chr10	53525899	53530147
chr10	53573308	53577089
chr10	54593563	54595859
chr10	54639528	54643593
chr10	55139455	55140645
chr10	55422583	55425575
chr10	55840348	55843007
chr10	56424888	56428853
chr10	56554261	56562647
chr10	56776896	56781006
chr10	56783009	56786035
chr10	56807189	56809793
chr10	57384354	57390682
chr10	58344965	58348124
chr10	58856848	58860961
chr10	59892775	59894759
chr10	59895434	59899295
chr10	60023618	60031637
chr10	60107588	60113220
chr10	60142858	60146100
chr10	60410119	60413147
chr10	60722442	60725726
chr10	60936402	60939001
chr10	61095417	61098274
chr10	61120768	61125187
chr10	61665693	61669286
chr10	62146906	62152428
chr10	62329785	62334989
chr10	63381464	63384551
chr10	63657433	63665294
chr10	63733108	63736131
chr10	63804208	63811980
chr10	63840575	63844893
chr10	64129338	64132042
chr10	64919353	64923282
chr10	64926488	64930090
chr10	64964211	64971574
chr10	64976358	64980929
chr10	65024597	65031033
chr10	65174578	65178888
chr10	65225896	65229400
chr10	65330602	65334590
chr10	65362662	65366667
chr10	65372951	65375433
chr10	65386721	65392511
chr10	65470147	65475161
chr10	65676170	65678045
chr10	66308056	66312543
chr10	67418816	67421078
chr10	68482505	68485358
chr10	68580287	68584612
chr10	68595938	68599597
chr10	68651022	68654710
chr10	68684893	68690695
chr10	68699553	68702673
chr10	69000861	69003504
chr10	69913017	69914816
chr10	70102420	70107169
chr10	70321186	70324441
chr10	70359971	70362269
chr10	70572959	70574873
chr10	72140283	72143873
chr10	72189514	72193263
chr10	72220993	72223895
chr10	72355880	72357795
chr10	73598495	73602525
chr10	73618937	73621374
chr10	73738893	73742599
chr10	73745219	73748426
chr10	73755067	73757738
chr10	73793311	73795722
chr10	73803201	73806658
chr10	73883309	73886465
chr10	73917356	73919778
chr10	74001718	74005120
chr10	74018476	74022204
chr10	74184059	74186103
chr10	74370062	74373427
chr10	74452401	74455342
chr10	74541637	74546849
chr10	74853631	74857861
chr10	75312254	75317171
chr10	75340525	75343172
chr10	75487894	75491352
chr10	75910557	75913941
chr10	75933738	75937981
chr10	76176128	76180312
chr10	76211266	76215753
chr10	76217791	76222400
chr10	76683385	76689701
chr10	76690253	76693831
chr10	76871405	76874495
chr10	77416472	77418762
chr10	78156800	78159855
chr10	79037256	79040469
chr10	79044959	79048527
chr10	79368234	79371486
chr10	79372395	79374500
chr10	79421013	79425146
chr10	79801841	79805738
chr10	79935076	79938213
chr10	80115538	80118112
chr10	80732540	80735553
chr10	80818888	80822376
chr10	80951408	80955454
chr10	81423112	81426994
chr10	81569859	81572026
chr10	82221619	82226352
chr10	83636121	83640273
chr10	83666577	83671345
chr10	86003539	86005093
chr10	86067310	86069851
chr10	86088567	86092395
chr10	86117163	86121431
chr10	86182097	86185944
chr10	86970175	86973211
chr10	87077795	87080310
chr10	87333721	87335889
chr10	87678845	87681952
chr10	87847337	87849722
chr10	87941366	87944501
chr10	88021539	88026407
chr10	88516807	88519411
chr10	88553653	88556367
chr10	88622935	88629158
chr10	88851605	88854720
chr10	88963124	88965920
chr10	89101548	89104915
chr10	89262158	89265064
chr10	89416138	89419559
chr10	89429514	89433904
chr10	89576547	89579885
chr10	89623639	89629123
chr10	90638499	90642846
chr10	91060632	91063995
chr10	91087200	91089429
chr10	91133142	91134945
chr10	91402704	91404970
chr10	91846365	91849820
chr10	92780363	92786042
chr10	93099280	93101713
chr10	93355677	93359009
chr10	93391418	93394414
chr10	93638046	93640567
chr10	93645818	93648556
chr10	93999870	94003887
chr10	94331155	94335646
chr10	94608553	94610859
chr10	95105263	95107185
chr10	95699936	95703174
chr10	95750095	95753355
chr10	96166514	96170626
chr10	96304337	96307327
chr10	97134443	97137087
chr10	97308522	97311044
chr10	97413008	97414930
chr10	97500632	97504098
chr10	97514234	97517396
chr10	97571562	97576059
chr10	97666155	97668588
chr10	97888977	97892009
chr10	98273339	98276621
chr10	98593154	98595519
chr10	98743516	98747139
chr10	98882844	98884659
chr10	98886594	98889612
chr10	98890494	98893091
chr10	98898291	98901565
chr10	98939134	98944933
chr10	98959711	98961509
chr10	99029361	99031889
chr10	99050235	99052851
chr10	99081088	99082559
chr10	99253001	99255827
chr10	99477532	99480358
chr10	99821486	99823548
chr10	100005130	100008259
chr10	100124990	100129796
chr10	101380163	101383174
chr10	101735009	101738496
chr10	101767324	101769472
chr10	102122632	102125746
chr10	102131736	102135277
chr10	102670843	102673704
chr10	102790883	102794726
chr10	102800658	102805440
chr10	103053774	103055845
chr10	103113064	103115738
chr10	103203109	103206661
chr10	103224769	103227693
chr10	103242859	103250034
chr10	103252145	103255926
chr10	103599921	103602995
chr10	103646146	103650610
chr10	103693372	103695842
chr10	104005764	104009141
chr10	104038177	104041475
chr10	104100240	104102105
chr10	104432863	104437985
chr10	104534694	104538196
chr10	104870105	104872952
chr10	104911731	104915309
chr10	105692335	105694660
chr10	105728835	105731276
chr10	106366446	106370729
chr10	106415181	106418157
chr10	106424727	106427572
chr10	106492844	106496273
chr10	106525125	106527190
chr10	106746647	106750955
chr10	106950837	106953474
chr10	107364289	107366658
chr10	107455874	107462856
chr10	107501510	107503719
chr10	107529580	107534027
chr10	107595891	107598807
chr10	107600835	107605323
chr10	107731726	107736982
chr10	107940944	107944274
chr10	108040243	108042481
chr10	108270915	108274500
chr10	108341589	108343426
chr10	108377259	108380281
chr10	111762105	111768358
chr10	111790216	111795593
chr10	111833498	111838232
chr10	112026901	112031712
chr10	112255552	112257722
chr10	112551264	112555639
chr10	112630717	112634401
chr10	112676710	112682070
chr10	113514701	113518318
chr10	113525137	113528152
chr10	114046662	114049209
chr10	114290797	114296841
chr10	114321704	114325690
chr10	114342218	114347769
chr10	114396515	114399597
chr10	114429041	114431394
chr10	114436269	114440473
chr10	114490544	114493856
chr10	114513788	114517484
chr10	114533363	114538119
chr10	114542277	114546538
chr10	114551870	114554688
chr10	114707248	114710268
chr10	114717570	114719973
chr10	114759578	114764029
chr10	114786120	114788505
chr10	114815240	114820273
chr10	114873650	114877685
chr10	114891302	114894897
chr10	114909226	114911908
chr10	114935920	114940125
chr10	114944699	114948136
chr10	115032185	115035850
chr10	115781242	115783914
chr10	115790551	115794526
chr10	115805697	115810035
chr10	116309505	116311820
chr10	116832694	116834700
chr10	116854036	116857409
chr10	117890974	117894768
chr10	117923531	117925165
chr10	117974391	117976581
chr10	118013101	118016479
chr10	118018139	118021428
chr10	118032470	118035763
chr10	118036645	118039614
chr10	118496600	118499054
chr10	118591459	118596393
chr10	118649949	118653559
chr10	118719491	118722506
chr10	118730932	118735231
chr10	119207095	119209948
chr10	120427902	120429941
chr10	120789846	120792540
chr10	120967256	120969999
chr10	121485402	121488673
chr10	121589954	121594307
chr10	122216709	122219964
chr10	122403634	122407840
chr10	122448215	122450051
chr10	122488389	122490697
chr10	122491049	122495222
chr10	123095939	123097619
chr10	123256501	123258558
chr10	123260475	123264294
chr10	123282271	123285972
chr10	123354546	123357009
chr10	123357945	123361436
chr10	123637233	123641145
chr10	123685505	123688097
chr10	123912835	123915478
chr10	123923329	123926465
chr10	123947753	123953210
chr10	124637216	124640881
chr10	126103789	126106922
chr10	126336718	126339336
chr10	126764808	126766661
chr10	127797259	127800974
chr10	127843727	127845307
chr10	128077955	128081278
chr10	128968473	128970089
chr10	129111912	129114024
chr10	129794194	129799697
chr10	129984406	129986993
chr10	130323476	130327887
chr10	130488581	130490725
chr10	133996337	133998596
chr10	135460534	135464061
chr11	2695607	2699423
chr11	3020873	3023522
chr11	4065230	4067585
chr11	6596604	6599624
chr11	7597110	7600872
chr11	8303350	8307264
chr11	8691453	8694325
chr11	8829717	8833517
chr11	9049118	9051098
chr11	9253154	9255441
chr11	9481003	9484298
chr11	9589636	9591268
chr11	9712738	9715600
chr11	9720386	9724855
chr11	9925661	9928981
chr11	10322353	10327771
chr11	10816097	10821131
chr11	10830038	10833250
chr11	10879244	10881892
chr11	10897033	10899357
chr11	10920628	10923244
chr11	11200056	11201805
chr11	11232228	11234623
chr11	11826977	11830292
chr11	11861984	11867734
chr11	12697208	12703261
chr11	12711567	12717796
chr11	12847435	12851334
chr11	12861672	12866037
chr11	12866635	12869424
chr11	12881674	12888926
chr11	12934730	12936812
chr11	13018375	13022291
chr11	13118498	13120713
chr11	13121720	13125274
chr11	13155387	13158532
chr11	13161332	13163481
chr11	13699997	13703195
chr11	13986141	13989158
chr11	14233414	14235598
chr11	14521070	14523932
chr11	14562342	14565249
chr11	14608085	14609729
chr11	14666120	14669294
chr11	15473339	15477314
chr11	15583387	15588005
chr11	15661260	15663231
chr11	15849445	15854003
chr11	15863376	15866995
chr11	15988638	15993957
chr11	16022944	16029050
chr11	16101329	16108906
chr11	16138907	16141758
chr11	16168927	16173952
chr11	16211889	16218579
chr11	16246930	16249632
chr11	16259811	16264062
chr11	16374647	16382035
chr11	16386098	16390065
chr11	16632408	16637769
chr11	16728068	16730717
chr11	17170970	17173858
chr11	17371966	17377192
chr11	19139144	19141005
chr11	19366552	19376952
chr11	19446318	19450467
chr11	19485745	19488971
chr11	19495373	19497792
chr11	19532317	19534749
chr11	19670076	19672789
chr11	19731371	19735061
chr11	19852787	19854731
chr11	20021041	20023281
chr11	21805995	21808394
chr11	22475031	22477403
chr11	22483427	22486569
chr11	24515788	24521853
chr11	25881764	25884124
chr11	26351545	26354813
chr11	26531727	26533858
chr11	26672114	26675337
chr11	26773307	26777726
chr11	26869213	26872395
chr11	26978329	26980649
chr11	27032097	27035765
chr11	27443090	27446214
chr11	27464608	27467802
chr11	27489057	27493027
chr11	29585122	29587440
chr11	29802664	29806206
chr11	30501266	30505017
chr11	30509118	30511699
chr11	30585368	30590636
chr11	30603927	30607590
chr11	30614134	30618794
chr11	30731046	30733692
chr11	31530542	31533644
chr11	31784258	31787261
chr11	32497861	32501852
chr11	32911773	32914116
chr11	33037088	33040026
chr11	33279428	33282871
chr11	33496186	33498947
chr11	33711745	33715769
chr11	33721971	33725538
chr11	34122521	34127963
chr11	34209792	34211848
chr11	34287498	34290586
chr11	34320284	34324247
chr11	34337593	34339258
chr11	34351336	34357400
chr11	34652620	34655704
chr11	34675436	34678560
chr11	35435481	35439832
chr11	35446065	35450353
chr11	35495651	35503147
chr11	35682190	35684843
chr11	35939773	35942670
chr11	35970653	35976523
chr11	36231356	36235895
chr11	37368682	37371162
chr11	37524012	37527661
chr11	37631612	37635703
chr11	38619092	38621919
chr11	40189254	40192851
chr11	40207281	40210972
chr11	40222373	40226170
chr11	40291748	40294620
chr11	40300292	40304746
chr11	40309031	40314664
chr11	41210592	41212363
chr11	41301336	41304345
chr11	41327498	41330536
chr11	41475508	41483795
chr11	43289469	43291974
chr11	43701762	43704365
chr11	43756786	43759132
chr11	43924513	43928182
chr11	44053987	44057660
chr11	44983230	44986933
chr11	46014174	46020086
chr11	46138857	46141826
chr11	46927477	46929812
chr11	46996457	47001220
chr11	47024239	47027868
chr11	47122893	47129996
chr11	47207967	47211431
chr11	47487369	47491488
chr11	48055240	48058899
chr11	48100690	48103952
chr11	48456978	48460104
chr11	48876887	48885904
chr11	50685738	50691055
chr11	50696627	50702106
chr11	50710217	50730552
chr11	50743442	50747730
chr11	50759771	50764865
chr11	51509535	51512584
chr11	55007925	55013344
chr11	55815510	55818683
chr11	57528628	57532911
chr11	57544712	57547838
chr11	58670882	58673207
chr11	58909271	58914001
chr11	59315987	59319091
chr11	61584123	61586549
chr11	61600016	61603051
chr11	61828440	61830276
chr11	62358185	62360607
chr11	62514666	62516217
chr11	62606821	62610504
chr11	63446701	63451925
chr11	63503118	63506840
chr11	63888088	63890977
chr11	63898506	63901443
chr11	63952154	63953885
chr11	64037068	64040531
chr11	64071482	64073049
chr11	64453950	64457947
chr11	64641452	64648907
chr11	64684414	64686591
chr11	64794345	64796309
chr11	64867463	64871392
chr11	64901775	64904323
chr11	65100915	65103914
chr11	65118031	65122322
chr11	65186109	65188552
chr11	65195314	65199847
chr11	65248684	65250621
chr11	65254039	65256742
chr11	65258499	65261010
chr11	65262814	65278573
chr11	65325720	65329521
chr11	65335768	65338313
chr11	65381574	65383517
chr11	65624993	65628285
chr11	65655220	65658896
chr11	65756134	65757195
chr11	65818002	65819925
chr11	65850217	65852590
chr11	65916701	65919797
chr11	65925209	65929562
chr11	66056346	66058785
chr11	66078529	66080927
chr11	66361672	66363751
chr11	66404825	66406572
chr11	66442323	66446789
chr11	66649370	66651947
chr11	66679483	66681364
chr11	66682451	66684707
chr11	66725452	66727540
chr11	66887338	66890156
chr11	67005135	67009827
chr11	67418587	67420539
chr11	67651099	67654441
chr11	67857315	67860493
chr11	67864884	67868661
chr11	67884072	67888977
chr11	67976229	67980399
chr11	68094603	68096322
chr11	68140426	68142717
chr11	68235476	68238630
chr11	68605606	68609097
chr11	68842003	68843804
chr11	68978200	68980305
chr11	69063772	69066039
chr11	69078918	69081673
chr11	69231097	69233412
chr11	69257037	69259385
chr11	69453136	69456453
chr11	69465883	69471226
chr11	69513849	69516144
chr11	70146777	70149589
chr11	70455680	70457999
chr11	70672236	70674118
chr11	71119267	71121608
chr11	71160068	71164392
chr11	71750843	71754425
chr11	71759317	71762056
chr11	71795037	71799137
chr11	71822580	71824467
chr11	72121153	72123746
chr11	72469659	72472024
chr11	72523411	72526970
chr11	72544861	72548550
chr11	72729002	72732258
chr11	72782910	72787055
chr11	72849600	72853216
chr11	72963256	72966598
chr11	72976610	72978536
chr11	73124628	73128165
chr11	73149088	73153715
chr11	73189703	73192254
chr11	73220843	73224464
chr11	73242194	73245563
chr11	73425889	73431351
chr11	73468422	73471267
chr11	73489551	73491915
chr11	73564955	73568768
chr11	73586110	73588538
chr11	73780543	73785455
chr11	73879222	73884702
chr11	74031811	74038904
chr11	74458507	74460257
chr11	74695319	74698669
chr11	75014580	75017087
chr11	75038841	75042191
chr11	75050225	75054893
chr11	75349502	75351721
chr11	75523974	75529597
chr11	75654298	75661590
chr11	76099112	76103923
chr11	76118401	76122518
chr11	76546980	76551154
chr11	76600935	76605179
[truncated: 12,546 more rows]

## Sheet: DIPG13 H3K4me2
Chromosome	Start position	End position
chr1	27070	30857
chr1	947589	950486
chr1	2160289	2163943
chr1	6451450	6454792
chr1	6660231	6664079
chr1	6843038	6845549
chr1	6928138	6931515
chr1	8020044	8023121
chr1	8076639	8079795
chr1	8082217	8086957
chr1	8480133	8483815
chr1	8585746	8587838
chr1	8739092	8743689
chr1	8760126	8765702
chr1	8873949	8879318
chr1	8948650	8951316
chr1	9880780	9883546
chr1	10092087	10095917
chr1	10238164	10241311
chr1	10271107	10273978
chr1	11967621	11970405
chr1	14026891	14031115
chr1	14075714	14079737
chr1	14923504	14930170
chr1	14953388	14955395
chr1	15597265	15601258
chr1	15710211	15713554
chr1	15849321	15854584
chr1	15942735	15945855
chr1	16159273	16163363
chr1	16169684	16172496
chr1	16174950	16179336
chr1	16211153	16213441
chr1	16676270	16679525
chr1	16838701	16842248
chr1	16937169	16942785
chr1	16991999	16994934
chr1	17065215	17069402
chr1	17220612	17225950
chr1	17228769	17233028
chr1	19226519	19230616
chr1	19534794	19538753
chr1	19731588	19733099
chr1	19921899	19925733
chr1	21443353	21445087
chr1	21475195	21477651
chr1	21499894	21502763
chr1	22107514	22110544
chr1	22350180	22353329
chr1	22416148	22418165
chr1	23344174	23349003
chr1	23665828	23670484
chr1	23692939	23698369
chr1	23854839	23858897
chr1	23880952	23889909
chr1	24284722	24289855
chr1	24302043	24307715
chr1	24741524	24746539
chr1	25662104	25667888
chr1	25758101	25763112
chr1	26252435	26255077
chr1	26323053	26325617
chr1	26347916	26352769
chr1	26360612	26363284
chr1	26560102	26564185
chr1	27016679	27022286
chr1	27024374	27028504
chr1	27048821	27051904
chr1	27478426	27482327
chr1	27814251	27817366
chr1	27997150	28000179
chr1	28051122	28054211
chr1	28098313	28101833
chr1	28411177	28415854
chr1	28561551	28564645
chr1	28572149	28576700
chr1	28967258	28971520
chr1	31534477	31539596
chr1	31768258	31773659
chr1	32537405	32539849
chr1	32929549	32932387
chr1	33115538	33118257
chr1	33280578	33285741
chr1	33810247	33815312
chr1	33828115	33830947
chr1	33847139	33850432
chr1	33935490	33939135
chr1	34628220	34634204
chr1	35495797	35498296
chr1	35834462	35836507
chr1	36101858	36106899
chr1	36233649	36236413
chr1	36395109	36402806
chr1	36614123	36617764
chr1	36688487	36691852
chr1	36849723	36853295
chr1	37453538	37456012
chr1	37499081	37505117
chr1	37980111	37981659
chr1	38059674	38062708
chr1	38154664	38159380
chr1	39325218	39327580
chr1	39569454	39575102
chr1	39669671	39672899
chr1	39863520	39865084
chr1	40345685	40349674
chr1	40626120	40631177
chr1	40721827	40724560
chr1	40838233	40841739
chr1	40914396	40918624
chr1	40973569	40976523
chr1	40996161	40999200
chr1	41155334	41160530
chr1	41173516	41178332
chr1	41703570	41707377
chr1	42382889	42385642
chr1	42797241	42800699
chr1	42927609	42930479
chr1	43145200	43148296
chr1	43148811	43152874
chr1	43229598	43235092
chr1	43310684	43314803
chr1	43388311	43391274
chr1	44114862	44118605
chr1	44172059	44174615
chr1	44410735	44414633
chr1	45475897	45479148
chr1	45667817	45671549
chr1	45955244	45958105
chr1	46015346	46018491
chr1	46149782	46155282
chr1	46267689	46271893
chr1	46328602	46332631
chr1	46592916	46601459
chr1	46667796	46670806
chr1	46765956	46771254
chr1	46804324	46807342
chr1	47777553	47780534
chr1	48930079	48937673
chr1	48989910	48992825
chr1	49238536	49242301
chr1	50512210	50516005
chr1	50568706	50573643
chr1	50574457	50581769
chr1	51318062	51320373
chr1	51432055	51450022
chr1	51702199	51705033
chr1	51884215	51889679
chr1	51981273	51985144
chr1	52080906	52086268
chr1	52199575	52203206
chr1	52340415	52345591
chr1	52519083	52525806
chr1	52606430	52611643
chr1	52867550	52871855
chr1	53015199	53018882
chr1	53190681	53195730
chr1	53307285	53311971
chr1	53479782	53483199
chr1	54302169	54305473
chr1	54516662	54521750
chr1	54664388	54667719
chr1	54952126	54956195
chr1	55228657	55231519
chr1	55349412	55354699
chr1	55674336	55680606
chr1	57040321	57046554
chr1	57680489	57681922
chr1	57885361	57889767
chr1	58712970	58716449
chr1	59009310	59013246
chr1	59248506	59252136
chr1	59339450	59341560
chr1	61328967	61334822
chr1	61541817	61548036
chr1	61549419	61554816
chr1	61648397	61651713
chr1	61691270	61694949
chr1	61705637	61710721
chr1	61802506	61805263
chr1	61917840	61919750
chr1	62188453	62191988
chr1	62317686	62319902
chr1	62900933	62906504
chr1	63152659	63156602
chr1	63249015	63253522
chr1	63985113	63991949
chr1	64936207	64939810
chr1	65210961	65213956
chr1	65429235	65432378
chr1	65529465	65535857
chr1	65612333	65617063
chr1	65719600	65725094
chr1	65729568	65732622
chr1	65774093	65777090
chr1	65884517	65888799
chr1	66456673	66467534
chr1	66743352	66745145
chr1	66816056	66821121
chr1	66997910	67005228
chr1	67388423	67401096
chr1	67516900	67521409
chr1	67891408	67895794
chr1	68151705	68155183
chr1	68200896	68203605
chr1	68257415	68259979
chr1	68294862	68299332
chr1	68693324	68699894
chr1	68778585	68781102
chr1	68959995	68964345
chr1	70668028	70673533
chr1	70685770	70690190
chr1	70816862	70821151
chr1	70875370	70879350
chr1	71544169	71548485
chr1	72744405	72752517
chr1	74662596	74666207
chr1	74821343	74824740
chr1	74969175	74972675
chr1	75196400	75200987
chr1	76078579	76082699
chr1	76189017	76193325
chr1	76250710	76255994
chr1	77331058	77335135
chr1	77682238	77686994
chr1	78142901	78148727
chr1	78221999	78226270
chr1	78353301	78356729
chr1	78440149	78448360
chr1	78468127	78475363
chr1	79084637	79087361
chr1	79114605	79118785
chr1	81943120	81944992
chr1	82264581	82276573
chr1	82538145	82540294
chr1	83528552	83531733
chr1	84158099	84160897
chr1	84461499	84467089
chr1	84540577	84547627
chr1	84628469	84636643
chr1	84762861	84771117
chr1	84944416	84947865
chr1	84968274	84973692
chr1	85038546	85041332
chr1	85153251	85157749
chr1	85739948	85743478
chr1	85871411	85874556
chr1	85926865	85932343
chr1	86171367	86175393
chr1	86858825	86863791
chr1	87168937	87174391
chr1	87377491	87384244
chr1	87599664	87602363
chr1	87619742	87622240
chr1	87794325	87802528
chr1	88149624	88151890
chr1	88798060	88800133
chr1	89148059	89153767
chr1	89195913	89198173
chr1	89354172	89358484
chr1	89454424	89460010
chr1	89534646	89537282
chr1	89988379	89994666
chr1	90096785	90101872
chr1	90226911	90229989
chr1	90296635	90301058
chr1	90307079	90311181
chr1	90459900	90465421
chr1	91483481	91488728
chr1	91867046	91871683
chr1	91965229	91969912
chr1	92349537	92352838
chr1	92762119	92768021
chr1	93248733	93251328
chr1	93341288	93344093
chr1	93543494	93548548
chr1	93642408	93650287
chr1	93809407	93817617
chr1	93912147	93916583
chr1	94309410	94312520
chr1	94343464	94345947
chr1	94372463	94376254
chr1	94882101	94887729
chr1	95330582	95333491
chr1	95338439	95340752
chr1	95389689	95396140
chr1	95536910	95539567
chr1	97186144	97189939
chr1	98382726	98389051
chr1	98510149	98523917
chr1	98867739	98871822
chr1	99022237	99024465
chr1	99125289	99130308
chr1	99439903	99442330
chr1	99466929	99473009
chr1	100314704	100318877
chr1	100433586	100437386
chr1	100500039	100507594
chr1	100596238	100601560
chr1	100713907	100717411
chr1	100730239	100733686
chr1	100815922	100822041
chr1	101357606	101365028
chr1	101489787	101494139
chr1	101700453	101704631
chr1	102460399	102463672
chr1	103565018	103577081
chr1	103860246	103863629
chr1	104000234	104004310
chr1	104068295	104072253
chr1	107651954	107653654
chr1	107681570	107685661
chr1	108478417	108480861
chr1	108504391	108507850
chr1	108740839	108744604
chr1	108815989	108820199
chr1	108959207	108963761
chr1	109102947	109106984
chr1	109232951	109239230
chr1	109356957	109360239
chr1	109418437	109424499
chr1	109582447	109585545
chr1	109617118	109619372
chr1	109632539	109635550
chr1	109755456	109759453
chr1	109823776	109827358
chr1	109934783	109942289
chr1	109967536	109970903
chr1	110072022	110075177
chr1	110088372	110093280
chr1	110526522	110531141
chr1	110878858	110888169
chr1	111210573	111219111
chr1	111502489	111508165
chr1	111680466	111685717
chr1	111989730	111993699
chr1	112161520	112165804
chr1	112275700	112284332
chr1	112296590	112301476
chr1	112421954	112424638
chr1	112936196	112941935
chr1	113159410	113165685
chr1	113216209	113219607
chr1	113246603	113250876
chr1	113495161	113502065
chr1	113614394	113617432
chr1	113931006	113937892
chr1	114299694	114303221
chr1	114351342	114356104
chr1	114445648	114449310
chr1	114470132	114475563
chr1	115050380	115053471
chr1	115122683	115126055
chr1	115296969	115300384
chr1	115321556	115323770
chr1	117600885	117606037
chr1	117909582	117914518
chr1	118469306	118474671
chr1	119679938	119686129
chr1	119734976	119737329
chr1	120188288	120192106
chr1	120216783	120218999
chr1	120254067	120258581
chr1	120556097	120560309
chr1	120578341	120581541
chr1	120607493	120614965
chr1	120631258	120633585
chr1	120829683	120842530
chr1	120903742	120908923
chr1	142797112	142800599
chr1	142886767	142891410
chr1	143117812	143121329
chr1	143235877	143239544
chr1	143349519	143352530
chr1	143463166	143470602
chr1	143741867	143746204
chr1	143909794	143922161
chr1	144089514	144091802
chr1	144337869	144342011
chr1	144518518	144522330
chr1	144592567	144596426
chr1	144707102	144709740
chr1	144924733	144934558
chr1	144939917	144942938
chr1	144982257	144985266
chr1	145027270	145029713
chr1	145038305	145041464
chr1	145059050	145061176
chr1	145073384	145077157
chr1	145090288	145094077
chr1	145095755	145100264
chr1	145137985	145141614
chr1	145186448	145188627
chr1	145206708	145214282
chr1	145218353	145220085
chr1	145240014	145242602
chr1	145261339	145265278
chr1	145393548	145400365
chr1	145436289	145443555
chr1	145454496	145456938
chr1	145469028	145472632
chr1	145475597	145480829
chr1	145506001	145509812
chr1	145514601	145517739
chr1	145541856	145543879
chr1	145608529	145613457
chr1	145823705	145827976
chr1	146372991	146376361
chr1	146639645	146646480
chr1	146713196	146718998
chr1	147011023	147016247
chr1	147068862	147073556
chr1	147140136	147143374
chr1	147399979	147404099
chr1	147873413	147875792
chr1	147929735	147933542
chr1	148555184	148558732
chr1	149222492	149225619
chr1	149296503	149301243
chr1	149398464	149401656
chr1	149781137	149786365
chr1	149800890	149806770
chr1	149809405	149827413
chr1	149829287	149836532
chr1	149855551	149861726
chr1	149899010	149901048
chr1	149979559	149985350
chr1	150036994	150041694
chr1	150119242	150122137
chr1	150205031	150209771
chr1	150227662	150233023
chr1	150252622	150256491
chr1	150265313	150267540
chr1	150334665	150341064
chr1	150459278	150460829
chr1	150486984	150489837
chr1	150533222	150535259
chr1	150539524	150542425
chr1	150547437	150553470
chr1	150599769	150603383
chr1	150667947	150672003
chr1	150846350	150850210
chr1	150975436	150982701
chr1	151030060	151035847
chr1	151116949	151121009
chr1	151136508	151140184
chr1	151160653	151163048
chr1	151169802	151174226
chr1	151226486	151228816
chr1	151297573	151302049
chr1	151318069	151320905
chr1	151428872	151431067
chr1	151482491	151486327
chr1	151511478	151515559
chr1	151584860	151589605
chr1	151687488	151691123
chr1	151692808	151695626
chr1	151699475	151702577
chr1	151734663	151738147
chr1	151760685	151765820
chr1	153642130	153645426
chr1	153649687	153653513
chr1	153699603	153704094
chr1	153852231	153856305
chr1	153891483	153897134
chr1	153928803	153932026
chr1	153933692	153937506
chr1	153938203	153942122
chr1	153948369	153952217
chr1	153956541	153960491
chr1	153962416	153966291
chr1	154193992	154197393
chr1	154296877	154302105
chr1	154578794	154582422
chr1	154598614	154602037
chr1	154839506	154843178
chr1	154907952	154911470
chr1	154926442	154929631
chr1	154944681	154949699
chr1	154954829	154958220
chr1	154971124	154975143
chr1	155021552	155025576
chr1	155056361	155058776
chr1	155065906	155068107
chr1	155098865	155101973
chr1	155107071	155110008
chr1	155144118	155148439
chr1	155164145	155166737
chr1	155176615	155180284
chr1	155195419	155198512
chr1	155212210	155215554
chr1	155241946	155244029
chr1	155245766	155249383
chr1	155277754	155280819
chr1	155292823	155295208
chr1	155468559	155470803
chr1	155529168	155535046
chr1	155579175	155581526
chr1	155654644	155661362
chr1	155714409	155717303
chr1	155825587	155833003
chr1	155839909	155843693
chr1	155903180	155905390
chr1	155943628	155949818
chr1	155950717	155954343
chr1	156022416	156026548
chr1	156083538	156086829
chr1	156115318	156117196
chr1	156162193	156165340
chr1	156181665	156184652
chr1	156250102	156254077
chr1	156305091	156309536
chr1	156381693	156403262
chr1	156406004	156409226
chr1	156540488	156543018
chr1	156569186	156572406
chr1	156585546	156587094
chr1	156609510	156615881
chr1	156695148	156699924
chr1	156717068	156721084
chr1	156735225	156740258
chr1	156976283	156978218
chr1	157003091	157004614
chr1	157009390	157016721
chr1	157105647	157110450
chr1	157961469	157965708
chr1	158118386	158121932
chr1	158965980	158972536
chr1	159140749	159144976
chr1	159154492	159158840
chr1	159892991	159895998
chr1	159997075	160003995
chr1	160036888	160041874
chr1	160229107	160233365
chr1	160310336	160314667
chr1	160368868	160373182
chr1	160691718	160693295
chr1	161013950	161016854
chr1	161085674	161089870
chr1	161099228	161104475
chr1	161122732	161125921
chr1	161134622	161137729
chr1	161170493	161173727
chr1	161195153	161197826
chr1	161228028	161230772
chr1	161282662	161286132
chr1	161359301	161361180
chr1	161368475	161371027
chr1	161425736	161429479
chr1	161440462	161443807
chr1	161482293	161484540
chr1	161498558	161503612
chr1	161580037	161583167
chr1	161695206	161697994
chr1	161716716	161721977
chr1	161733507	161738087
chr1	162038066	162043262
chr1	162113587	162116922
chr1	162466234	162470566
chr1	162529889	162534422
chr1	162601949	162604277
chr1	162759383	162763154
chr1	163037684	163040967
chr1	163289839	163294663
chr1	164264695	164266930
chr1	164526690	164535159
chr1	164556246	164558992
chr1	164606157	164607872
chr1	165566612	165569257
chr1	165598441	165605343
chr1	165664495	165668864
chr1	165736829	165740115
chr1	165795682	165799829
chr1	165852358	165855084
chr1	166133525	166138034
chr1	166807286	166808824
chr1	166842400	166846834
chr1	166940936	166944624
chr1	167104748	167107238
chr1	167187388	167190333
chr1	167190906	167194392
chr1	167295990	167301205
chr1	167422808	167426934
chr1	167520834	167524360
chr1	167682352	167686886
chr1	167689642	167697076
chr1	167723759	167727390
chr1	167902737	167908833
chr1	168147310	168150359
chr1	168194146	168199385
chr1	168586850	168588683
chr1	169074474	169080451
chr1	169334786	169339504
chr1	169393856	169398627
chr1	169451706	169457045
chr1	169761939	169766665
chr1	169860056	169864978
chr1	170036089	170045264
chr1	170252665	170255617
chr1	170462086	170465430
chr1	170498526	170505068
chr1	170587385	170589577
chr1	170631397	170636185
chr1	170664176	170669851
chr1	171050095	171052419
chr1	171109980	171113155
chr1	171453157	171458419
chr1	171708680	171713360
chr1	171749498	171753133
chr1	171811210	171817400
chr1	171865847	171869724
chr1	172109295	172115940
chr1	172290133	172293087
chr1	172325642	172330719
chr1	172411342	172414143
chr1	172499135	172506302
chr1	173090685	173093419
chr1	173397389	173400777
chr1	173444451	173450026
chr1	173683075	173687131
chr1	173789823	173795240
chr1	173833758	173840552
chr1	173985839	173993336
chr1	174127012	174130804
chr1	174767522	174772838
chr1	174899870	174902162
chr1	174958373	174960614
chr1	174966993	174973095
chr1	174990333	174993533
chr1	175040341	175042956
chr1	175641695	175644889
chr1	175709661	175713276
chr1	176172437	176175891
chr1	177128793	177136394
chr1	177137837	177143338
chr1	178060905	178067566
chr1	178229546	178233371
chr1	178339666	178343135
chr1	178510986	178513292
chr1	178619633	178622184
chr1	178694552	178698748
chr1	178838457	178841070
chr1	178985316	178987641
chr1	178995220	178998691
chr1	179049779	179052711
chr1	179261257	179264938
chr1	179783312	179785710
chr1	179844413	179848212
chr1	179849301	179854573
chr1	179922680	179928400
chr1	180122348	180126472
chr1	180199241	180201742
chr1	180467834	180473628
chr1	180600423	180605563
chr1	180894090	180897881
chr1	180988966	180992930
chr1	181057344	181062590
chr1	181063184	181067037
chr1	181072833	181075270
chr1	181398727	181400560
chr1	182082384	182085054
chr1	182357382	182361953
chr1	182556087	182558957
chr1	182570563	182574456
chr1	182582729	182588944
chr1	182756849	182759842
chr1	182807882	182812766
chr1	182992614	182998121
chr1	183039389	183041686
chr1	183058692	183060656
chr1	183384450	183388231
chr1	183438226	183441545
chr1	183600558	183610368
chr1	183700573	183704919
chr1	183773239	183777314
chr1	183785255	183787867
chr1	183997809	184001127
chr1	184002091	184007809
chr1	184019348	184023824
chr1	184120675	184123408
chr1	184169923	184172003
chr1	184265429	184269503
chr1	184354702	184360824
chr1	184475496	184477786
chr1	184543223	184545281
chr1	184720428	184726867
chr1	184941441	184944017
chr1	185013227	185021249
chr1	185122709	185128820
chr1	185280416	185288840
chr1	186341376	186346996
chr1	186797232	186800693
chr1	187230065	187231706
chr1	187449812	187451866
chr1	189318513	189322134
chr1	190108816	190110816
chr1	190349246	190353978
chr1	190436397	190451268
chr1	192507577	192509815
chr1	192775869	192781124
chr1	193025012	193032974
chr1	193071686	193075618
chr1	193086969	193094423
chr1	193149763	193158119
chr1	194411085	194413369
chr1	196573324	196579629
chr1	196796236	196798890
chr1	197109368	197116858
chr1	197163985	197172706
chr1	197236510	197239763
chr1	197643051	197646692
chr1	197741760	197745910
chr1	198126190	198131499
chr1	198146038	198150242
chr1	198173422	198176166
chr1	198871269	198875386
chr1	198894345	198908052
chr1	200047359	200052310
chr1	200368967	200372055
chr1	200378645	200380426
chr1	200584513	200592066
chr1	200593419	200595447
chr1	200636651	200641417
chr1	200692394	200694317
chr1	200706733	200715619
chr1	200770646	200772801
chr1	200795451	200797980
chr1	200859275	200863800
chr1	200982571	200986189
chr1	201212623	201215398
chr1	201506556	201510402
chr1	201533911	201536143
chr1	201615655	201621832
chr1	201660867	201664075
chr1	201737720	201740447
chr1	201798441	201801429
chr1	201856436	201860197
chr1	201914029	201917162
chr1	202309460	202311723
chr1	202316943	202320390
chr1	202773066	202776660
chr1	202777094	202781431
chr1	202829569	202833257
chr1	202856213	202859453
chr1	202936381	202939269
chr1	202975247	202978563
chr1	203246425	203248758
chr1	203273250	203279093
chr1	203293485	203297448
chr1	203443822	203446319
chr1	203594685	203598548
chr1	203829045	203833207
chr1	204042418	204048327
chr1	204317578	204320889
chr1	204326345	204329552
chr1	204374765	204382232
chr1	204460764	204465467
chr1	204471796	204478278
chr1	204484892	204486670
chr1	204796517	204801175
chr1	205088713	205093284
chr1	205177981	205182122
chr1	205216262	205218658
chr1	205322800	205327401
chr1	205328574	205330587
chr1	205598832	205602852
chr1	205715590	205718995
chr1	205779811	205784062
chr1	206129011	206141838
chr1	206484243	206486374
chr1	206552409	206554661
chr1	206806837	206811750
chr1	206852765	206854590
chr1	206859002	206861493
chr1	207222294	207227267
chr1	207493872	207496981
chr1	207922116	207929040
chr1	208278467	208280821
chr1	208411468	208419452
chr1	208420547	208423383
chr1	208439759	208443098
chr1	209956151	209958809
chr1	210245234	210248989
chr1	211429751	211435074
chr1	211552830	211557596
chr1	211749250	211754579
chr1	211845329	211850702
chr1	211999802	212003613
chr1	212203864	212213873
chr1	212457521	212462931
chr1	212585566	212589716
chr1	212605370	212608227
chr1	212780736	212784289
chr1	212961499	212967243
chr1	213029352	213037028
chr1	213122809	213124995
chr1	213184932	213190736
chr1	213223490	213227567
chr1	213404443	213406652
chr1	214159745	214170429
chr1	214453270	214457545
chr1	214774858	214779239
chr1	215256377	215260152
chr1	215738609	215747410
chr1	216062510	216065584
chr1	216355767	216360626
chr1	216394171	216395727
chr1	216703497	216705623
chr1	217260720	217263988
chr1	217799506	217806105
chr1	218204083	218206513
chr1	218457088	218462715
chr1	218517154	218526110
chr1	218598916	218600590
chr1	219346034	219351275
chr1	219833553	219835907
chr1	220216747	220220542
chr1	220261704	220265059
chr1	220265644	220269828
chr1	220441186	220449199
chr1	220699446	220706185
chr1	221050812	221054319
chr1	221912789	221917976
chr1	222761237	222766099
chr1	222791397	222794003
chr1	222815981	222819153
chr1	222882816	222887987
chr1	222987311	222991751
chr1	223099586	223105552
chr1	223181911	223186624
chr1	223839041	223842054
chr1	223899077	223903466
chr1	224029915	224034822
chr1	224300995	224304737
chr1	224369926	224373367
chr1	224515210	224519693
chr1	224544185	224547514
chr1	224617647	224622098
chr1	224622368	224624620
chr1	224689806	224692191
chr1	224727324	224730600
chr1	224802597	224808429
chr1	225611585	225617602
chr1	225634673	225636731
chr1	225835139	225840751
chr1	225963946	225969315
chr1	226183810	226188260
chr1	226248181	226249892
chr1	226250854	226253681
chr1	226372286	226375372
chr1	226592965	226596342
chr1	226735145	226739939
chr1	226924395	226928503
chr1	227125993	227131434
chr1	227500739	227509168
chr1	228327115	228329883
chr1	228566211	228567391
chr1	228592150	228595877
chr1	228642068	228653916
chr1	228869703	228873544
chr1	229038245	229040047
chr1	229407016	229410622
chr1	229472399	229479953
chr1	229641468	229645265
chr1	229692101	229696146
chr1	229759286	229764678
chr1	229828650	229831120
chr1	230203489	230206094
chr1	230271636	230273960
chr1	230311530	230313961
chr1	230558484	230561674
chr1	230777772	230780678
chr1	230992241	230996395
chr1	231001515	231006062
chr1	231114412	231116651
chr1	231171650	231175974
chr1	231188112	231190748
chr1	231251949	231253454
chr1	231299591	231303104
chr1	231375030	231379101
chr1	231468120	231476532
chr1	231552031	231560208
chr1	231662597	231665802
chr1	231761392	231765681
chr1	231778085	231780278
chr1	232761857	232765715
chr1	233084413	233089346
chr1	233427704	233432544
chr1	233912385	233914275
chr1	234507130	234511298
chr1	234611428	234616558
chr1	234658051	234660732
chr1	234678989	234681834
chr1	234734345	234744900
chr1	234745814	234750782
chr1	234857709	234861413
chr1	234879018	234881069
chr1	235289041	235292888
chr1	235322982	235325851
chr1	235432034	235435047
chr1	235487220	235496365
chr1	235529248	235532511
chr1	235663879	235670420
chr1	235809002	235812892
chr1	236027398	236031853
chr1	236080177	236082362
chr1	236226487	236230435
chr1	236305785	236308972
chr1	236443437	236446683
chr1	236557233	236560207
chr1	236766065	236770362
chr1	236849754	236854565
chr1	236957058	236962547
chr1	237633521	237636424
chr1	237944620	237946598
chr1	238631351	238633656
chr1	239347579	239349118
chr1	239375016	239377520
chr1	239548192	239555419
chr1	239881752	239885576
chr1	240252753	240260691
chr1	240773229	240776544
chr1	241680224	241684765
chr1	241693907	241696344
chr1	241799539	241804776
chr1	242009835	242014450
chr1	242308876	242311437
chr1	242683594	242687996
chr1	243413436	243421799
chr1	243478442	243480778
chr1	243875722	243878641
chr1	243954426	243956565
chr1	244008783	244016414
chr1	244065334	244067740
chr1	244080336	244082820
chr1	244173759	244177265
chr1	244209702	244211887
chr1	244212651	244218145
chr1	244317445	244320011
chr1	244608474	244616730
chr1	244814914	244820241
chr1	244996359	245004122
chr1	245023223	245026675
chr1	245027302	245029583
chr1	245131840	245136698
chr1	245315653	245321409
chr1	245461502	245463153
chr1	245580312	245582445
chr1	245673276	245677629
chr1	245747566	245749632
chr1	246667556	246671277
chr1	246728120	246732885
chr1	246842940	246845276
chr1	246886260	246890811
chr1	247239651	247242779
chr1	247265102	247269004
chr1	247370980	247375454
chr1	247610587	247613033
chr1	249120041	249121683
chr1	249130930	249134165
chr1	249150515	249154480
chr1	249199297	249202446
chr10	177603	180965
chr10	704742	707405
chr10	708969	710934
chr10	1770091	1781319
chr10	3824366	3826835
chr10	4356995	4359791
chr10	5453490	5458464
chr10	5727078	5729844
chr10	5733032	5736805
chr10	5750849	5754883
chr10	5851268	5857176
chr10	7125768	7128484
chr10	7827801	7832722
chr10	10179985	10182307
chr10	11046632	11051339
chr10	11053458	11059971
chr10	11060626	11065812
chr10	11204592	11209741
chr10	11250368	11253048
chr10	11573229	11575960
chr10	11614532	11616655
chr10	11649625	11653412
chr10	11726316	11728396
chr10	12234843	12241190
chr10	13202348	13206275
chr10	13930572	13933879
chr10	14047337	14052992
chr10	14212639	14217272
chr10	14642278	14645975
chr10	14666519	14668560
chr10	14877930	14882680
chr10	14921290	14924477
chr10	15000148	15002592
chr10	15125414	15128300
chr10	15207552	15210754
chr10	15408980	15412591
chr10	15757895	15762807
chr10	15898650	15903216
chr10	16857430	16861528
chr10	17240717	17244573
chr10	17268763	17274803
chr10	17683760	17689124
chr10	18424085	18426069
chr10	18428089	18433139
chr10	18491099	18494169
chr10	18629065	18630642
chr10	18936616	18941757
chr10	18946554	18951754
chr10	19776836	19779360
chr10	20103434	20107954
chr10	21283837	21286135
chr10	21800188	21811344
chr10	21811794	21823339
chr10	22263297	22268422
chr10	22283362	22287268
chr10	22288580	22292190
chr10	22340458	22343348
chr10	22374725	22376764
chr10	22516641	22520365
chr10	22537840	22541466
chr10	22601615	22609434
chr10	22610949	22614474
chr10	22987496	22990569
chr10	22999353	23003378
chr10	23728940	23732367
chr10	24496312	24500069
chr10	25006960	25012308
chr10	25246614	25249039
chr10	25303107	25307287
chr10	25369995	25374053
chr10	25462889	25467252
chr10	25754154	25757202
chr10	26557384	26559263
chr10	27081002	27082871
chr10	27146316	27150624
chr10	27440863	27446702
chr10	27527403	27533609
chr10	28966845	28972811
chr10	29076729	29079063
chr10	29698024	29701682
chr10	30402746	30405345
chr10	30634894	30638974
chr10	30721924	30728292
chr10	31307286	31308836
chr10	31608969	31616019
chr10	32214118	32220973
chr10	32338996	32344630
chr10	32632750	32636086
chr10	32663329	32669345
chr10	32733524	32736984
chr10	33242456	33250198
chr10	34864784	34866920
chr10	35068719	35071921
chr10	35089109	35091862
chr10	35483659	35486154
chr10	35625953	35629369
chr10	35929857	35933458
chr10	38142641	38148253
chr10	38262593	38266691
chr10	38298498	38301783
chr10	42971492	42973815
chr10	43042586	43049599
chr10	43131867	43135165
chr10	43632003	43636661
chr10	44067727	44071056
chr10	44116713	44119898
chr10	46008559	46011873
chr10	46087330	46092271
chr10	49515220	49518380
chr10	49733479	49735274
chr10	50787415	50792228
chr10	51368432	51373425
chr10	51564481	51567701
chr10	51621526	51626082
chr10	52335898	52338476
chr10	52380471	52386851
chr10	53574240	53576800
chr10	55513312	55516360
chr10	56553382	56562202
chr10	56992039	56994202
chr10	57267411	57270597
chr10	57383994	57392133
chr10	58119639	58123628
chr10	58381113	58383886
chr10	60023307	60032128
chr10	60094020	60097596
chr10	60143361	60147714
chr10	60272674	60275694
chr10	60933546	60940745
chr10	61119593	61124811
chr10	61662871	61669221
chr10	62145687	62151202
chr10	62329847	62333843
chr10	62537124	62543708
chr10	62701579	62705284
chr10	63658804	63665340
chr10	63733508	63735798
chr10	63807616	63812040
chr10	63840950	63843862
chr10	64022706	64029923
chr10	64563793	64568815
chr10	64574036	64578494
chr10	64965841	64968900
chr10	65023681	65030201
chr10	65174323	65178575
chr10	65222252	65228771
chr10	65387273	65392464
chr10	65470214	65474153
chr10	65625074	65627260
chr10	68684608	68692868
chr10	68699573	68702345
chr10	69230076	69232663
chr10	69642891	69647107
chr10	69830762	69835974
chr10	70092269	70097605
chr10	70229200	70232192
chr10	70320596	70323837
chr10	70359477	70362986
chr10	70659228	70663045
chr10	70714795	70718165
chr10	70747794	70749980
chr10	70882315	70885837
chr10	70936953	70941994
chr10	71906117	71907738
chr10	71990362	71994308
chr10	72971321	72974429
chr10	73599270	73602330
chr10	73606982	73611451
chr10	73723731	73728627
chr10	73739905	73742328
chr10	73974543	73977846
chr10	74032011	74036982
chr10	74383563	74386891
chr10	74450791	74455498
chr10	74542763	74546244
chr10	74853221	74857990
chr10	75004677	75008238
chr10	75010940	75014359
chr10	75117571	75119653
chr10	75172099	75175164
chr10	75252520	75257053
chr10	75383357	75386580
chr10	75489129	75491484
chr10	75531291	75536268
chr10	75543865	75546830
chr10	75908771	75913959
chr10	75935075	75939579
chr10	76176763	76180328
chr10	76870753	76874772
chr10	76969379	76972435
chr10	77157673	77164077
chr10	79045938	79048273
chr10	79935906	79938056
chr10	80732247	80735297
chr10	81200907	81204986
chr10	81585819	81590775
chr10	83635412	83642556
chr10	86088339	86092185
chr10	86119202	86121483
chr10	86970631	86972243
chr10	87941428	87943291
chr10	88278173	88284244
chr10	88516788	88520029
chr10	88850260	88854707
chr10	88963106	88965307
chr10	89101864	89106377
chr10	89262498	89268915
chr10	89418320	89422407
chr10	89574138	89579842
chr10	89622878	89631368
chr10	90638754	90643177
chr10	90733832	90735869
chr10	91010194	91012192
chr10	91060628	91063690
chr10	91087073	91089097
chr10	91151401	91153786
chr10	91172613	91180098
chr10	91401012	91406590
chr10	91459025	91467484
chr10	92630381	92635041
chr10	92781892	92785139
chr10	93170040	93173369
chr10	93390911	93394742
chr10	93556393	93561355
chr10	93665859	93670197
chr10	93682488	93687031
chr10	93996911	94003845
chr10	94331033	94335836
chr10	94352130	94356887
chr10	94608494	94611081
chr10	94957638	94960097
chr10	95255198	95259331
chr10	95460630	95464642
chr10	95652188	95656843
chr10	96120838	96123496
chr10	96161776	96166734
chr10	96167479	96170152
chr10	96304067	96308580
chr10	97413286	97417159
chr10	97452387	97454693
chr10	97515108	97517545
chr10	97666259	97668348
chr10	97801979	97807247
chr10	97888453	97892741
chr10	98271692	98275428
chr10	98343682	98349218
chr10	98593132	98594915
chr10	98743895	98745959
chr10	98941171	98946024
chr10	99091508	99094005
chr10	99184608	99188731
chr10	99204417	99206547
chr10	99256110	99260814
chr10	101188319	101192380
chr10	101375880	101382862
chr10	101490559	101493817
chr10	101735258	101737666
chr10	101767022	101769836
chr10	101943260	101948080
chr10	102106470	102111788
chr10	102132214	102136984
chr10	102294139	102298412
chr10	102670991	102675648
chr10	102790119	102793617
chr10	102818120	102822179
chr10	103112838	103116219
chr10	103243867	103248921
chr10	103452356	103455157
chr10	103573477	103579905
chr10	103598461	103602740
chr10	103891774	103894760
chr10	104003955	104009025
chr10	104260716	104265737
chr10	104403781	104408110
chr10	104432754	104437117
chr10	104471392	104476463
chr10	104502410	104505863
chr10	104535119	104537735
chr10	104675487	104684251
chr10	104949961	104952835
chr10	105035622	105040104
chr10	105126962	105129292
chr10	105155077	105158517
chr10	105727352	105731871
chr10	105879877	105883780
chr10	106013760	106017134
chr10	106096430	106100192
chr10	106400147	106405616
chr10	106493460	106496671
chr10	107529484	107532409
chr10	107596830	107600078
chr10	111765154	111773036
chr10	111791114	111795470
chr10	111834929	111838265
chr10	112027591	112030940
chr10	112064478	112067231
chr10	112255315	112257696
chr10	112326259	112333031
chr10	112630827	112635552
chr10	112677003	112684388
chr10	113940452	113945314
chr10	114205357	114208664
chr10	114290721	114296933
chr10	114437297	114439462
chr10	114534029	114536833
chr10	114543299	114545633
chr10	114711508	114717302
chr10	114816663	114820695
chr10	114874431	114878180
chr10	115032075	115035064
chr10	115607996	115618631
chr10	115804852	115809075
chr10	115931562	115935571
chr10	116441799	116445014
chr10	116697479	116700730
chr10	116851403	116857376
chr10	117891443	117894319
chr10	118031111	118035656
chr10	119130682	119134924
chr10	119801444	119807796
chr10	120098585	120103318
chr10	120510946	120514076
chr10	120789841	120792353
chr10	120837271	120841545
chr10	120936968	120939090
chr10	120966823	120971189
chr10	121351395	121356048
chr10	121356151	121357781
chr10	121483783	121488705
chr10	121629071	121631859
chr10	122216592	122220336
chr10	122609562	122612744
chr10	123354008	123361131
chr10	123684924	123689087
chr10	123921617	123926843
chr10	123950473	123954577
chr10	124134788	124137613
chr10	124636046	124641172
chr10	124765582	124770877
chr10	126103679	126108507
chr10	126428392	126432490
chr10	126842096	126847640
chr10	127581996	127586891
chr10	128991854	128994800
chr10	129794751	129799999
chr10	129919738	129926424
chr10	130324258	130327617
chr10	134142182	134147100
chr10	135460367	135464147
chr11	206195	209693
chr11	2716725	2722679
chr11	3009042	3013298
chr11	4114901	4119495
chr11	6623163	6626905
chr11	7533708	7537247
chr11	7597193	7601212
chr11	8007080	8010878
chr11	8188632	8192104
chr11	8829676	8833441
chr11	8983945	8987166
chr11	9022433	9025850
chr11	9252021	9254856
chr11	9334120	9337558
chr11	9480773	9485817
chr11	9596009	9599424
chr11	10324921	10331007
chr11	10772083	10774864
chr11	10829925	10832817
chr11	10876986	10882138
chr11	11862166	11868889
chr11	12696711	12703039
chr11	12712839	12717318
chr11	12848245	12850606
chr11	12883337	12888436
chr11	13155788	13158848
chr11	13482261	13486193
chr11	13688308	13693273
chr11	14521190	14523521
chr11	14540926	14543016
chr11	14661035	14671306
chr11	16212710	16217272
chr11	16373539	16381064
chr11	16620264	16640866
chr11	16759080	16762074
chr11	17372191	17376895
chr11	18032783	18036188
chr11	18340744	18347057
chr11	18546731	18550138
chr11	18608715	18613526
chr11	18653584	18657037
chr11	19137972	19141518
chr11	19259719	19262967
chr11	19366053	19376991
chr11	19732444	19735637
chr11	20409303	20412147
chr11	22213531	22217440
chr11	22644813	22648671
chr11	22848784	22852251
chr11	24516540	24523154
chr11	24597773	24600732
chr11	26774148	26776185
chr11	27014430	27019590
chr11	27032553	27034855
chr11	27382268	27386148
chr11	27489140	27493992
chr11	27525519	27529573
chr11	27719758	27723882
chr11	28124365	28133638
chr11	30342905	30348166
chr11	30603577	30609176
chr11	30615737	30618257
chr11	31390122	31393774
chr11	31528879	31534295
chr11	31829454	31833243
chr11	32604785	32607517
chr11	32911995	32914378
chr11	33037104	33040519
chr11	33178880	33183934
chr11	33279624	33282825
chr11	33398135	33400376
chr11	33754670	33759719
chr11	34125377	34128827
chr11	34320186	34323359
chr11	34376084	34382078
chr11	34458811	34462419
chr11	34936233	34940964
chr11	35682117	35684929
chr11	35972707	35976444
chr11	36529156	36533195
chr11	36615093	36617980
chr11	40300499	40303969
chr11	40307063	40316089
chr11	41476766	41483547
chr11	43288967	43291422
chr11	43378870	43383646
chr11	43576791	43581022
chr11	43595679	43599153
chr11	43664148	43667959
chr11	43700869	43705682
chr11	43757432	43759456
chr11	44115907	44119249
chr11	45867813	45871085
chr11	46014432	46017176
chr11	46135533	46141506
chr11	46581142	46583546
chr11	46865319	46869294
chr11	46937382	46939627
chr11	46998200	46999693
chr11	47235351	47238537
chr11	47269710	47271329
chr11	47291949	47294392
chr11	47786208	47790617
chr11	48056649	48058587
chr11	55815552	55818416
chr11	57224556	57228194
chr11	57479059	57481483
chr11	57528730	57534472
chr11	57545002	57547556
chr11	58346889	58352165
chr11	58669525	58673944
chr11	58872651	58877345
chr11	58908517	58912677
chr11	59380981	59385116
chr11	60609709	60613658
chr11	60680534	60683990
chr11	61558352	61562739
chr11	61594186	61598486
chr11	61890193	61894364
chr11	62340180	62342550
chr11	62358010	62360220
chr11	62494457	62497947
chr11	62606114	62610754
chr11	63449317	63451839
chr11	63888182	63891136
chr11	63951854	63954049
chr11	64035905	64040129
chr11	64050900	64054774
chr11	64071659	64074118
chr11	64083775	64087200
chr11	64214898	64217096
chr11	64404799	64407194
chr11	64453936	64457028
chr11	64576394	64578806
chr11	64641629	64648806
chr11	64683026	64686269
chr11	64793591	64796273
chr11	64869216	64871237
chr11	64888611	64890881
chr11	64900949	64904178
chr11	65028359	65031582
chr11	65100772	65103517
chr11	65196069	65198869
chr11	65243671	65246331
chr11	65254011	65256540
chr11	65263565	65275584
chr11	65323904	65329100
chr11	65336120	65338913
chr11	65380566	65383585
chr11	65600232	65602724
chr11	65625304	65629412
chr11	65653755	65660952
chr11	65728211	65730943
chr11	65768624	65771171
chr11	65817864	65821038
chr11	66023917	66026553
chr11	66034157	66037579
chr11	66054924	66060401
chr11	66078657	66081502
chr11	66111299	66114031
chr11	66311192	66314274
chr11	66359989	66360990
chr11	66382923	66386998
chr11	66404413	66410899
chr11	66441029	66446787
chr11	66724662	66727514
chr11	66887193	66890110
chr11	67005541	67010756
chr11	67083969	67087645
chr11	67373675	67376037
chr11	67796575	67799379
chr11	67866178	67868148
chr11	67884124	67888358
chr11	67976524	67980397
chr11	68036142	68041076
chr11	68080254	68083542
chr11	68228578	68231673
chr11	68235955	68238597
chr11	68605747	68609052
chr11	68636712	68639169
chr11	68669527	68673274
chr11	69452951	69456543
chr11	70455598	70457531
chr11	71156826	71165608
chr11	71420554	71422178
chr11	71496595	71500224
chr11	71637750	71643118
chr11	71748440	71754388
chr11	71788648	71793242
chr11	71822335	71824859
chr11	72501437	72506476
chr11	72522721	72528354
chr11	72728715	72732043
chr11	72783414	72785875
chr11	72849521	72855273
chr11	73305758	73310866
chr11	73468327	73472933
chr11	73489377	73491422
chr11	73498056	73501270
chr11	73566863	73568268
chr11	73585538	73589767
chr11	73691842	73695317
chr11	73781015	73784542
chr11	73878748	73886205
chr11	74107643	74111126
chr11	74302379	74305910
chr11	74458560	74463251
chr11	74658952	74663618
chr11	75110113	75113095
chr11	75377620	75380345
chr11	75524394	75529742
chr11	75656653	75660706
chr11	75916926	75922858
chr11	75944466	75948866
chr11	76091788	76094475
chr11	76153578	76159006
chr11	76492772	76496746
chr11	76571647	76574996
chr11	76601996	76604676
chr11	76756688	76759131
chr11	76764228	76766273
chr11	77299446	77302670
chr11	77346806	77349700
chr11	77527651	77534235
chr11	77703682	77706988
chr11	77755711	77758429
chr11	77786018	77792067
chr11	77848728	77853286
chr11	77897813	77901711
chr11	78028029	78031190
chr11	78042566	78044426
chr11	78060341	78063240
chr11	78125195	78128510
chr11	78283200	78288035
chr11	78355919	78358177
chr11	78830175	78833394
chr11	79023083	79025107
chr11	79147237	79153115
chr11	81703756	81706198
chr11	82439376	82444265
chr11	82467507	82469934
chr11	82507302	82509332
chr11	82533831	82535740
chr11	82552342	82554227
chr11	82555756	82558215
chr11	82608081	82615819
chr11	82699876	82701919
chr11	82779155	82785520
chr11	82825681	82827447
chr11	82866956	82873075
chr11	82903025	82908841
chr11	82992481	82998345
chr11	83190463	83192853
chr11	83434184	83437510
chr11	83922022	83924740
chr11	84290825	84292826
chr11	84632322	84636137
chr11	85261822	85263915
chr11	85334945	85341920
chr11	85357711	85361766
chr11	85369808	85377483
chr11	85428182	85431606
chr11	85752235	85756849
chr11	85773814	85781658
chr11	85954172	85960336
chr11	86011499	86015885
chr11	86511396	86515484
chr11	86747053	86751539
chr11	88065960	88073723
chr11	88791964	88800691
chr11	89222838	89226023
chr11	89866462	89870864
chr11	89952326	89959234
chr11	91582443	91585276
chr11	91956012	91963059
chr11	91972047	91975063
chr11	92040859	92044438
chr11	92926681	92932936
chr11	93394325	93398559
chr11	93470242	93476344
chr11	93476889	93479970
chr11	93515500	93521748
chr11	93859826	93866184
chr11	94224328	94229396
chr11	94472542	94476398
chr11	94500504	94505762
chr11	94557266	94559096
chr11	94704658	94708432
chr11	94796665	94804937
chr11	94807474	94809397
chr11	94821795	94825500
chr11	94960750	94966226
chr11	94986100	94989826
chr11	95069441	95073487
chr11	95520679	95529141
chr11	95652288	95659737
chr11	95731920	95735317
chr11	95743765	95748421
chr11	95926694	95930569
chr11	95939925	95942341
chr11	95969321	95972426
chr11	95974307	95977560
chr11	95986975	95988007
chr11	96037907	96043713
chr11	96068134	96077295
chr11	96117975	96126491
chr11	96196544	96199461
chr11	98889643	98893403
chr11	98938842	98942047
chr11	99253645	99255888
chr11	100420914	100423591
chr11	100549683	100556042
chr11	100556845	100564012
chr11	100574216	100575703
chr11	100588733	100592558
chr11	100608713	100611736
chr11	100699753	100704821
chr11	100797047	100799202
chr11	100809844	100813903
chr11	101783745	101787645
chr11	101916694	101920285
chr11	102182890	102185345
chr11	102214306	102221114
chr11	102319123	102325502
chr11	102958907	102964131
chr11	102978872	102981892
chr11	104729046	104731879
chr11	105359356	105361433
chr11	105477374	105493105
chr11	105650944	105655384
chr11	105804516	105807648
chr11	105886588	105894405
chr11	105945930	105954668
chr11	105956149	105960686
chr11	106352972	106354535
chr11	106885088	106892957
chr11	107325738	107330892
chr11	107433160	107437630
chr11	107460546	107463834
chr11	107710321	107712342
chr11	107727021	107731231
chr11	107798163	107801669
chr11	107878777	107883655
chr11	107991575	107994570
chr11	108088816	108096992
chr11	108336603	108339454
chr11	108366588	108369991
chr11	108534656	108538928
chr11	108982157	108984757
chr11	109291650	109297485
chr11	109840915	109843774
chr11	109964216	109968192
chr11	109998367	110006263
chr11	110163076	110168669
chr11	110299272	110305053
chr11	110579292	110585417
chr11	111139186	111141261
chr11	111409610	111412743
chr11	111467725	111470279
chr11	111471934	111478340
chr11	111634597	111638787
chr11	111740717	111743640
chr11	111748609	111752127
chr11	111847605	111850448
chr11	111894489	111897428
chr11	111943429	111946554
chr11	111955452	111960251
chr11	112095730	112099572
chr11	112567376	112569764
chr11	112830671	112841306
chr11	112845143	112850001
chr11	112883709	112885885
chr11	112891661	112896172
chr11	113016799	113018749
chr11	113574668	113578449
chr11	113642311	113649844
chr11	113741980	113747510
chr11	113929032	113933634
chr11	113980978	113983552
chr11	114032331	114035792
chr11	114267964	114275301
chr11	114308414	114313236
chr11	115114391	115116734
chr11	115260136	115262948
chr11	115279354	115282418
chr11	115369120	115376960
chr11	115844976	115847262
chr11	116641650	116645548
chr11	116800005	116802877
chr11	116859527	116861784
chr11	116863146	116865728
chr11	116872573	116875226
chr11	116947061	116949498
chr11	116952751	116955988
chr11	116964711	116968698
chr11	117013903	117017134
chr11	117048343	117051622
chr11	117184919	117189016
chr11	117197898	117200602
chr11	117470024	117472998
chr11	117743865	117749151
chr11	118270672	118274171
chr11	118304027	118313673
chr11	118435352	118437436
chr11	118441716	118447078
chr11	118488321	118494618
chr11	118658266	118662886
chr11	118788838	118792571
chr11	118796463	118801731
chr11	118867056	118870445
chr11	118887088	118891723
chr11	118900217	118903079
chr11	118926235	118929449
chr11	118936960	118940570
chr11	118954979	118957383
chr11	118965517	118967196
chr11	118970472	118975140
chr11	118976843	118980179
chr11	118990910	118994146
chr11	119075295	119079470
chr11	119185602	119188863
chr11	119244788	119248394
chr11	119249999	119253450
chr11	119291033	119294615
chr11	120194958	120198541
chr11	120205238	120211902
chr11	120260812	120263690
chr11	120270025	120273907
chr11	120433465	120437675
chr11	120702512	120704967
chr11	120895226	120897650
chr11	121161967	121168407
chr11	121566486	121569424
chr11	121569707	121571787
chr11	121591969	121595436
chr11	121799191	121801719
chr11	121965045	121973513
chr11	122011637	122013282
chr11	122026535	122031114
chr11	122310346	122313120
chr11	122450606	122453282
chr11	122525311	122528412
chr11	122682235	122685461
chr11	122929593	122935545
chr11	123057821	123059875
chr11	123063434	123066473
chr11	123094419	123096311
chr11	123429362	123432919
chr11	123609536	123614910
chr11	123761593	123763946
chr11	124491462	124494821
chr11	124525292	124528756
chr11	124542168	124545733
chr11	124608716	124612715
chr11	124665698	124672267
chr11	124705532	124708182
chr11	124822472	124826561
chr11	124979426	124982781
chr11	125035038	125039919
chr11	125130940	125134280
chr11	125350652	125354151
chr11	125362655	125367857
chr11	125385706	125388575
chr11	125438334	125442038
chr11	125460950	125464829
chr11	125494395	125499029
chr11	125742247	125745533
chr11	125770949	125774422
chr11	126079702	126083987
chr11	126172442	126175266
chr11	126289432	126291770
chr11	126413539	126415322
chr11	126569944	126572458
chr11	126748178	126750033
chr11	126798604	126801230
chr11	126868162	126875067
chr11	128320644	128322359
chr11	128366544	128368835
chr11	128369417	128371653
chr11	128383946	128394085
chr11	128401272	128404239
chr11	128413008	128415407
chr11	128421741	128424938
chr11	128472475	128474908
chr11	129011637	129014847
chr11	129146436	129148734
chr11	129188696	129191442
chr11	129819965	129823100
chr11	129938573	129944183
chr11	130180873	130185913
chr11	130317567	130319680
chr11	130784902	130787465
chr11	131122426	131124174
chr11	131239644	131243984
chr11	131387119	131390092
chr11	131502955	131505268
chr11	131995405	131998093
chr11	133190200	133192312
chr11	133410455	133413088
chr11	133504586	133508183
chr11	133677150	133681488
chr11	133820068	133828489
chr11	133834065	133837228
chr11	133873430	133875689
chr11	133901698	133905953
chr11	133936351	133944411
chr11	133988419	133997185
chr11	134090825	134098863
chr11	134120855	134125202
chr11	134141913	134148063
chr11	134200156	134205256
chr12	72808	77025
chr12	494330	500131
chr12	509195	512900
chr12	858138	868519
chr12	1097137	1102826
chr12	1426970	1429531
chr12	1582475	1585171
chr12	1698628	1703428
chr12	1713877	1716196
chr12	1798464	1803106
chr12	2110812	2115224
chr12	2920732	2923457
chr12	2984275	2988553
chr12	2999093	3002461
chr12	3066273	3071340
chr12	3308042	3312909
chr12	3978886	3983610
chr12	3989718	3991959
chr12	4382206	4386891
chr12	4400796	4404104
chr12	4429234	4433539
chr12	4645553	4650608
chr12	4711594	4716016
chr12	4756382	4760964
chr12	5017230	5020429
chr12	6337628	6341175
chr12	6559545	6562444
chr12	6577317	6581431
chr12	6600833	6605601
chr12	6640548	6643998
chr12	6660900	6665621
chr12	6794747	6799910
chr12	6831764	6834500
chr12	6872293	6875654
chr12	6929970	6932591
chr12	6958342	6962992
chr12	7012560	7014917
chr12	7033138	7037169
chr12	7052448	7055099
chr12	7078150	7082128
chr12	7123605	7127608
chr12	7340954	7344332
chr12	7789879	7791670
chr12	8087434	8089670
chr12	8122357	8125590
chr12	8178250	8181140
chr12	8184281	8189225
chr12	8232343	8237864
chr12	8331237	8335023
chr12	8839457	8842478
chr12	9064248	9070070
chr12	9099035	9104812
chr12	9267587	9270045
chr12	9435101	9438889
chr12	9598274	9603373
chr12	9798331	9804408
chr12	10016555	10024144
chr12	10364421	10368528
chr12	10512669	10520182
chr12	10570019	10573798
chr12	10585595	10589527
chr12	10763428	10767655
chr12	10870762	10877458
chr12	10901769	10904173
chr12	11321054	11327455
chr12	11801061	11806748
chr12	11945779	11948447
chr12	11964439	11968242
chr12	12334553	12338322
chr12	12390303	12399318
chr12	12416024	12421360
chr12	12500889	12504426
chr12	12509329	12512821
chr12	12672403	12675533
chr12	12710687	12717598
chr12	12763810	12767654
chr12	12832064	12839589
chr12	12847629	12851660
chr12	12866440	12880936
chr12	13196352	13198929
chr12	13406911	13409528
chr12	14517663	14522154
chr12	14536071	14540277
chr12	14555084	14558299
chr12	14953638	14959502
chr12	15474181	15480264
chr12	15501769	15505099
chr12	15839970	15844533
chr12	15861214	15863751
chr12	15928188	15930987
chr12	15938307	15944159
chr12	15991002	15993424
chr12	16033332	16040951
chr12	16062480	16067144
chr12	16757190	16760612
chr12	18195282	18200725
chr12	18448269	18452211
chr12	19282968	19286103
chr12	19592375	19596066
chr12	19698638	19700535
chr12	20519735	20523922
chr12	21588990	21592621
chr12	21651692	21657250
chr12	21804437	21811237
chr12	22198348	22202523
chr12	22270112	22271704
chr12	22479880	22489554
chr12	22561043	22563486
chr12	22689340	22693095
chr12	22693840	22698191
chr12	22776391	22783660
chr12	22918239	22920913
chr12	23707440	23710572
chr12	23922161	23926138
chr12	23947218	23950902
chr12	24037385	24042216
chr12	24058901	24064980
chr12	24073252	24076063
chr12	24088723	24105907
chr12	24530744	24533201
chr12	24548020	24550519
chr12	24652313	24654723
chr12	24711054	24718157
chr12	24850039	24852541
chr12	24930858	24932504
chr12	25053400	25058697
chr12	25098325	25102789
chr12	25346430	25350047
chr12	25403634	25405783
chr12	25537280	25540809
chr12	26112044	26114847
chr12	26194649	26198355
chr12	26272979	26280975
chr12	26347606	26351221
chr12	26897583	26900638
chr12	26972681	26975739
chr12	26982198	26987069
chr12	27087217	27095020
chr12	27162874	27169658
chr12	27174309	27179378
chr12	27397115	27400693
chr12	27483859	27488264
chr12	27663857	27665811
chr12	27675852	27680917
chr12	27704654	27709841
chr12	27727369	27729443
chr12	27862242	27865660
chr12	27931470	27936975
chr12	28340381	28346412
chr12	29530674	29535270
chr12	29607118	29609321
chr12	29933939	29938288
chr12	30589675	30592197
chr12	30843797	30849950
chr12	30905089	30908936
chr12	31078476	31083011
chr12	31224862	31230035
chr12	31357434	31360271
chr12	31469188	31472833
chr12	31473389	31480534
chr12	31670812	31673448
chr12	31741011	31743159
chr12	31810762	31814387
chr12	31880850	31882984
chr12	32111265	32114966
chr12	32258765	32264451
chr12	32290857	32293933
chr12	32423086	32426719
chr12	32653720	32657095
chr12	32686632	32689548
chr12	32832592	32835182
chr12	32906208	32911192
chr12	34173605	34177620
chr12	38708771	38713579
chr12	39296961	39302280
chr12	39787054	39788867
chr12	39798475	39801757
[truncated: 8,713 more rows]

## Sheet: DIPG04 H3K4me2
Chromosome	Start position	End position
chr1	751389	754573
chr1	1658678	1660944
chr1	6660464	6664616
chr1	7358530	7361503
chr1	8077404	8089795
chr1	8105988	8109293
chr1	8156171	8158809
chr1	8480961	8483472
chr1	8584494	8587031
chr1	8719184	8722633
chr1	8738799	8742885
chr1	8760252	8764369
chr1	8770703	8773733
chr1	8875111	8877449
chr1	9260367	9263870
chr1	9746920	9751367
chr1	9881555	9884972
chr1	10092643	10095488
chr1	10588177	10591698
chr1	11861692	11869715
chr1	14812099	14814755
chr1	14925717	14929265
chr1	16158828	16163154
chr1	16175478	16179545
chr1	16837790	16842075
chr1	16937508	16941800
chr1	16969300	16972322
chr1	17098605	17100883
chr1	17228876	17232684
chr1	19534355	19538411
chr1	21500379	21502617
chr1	22107827	22111377
chr1	22350185	22352800
chr1	23424628	23430324
chr1	23666399	23670273
chr1	23693246	23697430
chr1	23881369	23884730
chr1	23902717	23905027
chr1	24103372	24107053
chr1	24284745	24288092
chr1	24741448	24744633
chr1	25095082	25098439
chr1	25758077	25763493
chr1	27018224	27022330
chr1	27023126	27027817
chr1	27478674	27482308
chr1	27995853	27999677
chr1	28411902	28415723
chr1	28572331	28576865
chr1	28763609	28767035
chr1	28968207	28971335
chr1	29298060	29301445
chr1	29303638	29305602
chr1	31535150	31538192
chr1	31768062	31771528
chr1	31843737	31848592
chr1	32399534	32401716
chr1	33114672	33118381
chr1	33426217	33429804
chr1	33453635	33455973
chr1	33810304	33814186
chr1	33891926	33897019
chr1	36102280	36108640
chr1	36233634	36236740
chr1	36396547	36400294
chr1	36849577	36853735
chr1	37940833	37945643
chr1	38154626	38158878
chr1	39325236	39327494
chr1	39337484	39340650
chr1	39569701	39575066
chr1	39656331	39659868
chr1	39669780	39673087
chr1	39731663	39736988
chr1	39872298	39878608
chr1	40838846	40841805
chr1	40996419	40998961
chr1	41155750	41160771
chr1	41173677	41178117
chr1	41444753	41447668
chr1	42382903	42386756
chr1	43148679	43152003
chr1	43229693	43232248
chr1	43310199	43312897
chr1	44114959	44118219
chr1	44298983	44302273
chr1	44410690	44413303
chr1	44513103	44516141
chr1	45272689	45276479
chr1	45411998	45414243
chr1	45667775	45671525
chr1	45964367	45967556
chr1	46048846	46053043
chr1	46149875	46154568
chr1	46328771	46331781
chr1	46593352	46599719
chr1	46804377	46807560
chr1	47495332	47498269
chr1	47778063	47780665
chr1	48934778	48936977
chr1	51247558	51250360
chr1	51434745	51443605
chr1	51444594	51451620
chr1	51702548	51706015
chr1	51977439	51984915
chr1	52081921	52085773
chr1	52200189	52204083
chr1	52340264	52344520
chr1	52519116	52523613
chr1	52604926	52609605
chr1	52868256	52871799
chr1	53016232	53018819
chr1	53479884	53482841
chr1	54197266	54205939
chr1	54231759	54234171
chr1	54302494	54305259
chr1	54516686	54520694
chr1	55676393	55680797
chr1	57040464	57046444
chr1	57109894	57113263
chr1	59245238	59250059
chr1	59760524	59763238
chr1	61327653	61337281
chr1	61521977	61524517
chr1	61541654	61547967
chr1	61549524	61562011
chr1	61566184	61571555
chr1	61584299	61588128
chr1	61596866	61599467
chr1	61604408	61609026
chr1	61622383	61625086
chr1	61635801	61639432
chr1	61667308	61670282
chr1	61685744	61689350
chr1	61692112	61694796
chr1	61718692	61721790
chr1	61739348	61746380
chr1	61782186	61785374
chr1	61802517	61805657
chr1	62902347	62906677
chr1	63153584	63156956
chr1	63249152	63252756
chr1	63987555	63991053
chr1	65004880	65007193
chr1	65211009	65214896
chr1	65398567	65401208
chr1	65467486	65469608
chr1	65533316	65535637
chr1	65719417	65722003
chr1	65729567	65734489
chr1	65884787	65889107
chr1	65894682	65897329
chr1	65991202	65994228
chr1	66257539	66262242
chr1	66264351	66268547
chr1	66276883	66280547
chr1	66457037	66461918
chr1	66766224	66767940
chr1	66796531	66801931
chr1	66997284	67004619
chr1	67028071	67030946
chr1	67234717	67237085
chr1	67390472	67394240
chr1	67396002	67401890
chr1	67446507	67448473
chr1	67516644	67520679
chr1	67891648	67894996
chr1	67895678	67900475
chr1	68147989	68152344
chr1	68213142	68217355
chr1	68257376	68260640
chr1	68295762	68298443
chr1	68638855	68640898
chr1	68661587	68665163
chr1	68693233	68699034
chr1	68848648	68851848
chr1	68960730	68964012
chr1	70405045	70407610
chr1	70668773	70673390
chr1	70875137	70879107
chr1	71544477	71547715
chr1	72747257	72751284
chr1	74662458	74665185
chr1	75196845	75201371
chr1	76188661	76194368
chr1	76253494	76257692
chr1	77683096	77686873
chr1	77901316	77905458
chr1	78222138	78226008
chr1	78297393	78299899
chr1	78353708	78357362
chr1	78390875	78393874
chr1	78440297	78447090
chr1	78467413	78477254
chr1	78955829	78958100
chr1	78960499	78963894
chr1	79114564	79120973
chr1	79301323	79304129
chr1	79304939	79307897
chr1	79468651	79473011
chr1	79505499	79508665
chr1	79516546	79519600
chr1	81702575	81705014
chr1	82145089	82147756
chr1	82690774	82694244
chr1	83528449	83531471
chr1	84625178	84638659
chr1	84766202	84771334
chr1	84898504	84901616
chr1	84944218	84947876
chr1	84968216	84973706
chr1	85038500	85040184
chr1	85063961	85066266
chr1	85068058	85070805
chr1	85153767	85155978
chr1	85163368	85165289
chr1	85356024	85359836
chr1	85460824	85463229
chr1	85740178	85743297
chr1	85824896	85828161
chr1	85871782	85874443
chr1	85928530	85931793
chr1	85985834	85989308
chr1	85989885	85994073
chr1	86041638	86046092
chr1	86047837	86051761
chr1	86093660	86096582
chr1	86171683	86175127
chr1	86845868	86851172
chr1	86857905	86862895
chr1	87168895	87173366
chr1	87377523	87384031
chr1	87393093	87396489
chr1	87793002	87803375
chr1	88148322	88152333
chr1	89148120	89153091
chr1	89355458	89358593
chr1	89486260	89489489
chr1	89526993	89531988
chr1	89533709	89536657
chr1	89589237	89592601
chr1	89662809	89665983
chr1	89872237	89875543
chr1	89988558	89991947
chr1	90031395	90034707
chr1	90098655	90102758
chr1	90184542	90187281
chr1	90227468	90229781
chr1	90307483	90310953
chr1	90460020	90463567
chr1	91867129	91870899
chr1	91965312	91969560
chr1	92196051	92198863
chr1	92763131	92767458
chr1	93249078	93252078
chr1	93387205	93390658
chr1	93545451	93547949
chr1	93642498	93645508
chr1	93646497	93651527
chr1	93789704	93791613
chr1	93812047	93817597
chr1	94002867	94007130
chr1	94343289	94345776
chr1	94371089	94374622
chr1	94692083	94702958
chr1	94708840	94714327
chr1	95004329	95007252
chr1	95247889	95250453
chr1	95328196	95332850
chr1	95389370	95396290
chr1	95486430	95490051
chr1	95537177	95539572
chr1	97024162	97026778
chr1	97187757	97189939
chr1	98115484	98118694
chr1	98202725	98207342
chr1	98313914	98317814
chr1	98368797	98373203
chr1	98381860	98387412
chr1	98411844	98415259
chr1	98471668	98476876
chr1	98490707	98502412
chr1	98517594	98521336
chr1	98788262	98794214
chr1	99125396	99130163
chr1	99133310	99136383
chr1	99729045	99733735
chr1	100231252	100233310
chr1	100314834	100318080
chr1	100434506	100437038
chr1	100501948	100506132
chr1	100595822	100600648
chr1	100714064	100716521
chr1	100816404	100818424
chr1	101184015	101188660
chr1	101311947	101313994
chr1	101357885	101361978
chr1	101490020	101492994
chr1	101700330	101704749
chr1	103179171	103182326
chr1	103571480	103574058
chr1	104569101	104572946
chr1	104646043	104648425
chr1	106839191	106841030
chr1	107557802	107560333
chr1	107598968	107601728
chr1	107680919	107689559
chr1	107805286	107808757
chr1	107814985	107817875
chr1	108476362	108480526
chr1	108505197	108507851
chr1	108740839	108744533
chr1	109232929	109235202
chr1	109261511	109265871
chr1	109356676	109360527
chr1	109369972	109374811
chr1	109420038	109423139
chr1	109504513	109507430
chr1	109911898	109915010
chr1	109931993	109937833
chr1	109967034	109970769
chr1	110088628	110093674
chr1	110526415	110529786
chr1	110544934	110548245
chr1	110882268	110887998
chr1	111681421	111685214
chr1	112162050	112165078
chr1	112278894	112283554
chr1	112297218	112299985
chr1	112935713	112941683
chr1	113159545	113162625
chr1	113496091	113501516
chr1	113614150	113617327
chr1	113930835	113939031
chr1	114299833	114303350
chr1	114351011	114355754
chr1	114446055	114449344
chr1	114470076	114475563
chr1	115018346	115020869
chr1	115050606	115053707
chr1	115298064	115301659
chr1	116104853	116108024
chr1	116210937	116214435
chr1	116916399	116922213
chr1	117395658	117399353
chr1	117601186	117603846
chr1	117634981	117638953
chr1	117909788	117915033
chr1	120216331	120219087
chr1	120254141	120257550
chr1	120536358	120538955
chr1	120555997	120564517
chr1	120578735	120585590
chr1	120586085	120589269
chr1	120592300	120599238
chr1	120601176	120603559
chr1	120607603	120614380
chr1	120683014	120689237
chr1	120752696	120754747
chr1	120787165	120790311
chr1	120832965	120841526
chr1	120903733	120908134
chr1	121125719	121128249
chr1	143727188	143743942
chr1	143884049	143887210
chr1	143891732	143893691
chr1	143910213	143919799
chr1	143961671	143964640
chr1	143989708	143993838
chr1	143997422	144000300
chr1	144089889	144092336
chr1	144310395	144313301
chr1	144323557	144342293
chr1	144490691	144494142
chr1	144503130	144520541
chr1	144567286	144569264
chr1	144571351	144573843
chr1	144592836	144596397
chr1	144689100	144693323
chr1	144705959	144710008
chr1	144890552	144893428
chr1	144923618	144933639
chr1	144940466	144942713
chr1	144964854	144968419
chr1	144981479	144985053
chr1	144987950	144991340
chr1	145023492	145025862
chr1	145026592	145030517
chr1	145031922	145034583
chr1	145037664	145044135
chr1	145072727	145077381
chr1	145089722	145094382
chr1	145095850	145100669
chr1	145126159	145132402
chr1	145137476	145141617
chr1	145214780	145220262
chr1	145222260	145228726
chr1	145232829	145235558
chr1	145281927	145286117
chr1	145381125	145384876
chr1	145436356	145444500
chr1	145454176	145456812
chr1	145469030	145473670
chr1	145475426	145480569
chr1	145506587	145508926
chr1	145514565	145517476
chr1	145524360	145527033
chr1	145541831	145544825
chr1	145608368	145612939
chr1	145615658	145617678
chr1	145967051	145969951
chr1	146002982	146005185
chr1	146007884	146009886
chr1	146372819	146376429
chr1	146554945	146557818
chr1	146638483	146646128
chr1	146695875	146698402
chr1	146713326	146718269
chr1	147139808	147143339
chr1	147399767	147403414
chr1	147509215	147512265
chr1	147545103	147546684
chr1	147872412	147876226
chr1	147914163	147923260
chr1	147923606	147931509
chr1	147992979	147995825
chr1	147998289	148001615
chr1	148240385	148243041
chr1	148246139	148248863
chr1	148526992	148528653
chr1	148530811	148533293
chr1	148554954	148558732
chr1	148597505	148600074
chr1	148603124	148606310
chr1	148759286	148762564
chr1	148926692	148931948
chr1	149214278	149216250
chr1	149395396	149401272
chr1	149437648	149440555
chr1	149576932	149594276
chr1	149779725	149785791
chr1	149800982	149806798
chr1	149809604	149828081
chr1	149829534	149836151
chr1	149854910	149860965
chr1	149898543	149901698
chr1	149907384	149911705
chr1	149978663	149983729
chr1	150037170	150041518
chr1	150158040	150160758
chr1	150205353	150208142
chr1	150227807	150229448
chr1	150334611	150340803
chr1	150487149	150489726
chr1	150532502	150536952
chr1	150539563	150543236
chr1	150546690	150551648
chr1	150667795	150671721
chr1	150736732	150739140
chr1	150846152	150850283
chr1	150943451	150946897
chr1	150977084	150979856
chr1	151019761	151021725
chr1	151031830	151035959
chr1	151136739	151140186
chr1	151167022	151173431
chr1	151226770	151228615
chr1	151253383	151256889
chr1	151283726	151286247
chr1	151299644	151302142
chr1	151318772	151320856
chr1	151511540	151516494
chr1	151583736	151589536
chr1	151692376	151694853
chr1	151734505	151737619
chr1	151758511	151759816
chr1	151762234	151764941
chr1	151880613	151883256
chr1	151952303	151955543
chr1	151959664	151968726
chr1	152006544	152010199
chr1	152019338	152022428
chr1	152856482	152859131
chr1	153505316	153509479
chr1	153516258	153519007
chr1	153537752	153540434
chr1	153583733	153586516
chr1	153643105	153645228
chr1	153747308	153749179
chr1	153853366	153855933
chr1	153895031	153897196
chr1	153933466	153937294
chr1	153938682	153941636
chr1	153948141	153951427
chr1	153956548	153960417
chr1	154152905	154156444
chr1	154193677	154197581
chr1	154243412	154246090
chr1	154298036	154300328
chr1	154377169	154381039
chr1	154578789	154582352
chr1	154838940	154843717
chr1	154907734	154910813
chr1	154932796	154935830
chr1	154954692	154957102
chr1	155035014	155037674
chr1	155056497	155058841
chr1	155106888	155110266
chr1	155194142	155198029
chr1	155212566	155215493
chr1	155277801	155281237
chr1	155292036	155296107
chr1	155433373	155438113
chr1	155529205	155534566
chr1	155579254	155581099
chr1	155620046	155622882
chr1	155656161	155660623
chr1	155714604	155716918
chr1	155825474	155829607
chr1	155899869	155905144
chr1	155947884	155954153
chr1	156023625	156026615
chr1	156084631	156099690
chr1	156182075	156184382
chr1	156250893	156253970
chr1	156305675	156308896
chr1	156469892	156473661
chr1	156540661	156542817
chr1	156569358	156572163
chr1	156695221	156700088
chr1	156709594	156711803
chr1	156717072	156721081
chr1	156735554	156740586
chr1	156828225	156831471
chr1	156839883	156841317
chr1	157011529	157016681
chr1	157106194	157109873
chr1	157931144	157933716
chr1	157937648	157940425
chr1	157963590	157965763
chr1	157978764	157981541
chr1	157988656	157992038
chr1	158506426	158509522
chr1	158621369	158624021
chr1	158967959	158972589
chr1	158978740	158983466
chr1	159043069	159047859
chr1	159060141	159062955
chr1	159328364	159331164
chr1	159822659	159825392
chr1	159892130	159896702
chr1	159998879	160003431
chr1	160229704	160233257
chr1	160253585	160257102
chr1	160310175	160314666
chr1	161013873	161016465
chr1	161083733	161089873
chr1	161099445	161104192
chr1	161122607	161125043
chr1	161134706	161137236
chr1	161170635	161173326
chr1	161282804	161286085
chr1	161367866	161371112
chr1	161397048	161400492
chr1	161410563	161414227
chr1	161418290	161421742
chr1	161424958	161429687
chr1	161432367	161436914
chr1	161437852	161443995
chr1	161482885	161485750
chr1	161508820	161510923
chr1	161563913	161566430
chr1	161579768	161584086
chr1	161590247	161592717
chr1	161675236	161677707
chr1	161695333	161698906
chr1	161718436	161720769
chr1	161851225	161856190
chr1	161931051	161933764
chr1	161972634	161974559
chr1	161988730	161995023
chr1	162466578	162470114
chr1	162531630	162534422
chr1	162595369	162598063
chr1	162598672	162607935
chr1	162659340	162662551
chr1	162791126	162794180
chr1	163037414	163042859
chr1	163053184	163056901
chr1	163139827	163143621
chr1	163290185	163293619
chr1	163843358	163846995
chr1	164484488	164487065
chr1	164526464	164536589
chr1	164570949	164573372
chr1	164675322	164677869
chr1	164721789	164726062
chr1	165598729	165603899
chr1	165665067	165668339
chr1	165736043	165739460
chr1	165796994	165799396
chr1	166843703	166847111
chr1	167187609	167190218
chr1	167682552	167687020
chr1	167689953	167693441
chr1	167902951	167908766
chr1	168147548	168150225
chr1	168195528	168198491
chr1	168376587	168379130
chr1	168438270	168441041
chr1	169074941	169080951
chr1	169334368	169339476
chr1	169394735	169397858
chr1	169451760	169457106
chr1	169762994	169766262
chr1	169861254	169864301
chr1	169900429	169905244
chr1	170035341	170044616
chr1	170498683	170504402
chr1	170554893	170564886
chr1	170630801	170648182
chr1	170653683	170664716
chr1	170665587	170668919
chr1	171453157	171458367
chr1	171707824	171713407
chr1	171870087	171872678
chr1	172107977	172116753
chr1	172148657	172152879
chr1	172237650	172241885
chr1	172289416	172293538
chr1	172311642	172314929
chr1	172325311	172330006
chr1	172499652	172506043
chr1	172517395	172520827
chr1	173091356	173093093
chr1	173398034	173400772
chr1	173444230	173446277
chr1	173446797	173449653
chr1	173499760	173502199
chr1	173682844	173687153
chr1	173792128	173794934
chr1	173836315	173839852
chr1	173985787	173993251
chr1	174126896	174130358
chr1	174382371	174384347
chr1	174767617	174771057
chr1	174958508	174961096
chr1	174968201	174971016
chr1	176172604	176177921
chr1	178063095	178068531
chr1	178069543	178071524
chr1	178094507	178098608
chr1	178105754	178109713
chr1	178112639	178115683
chr1	178160359	178163408
chr1	178308429	178314744
chr1	178339730	178342861
chr1	178694610	178698298
chr1	178835173	178843079
chr1	178908364	178912315
chr1	178998519	179002972
chr1	179049953	179053064
chr1	179110129	179114492
chr1	179262164	179264967
chr1	179334273	179336067
chr1	179845128	179847596
chr1	179849893	179853879
chr1	179922710	179927414
chr1	180470656	180473471
chr1	180601157	180604094
chr1	180989448	180991482
chr1	181001832	181004109
chr1	181058599	181062263
chr1	182570424	182574395
chr1	182582363	182586166
chr1	182757467	182760106
chr1	182808799	182812455
chr1	182992614	182997130
chr1	183012011	183015289
chr1	183202860	183205256
chr1	183438297	183441599
chr1	183483046	183485159
chr1	183600696	183610879
chr1	183773399	183776556
chr1	183810800	183813325
chr1	183985245	183989804
chr1	184019339	184023291
chr1	184356504	184359256
chr1	184460130	184462499
chr1	184721128	184725793
chr1	184759030	184762753
chr1	184939059	184944893
chr1	185014454	185018093
chr1	185123466	185128787
chr1	185280974	185288777
chr1	185702403	185706814
chr1	186151644	186154595
chr1	186156586	186158999
chr1	186342332	186346988
chr1	186647743	186653699
chr1	186671385	186674027
chr1	186787534	186789439
chr1	186797006	186803639
chr1	187238357	187240783
chr1	189317907	189322697
chr1	190348588	190352033
chr1	190442026	190448945
chr1	190546444	190549863
chr1	191608735	191612212
chr1	192445917	192448495
chr1	192525708	192529481
chr1	192601368	192604340
chr1	192774672	192783610
chr1	192872095	192874915
chr1	192920114	192922587
chr1	193026033	193030756
chr1	193071934	193075200
chr1	193090058	193094156
chr1	193153571	193156826
chr1	193385935	193389223
chr1	196239524	196242622
chr1	196526313	196529898
chr1	196574864	196578774
chr1	196619734	196626038
chr1	197112608	197115707
chr1	197166150	197172783
chr1	197627169	197630915
chr1	197640789	197646645
chr1	197661528	197665051
chr1	197741591	197744604
chr1	198123834	198126243
chr1	198126427	198131112
chr1	198145541	198150050
chr1	198202213	198205198
chr1	198262246	198266491
chr1	198625424	198628511
chr1	198649995	198652795
chr1	198848756	198851908
chr1	198870407	198874921
chr1	198887274	198889991
chr1	198896879	198907582
chr1	199668256	199673084
chr1	200270368	200272678
chr1	200320243	200322321
chr1	200373816	200377037
chr1	200383991	200386382
chr1	200588597	200592675
chr1	200708333	200712810
chr1	201434945	201439036
chr1	201474092	201476930
chr1	201506724	201510509
chr1	201510820	201513866
chr1	201617174	201620030
chr1	201913945	201917195
chr1	202317016	202319857
chr1	202773898	202776843
chr1	202777460	202781270
chr1	203295011	203297624
chr1	203524777	203529087
chr1	203595712	203600458
chr1	203829227	203832302
chr1	204374772	204381834
chr1	204385928	204388778
chr1	204461756	204465426
chr1	204474571	204478343
chr1	205090040	205092580
chr1	205341187	205344550
chr1	206087089	206091433
chr1	206131477	206141235
chr1	206157792	206159768
chr1	206160333	206163263
chr1	206164198	206167327
chr1	206552831	206555690
chr1	206576111	206579322
chr1	206679896	206684477
chr1	206806779	206813463
chr1	206859026	206862143
chr1	206864696	206868067
chr1	206877723	206880423
chr1	207923124	207927795
chr1	208259075	208260972
chr1	208415909	208419131
chr1	210001042	210005836
chr1	210409001	210411416
chr1	210411825	210413930
chr1	210435196	210437691
chr1	210464083	210467359
chr1	211430552	211433141
chr1	211554675	211557523
chr1	211749147	211752996
chr1	211847546	211850143
chr1	212000764	212005236
chr1	212203810	212205729
chr1	212207307	212214704
chr1	212459004	212464302
chr1	212483707	212487764
chr1	212782073	212786533
chr1	212809429	212812563
chr1	212871065	212875034
chr1	212925478	212927671
chr1	213030177	213035032
chr1	213186876	213189733
chr1	213223777	213227147
chr1	213241704	213247024
chr1	214161146	214162747
chr1	214598508	214603101
chr1	214617807	214621702
chr1	214628110	214631121
chr1	214686262	214690946
chr1	214698025	214700311
chr1	214719618	214726402
chr1	214754083	214757976
chr1	214774653	214778870
chr1	215286635	215291033
chr1	215364506	215367220
chr1	215739156	215745151
chr1	216018167	216020562
chr1	216703497	216706081
chr1	217799417	217806124
chr1	218457367	218460463
chr1	218517564	218525331
chr1	218671178	218673137
chr1	218831853	218835058
chr1	219346479	219349820
chr1	220051288	220055316
chr1	220217257	220219686
chr1	220262010	220263821
chr1	220700168	220704171
chr1	220920609	220922888
chr1	221051221	221054758
chr1	221290143	221292962
chr1	221462821	221465839
chr1	221897956	221901054
chr1	221913041	221917558
chr1	222761409	222764148
chr1	222791768	222794137
chr1	222883091	222887896
chr1	222986947	222992344
chr1	223069936	223073591
chr1	223099629	223105186
chr1	223144268	223148938
chr1	223888082	223891827
chr1	223893649	223896383
chr1	223900582	223905085
chr1	224018781	224021162
chr1	224028701	224033547
chr1	224301092	224304709
chr1	224390843	224393792
chr1	224516274	224519687
chr1	224520599	224522673
chr1	224544065	224547461
chr1	224617964	224621290
chr1	224622367	224624861
chr1	224685350	224687435
chr1	224727313	224733284
chr1	224805056	224809630
chr1	225611670	225615473
chr1	225789558	225792411
chr1	225835233	225840319
chr1	225841226	225844247
chr1	225886681	225889569
chr1	225923088	225925767
chr1	225964422	225967868
chr1	226734884	226738287
chr1	226924874	226928370
chr1	227485733	227488254
chr1	227499242	227507717
chr1	228306703	228310023
chr1	228643028	228649985
chr1	228651098	228653890
chr1	228782356	228785071
chr1	229407120	229410236
chr1	229472458	229478327
chr1	229642104	229645685
chr1	230201293	230206284
chr1	230219657	230222598
chr1	230237743	230242678
chr1	230303891	230307764
chr1	230356673	230359099
chr1	231000973	231003927
chr1	231112697	231115972
chr1	231273965	231276870
chr1	231375500	231379625
chr1	231468226	231476735
chr1	231530248	231532539
chr1	231551926	231558186
chr1	232612419	232614634
chr1	232762832	232766941
chr1	233085309	233088937
chr1	233247642	233250992
chr1	233427271	233431068
chr1	234507404	234511443
chr1	234535773	234537557
chr1	234634146	234637957
chr1	234738152	234743256
chr1	234745812	234750768
chr1	234791134	234794418
chr1	234858138	234861488
chr1	234943786	234946049
chr1	235096782	235101065
chr1	235431984	235435818
chr1	235487167	235496326
chr1	235529782	235532054
chr1	235665084	235670256
chr1	236027321	236031939
chr1	236044134	236047409
chr1	236443397	236446491
chr1	236557016	236559045
chr1	236957659	236960946
chr1	238810264	238814071
chr1	240253633	240258194
chr1	240262649	240266060
chr1	240548432	240551161
chr1	240627245	240630629
chr1	240739093	240741478
chr1	240770330	240777817
chr1	240819017	240822840
chr1	241679978	241684944
chr1	241693885	241696362
chr1	241800858	241803053
chr1	241911784	241913909
chr1	242009988	242014671
chr1	242309251	242311925
chr1	243397086	243400887
chr1	243413152	243421822
chr1	243516508	243518693
chr1	243583354	243586663
chr1	243874646	243878502
chr1	243893576	243896175
chr1	243925435	243929679
chr1	243989530	243992190
chr1	244008838	244013023
chr1	244080141	244082429
chr1	244173437	244176933
chr1	244212933	244216657
chr1	244435722	244438408
chr1	244608215	244615181
chr1	244762364	244764787
chr1	244815223	244819160
chr1	244996520	245002454
chr1	245132142	245136410
chr1	245316775	245321432
chr1	246578042	246581670
chr1	246727374	246731929
chr1	246749722	246752240
chr1	246886431	246889517
chr1	248069065	248071632
chr1	249119391	249121423
chr1	249218584	249221967
chr10	728289	730445
chr10	1089969	1093654
chr10	3136499	3139023
chr10	3493521	3496140
chr10	3508578	3512427
chr10	3535210	3538016
chr10	3568883	3571146
chr10	3846539	3849948
chr10	4282647	4286841
chr10	4712901	4717242
chr10	5004725	5007531
chr10	5044055	5046798
chr10	5135886	5138941
chr10	5751441	5755188
chr10	5851150	5856961
chr10	6183007	6185117
chr10	6778667	6781636
chr10	6806756	6809169
chr10	6820751	6824880
chr10	8067042	8069398
chr10	11204993	11209116
chr10	11568887	11575995
chr10	11644651	11649487
chr10	11650708	11653119
chr10	12236058	12240882
chr10	13142501	13144821
chr10	13747230	13751109
chr10	13931386	13933726
chr10	14921299	14924317
chr10	14994634	14996892
chr10	15000229	15002592
chr10	15125670	15127774
chr10	15899057	15903417
chr10	16869139	16871826
chr10	17103129	17106236
chr10	17240124	17244546
chr10	17249933	17253141
chr10	17254815	17259401
chr10	17268484	17270909
chr10	17684132	17688502
chr10	18429574	18433543
chr10	18445973	18449488
chr10	18452603	18455237
chr10	18467610	18470003
chr10	18629101	18630785
chr10	18936722	18941562
chr10	21580243	21582984
chr10	21799333	21814968
chr10	21815127	21822970
chr10	22289749	22293422
chr10	22516940	22520316
chr10	22542048	22546734
chr10	22595971	22609470
chr10	22611147	22614458
chr10	22715924	22719623
chr10	22906720	22910430
chr10	22912314	22917174
chr10	22970359	22974014
chr10	22999211	23002732
chr10	23220213	23222881
chr10	23633133	23636917
chr10	23728894	23732638
chr10	24496670	24500275
chr10	24631640	24634341
chr10	24736646	24741200
chr10	24751951	24758553
chr10	25006935	25012434
chr10	25246592	25248506
chr10	25303724	25307368
chr10	26556989	26559977
chr10	27146524	27149479
chr10	27440962	27445763
chr10	28013504	28018284
chr10	28466659	28468857
chr10	28524202	28526252
chr10	28966845	28970863
chr10	29920881	29925933
chr10	29934107	29939285
chr10	30343922	30349352
chr10	30722169	30728055
chr10	31272799	31275661
chr10	31549418	31553198
chr10	31602735	31608038
chr10	31609146	31612640
chr10	31633923	31638859
chr10	31712467	31716873
chr10	32213972	32220476
chr10	32340169	32344639
chr10	32636293	32640260
chr10	32664773	32669639
chr10	32734123	32736788
chr10	33238288	33241936
chr10	33241965	33246888
chr10	33247002	33250037
chr10	33250342	33252853
chr10	33268677	33273335
chr10	33293425	33295445
chr10	33560295	33563538
chr10	33579320	33581614
chr10	33618040	33623650
chr10	33628848	33631457
chr10	34568352	34571087
chr10	34815054	34818261
chr10	34826390	34829525
chr10	35069025	35071275
chr10	35483205	35486795
chr10	35625823	35629468
chr10	36737438	36740298
chr10	37436991	37443458
chr10	37450152	37457056
chr10	37461211	37469146
chr10	37470794	37478717
chr10	37504169	37515159
chr10	38142788	38146811
chr10	38298449	38301252
chr10	38644551	38647191
chr10	46087701	46090148
chr10	46912738	46915272
chr10	49571450	49573859
chr10	49809115	49813850
chr10	51368789	51373117
chr10	52084227	52087881
chr10	52175101	52179475
chr10	52189877	52192701
chr10	52363016	52366106
chr10	52383840	52386632
chr10	52749610	52754086
chr10	52832749	52838335
chr10	52867793	52871209
chr10	52982739	52985440
chr10	56991647	56994563
chr10	57267914	57270307
chr10	57998833	58002155
chr10	58119959	58122730
chr10	58380891	58383661
chr10	60023485	60031147
chr10	60233137	60236892
chr10	60271314	60275512
chr10	60419863	60422911
chr10	60424903	60428083
chr10	60514437	60517708
chr10	61120184	61123377
chr10	61666036	61668810
chr10	61841698	61844326
chr10	61896430	61902214
chr10	61925435	61927841
chr10	61996270	61999363
chr10	62072386	62075921
chr10	62294161	62297404
chr10	62329597	62334034
chr10	62334412	62337182
chr10	62537126	62543365
chr10	62701928	62705047
chr10	62723008	62725471
chr10	63156455	63160259
chr10	63594726	63598186
chr10	63657436	63662858
chr10	63696754	63700394
chr10	63733271	63736108
chr10	63751679	63755821
chr10	63778236	63781092
chr10	63796003	63799255
chr10	63807656	63812010
chr10	63840844	63843938
chr10	64023748	64030323
chr10	64385657	64388541
chr10	64564857	64568686
chr10	64574859	64578666
chr10	64964030	64968664
chr10	65023918	65031364
chr10	65155313	65157167
chr10	65168200	65171024
chr10	65174007	65177821
chr10	65225372	65228809
chr10	65239111	65242832
chr10	65250968	65252955
chr10	65311872	65315366
chr10	65387347	65392071
chr10	65457638	65461104
chr10	65470826	65474274
chr10	68557974	68560674
chr10	69366235	69368108
chr10	69522583	69525540
chr10	69595428	69598490
chr10	69830963	69835044
chr10	70092272	70095864
chr10	70320563	70324031
chr10	70359542	70361850
chr10	70629839	70632136
chr10	70660017	70662974
chr10	70847178	70849493
chr10	70882777	70885924
chr10	70937927	70942154
chr10	73607876	73610916
chr10	74018905	74021930
chr10	74383673	74386682
chr10	74451187	74455796
chr10	74561584	74563778
chr10	74589395	74594450
chr10	74853659	74856968
chr10	75004146	75008491
chr10	75171378	75175413
chr10	75253109	75256691
chr10	75488546	75491347
chr10	75645751	75649267
chr10	75666204	75672197
chr10	75909669	75913875
chr10	75935258	75939713
chr10	75949273	75950874
chr10	76048447	76052068
chr10	78922517	78926470
chr10	79289608	79294219
chr10	79394566	79396572
chr10	81586107	81590095
chr10	81837828	81840399
chr10	82167240	82170096
chr10	83055869	83058528
chr10	86088626	86091778
chr10	86183308	86186362
chr10	88516731	88519882
chr10	88557318	88559646
chr10	88842420	88845568
chr10	88849551	88854739
chr10	89101910	89104888
chr10	89263101	89267918
chr10	89574500	89579087
chr10	89623674	89632611
chr10	89633295	89636731
chr10	90144685	90147740
chr10	90551827	90554764
chr10	90639251	90644024
chr10	90709433	90713230
chr10	90733382	90736487
chr10	90748671	90755436
chr10	90758251	90761942
chr10	90964948	90968279
chr10	91010202	91012308
chr10	91060622	91065104
chr10	91086554	91089995
chr10	91091494	91094280
chr10	91110337	91113059
chr10	91151329	91154895
chr10	91175249	91180292
chr10	91401809	91404601
chr10	91459791	91467348
chr10	91619400	91622896
chr10	92614205	92617177
chr10	92630258	92633564
chr10	93169968	93175963
chr10	93390553	93394032
chr10	93682827	93686354
chr10	94000146	94001938
chr10	94331155	94333932
chr10	94352312	94357609
chr10	95195402	95197853
chr10	95239142	95244054
chr10	95254910	95258762
chr10	95460927	95464445
chr10	95652498	95655846
chr10	96118886	96123420
chr10	96167223	96171153
chr10	96171599	96173936
chr10	96304543	96307526
chr10	97802432	97805803
chr10	99037415	99039835
chr10	99050349	99053378
chr10	99091508	99093985
chr10	99443167	99446462
chr10	101377054	101379902
chr10	101417955	101421827
chr10	101735109	101738130
chr10	101764758	101769467
chr10	101943950	101947151
chr10	102105295	102111623
chr10	102671695	102674762
chr10	102825135	102828201
chr10	103244467	103247703
chr10	103452645	103455867
chr10	103574125	103577663
chr10	104004600	104007290
chr10	104260752	104263927
chr10	104678805	104682351
chr10	105653653	105656033
chr10	105727354	105731999
chr10	105879161	105883871
chr10	106014778	106016850
chr10	106088516	106091152
chr10	106095550	106100826
chr10	106109241	106113185
chr10	107596171	107599042
chr10	111764580	111772709
chr10	111791465	111795361
chr10	111834296	111838379
chr10	112000350	112003042
chr10	112064621	112066938
chr10	112258428	112261756
chr10	112326440	112329762
chr10	112404390	112413017
chr10	112632397	112635834
chr10	112675737	112684246
chr10	114282543	114296859
chr10	114321546	114325711
chr10	114343634	114348910
chr10	114712648	114720217
chr10	114817342	114820686
chr10	114872711	114878675
chr10	114880311	114893064
chr10	115143657	115146523
chr10	115611983	115618078
chr10	115931635	115933518
chr10	116284297	116287414
chr10	116389742	116395275
chr10	116440997	116445597
chr10	116472733	116476028
chr10	116582202	116586424
chr10	116966712	116969244
chr10	119131306	119133959
chr10	119803059	119806443
chr10	120965676	120972227
chr10	121411477	121414733
chr10	121629130	121631798
chr10	122609988	122612652
chr10	123512873	123514546
chr10	123871193	123877526
chr10	123886391	123888529
chr10	126842863	126847684
chr10	128074053	128077073
chr10	128085553	128087953
chr10	129795755	129799673
chr10	131750725	131757327
chr10	131757991	131761782
chr10	131907625	131910599
chr10	134141833	134145393
chr10	134351834	134354827
chr10	134479460	134482302
chr10	135460534	135463716
chr11	3009017	3013208
chr11	3876994	3882142
chr11	4715831	4719661
chr11	5644738	5647942
chr11	5710185	5713985
chr11	6623541	6626783
chr11	6946323	6949837
chr11	8890744	8893911
chr11	8926196	8930175
chr11	8931134	8934875
chr11	9022595	9025945
chr11	9252338	9254451
chr11	9595881	9600333
chr11	10002440	10005202
chr11	10313965	10317357
chr11	10322544	10327702
chr11	10560466	10563818
chr11	10830182	10832621
chr11	10877093	10882259
chr11	10918621	10923323
chr11	11862177	11868681
chr11	11878076	11880603
chr11	12107342	12110064
chr11	12696916	12702707
chr11	12712320	12718279
chr11	12848225	12851126
chr11	12860922	12865219
chr11	13236823	13239205
chr11	13460768	13463545
chr11	14344918	14349790
chr11	14521152	14522722
chr11	14666224	14671813
chr11	14719785	14723734
chr11	14786005	14791198
chr11	14911648	14914524
chr11	14994777	14998340
chr11	15836361	15839404
chr11	15989237	15992451
chr11	17097767	17100649
chr11	17227641	17231623
chr11	17372446	17376938
chr11	18340717	18346664
chr11	18404205	18406645
chr11	19138385	19140986
chr11	19259841	19263553
chr11	19732982	19737367
chr11	20409316	20411567
chr11	20984020	20987126
chr11	22645679	22648715
chr11	22849585	22851508
chr11	27382721	27386394
chr11	27404595	27407977
chr11	27485221	27488452
chr11	27489076	27493493
chr11	27526670	27529430
chr11	27714560	27721177
chr11	27738302	27742632
chr11	28123652	28133142
chr11	30343920	30347154
chr11	31529183	31534163
chr11	33279438	33284488
chr11	33398437	33400407
chr11	33500609	33503125
chr11	33710694	33714421
chr11	33742848	33745573
chr11	33754876	33757715
chr11	34379812	34382049
chr11	34459358	34462264
chr11	34936618	34939728
chr11	34996448	35000605
chr11	35161020	35165354
chr11	35642526	35646584
chr11	35682468	35684980
chr11	36029648	36032398
chr11	36529732	36532745
chr11	43379174	43383669
chr11	43662430	43666872
chr11	43701553	43704466
chr11	43757012	43759268
chr11	45867830	45871067
chr11	46119955	46123312
chr11	46135920	46141489
chr11	46579969	46583590
chr11	47544079	47547562
chr11	47884356	47887660
chr11	57333393	57336038
chr11	57528553	57531796
chr11	58340733	58343489
chr11	58347396	58351842
chr11	58908757	58912669
chr11	59316335	59320152
chr11	59322329	59325987
chr11	59520958	59524845
chr11	60680543	60684300
chr11	61127638	61130587
chr11	61559092	61562377
chr11	62319872	62322044
chr11	62494769	62498633
chr11	62571308	62574625
chr11	62622328	62626079
chr11	63449443	63451491
chr11	64035949	64039908
chr11	64426558	64429468
chr11	64683371	64686141
chr11	65185163	65189979
chr11	65193157	65200210
chr11	65258675	65262563
chr11	65625589	65628670
chr11	65654835	65658690
chr11	65768079	65771012
chr11	66886956	66890176
chr11	67005922	67010869
chr11	67120136	67122437
chr11	68605804	68608850
chr11	71638307	71641257
chr11	71788886	71792330
chr11	72523157	72526827
chr11	72850574	72852757
chr11	73468849	73471349
chr11	73879299	73885962
chr11	74302330	74305415
chr11	74658921	74662010
chr11	75524549	75528993
chr11	77749815	77752457
chr11	78283754	78287391
chr11	82609324	82611774
chr11	82743761	82746837
chr11	82779881	82784009
chr11	82869322	82873981
chr11	82903479	82907154
chr11	82994897	82998124
chr11	83390960	83393588
chr11	83921710	83924695
chr11	84632894	84635835
chr11	84769349	84772139
chr11	85337164	85341184
chr11	85357938	85360887
chr11	85371277	85375547
chr11	85426578	85431345
chr11	85773395	85780284
chr11	85954706	85959941
chr11	86011960	86015487
chr11	86380089	86384444
chr11	86511627	86517657
chr11	86747695	86751309
chr11	87906679	87909742
chr11	88067074	88073169
chr11	89866631	89869640
chr11	89953398	89958218
chr11	93469952	93475518
chr11	93516426	93520930
chr11	93860681	93866407
chr11	93867088	93870694
chr11	94224674	94228722
chr11	94500948	94505710
chr11	94526124	94529961
chr11	94706253	94709398
chr11	94799220	94803408
chr11	94960501	94966380
chr11	95522876	95527830
chr11	95654001	95658929
chr11	95887549	95890986
chr11	95989705	95993386
chr11	96025616	96028719
chr11	96039001	96041911
chr11	96070713	96077569
chr11	96119209	96124374
chr11	96437585	96439562
chr11	98206842	98210490
chr11	98889286	98893404
chr11	98939771	98942310
chr11	100554755	100561125
chr11	100718510	100721592
chr11	100796667	100801725
chr11	101618467	101621001
chr11	101783954	101788458
chr11	101982578	101985609
chr11	102008748	102011548
chr11	102041499	102044055
chr11	102149521	102152087
chr11	102183033	102185039
chr11	102187077	102190328
chr11	102214484	102219459
chr11	102320224	102324913
chr11	102430463	102432907
chr11	102978972	102984424
chr11	103282558	103284835
chr11	104836562	104839983
chr11	104903247	104906332
chr11	104913058	104918674
chr11	105479143	105490563
chr11	105589177	105591587
chr11	105889718	105894269
chr11	107327255	107329851
chr11	107432902	107437361
chr11	107710749	107712644
chr11	107727013	107731211
chr11	107798649	107801285
chr11	107878779	107882369
chr11	108092870	108095486
chr11	108336718	108339897
chr11	108366752	108369817
chr11	108429035	108431566
chr11	108739371	108742340
chr11	108764726	108768116
chr11	109964256	109967426
chr11	110163584	110167131
chr11	110299892	110303267
chr11	111473564	111476052
chr11	111808310	111811453
chr11	113544289	113546839
chr11	114165125	114172266
chr11	114268763	114273251
chr11	114309022	114312028
chr11	115371430	115374222
chr11	116641931	116645387
chr11	116799833	116802989
chr11	116912417	116917304
chr11	116964992	116968928
chr11	117197368	117200220
chr11	118441851	118445776
chr11	118659286	118662657
chr11	118798105	118801278
chr11	118990989	118993707
chr11	119076001	119079060
chr11	120195535	120197952
chr11	120206763	120212101
chr11	120214024	120216504
chr11	120266722	120273757
chr11	120301783	120304480
chr11	121161857	121166164
chr11	121966478	121973731
chr11	122019726	122023616
chr11	122027422	122033560
chr11	122035977	122042296
chr11	122042606	122053035
chr11	122070255	122074742
chr11	122174914	122182767
chr11	122235156	122239911
chr11	122591267	122593413
chr11	123057717	123060498
chr11	123062350	123066445
chr11	123984518	123987248
chr11	124491868	124494636
chr11	124513125	124515246
chr11	124822689	124825129
chr11	125363239	125365944
chr11	125494657	125497832
chr11	126080469	126083294
chr11	126187169	126189359
chr11	127907737	127911986
chr11	127921896	127925257
chr11	128077125	128081305
chr11	128365768	128369372
chr11	128376747	128381819
chr11	128387077	128394052
chr11	128454800	128458084
chr11	129011334	129017000
chr11	129118040	129121773
chr11	129940566	129943371
chr11	133988804	133992139
chr11	133993992	133997221
chr11	134121598	134123716
chr11	134818447	134822091
chr12	72783	75794
chr12	493972	498132
chr12	509499	512980
chr12	858799	866982
chr12	1311983	1315757
chr12	1582674	1585360
chr12	1698713	1703557
chr12	1709974	1711930
chr12	2999261	3003118
chr12	3068652	3071333
chr12	3978608	3983343
chr12	6660457	6664993
chr12	6794512	6798296
chr12	6872621	6875502
chr12	6959390	6963465
chr12	7123891	7127630
chr12	8085474	8089897
chr12	9067308	9069729
chr12	9099194	9104707
chr12	9265544	9271926
chr12	9435167	9438464
chr12	9598215	9602480
chr12	9799632	9804207
chr12	9901728	9904385
chr12	9936737	9940973
chr12	10015997	10023792
chr12	10515095	10519523
chr12	10651428	10654776
chr12	10764411	10767388
chr12	10868737	10875880
chr12	11323998	11326936
chr12	11802949	11807357
chr12	11965118	11967716
chr12	12391499	12396715
chr12	12416342	12419547
chr12	12509158	12512469
chr12	12711317	12714909
chr12	12763810	12766963
chr12	12848718	12851884
chr12	12866739	12877273
chr12	12877795	12880652
chr12	13249442	13252813
chr12	13306641	13308691
chr12	13347931	13353672
chr12	14536675	14540165
chr12	14545835	14549021
chr12	14956054	14959067
chr12	15036921	15039784
chr12	15282939	15285690
chr12	15474637	15480035
chr12	15515621	15519054
chr12	15780455	15784180
chr12	15837986	15844654
chr12	15852834	15855741
chr12	15937965	15942239
chr12	16032982	16038097
chr12	16499256	16504528
chr12	16738515	16767330
chr12	18317276	18319512
chr12	18448118	18451123
chr12	19283475	19285914
chr12	19373027	19375721
chr12	19385884	19393503
chr12	19592390	19595819
chr12	19952071	19956801
chr12	20364452	20367256
chr12	20520052	20536987
chr12	20581643	20584730
chr12	20627571	20631761
chr12	20679415	20682302
chr12	20699371	20702509
chr12	20759734	20766248
chr12	21588870	21592796
chr12	21807678	21811566
chr12	22092354	22095203
chr12	22481965	22487372
chr12	22777015	22783246
chr12	24038098	24042309
chr12	24072148	24076092
chr12	24078027	24084491
chr12	24185091	24188952
chr12	24189695	24193081
chr12	24515854	24519184
chr12	24652215	24654442
chr12	24685208	24695898
chr12	24701997	24706192
chr12	24712081	24715501
chr12	24768287	24771981
chr12	25053766	25057404
chr12	25098365	25103257
chr12	25150200	25152527
chr12	26112044	26116749
chr12	26128049	26131328
chr12	26145408	26151061
chr12	26161536	26165636
chr12	26184912	26190758
chr12	26194303	26197835
chr12	26275535	26280714
chr12	26983576	26986513
chr12	27087398	27094694
chr12	27164534	27169212
chr12	27397191	27400871
chr12	27436662	27439922
chr12	27483739	27486195
chr12	27512332	27515810
chr12	27675750	27680225
chr12	27706393	27710148
chr12	27724016	27729385
chr12	27778906	27782522
chr12	27974004	27976506
chr12	28117059	28121237
chr12	29531032	29535693
chr12	29733669	29737224
chr12	29834005	29838381
chr12	29933582	29936717
chr12	31225248	31228831
chr12	31469041	31479452
chr12	31670123	31673426
chr12	31811011	31814055
chr12	32110987	32114740
chr12	32258510	32264743
chr12	32606210	32610571
chr12	32686500	32689485
chr12	32831529	32834319
chr12	32906241	32909663
chr12	39269290	39272909
chr12	39295948	39301719
chr12	39831268	39838171
chr12	40012632	40015243
chr12	40404862	40407686
chr12	40496761	40501827
chr12	40616836	40621004
chr12	42718725	42721842
chr12	42815426	42817803
chr12	44198046	44201404
chr12	45607742	45612646
chr12	45626168	45629603
chr12	45637170	45639546
chr12	46116899	46122849
chr12	46124328	46127831
chr12	46381338	46387092
chr12	46659086	46661577
chr12	46795495	46798718
chr12	46948876	46951932
chr12	47051145	47055808
chr12	47163461	47166607
chr12	47476154	47480617
chr12	48296522	48299223
chr12	48498073	48500819
chr12	48512190	48514363
chr12	49074475	49077539
chr12	49502331	49505444
chr12	49523826	49528115
chr12	49760997	49764278
chr12	49961236	49963756
chr12	50096478	50100917
chr12	50612923	50617518
chr12	50793341	50797583
chr12	50897958	50901284
chr12	51315817	51319186
chr12	51417418	51420385
chr12	51441091	51443645
chr12	51564421	51567253
chr12	52346039	52349530
chr12	53892608	53895799
chr12	53953554	53956049
chr12	53994546	53998244
chr12	54016714	54021408
chr12	54052023	54054208
chr12	54119913	54122504
chr12	54651122	54654604
chr12	54671343	54675580
chr12	56209515	56212885
chr12	56222888	56225784
chr12	56319007	56322478
chr12	56365560	56369392
chr12	56508390	56511624
chr12	56520857	56523739
chr12	56726714	56728916
chr12	56751802	56755057
chr12	56913918	56918327
chr12	57026849	57031323
chr12	57077627	57082780
chr12	57479099	57482723
chr12	58281411	58284738
chr12	58817765	58820300
chr12	59264088	59266737
chr12	59306990	59313545
chr12	59434307	59436737
chr12	59988497	59992660
chr12	60129823	60132688
chr12	62652036	62657266
chr12	62658109	62663434
chr12	62859118	62863608
chr12	62997283	63000734
chr12	63095642	63098290
chr12	63123906	63126467
chr12	64058874	64063985
chr12	64237496	64240765
chr12	64307546	64313768
chr12	64574255	64576761
chr12	64580352	64582769
chr12	65002342	65007553
chr12	65563732	65568693
chr12	65995630	65999842
chr12	66049224	66052406
chr12	66119773	66124108
chr12	66134090	66138016
chr12	66204422	66208421
chr12	66215043	66218962
chr12	66222149	66226250
chr12	66272091	66276326
chr12	66284649	66288570
chr12	66333132	66336540
chr12	66339259	66343081
chr12	66457070	66461729
chr12	66523156	66526824
chr12	66694951	66698405
chr12	67071612	67073790
chr12	67661529	67666425
chr12	68043658	68046483
chr12	68090578	68093773
chr12	68220006	68222733
chr12	69139064	69142984
chr12	69633775	69637729
chr12	70634787	70640764
chr12	71053882	71056842
chr12	71147133	71149892
chr12	72057156	72060363
chr12	72077742	72082472
chr12	72730758	72733332
chr12	73294382	73297746
chr12	73602832	73606273
chr12	74883052	74885879
chr12	74930569	74934925
chr12	75727784	75732316
chr12	75782218	75786538
chr12	75873304	75879483
chr12	75900442	75906068
chr12	76052310	76057051
chr12	76418147	76423178
chr12	76425405	76428930
chr12	76475472	76478161
chr12	76739923	76743168
chr12	76814195	76817818
chr12	76950584	76954971
chr12	77455695	77459136
chr12	78333377	78337864
chr12	78478920	78484075
chr12	79256528	79262139
chr12	79280049	79283331
chr12	80036159	80039901
chr12	80078500	80087920
chr12	80324117	80330910
chr12	80432885	80436826
chr12	80438347	80440584
chr12	80793468	80796614
chr12	81328063	81334566
chr12	81414477	81417177
chr12	81601231	81604343
chr12	82150715	82154531
chr12	83078897	83083283
chr12	85302731	85305959
chr12	85429054	85432024
chr12	86227030	86230406
chr12	88054572	88057031
chr12	88194459	88196684
chr12	88428406	88433170
chr12	88534198	88538741
chr12	88702234	88704767
chr12	88807647	88814860
chr12	88967916	88975688
chr12	89739857	89749937
chr12	89915221	89921184
chr12	90088712	90091485
chr12	90096813	90101720
chr12	90103617	90106590
chr12	90124553	90128280
chr12	90340750	90344395
chr12	90690335	90693935
chr12	91502783	91506486
chr12	91573144	91578016
chr12	91773841	91776495
chr12	91967698	91972350
chr12	92471795	92475324
chr12	92502128	92506512
chr12	92524587	92538800
chr12	92539281	92542180
chr12	93320155	93325240
chr12	93769842	93775940
chr12	93792544	93793675
chr12	94131570	94138078
chr12	94168921	94173252
chr12	94600259	94603039
chr12	94852432	94855414
chr12	95607322	95613997
chr12	95866561	95870121
chr12	95938268	95942235
chr12	96427017	96429535
chr12	96588918	96594244
chr12	96790639	96793318
chr12	96794095	96795977
chr12	97112900	97115468
chr12	98811795	98813533
chr12	98909669	98912629
chr12	98986377	98990426
chr12	99036919	99041288
chr12	100303578	100306484
chr12	100534470	100538113
chr12	100592739	100595739
chr12	100659726	100663897
chr12	100967080	100969769
chr12	101673006	101675302
chr12	101799255	101803020
chr12	102512894	102515361
chr12	104349446	104351870
chr12	104357683	104361476
chr12	104679313	104684614
chr12	104851192	104853950
chr12	105352097	105354404
chr12	105499870	105505191
chr12	105626680	105629774
chr12	105725066	105729215
chr12	106528367	106532610
chr12	106638748	106641294
chr12	107347914	107353343
chr12	107420395	107422954
chr12	107484760	107488832
chr12	108952790	108957855
chr12	109116046	109119394
chr12	109121284	109125288
chr12	110435995	110440076
chr12	110719599	110724528
chr12	110992371	110994583
chr12	111014823	111017457
chr12	111177195	111180340
chr12	111846383	111849480
chr12	112032684	112035599
chr12	112544912	112547907
chr12	113343247	113347518
chr12	113375406	113378869
chr12	113415732	113419331
chr12	116485723	116492342
chr12	116558358	116564665
chr12	116608813	116611582
chr12	116702603	116706509
chr12	116709971	116714973
chr12	116756218	116759433
chr12	117295914	117299911
chr12	118625438	118629342
chr12	118744191	118746730
chr12	118810627	118816324
chr12	119615163	119620321
chr12	120554366	120557762
chr12	120965929	120968639
chr12	121272366	121274271
chr12	122017735	122020859
chr12	122238827	122241813
chr12	122517039	122520976
chr12	122883273	122885887
chr12	122982229	122985912
chr12	123310206	123312447
chr12	124452779	124456757
chr12	125400709	125403164
chr12	125421915	125426014
chr12	127254294	127258478
chr12	127566897	127568992
chr12	132267472	132270759
chr12	133655834	133658498
chr13	20206168	20209890
chr13	20434401	20437490
chr13	20533434	20536638
chr13	20732352	20736091
chr13	21286320	21289982
chr13	21387228	21389434
chr13	21748652	21752107
chr13	21871350	21874009
chr13	22734930	22738307
chr13	23091339	23094633
chr13	23113215	23116595
chr13	23647674	23651631
chr13	23893321	23896376
chr13	24000740	24003634
chr13	24004190	24008468
chr13	24143555	24147530
chr13	24152394	24155400
chr13	24182795	24184789
chr13	24461296	24464924
chr13	24843863	24846958
chr13	25085045	25087775
chr13	25494993	25498016
chr13	26827166	26832208
chr13	27742282	27745207
chr13	28022859	28026646
chr13	28192588	28197660
chr13	28712953	28715374
chr13	29290201	29294241
chr13	30001181	30004795
chr13	30007893	30011620
chr13	30390925	30393753
chr13	30416741	30424992
chr13	30873269	30878733
chr13	30914108	30917597
chr13	30967921	30970962
chr13	31039946	31042269
chr13	31145543	31147769
chr13	31188570	31195703
chr13	31732438	31737770
chr13	32888731	32891383
chr13	33161189	33164945
chr13	33309798	33312814
chr13	33777342	33780770
chr13	33855736	33861130
chr13	34249485	34251581
chr13	34295676	34298629
chr13	34735590	34737979
chr13	35517140	35521029
chr13	36870202	36873319
chr13	36917882	36921530
chr13	37392233	37395473
chr13	37573018	37576894
chr13	38170461	38174134
chr13	38324815	38328463
chr13	38440918	38446645
chr13	38491495	38494837
chr13	38922453	38925037
chr13	39259667	39261632
chr13	39608471	39614100
chr13	40175284	40178804
chr13	41494230	41496257
chr13	41556742	41561129
chr13	41591115	41594266
chr13	41701542	41708295
chr13	41885646	41889978
chr13	42489066	42493146
chr13	42534046	42536909
chr13	42846252	42853850
chr13	43563870	43567679
chr13	43627975	43631165
chr13	44359668	44362812
chr13	44403723	44406476
chr13	44879600	44882531
chr13	44904801	44907525
chr13	45056822	45060958
chr13	45144473	45150651
chr13	45241473	45243679
chr13	45561515	45565243
chr13	45692735	45696405
chr13	45751703	45755823
chr13	45765731	45769589
[truncated: 5,197 more rows]

## Sheet: DIPG13 SUZ12
Chromosome	Start position	End position
chr1	3566090	3569077
chr1	6476420	6482307
chr1	16839271	16841679
chr1	17022631	17026349
chr1	17221126	17223318
chr1	18956392	18964566
chr1	18964762	18973651
chr1	25249319	25259375
chr1	25527992	25532683
chr1	46953530	46959452
chr1	47689388	47693977
chr1	47695678	47699807
chr1	50881631	50895470
chr1	63781890	63797557
chr1	75591979	75597764
chr1	91178397	91182267
chr1	91183840	91186307
chr1	91187720	91194930
chr1	92945472	92953684
chr1	110609129	110614900
chr1	119524997	119537080
chr1	121109207	121111684
chr1	142637379	142639838
chr1	142647445	142650289
chr1	142659253	142664080
chr1	142666100	142670343
chr1	142671286	142675057
chr1	142790476	142792673
chr1	142793606	142797293
chr1	142829591	142832863
chr1	142889866	142893249
chr1	143399223	143403172
chr1	143489271	143492620
chr1	143742357	143745127
chr1	143911333	143914741
chr1	144526920	144530277
chr1	144706989	144709776
chr1	145056266	145060321
chr1	145110596	145114055
chr1	145968389	145970795
chr1	147509984	147512655
chr1	148899781	148904275
chr1	149762924	149765464
chr1	150487217	150490511
chr1	153641881	153646014
chr1	154469326	154474873
chr1	154839121	154843251
chr1	154946038	154948339
chr1	156889419	156893373
chr1	161498858	161501494
chr1	161581338	161583138
chr1	161693736	161697680
chr1	169074169	169077671
chr1	178062072	178064973
chr1	180196957	180214704
chr1	185013295	185015766
chr1	197870340	197874083
chr1	197876684	197890752
chr1	199997517	200000536
chr1	200002368	200013261
chr1	204046805	204050178
chr1	206135792	206139412
chr1	208420428	208423597
chr1	210403694	210408370
chr1	212600870	212604020
chr1	212730008	212733017
chr1	212869396	212872685
chr1	212873521	212878060
chr1	212964756	212967996
chr1	218337015	218340539
chr1	221065375	221069351
chr1	223536354	223538820
chr1	224802574	224805806
chr1	230993361	230996246
chr1	234718419	234721298
chr1	234747511	234750163
chr1	234912003	234918333
chr1	235118373	235121009
chr1	236226453	236230712
chr1	240251398	240255278
chr1	245131159	245134870
chr10	7449983	7452916
chr10	8077148	8081627
chr10	8087772	8097451
chr10	22622758	22626800
chr10	22628847	22632477
chr10	22632699	22636642
chr10	42640173	42642859
chr10	42671701	42674566
chr10	94448401	94452780
chr10	101279564	101282674
chr10	101288678	101298062
chr10	102413491	102415760
chr10	102488157	102492503
chr10	102492981	102511895
chr10	102586107	102590853
chr10	102819937	102821185
chr10	102891034	102896471
chr10	102896774	102900065
chr10	102900602	102905605
chr10	102975603	102980529
chr10	102981361	102991939
chr10	102993541	102998611
chr10	118889932	118896928
chr10	118897165	118901447
chr10	118919114	118925576
chr10	119293694	119297473
chr10	119299137	119311386
chr10	124891557	124912346
chr10	124913052	124914003
chr10	126137205	126140233
chr10	131756217	131759392
chr10	131760213	131765387
chr10	131768317	131770597
chr10	134890310	134893905
chr11	191368	196883
chr11	2160270	2165982
chr11	20180580	20185588
chr11	32450632	32463984
chr11	43598364	43601306
chr11	44325541	44330528
chr11	44330831	44334726
chr11	64645621	64648717
chr11	64792647	64795498
chr11	65485703	65489400
chr11	65549197	65555822
chr11	65625895	65628365
chr11	65654106	65657064
chr11	66078988	66081068
chr11	66102367	66105237
chr11	67135633	67138449
chr11	67272833	67276764
chr11	67397217	67400197
chr11	67572875	67575281
chr11	68776821	68779740
chr11	68869049	68874160
chr11	69828806	69834209
chr11	75350446	75354184
chr11	76547315	76550811
chr11	82867224	82868772
chr11	94500099	94502854
chr11	94962490	94965614
chr11	95069831	95072487
chr11	100997821	101001155
chr11	114035895	114038819
chr11	115373944	115376398
chr11	115799807	115803479
chr11	117469741	117472884
chr11	117532592	117536099
chr11	119492759	119496248
chr11	119598030	119601777
chr11	121566765	121569876
chr11	122850093	122853143
chr11	124710234	124714086
chr11	124745705	124747476
chr11	125927926	125933996
chr11	125952383	125955384
chr11	126007417	126011057
chr11	126412065	126414690
chr11	128589915	128592152
chr11	129240180	129246847
chr11	133677475	133681346
chr11	133800792	133803794
chr12	82782	87059
chr12	91299	95738
chr12	1738428	1741154
chr12	3377019	3379400
chr12	4377490	4380767
chr12	8395655	8397207
chr12	28121197	28124958
chr12	31478754	31480447
chr12	48388821	48393752
chr12	48395276	48400296
chr12	49362497	49368968
chr12	49370718	49379878
chr12	54320208	54326864
chr12	54327379	54336231
chr12	54337313	54341116
chr12	54359308	54372421
chr12	54416374	54430655
chr12	57479408	57482690
chr12	65173230	65177751
chr12	80084923	80087801
chr12	85671748	85676627
chr12	93962570	93969644
chr12	93984922	93987390
chr12	96184318	96187334
chr12	108235871	108239706
chr12	110072048	110073882
chr12	113899598	113903258
chr12	113903821	113906264
chr12	113908922	113914615
chr12	115102219	115104742
chr12	115108512	115111765
chr12	131916854	131921020
chr12	132811557	132816170
chr12	133259708	133263203
chr12	133268129	133272575
chr13	20733636	20736741
chr13	28493060	28498491
chr13	28543034	28545563
chr13	79166648	79169496
chr13	79169668	79171969
chr13	79177847	79181484
chr13	100628465	100637301
chr13	100639224	100645048
chr13	110076373	110076726
chr14	19312008	19316071
chr14	19496793	19499126
chr14	19541022	19543906
chr14	19612447	19616377
chr14	19645572	19651169
chr14	19914689	19917921
chr14	19924418	19929778
chr14	19931023	19934874
chr14	19936608	19940139
chr14	19947098	19951018
chr14	20810442	20812293
chr14	20929196	20931373
chr14	21456272	21459830
chr14	21536800	21540353
chr14	21553462	21557132
chr14	21737097	21739402
chr14	21851395	21854441
chr14	23111564	23115593
chr14	23397563	23400356
chr14	23475012	23477517
chr14	23789724	23791979
chr14	29223308	29231828
chr14	29233351	29236287
chr14	29241968	29244707
chr14	32670121	32672982
chr14	32953387	32954324
chr14	36972476	36976134
chr14	36977376	36985514
chr14	36986051	36993482
chr14	37123229	37133418
chr14	38051656	38055728
chr14	38056822	38064110
chr14	38064436	38069349
chr14	60972531	60978896
chr14	61106662	61111452
chr14	61111932	61120504
chr14	61122874	61126286
chr15	20445335	20448484
chr15	20473568	20476191
chr15	20495390	20501355
chr15	22434382	22438498
chr15	22509168	22514619
chr15	28981047	28984439
chr15	33009769	33014379
chr15	41134302	41137842
chr15	44485295	44487705
chr15	45403897	45408179
chr15	52051060	52054528
chr15	53082129	53095673
chr15	53096182	53099662
chr15	58356752	58359462
chr15	60296949	60299148
chr15	62351946	62353873
chr15	62356968	62362538
chr15	68111550	68118062
chr15	68118746	68122549
chr15	68123696	68128506
chr15	68130692	68133944
chr15	68547180	68549687
chr15	68970706	68974488
chr15	74379877	74382795
chr15	74417443	74421023
chr15	75335806	75339392
chr15	75558394	75562093
chr15	75565904	75570162
chr15	75742592	75748171
chr15	75967090	75971226
chr15	76133626	76135800
chr15	77222356	77224889
chr15	78728244	78731877
chr15	78855706	78861205
chr15	79382287	79385967
chr15	81473247	81476941
chr15	83953590	83955607
chr15	96949159	96959829
chr15	96960091	96962343
chr15	99185999	99188291
chr15	99393943	99398040
chr15	100465121	100468092
chr15	101096127	101099575
chr15	101418423	101424522
chr16	219959	231534
chr16	851532	855231
chr16	1310312	1313049
chr16	1336799	1339349
chr16	1349982	1353362
chr16	1968326	1971357
chr16	2391851	2394807
chr16	2932453	2933736
chr16	2953413	2956605
chr16	3013587	3017451
chr16	3092047	3099297
chr16	3129113	3131714
chr16	3206161	3209558
chr16	3219028	3224837
chr16	3227250	3234741
chr16	3234940	3241446
chr16	4102411	4105314
chr16	5007293	5011022
chr16	8981742	8984865
chr16	9225952	9230049
chr16	21514825	21517867
chr16	21523988	21528136
chr16	21529683	21533715
chr16	21535768	21540234
chr16	22201269	22205337
chr16	22545378	22548776
chr16	24620437	24622581
chr16	28615225	28617887
chr16	30074807	30077474
chr16	30668698	30671037
chr16	32369474	32372946
chr16	32876974	32881043
chr16	34000280	34003115
chr16	46721505	46724632
chr16	56222188	56224985
chr16	57768241	57770747
chr16	58030028	58034772
chr16	58160093	58164236
chr16	62290348	62293926
chr16	67258877	67263138
chr16	67915623	67920194
chr16	70747767	70751292
chr16	70905575	70909544
chr16	72459442	72463211
chr16	73079844	73091929
chr16	73092631	73094970
chr16	73095935	73100786
chr16	73102296	73106225
chr16	73202994	73207169
chr16	73577013	73579958
chr16	74401619	74404581
chr16	75531239	75534926
chr16	83982891	83986236
chr16	84633548	84636653
chr16	85253067	85257054
chr16	85607777	85611100
chr16	85931520	85934616
chr16	86006147	86008129
chr16	86229439	86234494
chr16	86552921	86556954
chr16	86596880	86608448
chr16	86608816	86612873
chr16	86613054	86616679
chr16	86725680	86727547
chr16	87416282	87419498
chr16	87637174	87640278
chr16	88703383	88707833
chr16	88751528	88754169
chr16	89068728	89072016
chr16	89258849	89261651
chr16	89987700	89992042
chr17	894162	897188
chr17	1129804	1132211
chr17	4543605	4549390
chr17	4867409	4871493
chr17	6917030	6921424
chr17	7194028	7197646
chr17	7209683	7211247
chr17	7306480	7308991
chr17	7342904	7346417
chr17	8123636	8126209
chr17	8532191	8535204
chr17	16489028	16493304
chr17	18964631	18968136
chr17	19090148	19094036
chr17	21547656	21554495
chr17	22020126	22023987
chr17	27028089	27031950
chr17	27037843	27040806
chr17	33773614	33777874
chr17	33821806	33824695
chr17	34055690	34059755
chr17	34121207	34129255
chr17	34499033	34503296
chr17	34580181	34584001
chr17	34743877	34746838
chr17	35284004	35302451
chr17	35305403	35307332
chr17	36101681	36107211
chr17	37386861	37391111
chr17	37752768	37766042
chr17	37892682	37896549
chr17	38019785	38021659
chr17	40713482	40717384
chr17	42081169	42085498
chr17	42632201	42635592
chr17	42904259	42907528
chr17	42909770	42913697
chr17	43393590	43395849
chr17	44894413	44899663
chr17	45922431	45931572
chr17	46101786	46104430
chr17	46112131	46116519
chr17	46124403	46127085
chr17	46618098	46622932
chr17	46645774	46649494
chr17	46649867	46662240
chr17	46662504	46666666
chr17	46666835	46700825
chr17	46718311	46725321
chr17	46794045	46810746
chr17	46829038	46831240
chr17	46831479	46834017
chr17	46969493	46970910
chr17	47071020	47077816
chr17	47080233	47082610
chr17	47573480	47576368
chr17	48038918	48051273
chr17	48064957	48074591
chr17	56004194	56010551
chr17	59473782	59477432
chr17	59477746	59487496
chr17	59488059	59491070
chr17	59528124	59540038
chr17	61918313	61921297
chr17	66191042	66197162
chr17	66394765	66398065
chr17	70300047	70305226
chr17	71337023	71339609
chr17	72868657	72869830
chr17	73635495	73639939
chr17	74577958	74583932
chr17	77891106	77895468
chr17	78073005	78076965
chr17	79274188	79277815
chr17	79358666	79361937
chr17	80325353	80332235
chr18	498547	502331
chr18	3593506	3597179
chr18	3601828	3605512
chr18	5627882	5631540
chr18	9736854	9739035
chr18	12073714	12077056
chr18	12375654	12378577
chr18	12418709	12422801
chr18	13921744	13925735
chr18	19742163	19755840
chr18	21267165	21270892
chr18	22809905	22812766
chr18	23668972	23671440
chr18	24234244	24238011
chr18	32556800	32560650
chr18	44334009	44338317
chr18	44771112	44773351
chr18	44773642	44779670
chr18	44785705	44791345
chr18	45661297	45665878
chr18	45866676	45870501
chr18	46062348	46065833
chr18	47086973	47093599
chr18	47441128	47444752
chr18	48343053	48345997
chr18	49190971	49194370
chr18	53663882	53666371
chr18	55092975	55102943
chr18	55710666	55713540
chr18	56171914	56176531
chr18	56806462	56809012
chr18	56966098	56970846
chr18	59990205	59995692
chr18	59997048	60000546
chr18	77904907	77907456
chr19	506496	508322
chr19	679718	682982
chr19	843298	846136
chr19	858839	861326
chr19	919081	922121
chr19	1754597	1759158
chr19	2093895	2096767
chr19	3479106	3483700
chr19	4471408	4475054
chr19	5903306	5905070
chr19	6108614	6111027
chr19	6736663	6738459
chr19	7893534	7895202
chr19	8205208	8210119
chr19	10381324	10383238
chr19	10401535	10404885
chr19	10621051	10625270
chr19	11545036	11547219
chr19	13905366	13908558
chr19	15887338	15890519
chr19	18632334	18633714
chr19	18713659	18717166
chr19	18717767	18722817
chr19	18898209	18901660
chr19	33666930	33669300
chr19	39340681	39342581
chr19	41282280	41285099
chr19	42363616	42365474
chr19	42415116	42419234
chr19	42438468	42443973
chr19	42771700	42773773
chr19	44172329	44174768
chr19	45593552	45597284
chr19	45681119	45682797
chr19	45736231	45739191
chr19	45970161	45973174
chr19	45981278	45983222
chr19	45987528	45990221
chr19	46101620	46106177
chr19	46168180	46173201
chr19	46177991	46181389
chr19	46194407	46196550
chr19	46365574	46368799
chr19	46404606	46406923
chr19	47426857	47430439
chr19	47659265	47662439
chr19	48406539	48409286
chr19	48431204	48434867
chr19	48448347	48456454
chr19	48457018	48462320
chr19	49139706	49142348
chr19	49170781	49173392
chr19	49922948	49930077
chr19	49934147	49941320
chr19	49943381	49947148
chr19	50370557	50374080
chr19	50611917	50614960
chr19	51160925	51163724
chr19	54693436	54696493
chr19	55595216	55599574
chr19	55634244	55637203
chr19	55675434	55679544
chr19	55850534	55851239
chr19	58986018	58988535
chr19	59050462	59054422
chr2	739949	741138
chr2	20864667	20866809
chr2	20867431	20872656
chr2	45027185	45029324
chr2	45156538	45159941
chr2	45160132	45172781
chr2	45179087	45183312
chr2	45233955	45240959
chr2	45394576	45399581
chr2	60591059	60593890
chr2	63276821	63282824
chr2	63283737	63286431
chr2	66801837	66804881
chr2	71113407	71118530
chr2	71121785	71128299
chr2	73141498	73153455
chr2	74723999	74729335
chr2	91630202	91632807
chr2	91676802	91680049
chr2	91842832	91845526
chr2	91956438	91958878
chr2	91994180	91998573
chr2	92230222	92233249
chr2	111980304	111983415
chr2	112655039	112658285
chr2	114259120	114263467
chr2	114347081	114350377
chr2	118978615	118983386
chr2	119599347	119603297
chr2	119604164	119610783
chr2	119612814	119617004
chr2	132827148	132831190
chr2	162270936	162278022
chr2	162282187	162286062
chr2	171567495	171570401
chr2	172946788	172972250
chr2	176934155	176940537
chr2	176941571	176944886
chr2	176945442	176954883
chr2	176955386	176965054
chr2	176966152	176972279
chr2	176972543	176984158
chr2	176984642	176989595
chr2	176989824	177003456
chr2	182542487	182546279
chr2	200323606	200325309
chr2	200326280	200329492
chr20	441784	445020
chr20	1204644	1208360
chr20	1847575	1851607
chr20	2081664	2083556
chr20	2538951	2541765
chr20	2780687	2785586
chr20	2785851	2790602
chr20	3220735	3223179
chr20	3743344	3746695
chr20	4151599	4155848
chr20	10652094	10656261
chr20	13199668	13202191
chr20	17149169	17152037
chr20	17599914	17603699
chr20	18035650	18040246
chr20	19955282	19957984
chr20	20432347	20433727
chr20	20723791	20725852
chr20	20936073	20939260
chr20	21104770	21107454
chr20	21375681	21381639
chr20	21492882	21498804
chr20	24972518	24975938
chr20	25012388	25014950
chr20	25061324	25066890
chr20	26076856	26081174
chr20	30573895	30577086
chr20	33101335	33104497
chr20	34042389	34044873
chr20	35081258	35085142
chr20	35093936	35097444
chr20	35894438	35897306
chr20	37273449	37277029
chr20	37301317	37304988
chr20	37349681	37355982
chr20	37356270	37361452
chr20	37492328	37496110
chr20	37509671	37512795
chr20	43680245	43683250
chr20	43918925	43923087
chr20	44412168	44415802
chr20	44828281	44831012
chr20	44932728	44936512
chr20	44937451	44941968
chr20	45199057	45201662
chr20	45322934	45325877
chr20	45416683	45418481
chr20	45822710	45826154
chr20	46308629	46311781
chr20	47385675	47390987
chr20	48066169	48069553
chr20	49345368	49348775
chr20	50176784	50181428
chr20	50311697	50314530
chr20	55198893	55214047
chr20	55360514	55364544
chr20	55498057	55505729
chr20	55509108	55511906
chr20	55524765	55536674
chr20	55593553	55596643
chr20	56004309	56007967
chr20	56009168	56011196
chr20	56233234	56237187
chr20	56576144	56581274
chr20	56592276	56595674
chr20	57225869	57229004
chr20	57426911	57432160
chr20	57638168	57640723
chr20	57872774	57876903
chr20	59837239	59840741
chr20	60875770	60878965
chr20	61051288	61054328
chr20	61302385	61308048
chr20	61438139	61441990
chr20	61607788	61613347
chr20	61620640	61623483
chr20	61631156	61642435
chr20	61802538	61806263
chr20	62073035	62075498
chr20	62776368	62779495
chr20	62791088	62794344
chr21	9547920	9550899
chr21	9645718	9649069
chr21	9715177	9721181
chr21	9861015	9863542
chr21	9990708	9993789
chr21	10603996	10607466
chr21	10611174	10614377
chr21	28215009	28218529
chr21	33707138	33710815
chr21	36259181	36263842
chr21	38086264	38091194
chr21	43554691	43559271
chr21	44801316	44804544
chr22	16372981	16379730
chr22	18763575	18767138
chr22	19741946	19744568
chr22	20149626	20152098
chr22	21573403	21576705
chr22	22969829	22975917
chr22	22989801	22992467
chr22	25677524	25680942
chr22	25814150	25821651
chr22	31987194	31989234
chr22	36588437	36591779
chr22	36691378	36695465
chr22	37562965	37566385
chr22	38237916	38241068
chr22	41960471	41963416
chr22	42311521	42316533
chr22	42463945	42467495
chr22	42558009	42561507
chr22	43502050	43506635
chr22	44231597	44235262
chr22	46040500	46043995
chr22	46274135	46277019
chr22	46470826	46475565
chr22	46895616	46899623
chr22	47462501	47466536
chr22	49841737	49845441
chr22	49975456	49978719
chr22	50245635	50247565
chr22	50967514	50973675
chr22	51117683	51122421
chr22	51148319	51154119
chr3	11759816	11763955
chr3	13919027	13921688
chr3	27755093	27758410
chr3	27763951	27767547
chr3	27770172	27773565
chr3	33479618	33483143
chr3	62353703	62357258
chr3	62358976	62361941
chr3	62362861	62365958
chr3	75747335	75749660
chr3	75777224	75781652
chr3	114865439	114867328
chr3	128200541	128217782
chr3	129830287	129831601
chr3	137481352	137491820
chr3	138653654	138659829
chr3	138661264	138666989
chr3	138667181	138672037
chr3	147070762	147075591
chr3	147085311	147088295
chr3	147105082	147111955
chr3	147114094	147118869
chr3	147124135	147130526
chr3	147130795	147133929
chr3	147134859	147143178
chr3	157820906	157824204
chr3	168863559	168865820
chr3	184245845	184249196
chr3	197899299	197901680
chr4	1397573	1400042
chr4	1713054	1717472
chr4	3599557	3603219
chr4	4227690	4231836
chr4	4803401	4807401
chr4	4853085	4859377
chr4	4859913	4875703
chr4	13529758	13533550
chr4	13535067	13538879
chr4	13539218	13551315
chr4	17687705	17690748
chr4	18021679	18024580
chr4	41748178	41755349
chr4	41880121	41885550
chr4	49169560	49174008
chr4	49235848	49238956
chr4	85419298	85425262
chr4	106815328	106818559
chr4	109086086	109090035
chr4	109090254	109096182
chr4	111532362	111538050
chr4	111538943	111546159
chr4	111549071	111558224
chr4	111558525	111561934
chr4	113430884	113434640
chr4	113434930	113439165
chr4	113440326	113444893
chr4	141073085	141076022
chr4	149362605	149366124
chr4	174435897	174455566
chr4	174456621	174466225
chr4	175132336	175135693
chr4	175137346	175139533
chr4	184718346	184721716
chr4	186389885	186392906
chr4	186455682	186458659
chr4	190200054	190203029
chr4	190474273	190477178
chr4	190505849	190511893
chr4	190552050	190555548
chr4	190796190	190798447
chr4	190880369	190882968
chr4	191027493	191030353
chr5	1044443	1047925
chr5	1069630	1073588
chr5	4230207	4232112
chr5	10336668	10341037
chr5	16936412	16940609
chr5	17596924	17598458
chr5	32503695	32506917
chr5	34181013	34183469
chr5	42942253	42945280
chr5	42949111	42955122
chr5	42990893	42996972
chr5	42997482	43001335
chr5	43007224	43009730
chr5	54515946	54528583
chr5	54528958	54530842
chr5	68927214	68931124
chr5	69781303	69785067
chr5	72525739	72531133
chr5	72568676	72571560
chr5	72585320	72589750
chr5	72591099	72599203
chr5	72712486	72716817
chr5	72731337	72734787
chr5	72735939	72738644
chr5	72738816	72743830
chr5	72744131	72748488
chr5	76924584	76930866
chr5	76931378	76941178
chr5	76941352	76943584
chr5	92955985	92958465
chr5	114504740	114507834
chr5	122421334	122431832
chr5	122432279	122436163
chr5	134361068	134373330
chr5	134374017	134377168
chr5	137576368	137579930
chr5	139075315	139078634
chr5	139485533	139489144
chr5	139490362	139494282
chr5	140891964	140896441
chr5	153851807	153865820
chr5	170732189	170744584
chr5	170746733	170750758
chr5	172668574	172676271
chr5	180649461	180651251
chr6	1377631	1389441
chr6	1389830	1398711
chr6	1604067	1620848
chr6	1870085	1875200
chr6	4134144	4137587
chr6	5995911	6005173
chr6	10382093	10387318
chr6	10389849	10392869
chr6	10403470	10406276
chr6	10409461	10419255
chr6	10420352	10422590
chr6	26324477	26333041
chr6	26720301	26724646
chr6	26734020	26736139
chr6	26756162	26759363
chr6	26778089	26781125
chr6	27246635	27249582
chr6	27260394	27264564
chr6	27634562	27639197
chr6	28740393	28742824
chr6	28743655	28746997
chr6	30066889	30071539
chr6	31459625	31463662
chr6	31464606	31467113
chr6	32144845	32146486
chr6	36645249	36648832
chr6	37482709	37485743
chr6	45390537	45393533
chr6	50786262	50790400
chr6	50810251	50813563
chr6	50816403	50819734
chr6	51706315	51708785
chr6	52415715	52418400
chr6	58254086	58257325
chr6	85471406	85475229
chr6	85476607	85479480
chr6	85481632	85485040
chr6	99959998	99964070
chr6	100047773	100057233
chr6	100900175	100909674
chr6	100910277	100915790
chr6	106439136	106443359
chr6	106957792	106962138
chr6	108434060	108442531
chr6	108454723	108456550
chr6	108477147	108480612
chr6	108482414	108494527
chr6	108494846	108498330
chr6	126110493	126112951
chr6	133562198	133565852
chr6	134210475	134217339
chr6	134273036	134276025
chr6	137807656	137813131
chr6	137813398	137820282
chr6	150068650	150071859
chr6	150260226	150262781
chr6	150309613	150313717
chr6	152127836	152131159
chr6	161043210	161045856
chr6	161058337	161061171
chr6	168634710	168639112
chr7	331409	335781
chr7	1235737	1238747
chr7	1257639	1260475
chr7	1261540	1272553
chr7	1272720	1296032
chr7	1297572	1300933
chr7	2392606	2394543
chr7	12608622	12612234
chr7	15724105	15729252
chr7	19145556	19153391
chr7	19155117	19156762
chr7	20815822	20819582
chr7	20821141	20828852
chr7	20829477	20831626
chr7	20831941	20834859
chr7	20835223	20839258
chr7	22600517	22603774
chr7	24610478	24612822
chr7	25885127	25889217
chr7	26713933	26717268
chr7	26725026	26729637
chr7	26895710	26898907
chr7	27126261	27131085
chr7	27140399	27144772
chr7	27145214	27148165
chr7	27152138	27159947
chr7	27249338	27257701
chr7	27263068	27270499
chr7	27274902	27288032
chr7	27288206	27292289
chr7	28447811	28451482
chr7	29602581	29606840
chr7	30027139	30031778
chr7	35292366	35304154
chr7	36427543	36430193
chr7	43685799	43688626
chr7	47925733	47928980
chr7	57679170	57683177
chr7	61263391	61265438
chr7	70036826	70040980
chr7	75622227	75626001
chr7	96626758	96630175
chr7	96630481	96638505
chr7	96641142	96643495
chr7	96644138	96657417
chr7	120967931	120972601
chr7	121940180	121946205
chr7	121946969	121951764
chr7	129421026	129427175
chr7	155164542	155169122
chr7	155246367	155250394
chr7	155258582	155261187
chr7	156791526	156795662
chr7	156796233	156802315
chr7	156810192	156816402
chr7	158152739	158154315
chr8	2194970	2199068
chr8	7429342	7432408
chr8	7435568	7438713
chr8	9758836	9763441
chr8	9764092	9767401
chr8	10586407	10591932
chr8	11536776	11540807
chr8	11548799	11551337
chr8	11558163	11562931
chr8	11563985	11568904
chr8	12050835	12052855
chr8	12293093	12294754
chr8	17353524	17357019
chr8	17656738	17660818
chr8	20137339	20140816
chr8	22550260	22553592
chr8	25315023	25316717
chr8	25897541	25901006
chr8	25901320	25909616
chr8	30239653	30243917
chr8	55364753	55369521
chr8	55369985	55374877
chr8	55376647	55384090
chr8	65489244	65492699
chr8	67872495	67876205
chr8	70982654	70985579
chr8	72466052	72471845
chr8	72753484	72757127
chr8	77584211	77587446
chr8	77588360	77591598
chr8	77592566	77596778
chr8	86819393	86822580
chr8	99952227	99960809
chr8	109093119	109095917
chr8	128745729	128749372
chr8	132050494	132054525
chr8	134583885	134587590
chr8	142137509	142141715
chr8	143336488	143337981
chr8	144509127	144511825
chr8	144512365	144513687
chr8	144751621	144753425
chr9	106133	110435
chr9	111799	117116
chr9	838944	842595
chr9	965229	983154
chr9	1044994	1051827
chr9	13568435	13570594
chr9	21964293	21970553
chr9	21973477	21976423
chr9	21992271	21997664
chr9	23824027	23827492
chr9	33752951	33756139
chr9	35516564	35519816
chr9	37024507	37041425
chr9	37464171	37467892
chr9	45350289	45354192
chr9	66492699	66495836
chr9	67291456	67293732
chr9	68725007	68727839
chr9	69060874	69066133
chr9	69177112	69182855
chr9	69195107	69198839
chr9	70147979	70154774
chr9	70401374	70405608
chr9	70920203	70923752
chr9	73026663	73029892
chr9	79629160	79638180
chr9	79790423	79792723
chr9	80235662	80239640
chr9	84440361	84441997
chr9	96432270	96435185
chr9	96707553	96717473
chr9	96717672	96726458
chr9	100609733	100617280
chr9	100619325	100621431
chr9	115829365	115832647
chr9	115844314	115850705
chr9	118916669	118919965
chr9	124644676	124648443
chr9	124974193	124986714
chr9	124987021	124995667
chr9	126759358	126765515
chr9	126765918	126772291
chr9	126772610	126774455
chr9	127530984	127534724
chr9	129370077	129376216
chr9	129376411	129390746
chr9	129485779	129488709
chr9	130533086	130536663
chr9	133027313	133030867
chr9	135036290	135040648
chr9	135452954	135459275
chr9	135459830	135466946
chr9	136240526	136244116
chr9	136756462	136759668
chr9	139087730	139093864
chr9	139094030	139097259
chr9	139685049	139688326
chr9	140674390	140677460
chr9	140777185	140783815
chrX	9379584	9382126
chrX	25024353	25031517
chrX	25032357	25035556
chrX	40943424	40945056
chrX	71525309	71528893
chrX	119123259	119130456
chrX	119132377	119135632
chrX	125606476	125607250
chrY	541407	544757

## Sheet: DIPG04 SUZ12
Chromosome	Start position	End position
chr1	819461	826628
chr1	829320	835113
chr1	6473964	6484808
chr1	6505751	6513094
chr1	16838193	16841733
chr1	16991186	16994293
chr1	17066062	17069247
chr1	17218353	17224829
chr1	18953059	18976205
chr1	20875649	20884024
chr1	22533753	22540548
chr1	22720641	22727341
chr1	22883213	22889912
chr1	22941339	22947138
chr1	25250914	25256582
chr1	26737154	26743077
chr1	29135934	29144154
chr1	38091195	38104749
chr1	40153889	40161859
chr1	44859527	44896013
chr1	47686432	47702415
chr1	47897752	47916532
chr1	50877745	50898955
chr1	63781286	63803776
chr1	70031403	70036253
chr1	75593701	75603846
chr1	82266494	82270759
chr1	82413298	82421131
chr1	85462175	85465932
chr1	85510685	85517528
chr1	85665100	85669428
chr1	85985569	85991615
chr1	85996108	86002612
chr1	90569780	90576599
chr1	91169365	91208037
chr1	91295660	91312844
chr1	92937654	92956782
chr1	108749821	108756431
chr1	109653167	109658348
chr1	110000065	110019595
chr1	110022275	110027249
chr1	110607252	110620047
chr1	110990833	110994835
chr1	111145003	111153195
chr1	114694051	114699192
chr1	119514533	119552337
chr1	121134220	121142150
chr1	143911512	143914777
chr1	145967849	145973307
chr1	146543759	146557947
chr1	147509588	147516128
chr1	148547761	148553206
chr1	148668507	148675213
chr1	148823477	148831651
chr1	148850625	148878035
chr1	148881011	148894317
chr1	148898501	148924291
chr1	148925611	148929750
chr1	149222492	149225672
chr1	151767523	151773311
chr1	152024356	152027927
chr1	152079671	152084956
chr1	153231938	153237401
chr1	154460250	154496460
chr1	154627332	154633432
chr1	154944558	154948977
chr1	156385073	156415199
chr1	156593955	156616692
chr1	156888913	156894058
chr1	158146227	158154678
chr1	159137543	159144536
chr1	160036623	160041892
chr1	162038085	162043705
chr1	165319113	165329911
chr1	177137019	177143184
chr1	180190682	180213901
chr1	183384019	183388637
chr1	197871190	197893350
chr1	197894957	197900940
chr1	199997035	200015815
chr1	202610157	202623227
chr1	202654968	202660611
chr1	202672479	202683055
chr1	202943194	202952641
chr1	205390321	205395480
chr1	205422415	205429580
chr1	205535807	205541930
chr1	207626041	207632116
chr1	210110330	210116418
chr1	212775046	212782569
chr1	218335956	218340550
chr1	234915620	234921864
chr10	5393627	5399219
chr10	5402000	5410099
chr10	6607495	6617878
chr10	7704087	7708937
chr10	8077009	8093658
chr10	14213065	14217987
chr10	22628429	22638862
chr10	23482216	23487693
chr10	35978142	35992684
chr10	36010464	36015607
chr10	36209735	36218654
chr10	42673527	42677526
chr10	50817667	50827550
chr10	71326456	71337321
chr10	71809440	71818388
chr10	81660488	81668799
chr10	94445844	94453202
chr10	94457208	94461960
chr10	94829572	94837132
chr10	99731866	99738684
chr10	99787030	99790679
chr10	100990872	100999311
chr10	101276404	101303161
chr10	102238120	102245438
chr10	102412039	102424145
chr10	102441655	102450151
chr10	102482006	102531747
chr10	102571156	102578269
chr10	102582243	102591963
chr10	102878701	102913371
chr10	102968003	102998557
chr10	103005935	103010636
chr10	105252393	105257616
chr10	115998532	116005688
chr10	118888093	118901626
chr10	118915845	118933856
chr10	119289686	119311957
chr10	124892064	124913201
chr10	126136256	126143087
chr10	127155353	127162770
chr10	135144378	135149679
chr10	135458626	135463314
chr11	2157132	2168776
chr11	3473796	3479214
chr11	13028601	13036364
chr11	17737944	17744620
chr11	19364893	19372705
chr11	20177164	20190056
chr11	20617830	20625024
chr11	31817141	31854335
chr11	32437976	32464663
chr11	32465898	32474276
chr11	33887362	33893254
chr11	35433021	35453894
chr11	43594801	43606283
chr11	44322293	44363473
chr11	60980700	60990479
chr11	60995390	61008007
chr11	66495879	66502290
chr11	69514337	69519986
chr11	69583328	69593181
chr11	69630162	69633929
chr11	100995606	101002721
chr11	107459344	107465996
chr11	117665191	117672379
chr11	118132913	118140028
chr11	122843681	122857892
chr11	123224799	123233566
chr11	124706613	124719109
chr11	124734317	124738835
chr11	128548942	128568872
chr11	129231976	129258601
chr11	129259721	129267937
chr12	160106	164588
chr12	180632	186888
chr12	2840827	2848105
chr12	2891046	2895112
chr12	3599808	3604843
chr12	4372684	4387045
chr12	5536495	5545760
chr12	48392019	48414707
chr12	48569649	48581526
chr12	49370863	49375275
chr12	54139356	54163073
chr12	54199497	54205982
chr12	54305223	54452888
chr12	54517671	54523672
chr12	54565185	54573397
chr12	54587050	54602872
chr12	58128771	58136208
chr12	58155802	58161953
chr12	62581507	62587423
chr12	65171550	65179950
chr12	65214780	65221610
chr12	69719720	69727495
chr12	71831971	71837626
chr12	71838742	71846803
chr12	72662778	72669323
chr12	85669046	85678057
chr12	93960804	93987371
chr12	94542969	94547222
chr12	106975009	106985031
chr12	108236031	108241359
chr12	109740786	109755824
chr12	113899023	113919619
chr12	114832835	114854710
chr12	115099413	115138852
chr12	132954685	132964072
chr13	22242030	22249495
chr13	25742248	25747074
chr13	28359607	28371648
chr13	28490611	28506473
chr13	28525158	28559647
chr13	29062587	29073484
chr13	29102119	29109241
chr13	37247857	37252757
chr13	46421609	46429073
chr13	52580562	52587286
chr13	100306911	100330839
chr13	100333549	100347947
chr13	100353894	100362741
chr13	100373865	100378428
chr13	100382709	100388625
chr13	100390526	100396217
chr13	100479278	100485230
chr13	100493057	100499868
chr13	100505468	100525799
chr13	100526898	100530816
chr13	100540479	100554454
chr13	100563824	100568252
chr13	100576268	100582145
chr13	100595831	100650493
chr13	102567073	102573826
chr13	110076473	110076727
chr13	112723011	112727616
chr14	21406680	21413148
chr14	22001166	22006071
chr14	23723075	23734947
chr14	29223268	29236285
chr14	29241451	29256099
chr14	31342215	31346285
chr14	32953064	32954323
chr14	35999191	36005264
chr14	36966517	36998299
chr14	37116784	37139606
chr14	37142006	37146947
chr14	38047576	38075026
chr14	54411239	54433501
chr14	57257784	57287492
chr14	60950271	60954434
chr14	60971782	60986105
chr14	61104673	61121991
chr14	65308479	65317429
chr14	65330050	65337396
chr14	65343314	65354000
chr14	65363540	65369897
chr14	70653873	70658487
chr14	74703290	74713226
chr14	74861438	74867698
chr14	74903282	74910263
chr14	76600823	76606931
chr14	76841382	76849402
chr14	94637604	94646289
chr14	95228287	95242874
chr15	29859744	29867106
chr15	30480694	30489916
chr15	32634500	32641717
chr15	34803690	34809534
chr15	34999453	35008643
chr15	35038511	35055464
chr15	45402155	45408743
chr15	45659854	45677522
chr15	50471805	50477870
chr15	51971679	51984478
chr15	52037004	52049125
chr15	53064035	53101026
chr15	56030311	56037127
chr15	58353994	58361931
chr15	60282048	60305171
chr15	60450650	60455512
chr15	60495332	60501887
chr15	68112816	68117730
chr15	72950658	72957182
chr15	73654569	73661869
chr15	74361040	74366515
chr15	74419001	74424382
chr15	75537721	75547269
chr15	75559292	75567745
chr15	75592853	75603047
chr15	76348432	76359821
chr15	76627020	76638327
chr15	78111604	78115269
chr15	78630438	78637524
chr15	78910116	78916605
chr15	80541145	80546176
chr15	80694667	80700014
chr15	89146484	89153838
chr15	89897495	89919430
chr15	89922837	89932504
chr15	89940935	89946636
chr15	89955278	89959151
chr15	91640879	91648213
chr15	96948240	96962562
chr15	99080632	99087723
chr15	99109711	99121063
chr15	99123504	99137799
chr16	1031985	1034827
chr16	1936247	1943987
chr16	3082917	3099949
chr16	73646062	73651360
chr16	86229430	86235634
chr16	86320582	86328102
chr16	86522551	86552133
chr16	90182510	90184906
chr17	30593489	30597061
chr17	32905150	32912795
chr17	33770106	33783936
chr17	33800847	33853100
chr17	33869691	33887927
chr17	34995631	35000071
chr17	35080286	35085896
chr17	35283919	35307813
chr17	36007290	36015024
chr17	36101377	36109726
chr17	37745710	37768536
chr17	37933632	37939757
chr17	37958122	37964736
chr17	38013213	38024310
chr17	38817917	38825852
chr17	38827154	38835969
chr17	38850757	38857975
chr17	38960823	38966767
chr17	39887942	39895039
chr17	41399125	41401584
chr17	43856551	43868572
chr17	45808458	45813800
chr17	45866096	45869623
chr17	45922391	45936070
chr17	46212980	46234315
chr17	46241598	46250111
chr17	46252152	46261290
chr17	46296531	46305503
chr17	46359186	46365066
chr17	46370434	46375922
chr17	46387850	46394742
chr17	46403300	46421128
chr17	46424369	46434314
chr17	46436528	46444884
chr17	46458036	46468086
chr17	46471588	46478926
chr17	46485909	46496018
chr17	46500331	46517423
chr17	46522794	46532348
chr17	46644458	46728832
chr17	46745915	46750749
chr17	46780437	46787602
chr17	46790842	46837187
chr17	47061374	47094920
chr17	48037726	48053238
chr17	48067676	48080522
chr17	51183093	51184065
chr17	56229344	56237646
chr17	56311447	56319367
chr17	66189978	66199503
chr17	72643806	72649605
chr17	77770358	77783214
chr17	77813238	77817684
chr18	904100	909762
chr18	19740752	19756922
chr18	19762018	19782427
chr18	55093059	55113252
chr18	56930112	56944956
chr18	56946043	56951740
chr18	76773251	76777282
chr19	1490245	1491178
chr19	1746501	1764378
chr19	18717788	18725790
chr19	18897992	18903385
chr19	40003011	40007508
chr19	42415031	42419107
chr19	42430534	42436677
chr19	47522160	47528047
chr19	48425694	48434616
chr19	49921547	49930808
chr19	49937894	49942809
chr19	51160649	51162371
chr2	20859102	20873179
chr2	27066672	27072651
chr2	27131722	27137452
chr2	27483223	27489130
chr2	39891209	39899781
chr2	45028468	45038104
chr2	45103171	45109113
chr2	45145861	45176164
chr2	60760064	60787006
chr2	60792322	60798148
chr2	71111585	71137084
chr2	73124506	73129911
chr2	73131322	73157790
chr2	73516118	73524105
chr2	88124411	88124868
chr2	88748085	88751778
chr2	90410066	90417316
chr2	90440455	90460823
chr2	91631289	91638879
chr2	91663134	91683017
chr2	91790285	91795825
chr2	91799874	91806581
chr2	91846605	91857256
chr2	91866912	91872533
chr2	91877766	91916809
chr2	91990761	92005223
chr2	92227869	92234535
chr2	96133012	96148862
chr2	96165434	96173180
chr2	96258320	96263922
chr2	96266074	96272212
chr2	96277036	96285456
chr2	97673067	97678701
chr2	97683230	97695506
chr2	97704535	97710785
chr2	98961522	98966936
chr2	110511206	110525019
chr2	111362959	111372270
chr2	113784572	113793090
chr2	114259120	114264109
chr2	114296157	114302041
chr2	118980064	118983982
chr2	119598727	119618287
chr2	119911782	119918871
chr2	132767288	132772458
chr2	136872258	136878645
chr2	152949229	152958676
chr2	162269599	162288284
chr2	162293253	162305536
chr2	170214278	170223675
chr2	171216334	171221985
chr2	171562169	171575884
chr2	171626042	171630786
chr2	171667405	171685032
chr2	173594279	173603880
chr2	175173962	175210312
chr2	175593148	175604318
chr2	175865345	175878771
chr2	176922986	176996037
chr2	180719499	180736689
chr2	182542108	182552983
chr2	200330512	200337774
chr2	200661901	200668894
chr2	200707646	200722577
chr2	200723575	200734885
chr2	207113411	207138287
chr2	207304439	207308319
chr2	219724557	219727267
chr2	219823619	219829697
chr2	219845487	219862380
chr2	219904552	219911122
chr2	219919977	219929735
chr2	223153041	223179057
chr2	232687231	232705937
chr2	233213659	233219158
chr2	233250068	233262378
chr2	233282150	233290110
chr2	237071194	237083958
chr2	241759064	241762914
chr20	1193120	1200030
chr20	1206476	1217355
chr20	1221919	1228059
chr20	1971349	1978567
chr20	2674061	2678082
chr20	2779002	2786087
chr20	18030630	18041150
chr20	21075721	21090498
chr20	21488932	21497201
chr20	21498898	21506045
chr20	21686523	21690679
chr20	21691839	21699615
chr20	25060899	25066992
chr20	30547817	30555796
chr20	30602067	30605923
chr20	30606991	30614616
chr20	30618706	30624736
chr20	30636278	30643105
chr20	30644288	30649121
chr20	34889603	34894041
chr20	36224907	36231754
chr20	37345405	37364247
chr20	44637202	44643651
chr20	44654211	44664166
chr20	44926492	44944284
chr20	47131169	47132964
chr20	47931749	47937706
chr20	55832726	55839965
chr20	57412827	57420776
chr20	61046465	61055160
chr20	61606212	61613498
chr20	61633372	61644837
chr20	61804436	61810150
chr20	61882466	61886034
chr20	62790836	62802188
chr20	62950409	62963742
chr21	10131623	10144766
chr21	11012380	11019160
chr21	34323340	34333113
chr21	34347740	34353918
chr21	34393373	34405123
chr21	34430154	34447913
chr21	34479024	34492159
chr21	38060605	38091873
chr21	46124577	46135694
chr22	17850328	17854787
chr22	25674787	25683590
chr22	25814619	25819106
chr22	37089225	37105795
chr22	37210079	37214931
chr22	51080823	51084208
chr3	11034586	11044600
chr3	11077859	11083202
chr3	11178230	11179678
chr3	12046299	12050781
chr3	27752821	27775052
chr3	32859090	32864273
chr3	42301713	42309425
chr3	45833376	45842639
chr3	50713845	50718504
chr3	62340871	62370226
chr3	62375494	62382985
chr3	62410529	62423254
chr3	62522952	62527497
chr3	71799239	71802643
chr3	71803841	71809861
chr3	71820689	71838744
chr3	71842177	71849581
chr3	90488426	90495501
chr3	122742624	122749286
chr3	123707754	123714161
chr3	123749932	123755142
chr3	137480231	137491414
chr3	138652550	138679275
chr3	140765273	140774972
chr3	147067105	147144657
chr3	156007518	156012260
chr3	157797952	157804163
chr3	157805752	157810382
chr3	157811554	157829252
chr3	164910389	164915642
chr3	172165878	172170597
chr3	183944281	183951606
chr3	184190055	184197020
chr3	184204220	184210595
chr3	184222845	184247135
chr3	184864394	184874417
chr3	195198785	195233855
chr3	197783938	197849126
chr3	197857475	197862663
chr3	197894309	197896459
chr4	4225598	4231976
chr4	4854039	4874250
chr4	13525775	13550775
chr4	16082089	16087164
chr4	94745857	94752071
chr4	106816403	106821438
chr4	107954249	107959278
chr4	109064310	109070969
chr4	109078347	109095928
chr4	111531323	111567453
chr4	113066720	113070897
chr4	113420834	113445200
chr4	113623542	113628654
chr4	141486708	141494007
chr4	141496425	141503268
chr4	147554073	147564949
chr4	149361400	149366348
chr4	174436600	174466935
chr4	175116520	175121035
chr4	175125976	175144279
chr4	175146203	175152173
chr4	185933415	185937782
chr4	185940845	185948075
chr4	189971355	189973655
chr4	190935040	190954276
chr4	190966776	190972107
chr4	190985277	191002124
chr4	191004059	191016929
chr5	42941025	42947065
chr5	42948980	42958812
chr5	42990747	43003311
chr5	50258588	50267765
chr5	50671748	50696633
chr5	54466546	54495269
chr5	54508204	54535778
chr5	70740948	70744218
chr5	70745430	70750277
chr5	72508540	72522960
chr5	72583802	72603492
chr5	72604588	72610640
chr5	72710650	72725296
chr5	72730993	72742862
chr5	72744370	72751017
chr5	76920232	76946644
chr5	77138066	77148324
chr5	79329126	79334182
chr5	79854292	79861546
chr5	93904636	93906622
chr5	94618221	94625990
chr5	99381488	99386084
chr5	110405212	110409436
chr5	114512372	114518856
chr5	122415421	122438378
chr5	132943891	132947851
chr5	134373002	134378589
chr5	134867002	134873256
chr5	135229593	135238422
chr5	135241948	135253085
chr5	135264123	135268846
chr5	135270600	135275224
chr5	137573513	137581651
chr5	141253483	141264859
chr5	145710470	145729922
chr5	145807529	145817293
chr5	153851710	153876996
chr5	170730732	170762525
chr5	172652207	172686392
chr5	174142764	174163905
chr5	180537070	180545850
chr6	388201	398151
chr6	729345	736138
chr6	791125	803435
chr6	1306843	1317043
chr6	1372891	1400454
chr6	7537454	7562407
chr6	7722939	7731958
chr6	10382351	10426027
chr6	10882280	10890431
chr6	11020382	11029611
chr6	11034794	11050534
chr6	26719833	26725409
chr6	26773285	26782438
chr6	28730702	28748622
chr6	28752961	28757133
chr6	28775460	28786299
chr6	30324209	30328537
chr6	30404909	30415653
chr6	30427157	30436088
chr6	30446892	30450754
chr6	31198846	31204084
chr6	31331338	31338656
chr6	32369038	32376479
chr6	32763829	32768887
chr6	41335202	41340860
chr6	44256812	44267275
chr6	44287570	44299526
chr6	44307817	44312544
chr6	46699316	46705327
chr6	50677721	50685568
chr6	50786013	50796843
chr6	50808858	50815024
chr6	58144385	58150553
chr6	58177568	58183462
chr6	85461866	85473502
chr6	85475720	85488692
chr6	100025494	100069115
chr6	100893439	100908284
chr6	100909889	100916500
chr6	106543293	106548173
chr6	108429429	108439697
chr6	108441250	108462463
chr6	108473844	108503198
chr6	108506446	108511959
chr6	117584392	117593357
chr6	126066100	126074054
chr6	134172298	134179048
chr6	134207577	134220120
chr6	134227015	134231467
chr6	137804583	137820955
chr6	137833473	137842103
chr6	138477873	138486232
chr6	143994755	144002247
chr6	144064038	144071485
chr6	144381623	144389236
chr6	150250453	150266137
chr6	150271092	150291037
chr6	150296382	150321311
chr6	150327502	150339065
chr6	150354294	150362166
chr6	150460923	150467040
chr6	152127759	152139031
chr6	170598757	170605982
chr7	326210	334111
chr7	1221649	1227555
chr7	1249712	1253184
chr7	1262499	1291897
chr7	19143657	19153041
chr7	19156817	19161111
chr7	19180918	19186749
chr7	20814519	20836551
chr7	25891197	25902857
chr7	26888015	26892211
chr7	26896010	26900407
chr7	27164935	27250398
chr7	27276740	27291048
chr7	29602751	29609774
chr7	35286467	35305921
chr7	43150520	43154921
chr7	65110563	65116033
chr7	93201534	93206725
chr7	96616039	96659881
chr7	97359036	97366695
chr7	100608518	100612729
chr7	116960278	116967196
chr7	121937323	121957743
chr7	127818610	127825258
chr7	128000536	128007752
chr7	129418997	129424066
chr7	130424990	130433417
chr7	140773018	140777059
chr7	142372272	142375857
chr7	143060071	143063911
chr7	150861038	150870415
chr7	155163834	155177898
chr7	155230135	155271232
chr7	155289723	155306503
chr7	155600393	155607661
chr7	156788869	156818928
chr8	9757746	9772299
chr8	10588199	10593708
chr8	11496955	11502336
chr8	11527560	11592695
chr8	19793611	19797916
chr8	23537681	23542824
chr8	23551238	23574600
chr8	24771900	24775333
chr8	24809419	24822592
chr8	25894723	25912228
chr8	41164525	41169214
chr8	41748404	41754322
chr8	53849984	53856200
chr8	55353237	55363048
chr8	55363977	55389482
chr8	65489256	65496665
chr8	67873791	67883250
chr8	70980195	70988273
chr8	77583815	77595577
chr8	86570302	86576352
chr8	86749498	86757776
chr8	86767274	86776148
chr8	95650235	95657123
chr8	99955820	99971482
chr8	132049313	132057458
chr8	144508236	144512170
chr9	962468	979794
chr9	16624022	16629325
chr9	37008233	37014909
chr9	37016005	37022085
chr9	37024767	37048826
chr9	42744004	42748199
chr9	68423370	68427765
chr9	68995843	69002769
chr9	69177132	69181995
chr9	69194935	69199231
chr9	70150673	70154690
chr9	70920203	70923661
chr9	71940458	71946048
chr9	79626580	79644929
chr9	95556393	95564768
chr9	95566938	95574303
chr9	95578177	95584516
chr9	96707220	96726375
chr9	100603082	100626975
chr9	100691076	100699962
chr9	124102323	124115450
chr9	124127926	124152268
chr9	124972386	124998144
chr9	126751301	126798762
chr9	129368319	129395388
chr9	133531462	133543249
chr9	135037438	135041514
chr9	135286204	135295041
chr9	135298547	135303858
chr9	135449745	135467717
chr9	136146786	136151228
chr9	136475759	136481853
chr9	139083692	139097506
chr9	141121129	141124039
chrX	25022271	25043563
chrX	53346298	53350534
chrX	53353377	53360393
chrX	55207660	55209283
chrX	71520253	71530401
chrX	119122181	119137280
chrX	125606465	125607245
chrX	136113462	136118843
chrX	139584217	139590107

[truncated: 2 more sheets: DIPG13 MTF2, DIPG04 MTF2]
