# Supplementary material for: Histone deposition pathways determine the chromatin landscapes of H3.1 and H3.3 K27M oncohistones
Source: bioRxiv preprint, doi:10.1101/2020.05.18.101709, version 3 (2020-09-08)
Supplement: Table 2 [file 101709_file04.xlsx]

## Sheet: Sheet1
SU-DIPG-XIII	SU-DIPG-XVII
GeneID	GeneID
A2M	A2M
A4GALT	A2ML1
AAAS	AACS
AADAC	AADAC
AAED1	AADACL2
AAK1	AAED1
AAMDC	AAGAB
AARD	AAK1
AARS	AAMDC
AASDH	AASDHPPT
AASDHPPT	AASS
AASS	AATF
AATF	ABAT
ABAT	ABCA1
ABCA12	ABCA12
ABCA13	ABCA13
ABCA7	ABCA8
ABCB1	ABCA9
ABCB10	ABCB1
ABCB4	ABCB10
ABCB6	ABCB11
ABCB9	ABCB4
ABCC12	ABCB6
ABCC3	ABCB9
ABCC6	ABCC3
ABCD2	ABCC4
ABCD3	ABCC5
ABCD4	ABCD2
ABCE1	ABCD3
ABHD12	ABCD4
ABHD12B	ABCE1
ABHD14A	ABCF3
ABHD14A-ACY1	ABCG5
ABHD14B	ABHD12
ABHD15	ABHD13
ABHD17B	ABHD17B
ABHD17C	ABHD17C
ABHD2	ABHD2
ABHD3	ABHD3
ABHD6	ABHD4
ABI1	ABI1
ABI3BP	ABI2
ABL1	ABI3BP
ABL2	ABL1
ABLIM1	ABL2
ABLIM2	ABLIM1
ABR	ABLIM2
ABRA	ABRA
ABT1	ABTB2
ABTB2	AC001226.2
AC001226.2	AC002429.2
AC002429.2	AC004223.3
AC002985.1	AC004805.1
AC003002.1	AC004832.3
AC003002.2	AC004922.1
AC003002.4	AC005154.6
AC004223.3	AC005258.1
AC004832.3	AC005520.1
AC004922.1	AC005670.2
AC005154.6	AC005702.2
AC005258.1	AC006486.1
AC005324.3	AC006978.2
AC005702.2	AC007240.1
AC005726.2	AC007375.2
AC005832.4	AC008695.1
AC005837.2	AC008758.1
AC005943.1	AC008764.1
AC006486.1	AC008764.4
AC006978.2	AC008982.1
AC007192.1	AC009119.2
AC007375.2	AC009336.2
AC008073.3	AC009690.1
AC008560.1	AC009779.3
AC008575.1	AC010255.3
AC008695.1	AC010422.6
AC008758.1	AC010487.3
AC008758.4	AC011195.2
AC008758.5	AC013394.1
AC008758.6	AC015813.2
AC008764.1	AC017083.4
AC008770.2	AC018512.1
AC008770.3	AC018523.2
AC008878.3	AC018630.6
AC008982.1	AC018709.1
AC009119.2	AC019117.3
AC009133.6	AC020636.2
AC009163.4	AC022826.2
AC009336.2	AC023055.1
AC010132.3	AC023509.3
AC010255.3	AC024592.3
AC010422.6	AC024940.1
AC010463.1	AC026954.2
AC010487.3	AC034102.2
AC010522.1	AC036214.3
AC012184.2	AC037459.1
AC012254.2	AC046185.1
AC013394.1	AC058822.1
AC015813.2	AC068547.1
AC017083.4	AC068790.8
AC018523.2	AC068896.1
AC018630.6	AC068946.1
AC018709.1	AC069257.3
AC019117.3	AC069503.2
AC020915.1	AC072022.1
AC020915.2	AC073111.3
AC020915.6	AC073111.5
AC022826.2	AC073612.1
AC023055.1	AC073896.1
AC023509.3	AC078927.1
AC024940.1	AC079594.2
AC025263.2	AC083902.2
AC025283.2	AC087632.1
AC026398.1	AC090004.1
AC026464.4	AC091167.7
AC026786.1	AC092042.3
AC034102.2	AC092821.1
AC036214.3	AC093155.3
AC058822.1	AC093423.3
AC068234.1	AC093899.2
AC068547.1	AC097372.1
AC068775.2	AC097662.2
AC068790.8	AC098650.1
AC068896.1	AC099489.1
AC068946.1	AC099518.3
AC069257.3	AC099811.2
AC069544.2	AC104151.1
AC072022.1	AC104304.1
AC073610.3	AC104532.1
AC073612.1	AC104662.2
AC073896.1	AC105001.2
AC078927.1	AC105052.1
AC079447.1	AC106886.5
AC079594.2	AC107871.1
AC087632.1	AC110275.1
AC090004.1	AC117457.1
AC090360.1	AC119674.2
AC090527.2	AC131160.1
AC091167.3	AC134669.2
AC091167.7	AC134772.2
AC091167.8	AC135178.2
AC091551.1	AC135586.2
AC091959.3	AC138811.2
AC092042.3	AC140504.1
AC092329.3	AC243547.3
AC092587.1	ACACA
AC092718.3	ACACB
AC092718.8	ACAD11
AC093155.3	ACAD8
AC093227.3	ACADL
AC093423.3	ACADM
AC096887.1	ACAN
AC097372.1	ACAP2
AC097662.2	ACAT1
AC098650.1	ACAT2
AC099329.3	ACBD6
AC099489.1	ACBD7
AC099518.3	ACER3
AC104109.3	ACIN1
AC104151.1	ACKR3
AC104304.1	ACLY
AC104581.1	ACO1
AC104662.2	ACO2
AC110275.1	ACOD1
AC116366.3	ACOT11
AC116565.1	ACOT13
AC117457.1	ACOT7
AC119674.2	ACOX1
AC124312.1	ACOX3
AC129492.3	ACOXL
AC134669.2	ACP6
AC135178.2	ACSBG1
AC135586.2	ACSF2
AC138811.2	ACSL1
AC140504.1	ACSL3
AC243547.3	ACSL4
AC245748.1	ACSS1
ACACA	ACSS2
ACACB	ACSS3
ACAD11	ACTA2
ACAD8	ACTC1
ACADM	ACTG1
ACAN	ACTG2
ACAP2	ACTL6A
ACAT1	ACTN1
ACBD5	ACTN2
ACBD6	ACTN4
ACBD7	ACTR3
ACER3	ACTR3B
ACIN1	ACTR3C
ACKR2	ACTRT3
ACKR3	ACVR1
ACLY	ACVR1B
ACO1	ACVR1C
ACO2	ACVR2A
ACOD1	ACYP2
ACOT13	ADAM10
ACOT7	ADAM12
ACOT8	ADAM15
ACOXL	ADAM17
ACP6	ADAM22
ACSBG1	ADAM23
ACSF2	ADAM7
ACSL1	ADAM9
ACSL3	ADAMTS1
ACSL6	ADAMTS12
ACSS1	ADAMTS16
ACSS2	ADAMTS17
ACSS3	ADAMTS18
ACTB	ADAMTS20
ACTG1	ADAMTS3
ACTL6A	ADAMTS4
ACTN2	ADAMTS5
ACTN4	ADAMTS6
ACTR2	ADAMTS9
ACTR3	ADAMTSL1
ACTR3C	ADAMTSL3
ACTR6	ADAMTSL4
ACVR1	ADAP1
ACVR1B	ADAR
ACVR2A	ADARB1
ACY3	ADARB2
ACYP2	ADAT1
AD000671.2	ADCK5
ADA	ADCY1
ADAM10	ADCY10
ADAM12	ADCY2
ADAM15	ADCY8
ADAM17	ADCY9
ADAM19	ADD1
ADAM22	ADD2
ADAM23	ADD3
ADAM29	ADGRA3
ADAM9	ADGRB3
ADAMTS1	ADGRE5
ADAMTS16	ADGRF1
ADAMTS17	ADGRF2
ADAMTS20	ADGRF3
ADAMTS3	ADGRG1
ADAMTS5	ADGRG3
ADAMTS6	ADGRG6
ADAMTSL1	ADGRL2
ADAMTSL3	ADGRL3
ADAMTSL4	ADGRV1
ADARB1	ADH5
ADARB2	ADH6
ADAT1	ADHFE1
ADAT2	ADIPOQ
ADCK1	ADIPOR1
ADCY1	ADIPOR2
ADCY10	ADK
ADCY2	ADM
ADCY9	ADNP2
ADCYAP1R1	ADORA1
ADD1	ADORA2B
ADD2	ADSL
ADD3	ADSS
ADGRA3	ADSSL1
ADGRB3	ADTRP
ADGRE5	AEBP2
ADGRF1	AF130351.1
ADGRF3	AF241726.2
ADGRG1	AFAP1
ADGRG3	AFAP1L2
ADGRG6	AFDN
ADGRL2	AFF1
ADGRL3	AFF3
ADGRV1	AFG1L
ADH5	AFP
ADHFE1	AFTPH
ADIPOR2	AGAP1
ADK	AGAP3
ADM	AGBL1
ADNP2	AGBL2
ADORA1	AGBL4
ADORA2A	AGFG1
ADRB1	AGFG2
ADRM1	AGK
ADSL	AGL
ADSS	AGMO
AEBP2	AGO1
AEN	AGO2
AF130351.1	AGO3
AFAP1	AGO4
AFAP1L1	AGPAT1
AFAP1L2	AGPAT3
AFDN	AGPAT4
AFF1	AGPAT5
AFF3	AGPS
AFG1L	AGR2
AFG3L2	AGTPBP1
AGA	AHCYL1
AGAP1	AHCYL2
AGBL1	AHI1
AGBL4	AHNAK
AGFG1	AHR
AGL	AHSA1
AGMO	AIF1L
AGO2	AIMP2
AGO3	AJUBA
AGPAT1	AK2
AGPAT4	AK4
AGPAT5	AKAP12
AGPS	AKAP13
AGTPBP1	AKAP2
AHCYL2	AKAP5
AHI1	AKAP6
AHR	AKAP7
AHRR	AKAP8L
AIDA	AKAP9
AIFM1	AKIRIN2
AIMP1	AKNAD1
AJAP1	AKR1A1
AK2	AKR1B1
AK3	AKR1C2
AK4	AKR1C3
AK8	AKR1D1
AK9	AKR1E2
AKAP1	AKT3
AKAP11	AL020996.2
AKAP12	AL022238.4
AKAP13	AL033529.1
AKAP2	AL049779.1
AKAP3	AL049844.3
AKAP5	AL080251.1
AKAP6	AL109811.4
AKAP7	AL121594.3
AKAP8L	AL132671.2
AKAP9	AL132780.3
AKIRIN2	AL138694.1
AKNA	AL138752.2
AKNAD1	AL139011.2
AKR1D1	AL139300.1
AKR1E2	AL139353.1
AKT1S1	AL162231.3
AKT3	AL163636.2
AL022238.4	AL355916.3
AL031708.1	AL355987.3
AL049650.1	AL358075.4
AL049697.1	AL359736.1
AL049839.2	AL365214.3
AL121594.3	AL365232.1
AL121758.1	AL449266.1
AL132671.2	AL512506.3
AL132780.3	AL513165.2
AL136531.2	AL513523.10
AL138752.2	AL589666.1
AL139300.1	AL591806.3
AL139353.1	AL603832.3
AL159163.1	AL691442.1
AL163195.3	AL713999.1
AL163636.2	ALB
AL353588.1	ALCAM
AL355916.3	ALDH1A1
AL358075.4	ALDH1A2
AL359736.1	ALDH1A3
AL359922.1	ALDH3A1
AL365214.3	ALDH3A2
AL365273.2	ALDH3B1
AL449266.1	ALDH4A1
AL513165.2	ALDH7A1
AL589666.1	ALDH9A1
AL603832.3	ALDOB
AL662899.3	ALG14
AL669918.1	ALG8
AL672142.1	ALG9
AL691442.1	ALK
ALCAM	ALKBH3
ALDH16A1	ALMS1
ALDH18A1	ALPK1
ALDH1A2	ALPK2
ALDH7A1	ALS2
ALDH9A1	ALS2CR12
ALDOA	ALX1
ALDOB	AMACR
ALG1L	AMBRA1
ALG9	AMMECR1
ALK	AMOTL1
ALKBH3	AMOTL2
ALKBH5	AMZ1
ALKBH7	ANAPC10
ALKBH8	ANAPC13
ALLC	ANAPC15
ALOX12	ANG
ALOX15	ANGEL1
ALOXE3	ANGPT1
ALPK1	ANGPT2
ALX1	ANGPTL1
AMACR	ANGPTL5
AMD1	ANK1
AMDHD1	ANK2
AMFR	ANK3
AMN1	ANKAR
AMOTL1	ANKDD1B
AMPH	ANKFN1
AMY1A	ANKFY1
AMZ1	ANKH
ANAPC10	ANKIB1
ANAPC15	ANKRD1
ANAPC16	ANKRD10
ANAPC4	ANKRD13C
ANAPC5	ANKRD17
ANG	ANKRD28
ANGEL2	ANKRD30BL
ANGPT1	ANKRD33B
ANGPT2	ANKRD34A
ANGPTL1	ANKRD44
ANGPTL2	ANKRD46
ANGPTL4	ANKRD50
ANGPTL5	ANKRD54
ANK2	ANKRD6
ANK3	ANKRD7
ANKDD1B	ANKS1A
ANKEF1	ANKS1B
ANKFN1	ANKS4B
ANKFY1	ANKUB1
ANKH	ANLN
ANKHD1	ANO1
ANKHD1-EIF4EBP3	ANO3
ANKIB1	ANO4
ANKMY2	ANO5
ANKRD11	ANO6
ANKRD12	ANO7
ANKRD13A	ANOS1
ANKRD13B	ANP32A
ANKRD13C	ANP32B
ANKRD17	ANP32E
ANKRD18B	ANTXR1
ANKRD20A4	ANXA1
ANKRD28	ANXA13
ANKRD30BL	ANXA2
ANKRD33B	ANXA2R
ANKRD34A	ANXA3
ANKRD37	ANXA4
ANKRD40	ANXA5
ANKRD42	AOAH
ANKRD44	AOX1
ANKRD46	AP000311.1
ANKRD49	AP000721.1
ANKRD50	AP001781.3
ANKRD54	AP001931.1
ANKRD55	AP002360.1
ANKRD6	AP002990.1
ANKRD60	AP003108.2
ANKRD65	AP003419.2
ANKS1A	AP1AR
ANKS1B	AP1B1
ANKUB1	AP1S3
ANLN	AP2A2
ANO10	AP2M1
ANO3	AP3B1
ANO6	AP3M1
ANO7	AP3M2
ANP32B	AP3S2
ANP32E	AP4S1
ANTXR1	APAF1
ANTXR2	APBA1
ANXA10	APBA2
ANXA2	APBB2
ANXA2R	APH1B
ANXA4	APLP2
ANXA6	APOD
AOAH	APOLD1
AP000311.1	APOO
AP001273.2	APOPT1
AP001781.3	APP
AP001931.1	APPBP2
AP002360.1	APPL1
AP002373.1	APPL2
AP002990.1	APTX
AP1AR	AQP11
AP1B1	AQP7
AP1G2	AQR
AP2A2	ARAP2
AP2S1	ARC
AP3B1	ARCN1
AP3M1	AREL1
AP3S1	ARF3
AP3S2	ARF4
AP4S1	ARF6
APAF1	ARFGAP3
APBA1	ARFGEF2
APBA2	ARFGEF3
APBB1IP	ARFIP1
APBB2	ARFIP2
APC	ARG2
APCDD1	ARHGAP1
APEX1	ARHGAP10
APEX2	ARHGAP11A
APH1B	ARHGAP12
APLP2	ARHGAP15
APMAP	ARHGAP17
APOBEC3H	ARHGAP18
APOD	ARHGAP19
APOF	ARHGAP19-SLIT1
APOLD1	ARHGAP22
APOO	ARHGAP23
APOPT1	ARHGAP24
APP	ARHGAP25
APPBP2	ARHGAP26
APPL1	ARHGAP28
APPL2	ARHGAP29
AQP11	ARHGAP31
AQP6	ARHGAP32
AQR	ARHGAP35
ARAP1	ARHGAP39
ARAP2	ARHGAP42
ARC	ARHGAP5
ARCN1	ARHGAP6
ARF3	ARHGDIB
ARF4	ARHGEF10
ARFGEF1	ARHGEF10L
ARFGEF2	ARHGEF11
ARFGEF3	ARHGEF12
ARFIP1	ARHGEF19
ARHGAP10	ARHGEF2
ARHGAP11A	ARHGEF26
ARHGAP11B	ARHGEF28
ARHGAP12	ARHGEF3
ARHGAP15	ARHGEF33
ARHGAP17	ARHGEF37
ARHGAP18	ARHGEF38
ARHGAP19	ARHGEF4
ARHGAP19-SLIT1	ARHGEF40
ARHGAP20	ARHGEF6
ARHGAP21	ARHGEF7
ARHGAP22	ARHGEF9
ARHGAP23	ARID1A
ARHGAP24	ARID1B
ARHGAP25	ARID2
ARHGAP26	ARID4A
ARHGAP28	ARID4B
ARHGAP31	ARID5A
ARHGAP32	ARID5B
ARHGAP35	ARIH1
ARHGAP39	ARIH2
ARHGAP42	ARL13B
ARHGAP5	ARL4A
ARHGAP8	ARL4C
ARHGDIB	ARL5A
ARHGEF10	ARL6IP1
ARHGEF10L	ARL6IP5
ARHGEF11	ARL6IP6
ARHGEF12	ARL8A
ARHGEF18	ARMC5
ARHGEF2	ARMC9
ARHGEF26	ARMT1
ARHGEF28	ARNT
ARHGEF3	ARNT2
ARHGEF33	ARNTL
ARHGEF37	ARNTL2
ARHGEF38	ARPC1A
ARHGEF4	ARPC2
ARHGEF40	ARPC5
ARHGEF6	ARRDC3
ARHGEF7	ARSE
ARHGEF9	ARSI
ARID1A	ARSJ
ARID1B	ART1
ARID2	ART3
ARID3B	ASAH1
ARID4A	ASAP1
ARID4B	ASAP2
ARID5B	ASB11
ARIH1	ASB13
ARIH2	ASB15
ARIH2OS	ASB18
ARL13B	ASB2
ARL15	ASB3
ARL17A	ASB4
ARL17B	ASB5
ARL2-SNX15	ASB8
ARL3	ASCC1
ARL4A	ASCL1
ARL4D	ASCL3
ARL5A	ASF1A
ARL6IP1	ASH1L
ARL6IP5	ASIC4
ARMC8	ASNS
ARMC9	ASPH
ARMCX5	ASPN
ARMT1	ASRGL1
ARNT	ASXL2
ARNT2	ASXL3
ARPC1A	ATAD2B
ARPC5	ATAD3C
ARPIN	ATF2
ARPP19	ATF3
ARPP21	ATF4
ARRB1	ATF6
ARRDC3	ATF7
ARSA	ATF7IP
ARSB	ATF7IP2
ARSG	ATG13
ARSI	ATG14
ARSJ	ATG16L2
ARSK	ATG2A
ART4	ATG2B
ARV1	ATG4A
ASAH1	ATG4C
ASAP1	ATG7
ASAP2	ATG9A
ASAP3	ATIC
ASB1	ATL1
ASB17	ATL2
ASB2	ATM
ASB3	ATN1
ASB4	ATOH8
ASB5	ATP10A
ASB8	ATP10B
ASCC1	ATP10D
ASCL1	ATP11A
ASF1A	ATP11B
ASH1L	ATP11C
ASH2L	ATP13A3
ASIC2	ATP13A4
ASNA1	ATP13A5
ASNS	ATP1A1
ASPH	ATP1B1
ASPHD1	ATP1B3
ASPHD2	ATP1B4
ASPM	ATP2B2
ASS1	ATP2B4
ASTN1	ATP2C1
ASTN2	ATP5B
ASXL1	ATP5C1
ASXL3	ATP5G2
ATAD1	ATP5J2-PTCD1
ATAD2B	ATP5S
ATCAY	ATP6V0A1
ATE1	ATP6V0A4
ATF4	ATP6V0D2
ATF6	ATP6V0E1
ATF7	ATP6V0E2
ATF7IP	ATP6V1B2
ATF7IP2	ATP6V1C1
ATG10	ATP6V1E2
ATG12	ATP6V1H
ATG16L2	ATP8A1
ATG2A	ATP8B2
ATG2B	ATP8B4
ATG4C	ATP9A
ATG7	ATP9B
ATG9A	ATPAF1
ATL1	ATPIF1
ATM	ATRIP
ATN1	ATRN
ATOH8	ATXN1
ATOX1	ATXN10
ATP10A	ATXN2
ATP10B	ATXN2L
ATP10D	ATXN3
ATP11A	ATXN7
ATP13A4	ATXN7L1
ATP13A5	ATXN7L3B
ATP1B1	AUH
ATP1B2	AUNIP
ATP1B3	AUTS2
ATP1B4	AVIL
ATP23	AVL9
ATP2A2	AVPI1
ATP2B1	AXIN1
ATP2B2	AXIN2
ATP2B4	AZIN1
ATP2C1	B3GALNT1
ATP2C2	B3GALNT2
ATP5A1	B3GALT1
ATP5B	B3GALT2
ATP5E	B3GALT5
ATP5G2	B3GNT5
ATP5J	B3GNTL1
ATP5S	B4GALNT3
ATP6AP1L	B4GALT1
ATP6V0A1	B4GALT5
ATP6V0A4	B4GALT6
ATP6V0D2	B9D1
ATP6V0E1	BAALC
ATP6V0E2	BABAM2
ATP6V1B2	BACE2
ATP6V1E2	BACH1
ATP6V1G2	BACH2
ATP6V1G2-DDX39B	BAG2
ATP7A	BAG4
ATP8A1	BAG5
ATP8B1	BAG6
ATP8B4	BAHD1
ATP9A	BAIAP2
ATP9B	BAMBI
ATPAF1	BANF2
ATPIF1	BANK1
ATR	BANP
ATRN	BARD1
ATRNL1	BATF3
ATXN1	BAZ1A
ATXN10	BAZ1B
ATXN1L	BAZ2A
ATXN2	BAZ2B
ATXN3	BBOF1
ATXN7	BBOX1
ATXN7L1	BBS12
ATXN7L3B	BBS2
AUH	BBS4
AURKB	BBS5
AUTS2	BBS7
AVEN	BBS9
AVL9	BBX
AXIN1	BCAN
AXL	BCAP29
AZI2	BCAR3
AZIN1	BCAS1
B2M	BCAS3
B3GALNT2	BCAT1
B3GALT2	BCDIN3D
B3GALT5	BCHE
B3GAT2	BCKDHB
B3GNT5	BCL11A
B3GNT6	BCL11B
B3GNTL1	BCL2
B4GALNT3	BCL2A1
B4GALT1	BCL2L1
B4GALT4	BCL2L11
B4GALT5	BCL2L13
B4GALT6	BCL2L14
B9D1	BCL6
BAALC	BCL7A
BABAM1	BCL7C
BACE1	BCL9
BACE2	BCL9L
BACH1	BCO1
BACH2	BCOR
BAD	BCR
BAG2	BDH2
BAG4	BECN1
BAG6	BEND3
BAIAP2L2	BEND5
BAMBI	BEND6
BANF1	BEND7
BANP	BEST3
BARD1	BEST4
BASP1	BET1L
BAZ1A	BFSP1
BAZ2A	BFSP2
BAZ2B	BHLHE40
BBC3	BHLHE41
BBIP1	BICC1
BBOX1	BICD1
BBS10	BICRAL
BBS4	BIN2
BBS7	BIN3
BBS9	BIRC2
BBX	BIRC3
BCAN	BIRC6
BCAP29	BLID
BCAR3	BLM
BCAS1	BLOC1S5
BCAS3	BLOC1S5-TXNDC5
BCAT1	BMF
BCDIN3D	BMP2K
BCHE	BMP5
BCKDHB	BMP7
BCL10	BMP8B
BCL11A	BMPER
BCL11B	BMPR1A
BCL2	BMPR1B
BCL2A1	BMPR2
BCL2L1	BMS1
BCL2L13	BMT2
BCL2L14	BMX
BCL2L2	BNC2
BCL2L2-PABPN1	BNIP1
BCL3	BNIP2
BCL6	BNIP3L
BCL7A	BOC
BCL7C	BOK
BCL9	BOLA1
BCL9L	BOLL
BCLAF1	BORCS5
BCO1	BPGM
BCOR	BPHL
BCR	BPTF
BDH1	BRAF
BDH2	BRAP
BECN1	BRCA1
BEND3	BRD2
BEND4	BRD4
BEND6	BRI3BP
BEST3	BRINP2
BFSP1	BRINP3
BFSP2	BRIP1
BHLHE40	BRMS1L
BHLHE41	BRWD1
BICC1	BTBD1
BICD1	BTBD16
BICDL1	BTBD3
BICRA	BTBD7
BICRAL	BTBD9
BIRC2	BTC
BIRC3	BTD
BIRC6	BTF3
BIRC7	BTG1
BLCAP	BTG2
BLID	BTG3
BLM	BTLA
BLOC1S4	BTN2A1
BLOC1S6	BTN3A1
BLZF1	BTN3A2
BMF	BTN3A3
BMI1	BUD13
BMP2	BZW1
BMP2K	BZW2
BMP5	C10orf126
BMP7	C10orf67
BMPER	C10orf90
BMPR1A	C11orf1
BMPR1B	C11orf16
BMPR2	C11orf24
BMT2	C11orf49
BMX	C11orf52
BNC2	C11orf53
BNIP2	C11orf57
BNIP3L	C11orf58
BOC	C11orf63
BOD1	C11orf65
BOLA1	C11orf71
BOLA2	C11orf95
BOLA2B	C12orf40
BOLA2-SMG1P6	C12orf42
BORCS5	C12orf49
BORCS6	C12orf56
BPGM	C12orf57
BPHL	C12orf60
BPI	C12orf65
BPIFB4	C12orf73
BPTF	C12orf75
BRAF	C14orf159
BRCA1	C14orf166
BRD1	C14orf28
BRD2	C14orf37
BRD4	C14orf79
BRI3BP	C14orf93
BRINP1	C15orf38-AP3S2
BRINP2	C15orf41
BRINP3	C16orf45
BRIP1	C16orf52
BRIX1	C16orf62
BRMS1L	C16orf72
BROX	C16orf95
BRWD1	C17orf51
BSG	C17orf53
BTBD11	C17orf67
BTBD3	C17orf97
BTBD9	C19orf44
BTC	C19orf57
BTD	C1GALT1
BTF3	C1orf105
BTG1	C1orf109
BTG3	C1orf115
BTN2A1	C1orf116
BTN3A1	C1orf127
BTN3A2	C1orf159
BTN3A3	C1orf189
BTRC	C1orf198
BUD31	C1orf21
BVES	C1orf228
BZW2	C1orf43
C10orf126	C1orf52
C10orf76	C1orf54
C10orf90	C1orf56
C11orf49	C1orf61
C11orf53	C1orf64
C11orf54	C1orf87
C11orf58	C1QTNF3
C11orf65	C1QTNF3-AMACR
C11orf71	C1QTNF7
C11orf91	C20orf194
C11orf96	C20orf196
C12orf29	C21orf2
C12orf4	C21orf62
C12orf40	C21orf91
C12orf45	C22orf31
C12orf49	C2CD2
C12orf57	C2CD3
C12orf60	C2CD5
C12orf66	C2orf42
C12orf73	C2orf68
C12orf75	C2orf69
C12orf76	C2orf71
C14orf119	C2orf72
C14orf28	C2orf73
C14orf37	C2orf80
C14orf93	C2orf88
C15orf38-AP3S2	C3orf35
C15orf41	C3orf52
C15orf52	C3orf58
C15orf61	C3orf67
C15orf65	C3orf70
C16orf45	C4orf19
C16orf46	C4orf33
C16orf52	C4orf36
C16orf62	C4orf45
C16orf74	C4orf51
C16orf87	C5
C16orf95	C5orf15
C16orf96	C5orf34
C17orf53	C6orf106
C17orf58	C6orf141
C17orf64	C6orf226
C17orf67	C6orf52
C17orf75	C6orf58
C18orf21	C6orf62
C18orf25	C6orf89
C18orf32	C7orf50
C18orf54	C7orf55-LUC7L2
C19orf44	C7orf77
C19orf81	C8A
C19orf84	C8orf33
C1GALT1	C8orf34
C1orf105	C8orf37
C1orf115	C8orf4
C1orf116	C8orf44-SGK3
C1orf127	C8orf46
C1orf198	C8orf59
C1orf21	C8orf76
C1orf226	C8orf86
C1orf228	C9
C1orf54	C9orf135
C1orf61	C9orf153
C1orf94	C9orf3
C1QL1	C9orf40
C1QTNF3-AMACR	C9orf64
C1S	C9orf85
C20orf194	C9orf92
C20orf196	CA12
C20orf27	CA13
C20orf96	CA14
C21orf2	CA3
C21orf58	CA5B
C21orf62	CA6
C21orf91	CAB39
C22orf23	CABIN1
C22orf31	CACHD1
C22orf46	CACNA1C
C2CD2	CACNA1E
C2CD2L	CACNA2D1
C2CD3	CACNB2
C2CD4D	CACNB4
C2CD5	CADM1
C2orf42	CADM2
C2orf71	CADPS2
C2orf72	CALCRL
C2orf73	CALD1
C2orf80	CALM1
C2orf91	CALML3
C3orf58	CAMK1D
C3orf70	CAMK2D
C4orf19	CAMK4
C4orf33	CAMKMT
C4orf45	CAMSAP1
C4orf46	CAMSAP2
C5	CAMTA1
C5orf15	CANT1
C5orf22	CANX
C5orf24	CAP1
C5orf30	CAP2
C5orf34	CAPN2
C5orf38	CAPN7
C5orf42	CAPN9
C5orf67	CAPRIN2
C6orf226	CAPZA1
C6orf52	CAPZA2
C6orf58	CAPZB
C6orf89	CARD14
C7orf25	CARD16
C7orf50	CARD17
C7orf55-LUC7L2	CARD19
C8orf34	CARF
C8orf37	CARHSP1
C8orf4	CARMIL1
C8orf44-SGK3	CARMIL2
C8orf46	CARNMT1
C8orf59	CARS
C8orf86	CARS2
C9orf3	CASC1
C9orf72	CASC4
C9orf85	CASK
CA10	CASP8
CA12	CASP8AP2
CA13	CASP9
CA14	CASQ2
CA3	CAST
CA5A	CASZ1
CA6	CATSPERB
CAAP1	CAV1
CAB39L	CAV2
CABIN1	CAVIN1
CABLES1	CAVIN2
CABP1	CAVIN3
CABYR	CBFA2T2
CACHD1	CBL
CACNA1A	CBLB
CACNA1C	CBR1
CACNA1D	CBR3
CACNA1E	CBR4
CACNA1S	CBX2
CACNA2D1	CBX3
CACNB1	CBX5
CACNB2	CC2D2A
CACNB3	CCDC103
CACNB4	CCDC107
CACNG4	CCDC110
CACNG7	CCDC113
CACUL1	CCDC122
CACYBP	CCDC126
CADM1	CCDC129
CADM2	CCDC13
CADM3	CCDC130
CAGE1	CCDC138
CALB2	CCDC140
CALCRL	CCDC141
CALD1	CCDC146
CALM1	CCDC148
CALN1	CCDC149
CALU	CCDC15
CAMK1D	CCDC151
CAMK1G	CCDC158
CAMK2A	CCDC163
CAMK2D	CCDC171
CAMK4	CCDC173
CAMKMT	CCDC175
CAMLG	CCDC181
CAMSAP1	CCDC183
CAMSAP2	CCDC190
CAMTA1	CCDC192
CAMTA2	CCDC196
CAND1	CCDC25
CANX	CCDC33
CAP2	CCDC34
CAPN2	CCDC47
CAPN7	CCDC50
CAPN9	CCDC57
CAPRIN1	CCDC58
CAPRIN2	CCDC62
CAPS2	CCDC7
CAPZB	CCDC71L
CARD10	CCDC77
CARD19	CCDC80
CARD8	CCDC82
CARF	CCDC83
CARNMT1	CCDC84
CARS	CCDC85C
CASC1	CCDC88A
CASC3	CCDC88C
CASC4	CCDC91
CASD1	CCKAR
CASP8AP2	CCL28
CASQ2	CCM2
CAST	CCNA2
CATSPERZ	CCNB1IP1
CAVIN1	CCND2
CAVIN2	CCND3
CBFA2T2	CCNE2
CBL	CCNG2
CBLB	CCNI
CBLL1	CCNK
CBLN1	CCNL1
CBLN2	CCNYL1
CBR3	CCP110
CBR4	CCPG1
CBWD1	CCR5
CBWD2	CCS
CBWD3	CCSAP
CBWD6	CCSER1
CBX1	CCSER2
CBX2	CCT3
CBX3	CCT5
CBX4	CCT6A
CBX5	CCT8L2
CBX7	CD109
CC2D2B	CD164
CCDC103	CD200
CCDC107	CD200R1
CCDC114	CD2AP
CCDC122	CD36
CCDC126	CD3G
CCDC13	CD44
CCDC134	CD5
CCDC138	CD59
CCDC140	CD63
CCDC146	CD69
CCDC148	CD83
CCDC149	CD9
CCDC15	CD96
CCDC151	CDC14A
CCDC167	CDC14B
CCDC168	CDC25B
CCDC171	CDC37L1
CCDC178	CDC42
CCDC18	CDC42BPA
CCDC181	CDC42BPB
CCDC184	CDC42EP3
CCDC190	CDC42SE1
CCDC192	CDC42SE2
CCDC25	CDC5L
CCDC28A	CDC6
CCDC33	CDC7
CCDC38	CDC73
CCDC39	CDCA4
CCDC47	CDCA7
CCDC50	CDCA7L
CCDC58	CDH1
CCDC59	CDH10
CCDC6	CDH11
CCDC61	CDH12
CCDC62	CDH13
CCDC77	CDH18
CCDC78	CDH19
CCDC80	CDH2
CCDC82	CDH20
CCDC85B	CDH22
CCDC88A	CDH3
CCDC88C	CDH4
CCDC91	CDH5
CCDC92	CDH8
CCNA2	CDHR2
CCNB1	CDHR3
CCNB1IP1	CDIP1
CCNB2	CDK11A
CCND1	CDK13
CCND2	CDK14
CCND3	CDK15
CCNE2	CDK16
CCNG2	CDK17
CCNH	CDK2
CCNJL	CDK4
CCNT1	CDK5
CCNY	CDK5RAP2
CCNYL1	CDK6
CCP110	CDKAL1
CCPG1	CDKL1
CCR10	CDKL5
CCS	CDKN1A
CCSAP	CDKN1B
CCSER1	CDKN2AIP
CCSER2	CDKN2C
CCT3	CDKN3
CCT5	CDON
CCT6A	CDR2
CCT7	CDRT4
CCT8	CDYL
CD164	CECR2
CD200	CELA2A
CD200R1	CELF1
CD226	CELF2
CD244	CELSR1
CD248	CELSR2
CD276	CEMIP
CD2AP	CENPP
CD36	CENPS-CORT
CD3E	CEP104
CD3G	CEP112
CD46	CEP126
CD47	CEP128
CD48	CEP135
CD59	CEP164
CD63	CEP170
CD70	CEP170B
CD83	CEP19
CD9	CEP192
CD96	CEP295
CDADC1	CEP295NL
CDC123	CEP350
CDC14A	CEP41
CDC14B	CEP57
CDC25B	CEP78
CDC25C	CEP85
CDC26	CEP85L
CDC27	CEP97
CDC37	CEPT1
CDC37L1	CERKL
CDC42	CERS2
CDC42BPA	CERS3
CDC42EP3	CERS6
CDC42SE1	CETN3
CDC42SE2	CFAP161
CDC7	CFAP20
CDC73	CFAP44
CDCA3	CFAP65
CDCA7	CFAP74
CDCA7L	CFAP97
CDH1	CFDP1
CDH10	CFL1
CDH11	CFL2
CDH13	CFLAR
CDH18	CFTR
CDH19	CGNL1
CDH2	CGRRF1
CDH20	CHAMP1
CDH22	CHCHD3
CDH26	CHCHD6
CDH3	CHD1
CDH4	CHD1L
CDH5	CHD2
CDH6	CHD3
CDH7	CHD4
CDH8	CHD7
CDHR3	CHD8
CDIP1	CHD9
CDK12	CHEK2
CDK13	CHI3L2
CDK14	CHIC2
CDK16	CHIT1
CDK17	CHKA
CDK19	CHL1
CDK2	CHMP5
CDK2AP1	CHMP6
CDK4	CHN1
CDK5RAP2	CHN2
CDK5RAP3	CHODL
CDK6	CHORDC1
CDK8	CHPF
CDKAL1	CHRAC1
CDKL1	CHRDL1
CDKN1B	CHRM2
CDKN2AIP	CHRM3
CDKN2C	CHRNA1
CDNF	CHRNA5
CDO1	CHRNA7
CDR2	CHRNA9
CDRT4	CHST11
CDS2	CHST12
CEACAM1	CHST14
CEBPD	CHST2
CEBPG	CHST3
CECR2	CHST7
CELF1	CHST9
CELF2	CHSY1
CENPA	CHSY3
CENPC	CHTF8
CENPL	CHTOP
CENPM	CHURC1-FNTB
CENPN	CIAO1
CENPT	CIDEC
CENPV	CIPC
CEP112	CIT
CEP120	CITED2
CEP126	CKAP5
CEP135	CKB
CEP152	CKS1B
CEP164	CKS2
CEP170	CLASP1
CEP192	CLASP2
CEP250	CLCC1
CEP290	CLCN2
CEP295	CLCN3
CEP295NL	CLCN5
CEP350	CLDN10
CEP41	CLDN11
CEP44	CLDN12
CEP57	CLDN16
CEP57L1	CLDN20
CEP76	CLDN23
CEP83	CLDN25
CEP85L	CLEC12A
CEP95	CLEC16A
CEPT1	CLEC19A
CERKL	CLEC1A
CERS6	CLEC1B
CETN3	CLHC1
CFAP161	CLIC4
CFAP20	CLIC6
CFAP206	CLINT1
CFAP36	CLIP1
CFAP44	CLIP4
CFAP61	CLK1
CFAP77	CLK2
CFAP97	CLLU1
CFDP1	CLLU1OS
CFHR2	CLMN
CFL1	CLMP
CFL2	CLN8
CFTR	CLNK
CGGBP1	CLNS1A
CGN	CLOCK
CGNL1	CLPTM1L
CHADL	CLRN1
CHCHD3	CLSTN1
CHCHD6	CLTA
CHD1	CLU
CHD2	CLUL1
CHD3	CLVS1
CHD4	CLVS2
CHD6	CMAS
CHD7	CMC2
CHD8	CMIP
CHD9	CMPK1
CHEK1	CMSS1
CHEK2	CMTM4
CHFR	CMTM5
CHGB	CMTM6
CHI3L1	CMTM7
CHI3L2	CMTM8
CHIC2	CMYA5
CHIT1	CNBD1
CHKA	CNDP2
CHL1	CNGB1
CHML	CNGB3
CHMP1B	CNIH3
CHMP4B	CNIH4
CHMP6	CNKSR2
CHN1	CNKSR3
CHN2	CNMD
CHODL	CNN3
CHORDC1	CNOT3
CHP1	CNOT4
CHPT1	CNOT6L
CHRAC1	CNOT7
CHRM3	CNOT9
CHRM5	CNST
CHRNA4	CNTD1
CHRNA5	CNTN1
CHST10	CNTN5
CHST11	CNTNAP2
CHST12	CNTRL
CHST3	COA1
CHST6	COA4
CHST7	COA7
CHST8	COBL
CHST9	COBLL1
CHSY1	COG1
CHSY3	COG2
CIART	COG5
CIC	COG6
CIDEC	COL10A1
CIPC	COL11A1
CISD1	COL14A1
CISD2	COL15A1
CIT	COL16A1
CITED2	COL19A1
CKAP4	COL21A1
CKS1B	COL22A1
CKS2	COL23A1
CLASP1	COL24A1
CLASP2	COL25A1
CLASRP	COL27A1
CLCN3	COL28A1
CLDN10	COL2A1
CLDN11	COL4A1
CLDN12	COL4A2
CLDN20	COL4A3
CLEC12A	COL4A6
CLEC16A	COL5A2
CLEC19A	COL6A1
CLEC1A	COL6A3
CLEC1B	COL8A1
CLEC2B	COL9A1
CLGN	COL9A2
CLIC4	COL9A3
CLINT1	COLCA2
CLIP1	COLGALT2
CLIP2	COMMD1
CLK2	COPA
CLK4	COPB1
CLMP	COPS2
CLNS1A	COPS5
CLOCK	COPS6
CLPB	COPS7A
CLSPN	COPS7B
CLSTN1	COPZ1
CLSTN2	COQ10A
CLTA	COQ10B
CLTC	COQ2
CLU	COQ6
CLUL1	CORIN
CLVS1	CORO1C
CMBL	CORO2B
CMC2	CORO7
CMIP	CORO7-PAM16
CMSS1	CORT
CMTM4	COTL1
CMTM6	COX14
CMTM7	COX18
CMTM8	COX19
CMTR1	COX20
CMTR2	COX7A2
CMYA5	COX8A
CNBD1	CP
CNBD2	CPA2
CNDP2	CPA5
CNIH3	CPA6
CNKSR2	CPB1
CNKSR3	CPD
CNMD	CPE
CNN3	CPEB1
CNNM2	CPEB2
CNOT1	CPEB3
CNOT10	CPEB4
CNOT2	CPED1
CNOT3	CPM
CNOT4	CPNE4
CNOT6L	CPNE5
CNOT8	CPNE8
CNPY2	CPPED1
CNPY3	CPQ
CNPY4	CPSF4L
CNST	CPSF6
CNTD1	CPSF7
CNTLN	CPT1A
CNTN1	CPVL
CNTN5	CR1
CNTNAP1	CRABP2
CNTNAP2	CRADD
CNTNAP4	CRB1
CNTNAP5	CREB1
CNTRL	CREB3
CNTROB	CREB3L2
COA1	CREB3L4
COA4	CREB5
COA6	CREBBP
COBL	CREBL2
COG1	CREBRF
COG2	CREBZF
COG5	CREG1
COG7	CREM
COL11A1	CRIM1
COL12A1	CRIPT
COL14A1	CRISPLD1
COL15A1	CRISPLD2
COL19A1	CRK
COL1A1	CRLS1
COL20A1	CROCC2
COL22A1	CROT
COL23A1	CRTAP
COL25A1	CRTC1
COL27A1	CRTC3
COL28A1	CRY1
COL2A1	CRYAA
COL4A1	CRYAB
COL4A2	CRYBG1
COL4A3	CRYBG3
COL4A3BP	CRYGN
COL5A3	CRYL1
COL6A1	CRYM
COL6A3	CRYZL1
COL9A1	CS
COL9A3	CSDE1
COLEC12	CSGALNACT1
COLGALT1	CSK
COLGALT2	CSMD1
COMMD3	CSMD3
COMMD3-BMI1	CSNK1E
COPB1	CSNK1G1
COPB2	CSNK2A2
COPE	CSPG4
COPS2	CSPG5
COPS3	CSPP1
COPS4	CSRNP2
COPS5	CSRNP3
COPS6	CSRP1
COPZ1	CSRP2
COPZ2	CSRP3
COQ10B	CST3
COQ2	CST9
COQ3	CSTF3
COQ8B	CTAGE5
CORIN	CTBP2
CORO1C	CTC1
CORO2B	CTCF
CORO7	CTDSP2
CORO7-PAM16	CTDSPL
COTL1	CTDSPL2
COX10	CTH
COX11	CTNNA1
COX14	CTNNA3
COX18	CTNNAL1
COX20	CTNNB1
COX7A2	CTNNBIP1
CP	CTNND1
CPB2	CTNND2
CPD	CTPS1
CPE	CTR9
CPEB2	CTSB
CPEB3	CTSC
CPEB4	CTSL
CPLX2	CTSO
CPLX4	CTSS
CPM	CTTN
CPNE2	CTTNBP2
CPNE5	CTTNBP2NL
CPSF1	CTXND1
CPSF6	CUBN
CPT1A	CUEDC1
CPVL	CUL1
CRADD	CUL2
CRAMP1	CUL3
CRB1	CUL4A
CREB3L2	CUL4B
CREB3L4	CUX1
CREB5	CWC27
CREBBP	CX3CL1
CREBL2	CXADR
CREG1	CXCL11
CRELD2	CXCL8
CREM	CXCR4
CRIM1	CXorf56
CRIPT	CXorf57
CRISPLD1	CXXC4
CRISPLD2	CYB5B
CRLF3	CYB5R4
CRLS1	CYBRD1
CRMP1	CYCS
CROCC2	CYP1A1
CROT	CYP24A1
CRTAP	CYP26B1
CRTC3	CYP27A1
CRY1	CYP2J2
CRYAA	CYP2U1
CRYGA	CYP39A1
CRYGD	CYP3A43
CRYL1	CYP4V2
CRYM	CYP7B1
CRYZ	CYR61
CRYZL1	CYTH1
CS	CYTH3
CSAD	CYYR1
CSDC2	DAAM1
CSF1R	DAAM2
CSGALNACT1	DAB1
CSMD1	DAB2
CSMD2	DAB2IP
CSMD3	DACH1
CSNK1D	DACT1
CSNK1E	DAG1
CSNK1G1	DAP
CSNK1G3	DAP3
CSNK2B	DAPK1
CSPG4	DAPL1
CSPG5	DARS
CSPP1	DARS2
CSRNP2	DBF4
CSRNP3	DBI
CSRP1	DBNDD1
CSRP2	DBT
CTAGE5	DCAF11
CTBP2	DCAF12
CTBS	DCAF13
CTC1	DCAF17
CTCF	DCAF5
CTDSP2	DCAF6
CTDSPL	DCAF8
CTDSPL2	DCAKD
CTH	DCBLD1
CTIF	DCBLD2
CTNNA1	DCC
CTNNA2	DCDC1
CTNNA3	DCDC2
CTNNAL1	DCHS1
CTNNB1	DCHS2
CTNNBL1	DCLK2
CTNND1	DCP1A
CTNND2	DCP1B
CTPS1	DCPS
CTSC	DCST1
CTSL	DCTD
CTTNBP2	DCTN2
CTTNBP2NL	DCTN6
CTXND1	DCUN1D1
CUBN	DCUN1D2
CUEDC1	DCUN1D3
CUL4B	DCX
CUX1	DDAH1
CUX2	DDB1
CX3CL1	DDB2
CXADR	DDHD1
CXCR4	DDHD2
CXorf57	DDI2
CXXC4	DDIAS
CXXC5	DDIT3
CYB5D2	DDR1
CYB5R1	DDR2
CYB5R4	DDX10
CYBRD1	DDX17
CYLD	DDX20
CYP19A1	DDX3X
CYP1A1	DDX5
CYP20A1	DDX56
CYP26B1	DDX58
CYP27A1	DDX59
CYP39A1	DDX6
CYP4V2	DDX60L
CYP51A1	DEAF1
CYP7B1	2020-12-01
CYTH1	DEDD
CYTH3	DEGS1
CYTH4	DEK
CYYR1	DENND1A
DAAM1	DENND1B
DAB1	DENND2A
DACH1	DENND2C
DACT3	DENND3
DAD1	DENND4A
DAG1	DENND4B
DAPK3	DENND4C
DAPL1	DENND5A
DARS	DENND5B
DARS2	DENND6A
DAXX	DEPDC5
DBF4	DEPTOR
DBI	DERA
DBNDD1	DERL1
DBT	DESI2
DCAF11	DFFB
DCAF12	DFNA5
DCAF13	DFNB59
DCAF16	DGCR6
DCAF5	DGKA
DCAF6	DGKB
DCAF7	DGKG
DCBLD1	DGKI
DCBLD2	DGKZ
DCC	DGUOK
DCDC2	DHCR24
DCK	DHCR7
DCLK2	DHRS3
DCP1B	DHRS9
DCP2	DHX15
DCPS	DHX30
DCST1	DHX35
DCTD	DHX37
DCTN2	DHX9
DCTN4	DIAPH1
DCTN6	DIAPH2
DCTPP1	DICER1
DCUN1D3	DIDO1
DCX	DIEXF
DDAH1	DIO1
DDC	DIP2B
DDHD2	DIP2C
DDIAS	DIRC3
DDIT3	DIS3L
DDIT4	DIS3L2
DDR1	DISC1
DDR2	DISP1
DDX10	DIXDC1
DDX11	DKK3
DDX17	DLC1
DDX19B	DLD
DDX39A	DLG1
DDX3X	DLG2
DDX4	DLGAP1
DDX42	DLGAP4
DDX46	DLL1
DDX49	DLX1
DDX5	DLX2
DDX52	DMC1
DDX58	DMD
DDX59	DMRTA1
DDX6	DMTF1
DDX60L	DMXL2
2020-12-01	DNAH11
DECR1	DNAH7
DEDD	DNAH8
DEDD2	DNAH9
DENND1A	DNAI1
DENND1B	DNAJA1
DENND2A	DNAJA4
DENND3	DNAJB1
DENND4A	DNAJB4
DENND4B	DNAJB6
DENND4C	DNAJB9
DENND5A	DNAJC1
DENND5B	DNAJC10
DEPDC1	DNAJC13
DEPDC1B	DNAJC16
DEPDC4	DNAJC18
DEPDC5	DNAJC19
DEPDC7	DNAJC2
DERA	DNAJC21
DERL1	DNAJC25
DESI1	DNAJC27
DESI2	DNAJC3
DFFB	DNAJC5
DGCR2	DNAJC6
DGCR6	DNAJC7
DGKA	DNAL4
DGKB	DNASE1
DGKE	DNER
DGKG	DNHD1
DGKH	DNM1L
DGKI	DNM3
DHCR7	DNMBP
DHFR2	DOCK10
DHPS	DOCK11
DHRS11	DOCK3
DHRS13	DOCK4
DHRS7	DOCK5
DHX29	DOCK7
DHX32	DOK5
DHX35	DOK6
DHX37	DONSON
DHX38	DOPEY2
DHX8	DPF2
DHX9	DPH5
DIAPH1	DPH6
DIAPH3	DPP10
DICER1	DPP4
DIDO1	DPP6
DIMT1	DPP8
DIP2B	DPPA4
DIP2C	DPT
DIRC2	DPY19L1
DIRC3	DPY19L2
DIS3L	DPY30
DIS3L2	DPYD
DISC1	DPYS
DISP1	DPYSL2
DISP3	DPYSL3
DIXDC1	DPYSL5
DLC1	DR1
DLG1	DRC1
DLG2	DRD1
DLGAP1	DRG1
DLGAP4	DROSHA
DLK1	DSCAM
DLL1	DSCAML1
DLL3	DSCR3
DMC1	DSE
DMD	DSEL
DMTF1	DST
DMXL1	DSTN
DMXL2	DSTYK
DNAAF4	DTD2
DNAH10	DTHD1
DNAH11	DTL
DNAH14	DTNA
DNAH3	DTNB
DNAH6	DTNBP1
DNAH7	DUSP1
DNAH9	DUSP10
DNAI1	DUSP11
DNAI2	DUSP12
DNAJA1	DUSP14
DNAJA2	DUSP16
DNAJA4	DUSP19
DNAJB1	DUSP22
DNAJB12	DUSP6
DNAJB4	DVL3
DNAJB9	DWORF
DNAJC1	DYM
DNAJC13	DYNC1H1
DNAJC14	DYNC1I1
DNAJC19	DYNC1I2
DNAJC21	DYNC1LI1
DNAJC25-GNG10	DYNC1LI2
DNAJC3	DYNC2H1
DNAJC5	DYNLL1
DNAJC6	DYNLRB1
DNAL4	DYRK1A
DNER	DYRK3
DNHD1	DZANK1
DNM1L	DZIP1L
DNM2	E2F2
DNM3	E2F3
DNMBP	E2F5
DNMT1	E2F6
DNMT3B	E2F7
DOCK10	EAPP
DOCK3	EBF1
DOCK4	ECE1
DOCK7	ECHDC1
DOCK9	ECHDC2
DOK5	ECI1
DOK6	ECM1
DOLK	ECM2
DONSON	ECT2
DOPEY2	ECT2L
DPAGT1	EDAR
DPF2	EDC3
DPH6	EDEM3
DPM1	EDIL3
DPP10	EDN2
DPP6	EEA1
DPY19L1	EEF1A1
DPY19L2	EEF1G
DPY19L3	EEFSEC
DPY30	EEPD1
DPYD	EFCAB1
DPYS	EFCAB11
DPYSL2	EFCAB2
DPYSL3	EFCAB5
DPYSL5	EFCAB6
DR1	EFEMP1
DRAM1	EFHB
DRAM2	EFHC1
DRC3	EFHC2
DRD1	EFL1
DRG1	EFNA1
DROSHA	EFNA3
DSCAM	EFNA5
DSCAML1	EFNB2
DSCC1	EFR3A
DSCR3	EFR3B
DSE	EFS
DSEL	EGF
DSG2	EGFLAM
DSN1	EGFR
DST	EGLN1
DSTN	EGLN3
DSTYK	EHBP1
DTD1	EHD1
DTD2	EHD3
DTHD1	EHD4
DTL	EHF
DTNA	EHHADH
DTNB	EHMT1
DTNBP1	EIF1AX
DTWD1	EIF2AK2
DUS4L	EIF2AK4
DUSP1	EIF2B2
DUSP10	EIF2B3
DUSP14	EIF2B5
DUSP16	EIF2S1
DUSP22	EIF2S3
DUSP4	EIF3D
DUSP5	EIF3E
DUSP6	EIF3H
DUT	EIF3L
DYM	EIF4A2
DYNC1I1	EIF4B
DYNC1LI1	EIF4E
DYNC1LI2	EIF4E2
DYNC2H1	EIF4E3
DYNLL1	EIF4EBP1
DYNLL2	EIF4ENIF1
DYNLRB1	EIF4G1
DYRK1A	EIF4G2
DYRK2	EIF4G3
DYRK3	EIF4H
DYRK4	EIF5
DZANK1	EIPR1
DZIP3	ELAC2
E2F1	ELAVL2
E2F3	ELF1
E2F5	ELF2
E2F7	ELK3
EAPP	ELK4
EBAG9	ELL2
EBF1	ELL3
EBF4	ELMO1
ECHDC1	ELMO2
ECI1	ELMSAN1
ECI2	ELOA
ECM1	ELOC
ECT2	ELOVL6
EDDM13	ELP1
EDEM3	ELP3
EDIL3	ELP6
EDNRB	EMC3
EEA1	EMC9
EED	EMCN
EEF1A1	EMID1
EEF2	EML1
EEFSEC	EML4
EEPD1	EML6
EFCAB11	EMP1
EFCAB12	EMP2
EFCAB13	ENAH
EFCAB14	ENC1
EFCAB2	ENDOD1
EFCAB5	ENKUR
EFCAB7	ENO1
EFHB	ENO4
EFHC1	ENOPH1
EFNA1	ENOX1
EFNA3	ENOX2
EFNA5	ENPEP
EFNB2	ENPP2
EFR3A	ENPP3
EFR3B	ENPP7
EFTUD2	ENSA
EGF	ENTPD1
EGFLAM	ENTPD4
EGFR	ENTPD5
EGLN1	ENTPD6
EGLN3	EP300
EGR2	EPB41
EHBP1	EPB41L2
EHD1	EPB41L3
EHD3	EPB41L4A
EHD4	EPB41L4B
EHF	EPC2
EHHADH	EPCAM
EHMT1	EPDR1
EID2	EPHA3
EIF1	EPHA4
EIF1AD	EPHA5
EIF2A	EPHA6
EIF2AK4	EPHA7
EIF2B3	EPHB2
EIF2B5	EPHB3
EIF2S2	EPM2A
EIF3B	EPN2
EIF3D	EPS15
EIF3E	EPS15L1
EIF3H	EPS8
EIF3J	EPYC
EIF3L	ERAP1
EIF4A1	ERBB3
EIF4A2	ERBB4
EIF4B	ERC1
EIF4EBP1	ERC2
EIF4ENIF1	ERCC3
EIF4G1	ERCC4
EIF4G2	ERCC6L2
EIF4G3	ERG
EIF4H	ERI2
EIF5	ERI3
EIF5A	ERLIN2
EIPR1	ERMN
ELAC1	ERN1
ELAVL2	ERO1A
ELAVL4	ERP27
ELF1	ERP44
ELF2	ERRFI1
ELFN2	ERVMER34-1
ELK3	ESAM
ELL	ESR1
ELL2	ESR2
ELMO1	ESRRB
ELMO2	ESRRG
ELMSAN1	ESYT1
ELOC	ESYT2
ELOVL5	ETNK1
ELOVL6	ETS1
ELP1	ETS2
ELP2	ETV1
ELP3	ETV3
ELP4	ETV5
EMB	ETV6
EMC2	EVA1A
EMC3	EVA1C
EMC7	EVI2A
EMC9	EVI5
EMILIN2	EVL
EML2	EWSR1
EML4	EXD3
EML6	EXOC1
EMP1	EXOC2
EMP2	EXOC4
EMP3	EXOC5
ENAH	EXOC6B
ENC1	EXOSC10
ENDOD1	EXOSC2
ENO1	EXOSC4
ENO4	EXOSC9
ENOPH1	EXPH5
ENOSF1	EXT1
ENOX1	EXTL1
ENOX2	EXTL2
ENPP2	EXTL3
ENPP3	EYA1
ENPP6	EYA2
ENTPD1	EYA3
ENTPD6	EYS
ENY2	EZH2
EP300	EZR
EPAS1	F11R
EPB41	F5
EPB41L1	FABP5
EPB41L2	FABP7
EPB41L3	FADD
EPB41L4A	FADS2
EPB41L4B	FADS3
EPC1	FAF1
EPC2	FAIM2
EPCAM	FAM102B
EPDR1	FAM105A
EPG5	FAM107A
EPHA3	FAM107B
EPHA4	FAM110B
EPHA5	FAM111A
EPHA7	FAM114A1
EPHB1	FAM117B
EPHX1	FAM118A
EPM2A	FAM118B
EPM2AIP1	FAM120A
EPN2	FAM120B
EPRS	FAM120C
EPS15	FAM122B
EPS8	FAM129A
EPS8L1	FAM129B
ERBB2	FAM129C
ERBB3	FAM131A
ERBB4	FAM131B
ERBIN	FAM133B
ERC1	FAM135A
ERC2	FAM136A
ERCC1	FAM13A
ERCC4	FAM13C
ERCC6L2	FAM155A
[truncated: 4,844 more rows]
